# Supplementary material
Source: HighWire-hosted journal article supplement (https://bmjopenrespres.bmj.com/content/10/1/e001358)
Supplement: inline-supplementary-material-3 [file inline-supplementary-material-3.xlsx]

## Sheet: Sheet1
Species	DNA-2098350022689	DNA-2098350030127	DNA-2098350030325	DNA-2098350030721	DNA-2098350030875	DNA-2098350031223	DNA-2098350031285	DNA-2098350031841	DNA-2098350040812	DNA-2180950030079	DNA-2180950030505	DNA-2180950030703	DNA-2180950030710	DNA-2180950030819	DNA-2180950063510	DNA-2180950063732	DNA-2180950064029	DNA-2180950064036	DNA-2180950065576	DNA-2180950065651	DNA-2180950065699	DNA-2180950065996	M1468-1-68D	M1937-1-N762D	DNA-2098350020449	DNA-2098350020517	DNA-2098350020982	DNA-2098350021194	DNA-2098350022719	DNA-2098350030172	DNA-2098350030189	DNA-2098350030295	DNA-2098350030356	DNA-2098350030387	DNA-2098350030394	DNA-2098350030554	DNA-2098350030578	DNA-2098350030585	DNA-2098350030615	DNA-2098350030684	DNA-2098350030738	DNA-2098350030790	DNA-2098350030912	DNA-2098350031056	DNA-2098350031100	DNA-2098350031162	DNA-2098350031193	DNA-2098350031230	DNA-2098350031254
Abiotrophia_defectiva	0	0	0	0	0.451576	0.00381632	0.000298775	0	0	0.000383338	0.120979	0	0	0.000136633	0	0.000358938	0	0	0.010929	0	0	0.000112549	0	0.00486295	0	0	0.0012066	0.000195762	0	0	0.00162017	0	0.217222	0.0527953	0	0	0.00328947	0	0.00540084	0	0	0	0	0	0	0.0338893	0	0	0.00409756
Acanthamoeba_lenticulata	0	0	0	0	0	0	0	0	0	0	0	0	0	0	0	0	0	0	0	0	0	0	0	0	0	0	0	0	0	0	0	0	0	0	0	0	0	0	0	0	0	0	0	0	0	0	0	0	0
Acanthamoeba_mauritaniensis	0	0	0	0	0	0	0	0	0	0.000127779	0	0	0	0	0	0	0	0	0	0	0	0	0	0	0	0	0	0	0.000107724	0.00176429	0	0	0	0	0.000214707	0	0.00164474	0	0	0	0	0	0	0	0	0	0	0	0
Acanthamoeba_palestinensis	0	0.000232518	0	0	0.000178031	0.000246214	0	0	0	0	0	0	0	5.85572e-05	0	0	0	0	0	0	0	0	0	0	0	0	0	0	0.000107724	0.0299929	0	0	0	0	0	0	0	0	0	0	0	0	4.88293e-05	0	0	0	0	0	0
Acetanaerobacterium_elongatum	0	0	0	0	0	0	0	0	0	0	0	0	0	0	0	0	0	0	0	0	0	0	0	0	0.15	0.00055991	0	0	0	0	0	0	0	0	0	0	0	0	0	0	0	0	0	0	0	0	0	0	0
Acetitomaculum_ruminis	0	0	0	0	0	0	0	0	0	0	0	0	0	0	0	1.3294e-05	0	0	0	0	0	0	0	0	0	0	0	0	0	0	0	0	0	0	0	0	0	0	0	0	0	0	0	0	0	0	0	0	0
Acetivibrio_ethanolgignens	0	0	0	0	0.000178031	0	0	0	0	0	0	0	0	0	0	0	0	0	0	8.60359e-06	0	0	0	0	0	0	0	0	0	0	0	0	0	4.8534e-06	0	0	0	0	0	0	0	0	0	0	0	0	0	0	0
Acetobacter_aceti	0	0	0	0	0	0	0	0	0	0	0	0	0	0	0	0	0	0	0	0	0	0	0	0	0	0	0	0	0	0	0	0	0	0	0	0	0	0	0	0	0	0	0	0	0	0	0	0	5.57491e-05
Acetobacter_cibinongensis	0	0	0	0	0	0	0	0	0	0	0	0	0	0	0	0	0	0	0	0	0	0	0	0	0	0	0	0	0	0	0	0	0	0	0	0	0	0	0	0	0	0	0	0	0	1.47859e-05	0	0	0
Acetobacter_ghanensis	0	0	0	0	0	0	0	0	0	0	0	0	0	0	0	0	0	0	0	0	0	0	0	0	0	0	0	0	0	0	0	0	0	0	0	0	0	0	0	0	0	0	0	0	0	0	0	0	0
Acetobacter_indonesiensis	0	0	0	0	0	0	0	0	0	0	0	0	0	0	0	0	0	0	0	0	0	0	0	0	0	0	0	0	0	0	0	8.90107e-05	0	0	0	0	0	0	0	0	0	0	0	0	0	0	0	0	0.000111498
Acetobacter_nitrogenifigens	0	0	0	0	0	0	0	0	0	0	0	0	0	0	0	0	0	0	0	0	0	0	0	0	0	0	0	0	0	0	0	0	0	0	0	0	0	0	0	0	0	0	0	0	0	0	0	0	0
Acetobacter_pasteurianus	0	0	0	0	0	0.000492429	0	0	0	0	0	0	0	0	0	0	0	0	0	0	0	0	0	0	0	0	0	0	0	0	0	0	0	0	0	0	0	0	0	0	0	0	0	0	0	0	0	0	0
Acetobacterium_bakii	0	0	0	0	0	0	0	0	0	0	0	0	0	0	0	0	0	0	0	0	0	0	0	0	0	0	0	0	0	0	0	0	0	0	0	0	0	0	0	0	0	0	0	0	0	0	0	0	0
Acetobacterium_dehalogenans	0	0	0	0	0	0	0	0	0	0	0	0	0	0	0	0	0	0	0	0	0	0	0	0	0	0	0	0	0	0	0	0	0	0	0	0	0	0	0	0	0	0	0	0	0	0	0	0	0
Acetobacterium_wieringae	0	0	0	0	0	0	0	0	0	0	0	0	0	0	0	0	0	0	0	0	0	0	0	0	0	0	0	0	0	0	0	0	0	0	0	0	0	0	0	0	0	0	0	0	0	0	0	0	0
Acetobacterium_woodii	0	0	0	0	0	0	0	0	0	0	0	0	0	0	0	0	0	0	0	0	0	0	0	0	0	0	0	0	0	0	0	0	0	0	0	0	0	0	0	0	0	0	0	0	0	0	0	0	0
Acholeplasma_axanthum	0	0	0	0	0	0	0	0	0	0	0	0	0	0	0	0	0	0	0	0	0	0	0	0	0	0	0	0	0	0	0	0	0	0	0	0	0	0	0	0	0	0	0	0	0	0	0	0	0
Acholeplasma_brassicae	0	0	0	0	0	0	0	0	0	0	0	0	0	0	0	0	0	0	0	0	0	0	0	0	0	0	0	0	0	0	0	0	0	0	0	0	0	0	0	0	0	0	0	0	0	0	0	0	0
Acholeplasma_laidlawii	0	0	0	0	0	0.000246214	0	0	0	0	0	0	0	0	0	0	0	0	0	0	0	0	0	0	0	0	0	0	0	0	0	0	0	0	0	0	0	0	0	0	0	0	0	0	0	0	0	0	0
Achromobacter_denitrificans	0	0	0	0	0.000178031	0.000246214	0	0	0	0.000958344	0	0	0	1.95191e-05	0	0	0	0	0	0	0	0	0	0	0	0	0	0	0	0	0	0	0	0	0.000429415	0	0	0	0	0	0	0	0	0	0	0	0	0	0.000111498
Achromobacter_insolitus	0	0	0	0	0	0	0	0	0	0	0	0	0	0	0	0	0	0	0	0	0	0	0	0	0	0	0	0	0	0	0	0	0	0	0.000214707	0.00300752	0	0	0	0	0	0	0	0	0	0	0	0	0
Achromobacter_insuavis	0	0	0	0	0	0	0	0	0	0	0	0	0	3.90381e-05	0	0	0	0	0	0	0	0	0	0	0	0	0	0	0	0	0	0	0	0	0	0	0	0	0	0	0	0	0	0	0	0	0	0	0
Achromobacter_ruhlandii	0	0	0	0	0	0	0.000298775	0	0	0.000127779	0	0	0	0	8.59919e-05	0	0	0	0	0	0	0	0	0	0	0	0	0	0	0	0	0	0	0	0	0	0	0	0	0	0	0	0	0	0	0	0	0	0
Achromobacter_xylosoxidans	0	0	0	0	0	0.000246214	0	0	0	0.00108612	0	0	0	3.90381e-05	0	0	0	0	0	4.3018e-06	0	0.000112549	0	0	0	0	0	0	0	0	0	0	0	0	0	0	0	0	0	0	0	0	0	0	0	0	0	0	5.57491e-05
Acidaminobacter_hydrogenoformans	0	0	0	0	0	0	0	0	0	0	0	0	0	0	0	0	0	0	0	0	0	0	0	0	0	0	0	0	0	0	0	0	0	0	0	0	0	0	0	0	0	0	0	0	0	0	0	0	0
Acidaminococcus_intestini	0	0	0	0	0	0	0	0	0	0	0	0	0	0	0	1.3294e-05	0	0	0	0	0	0	0	0	0	0	0	0	0	0	0	0	0	4.8534e-06	0	0	0	0	0	0	0	0	0	0	0	0	0	0	5.57491e-05
Acidihalobacter_ferrooxidans	0	0	0	0	0	0	0	0	0	0.000255558	0	0	0	0	0	0	0	0	0	0	0	0	0	0	0	0	0	0	0	0	0	0	0	0	0	0	0	0	0	0	0	0	0	0	0	0	0	0	0
Acidipropionibacterium_acidipropionici	0	0	0	0	0.000267046	0	0.000298775	0	0	0	0	0	0	0	0	0	0	0	0	4.3018e-06	0	0	0	0	0	0	0	0	0	0	0	0	0	0	0	0	0	0	0	0	0	0	0	0	0	0	0	0	0
Acidipropionibacterium_jensenii	0	0	0	0	0	0	0	0	0	0	0	0	0	0	0	0	0	0	0	0	0.00104712	0	0	0	0	0	0	0	0	0	0	0	0	0	0	0	0	0	0	0	0	0	0	0	0	0	0	0	0
Acidipropionibacterium_thoenii	0	0	0	0	0	0	0	0	0	0	0	0	0	0	0	0	0	0	0	4.3018e-06	0	0	0	0	0	0	0	0	0	0	0	0	0	0	0	0	0	0	0	0	0	0	0	0	0	0	0	0	0
Acidisphaera_rubrifaciens	0	0	0	0	0	0	0	0	0	0	0	0	0	0	0	0	0	0	0	0	0	0	0	0	0	0	0	0	0	0	0	0	0	0	0	0	0	0	0	0	0	0	2.44147e-05	0	0	0	0	0	0
Acidithiobacillus_caldus	0	0	0	0	0	0.000246214	0	0	0	0.000127779	0	0	0	3.90381e-05	0	0	0	0	0	0	0	0	0	0	0	0	0	0	0	0.000705716	0	0	0	0	0	0	0	0	0.000506329	0	0	0	0	0	0	0	0	0	5.57491e-05
Acidithiobacillus_ferrivorans	0	0	0	0	0	0	0	0	0	0.000127779	0	0	0	0	0	0	0	0	0	0	0	0	0	0	0	0	0	0	0	0	0	0	0	0	0	0	0	0	0	0	0	0	0	0	0	0	0	0	0
Acidithiobacillus_ferrooxidans	0	0	0	0	0	0	0	0	0	0	0	0	0	0	0	0	0	0	0	0	0	0.000112549	0	0	0	0	0	0	0	0	0	0	0	0	0	0	0	0	0	0	0	0	0	0	0	0	0	0	0
Acidithiobacillus_thiooxidans	0	0	0	0	0	0	0	0	0	0	0	0	0	0	0	0	0	0	0	0	0	0	0	0	0	0	0	0	0	0	0	0	0	0	0.000429415	0	0	0	0	0	0	0	0	0	0	0	0	0	0
Acidobacterium_ailaaui	0	0	0	0	0	0	0	0	0	0	0	0	0	0	0	0	0	0	0	0	0	0	0	0	0	0	0	0	0	0	0	0	0	0	0	0	0	0	0	0	0	0	0	0	0	0	0	0	0
Acidomonas_methanolica	0	0	0	0	0	0	0	0	0	0	0	0	0	0	0	0	0	0	0	0	0	0	0	0	0	0	0	0	0	0	0	0	0	0	0	0	0	0	0	0	0	0	2.44147e-05	0	0	0	0	0	5.57491e-05
Acidothermus_cellulolyticus	0	0	0	0	0	0	0	0	0	0	0	0	0	0	0	0	0	0	0	0	0	0	0	0	0	0	0	0	0	0	0	0	0	0	0	0	0	0	0	0	0	0	0	0	0	0	0	0	0
Acidovorax_avenae	0	0	0	0	0.000178031	0	0	0	0	0.000638896	0	0	0	0	0	0	0	0	0	0	0	0	0	0	0	0	0	0	0	0.000705716	0	3.56043e-05	0	0	0.000644122	0.00300752	0	0	0.000675105	0	0	0	6.10366e-05	0	0	0	0	0	0.000111498
Acidovorax_citrulli	0	0	0.00299401	0	0	0	0	0	0	0.000383338	0	0	0	0	0	0	0	0	0	0	0	0	0	0	0	0	0	0	0	0	0	3.56043e-05	0	0	0.000214707	0	0	0	0.000337553	0	0	0	0	0	0	0	0	0	0
Acidovorax_ebreus	0	0	0	0	0	0.000492429	0.000298775	0	0	0.00108612	0	0	0	0	0	0	0	0.00683413	0	0	0	0.000112549	0	0	0	0	0	0	0	0	0	0	0	4.8534e-06	0.000644122	0	0	0	0	0	0	0	4.88293e-05	0.000133191	0	0	0	0	0.00015331
Acinetobacter_apis	0	0	0	0	0	0	0	0	0	0	0	0	0	0	0	0	0	0	0	0	0	0	0	0	0	0	0	0	0	0	0	0	0	0	0	0	0	0	0	0	0	0	0	0	0	0	0	0	0
Acinetobacter_baumannii	0	0	0.57485	0	0	0.00270836	0.000746938	0	0	0.000638896	0	0	0	0	0	2.6588e-05	0	0	0	3.01126e-05	0.00209424	0.000112549	0	0	0	0	0.000134066	0	0	0.00247001	0.00672433	0.610667	0	0	0.0238325	0	0	0	0.00236287	0	0	0	0	0	0	0	0	0	0.00135192
Acinetobacter_beijerinckii	0	0	0	0	0	0	0	0	0	0	0	0	1.68101e-05	0	0	0	0	0	0	0	0	0	0	0	0	0	0	0	0	0	0.00090145	0	0	0	0	0	0	0	0	0	0	0	0	0	0	0	0	0	0.000111498
Acinetobacter_bereziniae	0	0	0.00449102	0	0.000267046	0.000246214	0	0	0	0.000638896	0	0	0	0	0	1.3294e-05	0	0	0	0	0	0.000112549	0	0	0	0	0	0	0	0	0.0127665	0	0	4.8534e-06	0.00493827	0.00451128	0	0.000824063	0.00202532	0.000228441	0	0	0	0.000133191	0	0	0	0.000518941	0.00100348
Acinetobacter_bohemicus	0	0	0.00299401	0	0	0.000615536	0	0	0	0.000511117	0	0	0	5.85572e-05	0	0	0	0	0	0	0	0	0	0	0	0	0	0	0	0.000705716	0.00548179	0	0	0	0.0013956	0	0	0	0.000506329	0	0	0	0	0	0	0	0	0	0.000362369
Acinetobacter_boissieri	0	0	0	0	0	0	0	0	0	0	0	0	0	0	0	0	0	0	0	0	0	0	0	0	0	0	0	0	0	0	0	0	0	0	0	0	0	0	0	0	0	0	0	0	0	0	0	0	0
Acinetobacter_bouvetii	0	0	0.00299401	0	0.000178031	0	0.00059755	0	0	0	0	0	0	0	0	0	0	0	0	0	0	0	0	0	0	0	0	0	0.000215448	0	0.0269339	0	0	0	0.00107354	0	0	0	0.000675105	0	0	0.0118577	2.44147e-05	0	0.016129	0	0	0	0.00015331
Acinetobacter_calcoaceticus	0	0	0	0	0	0	0	0	0	0	0	0	0	1.95191e-05	0	0	0	0	0	0	0	0	0	0	0	0	0	0	0	0	0.0014009	0	0	0	0	0	0	0	0	0	0	0	0	0	0	0	0	0	0.00015331
Acinetobacter_dijkshoorniae	0	0	0	0	0	0	0	0	0	0	0	0	0	1.95191e-05	0	0	0	0	0	0	0	0	0	0	0	0	0	0	0	0	0	0	0	0	0	0	0	0	0	0	0	0	0	0	0	0	0	0	0
Acinetobacter_equi	0	0	0	0	0	0	0	0	0	0.000255558	0	0	0	9.75953e-05	0	0	0	0	0	0	0	0	0	0	0	0	0	0	0	0	0	0	0	0	0	0	0	0	0	0	0	0	0	0	0	0	0	0	0
Acinetobacter_gerneri	0	0	0	0	0.000178031	0.000246214	0	0	0	0.000383338	0	0	0	0	0	0	0	0	0	0	0	0	0	0	0	0	0	0	0	0	0.000925813	0	0	0	0.000429415	0	0	0	0	0	0	0	0	0	0	0	0	0	0.000111498
Acinetobacter_guillouiae	0	0	0	0	0	0	0	0	0	0	0	0.0292398	0	0	0	9.30579e-05	0.00107991	0	0	0	0	0	0	0	0	0	0	0	0	0	0.00574979	0	0	0	0	0	0	0	0	0	0	0	0	0	0	0	0	0	0.0202091
Acinetobacter_gyllenbergii	0	0	0	0	0	0	0	0.00548446	0	0	0	0	0	0	0	0	0	0	0	0	0.0125654	0	0	0	0	0	0	0	0	0	0.000377634	0	0	0	0.00085883	0	0	0	0	0	0	0	0	0.000133191	0	0	0	0	0.000111498
Acinetobacter_haemolyticus	0	0	0	0	0	0	0	0	0	0.000958344	0	0	0	0	0	1.3294e-05	0.00107991	0	0	0	0.00104712	0	0	0	0	0	5.36265e-05	0	0	0	0.0245097	0	0	0	0.000214707	0	0	0	0.000506329	0	0	0	4.88293e-05	0	0	0	0	0.000518941	0.00100348
Acinetobacter_harbinensis	0	0	0	0	0	0	0.000298775	0	0	0.000383338	0	0	0	0	0	0	0	0	0	0	0	0	0	0	0	0	0	0	0	0.00105857	0.00672433	0	0	0	0	0	0	0	0.000337553	0	0	0	0	0	0	0	0	0	5.57491e-05
Acinetobacter_indicus	0	0	0.00598802	0	0	0.000615536	0	0	0	0.00230003	0	0	0	0	0	0	0	0	0	0	0	0	0	0	0	0	0	0	0	0.00247001	0.0177854	0.000124615	0	0	0.0027912	0	0	0	0.00236287	0	0	0.0118577	9.76586e-05	0	0	0	0	0	0.00678746
Acinetobacter_johnsonii	0	0	0	0	0	0	0	0	0	0	0	0	0	0	0	0	0	0	0	0	0	0	0	0.00176835	0	0	0	0	0	0	0	0	0	0	0	0	0	0	0	0	0	0	0	0	0	0	0	0	0
Acinetobacter_junii	0	0.000348776	0	0	0	0.00196972	0	0	0	0	0	0	0	0	0	2.6588e-05	0	0	0	3.01126e-05	0.0251309	0.000112549	0	0	0	0	0	0	0	0.00529287	0	0.00024923	0	0	0.0565754	0.0075188	0	0	0	0	0	0	0	0	0	0	0	0	0.0635122
Acinetobacter_kookii	0	0	0	0	0	0.000246214	0	0	0	0.000127779	0	0	0	1.95191e-05	0	0	0	0	0	0	0	0	0	0	0	0	0	0	0	0	0.000146181	0	0	0	0.000214707	0	0	0	0.000506329	0	0	0	0	0	0	0	0	0	0.00015331
Acinetobacter_larvae	0	0	0	0	0	0	0	0	0	0	0	0	0	0	0	0	0	0	0	0	0	0	0	0	0	0	0	0	0	0	0	0	0	0	0	0	0	0	0	0	0	0	0	0	0	0	0	0	0
Acinetobacter_lwoffii	0	0	0.00449102	0	0	0.000246214	0.000896325	0	0.011065	0	0.000260451	0	0	0	0	1.3294e-05	0.00107991	0	0	2.1509e-05	0	0	0	0	0	0	0	0	0	0	0.0130101	0	0	0	0.0193237	0	0	0	0.0035443	0	0	0	4.88293e-05	0	0	0	0	0	0.0034007
Acinetobacter_marinus	0	0	0	0	0	0	0.000298775	0	0	0.000638896	0	0	0	1.95191e-05	0	0	0	0	0	0	0	0	0	0	0	0	0	0	0	0.00211715	0.00702887	0	0	0	0.000214707	0	0	0	0	0	0	0	0	0	0	0	0	0	0
Acinetobacter_nectaris	0	0	0	0	0	0	0	0	0	0	0	0	0	0	0	0	0	0	0	0	0	0	0	0	0	0	0	0	0	0	0	0	0	0	0	0	0	0	0	0	0	0	0	0	0	0	0	0	0
Acinetobacter_nosocomialis	0	0	0.00299401	0	0.000534093	0	0	0	0	0.00172502	0	0	0	0	4.2996e-05	0	0.00107991	0	0.00546448	4.3018e-06	0	0	0	0	0	0	0	0	0	0.00105857	0.0417103	0	0	0	0.00236178	0	0	0	0.000675105	0	0.000924214	0	0	0	0.016129	0	0	0	0.00115679
Acinetobacter_oleivorans	0	0	0	0	0.000267046	0	0	0	0	0	0	0	0	1.95191e-05	0	0	0	0	0	0	0	0	0	0	0	0	0	0	0	0	3.65453e-05	0	0	0	0	0	0	0	0	0	0	0	0	0	0	0	0	0	0
Acinetobacter_parvus	0	0	0	0.0168067	0	0.000615536	0.000298775	0	0	0.000958344	0	0	0	0	0	0	0	0	0	0	0	0	0	0	0	0	0	0	0	0.00211715	0.00196126	0	0	0	0.00107354	0	0	0	0.00185654	0	0	0	8.54513e-05	0	0	0	0	0	5.57491e-05
Acinetobacter_pittii	0	0	0.00299401	0	0	0.00123107	0.000448163	0	0	0.00191669	0	0	0	0	0	0	0	0	0	8.60359e-06	0.00104712	0	0	0	0	0	0	0	0	0.00105857	0.0498721	0.00162	0.000647459	4.8534e-06	0	0.00300752	0	0	0.00270042	0	0	0	0	0.000133191	0	0	0	0	0.00390244
Acinetobacter_populi	0	0	0	0	0	0	0	0	0	0	0	0	0	0	0	0	0	0	0	0	0	0	0	0	0	0	0	0	0	0	0	0	0	0	0	0	0	0	0	0	0	0	0	0	0	0	0	0	0
Acinetobacter_proteolyticus	0	0	0	0	0	0	0	0	0	0.00287503	0	0	0	0	0	1.3294e-05	0	0	0	0	0	0	0	0	0	0	0	0	0	0	0.000925813	0	0	0	0.000214707	0	0	0	0	0	0	0	0	0	0	0	0	0	0.00030662
Acinetobacter_radioresistens	0	0	0	0	0	0.000246214	0.0023902	0	0	0.000511117	0	0	0	0	0	0	0	0	0	0	0	0	0	0	0	0	0	0	0	0.00141143	0.0131076	0	0	0	0.000644122	0.00300752	0	0	0.000506329	0	0.000924214	0	2.44147e-05	0	0	0	0	0	0.00030662
Acinetobacter_schindleri	0	0	0.00299401	0	0.000534093	0.000492429	0	0	0.00276625	0.00217225	0.000260451	0	0	1.95191e-05	0	0	0	0	0	0	0.00104712	0.000112549	0	0	0	0	0	0	0	0.00105857	0.0289317	3.56043e-05	0	0	0.00236178	0	0	0	0.00118143	0	0	0	8.54513e-05	0	0	0	0	0.000518941	0.00314983
Acinetobacter_seifertii	0	0	0	0	0.00106819	0	0	0	0	0	0	0	0	0	0	0	0	0	0	4.3018e-06	0	0	0	0	0	0	0	0	0	0	3.65453e-05	0	0	0	0	0	0	0	0	0	0	0	0	0	0	0	0	0	5.57491e-05
Acinetobacter_soli	0	0	0	0	0	0.000615536	0	0	0	0.000894454	0.000130225	0	0	0	0	0	0	0	0	0	0	0	0	0	0	0	0	0	0.000107724	0.000705716	0.000316726	0	0	0	0.000644122	0	0	0	0	0	0	0	0	0	0	0	0	0	0.000250871
Acinetobacter_ursingii	0	0	0	0	0	0.00418565	0	0.00914077	0	0.00396116	0	0	0	0	0	0	0	0	0	0	0	0	0	0	0	0.00055991	0.000107253	0	0	0	0	0	0.000647459	0	0	0	0	0	0	0	0	0	0	0	0	0	0	0	0.0029547
Acremonium_chrysogenum	0	0	0	0	0	0	0	0	0	0	0	0	0	0	0	0	0	0	0	0	0	0	0	0	0	0	0	0	0	0	0	0	0	0	0	0	0	0	0	0	0	0	0	0	0	0	0	0	0
Acremonium_furcatum	0	0	0	0	0	0	0	0	0	0	0	0	0	0	0	0	0	0	0	0	0	0	0	0	0	0	0	0	0	0	0	0	0	0	0	0	0	0	0	0	0	0	0	0	0	0	0	0	0
Actibacterium_atlanticum	0	0	0	0	0	0	0	0	0	0	0	0	0	0	0	0	0	0	0	0	0	0	0	0	0	0	0	0	0	0	0	0	0	0	0	0	0	0	0	0	0	0	0	0	0	0	0	0	0
Actibacterium_mucosum	0	0	0	0	0	0	0	0	0	0	0	0	0	0	0	0	0	0	0	0	0	0	0	0	0	0	0	0	0	0	0	0	0	0	0	0	0	0	0.000337553	0	0	0	0	0	0	0	0	0	0
Actinoalloteichus_cyanogriseus	0	0	0	0	0	0	0	0	0	0	0	0	0	0	0	0	0	0	0	0	0	0	0	0	0	0	0	0	0	0	0	0	0	0	0	0	0	0	0	0	0	0	0	0	0	0	0	0	0
Actinoalloteichus_hymeniacidonis	0	0	0	0	0	0	0	0	0	0	0	0	0	0	0	0	0	0	0	0	0	0	0	0	0	0	0	0	0	0	0	0	0	0	0	0	0	0	0	0	0	0	0	0	0	0	0	0	0
Actinobacillus_pleuropneumoniae	0	0	0	0	0	0	0	0	0	0	0	0	0	0	0	0	0	0	0	0	0	0	0	0	0	0	0	0	0	0	0	0	0	0	0	0	0	0	0	0	0	0	0	0	0	0	0	0	0
Actinobacillus_ureae	0	0	0	0	0	0	0	0	0	0	0	0	0	0	0	0	0	0	0	0	0	0	0	0	0	0	0	0	0.000107724	0	0	0	0	0	0	0	0	0	0	0	0	0	0	0	0	0	0	0	0
Actinobaculum_massiliense	0	0	0	0	0	0	0	0	0	0	0	0	0	0	0	0	0	0	0	0	0	0	0	0	0	0	0	0	0	0	0	0	0	0	0	0	0	0	0	0	0	0	0	0	0	0	0	0	0
Actinobaculum_suis	0	0	0	0	0	0	0	0	0	0	0	0	0	0	0	0	0	0	0	8.60359e-06	0	0	0	0	0	0	0	0	0	0	0	0	0	0	0	0	0	0	0	0	0	0	0.000280769	0	0	0	0	0	0
Actinokineospora_bangkokensis	0	0	0	0	0	0	0.000298775	0	0	0	0	0	0	0	0	0	0	0	0	0	0	0	0	0	0	0	0	0	0	0	0	0	0	0	0	0	0	0	0	0	0	0	0	0	0	0	0	0	0
Actinomadura_flavalba	0	0	0	0	0	0	0	0	0	0	0	0	0	0	0	0	0	0	0	0	0	0	0	0	0	0	0	0	0	0	0	0	0	0	0	0	0	0	0	0	0	0	0	0	0	0	0	0	0
Actinomadura_macra	0	0	0	0	0	0	0	0	0	0	0	0	0	0	0	0	0	0	0	0	0	0	0	0	0	0	0	0	0	0	0	0	0	0	0	0	0	0	0	0	0	0	0	0	0	0	0	0	0
Actinomadura_madurae	0	0	0	0	0	0	0	0	0	0	0	0	0	0	0	0	0	0	0	0	0	0	0	0	0	0	0	0	0	0	0	0	0	0	0	0	0	0	0	0	0	0	0	0	0	0	0	0	0
Actinomadura_mexicana	0	0	0	0	0	0	0	0	0	0	0	0	0	0	0	0	0	0	0	0	0	0	0	0	0	0	0	0	0	0	0	0	0	0	0	0	0	0	0	0	0	0	0	0	0	0	0	0	0
Actinomyces_coleocanis	0	0	0	0	0	0	0	0	0	0	0	0	0	0	0	0	0	0	0	0	0	0	0	0	0	0	0	0	0	0	2.43635e-05	0	0	0	0	0	0	0	0	0	0	0	0	0	0	0	0	0	0
Actinomyces_dentalis	0	0.000116259	0.00299401	0	0.000178031	0.000492429	0	0	0	0.000766675	0.000781352	0	1.68101e-05	0	0	0.000106352	0.00215983	0	0.00546448	0.000722702	0	0	0	0	0	0	0.000643518	0.000161216	0.00517074	0.00352858	3.65453e-05	0.000160219	0.00194238	0	0.00085883	0	0.00164474	0	0.00185654	0.000799543	0	0	0	0	0	2.95718e-05	0	0	0.000111498
Actinomyces_denticolens	0	0.000116259	0	0	0	0	0.000298775	0	0	0	0	0	0	0	0	0	0.00107991	0	0	0	0	0	0	0	0	0	0	0	0	0	2.43635e-05	0	0	0	0	0	0	0	0	0	0	0	2.44147e-05	0	0	0	0.000554324	0	0
Actinomyces_europaeus	0	0	0	0	0	0	0	0	0	0	0	0	0	0	0	0	0	0	0	4.3018e-06	0	0	0	0	0	0	0	0	0	0	0	0	0	0	0	0	0	0	0	0	0	0	0	0	0	0	0	0	0
Actinomyces_georgiae	0	0.000523165	0	0	0	0	0	0	0	0	0	0	0	1.95191e-05	0	3.98819e-05	0	0	0	0	0	0	0	0	0	0	5.36265e-05	0	0.000107724	0	0.000438543	0	0	9.70681e-06	0	0	0	0	0	0.000456882	0	0	0	0	0	4.43577e-05	0.000554324	0	0
Actinomyces_gerencseriae	0	0	0	0	0	0	0	0	0	0.000127779	0	0	0	0	0	0	0.00107991	0	0	0	0	0	0.043956	0	0	0	0.000187693	1.15154e-05	0.00764839	0	2.43635e-05	3.56043e-05	0	9.70681e-06	0	0	0	0	0	0.000228441	0	0	0	0.000133191	0	1.47859e-05	0.000554324	0	0
Actinomyces_graevenitzii	0	0.00110446	0	0	0	0	0	0.00548446	0.00276625	0.000255558	0	0	0	3.90381e-05	0	0	0.00107991	0	0	0	0	0	0.021978	0.00442087	0	0.00055991	0.00453144	0.00135882	0	0	0.0011329	0	0	4.12539e-05	0.000644122	0	0	0.000824063	0	0.0410051	0	0	0	0.000133191	0	0.000192217	0.00110865	0	5.57491e-05
Actinomyces_hongkongensis	0	0.000697553	0	0	0	0	0	0	0	0	0	0	0	1.95191e-05	0	5.31759e-05	0	0	0	4.3018e-06	0	0	0	0	0	0	5.36265e-05	0	0.000107724	0	0.000864904	0	0	1.45602e-05	0	0	0	0	0	0.000456882	0	0	0	0.000133191	0	5.17507e-05	0.00166297	0	0
Actinomyces_israelii	0	0	0	0	0	0	0	0	0	0	0	0	0	0	0	1.3294e-05	0	0	0	4.3018e-06	0	0	0	0	0	0	0	0	0	0	0	0	0	0	0	0	0	0	0	0	0	0	0	0	0	0	0	0	0
Actinomyces_johnsonii	0	0	0.00299401	0	0	0	0	0	0	0.000127779	0	0	0	0	0	1.3294e-05	0.00107991	0	0	0	0	0	0	0	0	0	0	0	0.000377033	0	9.7454e-05	0	0	0	0	0	0	0	0	0.00011422	0	0	0	0	0	0	0	0	0
Actinomyces_massiliensis	0	0	0	0	0	0.000492429	0	0	0	0.000638896	0	0	0	0	0	6.64699e-05	0.00107991	0	0	2.1509e-05	0	0	0	0	0	0	0	1.15154e-05	0	0.00105857	2.43635e-05	0.000106813	0	0	0.0107354	0	0	0	0.000337553	0.00011422	0.000924214	0	0	0	0	0	0	0	0
Actinomyces_meyeri	0	0.00528978	0	0	0	0	0.000298775	0	0	0	0.000260451	0	0	0.000351343	0	0	0.00107991	0	0	8.60359e-06	0	0	0	0	0	0	0.000643518	1.15154e-05	0.000107724	0	0.00730905	3.56043e-05	0	0.000131042	0	0	0	0	0.000337553	0.00239863	0	0	0	0.0014651	0	0.00037704	0.00997783	0	0
Actinomyces_naeslundii	0	0	0	0	0	0	0	0	0	0.00364171	0	0	0	0	0	0.000159528	0.0172786	0	0.00546448	2.58108e-05	0	0.000112549	0	0.00132626	0	0	0	1.15154e-05	0	0.00494001	0.00192472	0.000106813	0.00226611	7.2801e-06	0.000429415	0	0	0	0.00185654	0	0	0	2.44147e-05	0	0	0	0.00110865	0	0
Actinomyces_nasicola	0	0	0	0	0.000178031	0	0.000298775	0	0	0	0	0	0	0	0	1.3294e-05	0	0	0	0	0	0	0	0	0	0	0	0	0	0	0	0	0	0	0	0	0	0	0	0	0	0	0	0	0	0	0	0	0.000111498
Actinomyces_neuii	0	0	0	0	0	0	0	0	0	0	0	0	0	0	0	0	0	0	0	0	0	0.000225098	0	0	0	0	0	0	0	0	0	0	0	0	0	0	0	0	0	0	0	0	0	0	0	0	0	0	0
Actinomyces_odontolytica	0	0	0	0	0	0	0	0	0	0	0	0	0	0	0	0	0	0	0	0	0	0	0	0.00530504	0	0	0	0	0	0	0	0	0	0	0	0	0	0	0	0	0	0	0	0	0	0	0	0	0
Actinomyces_oris	0	0.000116259	0	0	0	0.000492429	0.000298775	0	0	0.00146946	0.000130225	0	0	3.90381e-05	4.2996e-05	0.000119646	0.106911	0	0	0	0	0.000112549	0.0549451	0.000884173	0	0	0	0	0	0.00105857	0.0192593	8.90107e-05	0.00194238	3.15471e-05	0.00085883	0	0	0	0.00101266	0	0.00231054	0	8.54513e-05	0	0	0	0	0	5.57491e-05
Actinomyces_polynesiensis	0	0	0	0	0	0	0	0	0	0	0	0	0	0	0	0	0	0	0	4.3018e-06	0	0	0	0	0	0	0	0	0	0	6.09088e-05	0	0	4.8534e-06	0	0	0	0	0	0	0	0	0	0	0	0	0.000554324	0	0
Actinomyces_provencensis	0	0	0	0	0.000178031	0.000492429	0	0	0	0.000127779	0	0	0	0	0	1.3294e-05	0	0	0	8.60359e-06	0	0	0	0	0	0	0	0	0	0	7.30905e-05	0	0	0	0	0	0	0	0	0.00011422	0	0	0.000146488	0	0	0	0	0	5.57491e-05
Actinomyces_radicidentis	0	0	0	0	0	0	0.000448163	0	0	0	0	0	0	0	0	2.6588e-05	0	0	0	4.3018e-06	0	0	0	0	0	0	0	0	0.000538619	0	2.43635e-05	0	0	0	0.00085883	0	0	0	0.000337553	0	0	0	0	0	0	0	0	0	0
Actinomyces_radingae	0	0	0	0	0	0.000246214	0	0	0	0	0	0	0	0	0	0	0	0	0	0	0	0	0	0	0	0	0	0	0	0	0	0	0	0	0	0	0	0	0	0	0	0	0	0.000199787	0	0	0	0	0
Actinomyces_ruminicola	0	0	0	0	0	0	0	0	0	0	0	0	0	0	0	0	0	0	0	0	0	0	0	0	0	0	0	0	0	0	0	0	0	0	0	0	0	0	0	0	0	0	0	0	0	0	0	0	0
Actinomyces_timonensis	0	0	0	0	0	0	0	0	0	0	0	0	0	0	0	0	0	0	0	0	0	0	0	0	0	0	0.000294946	0	0	0	0.000133999	0	0	0	0.000214707	0	0	0	0.000337553	0	0	0	0	0	0	0	0	0	0
Actinomyces_turicensis	0	0	0	0	0	0	0	0	0	0	0	0	0	0	0	6.64699e-05	0	0	0	1.29054e-05	0	0	0	0	0	0	0	0	0.000107724	0	0.000548179	0	0	3.64005e-05	0	0	0	0	0	0	0	0	0	0.000199787	0	1.47859e-05	0	0	0
Actinomyces_urinae	0	0	0	0	0	0	0	0	0	0	0	0	0	0	0	3.98819e-05	0	0	0	0	0	0	0	0	0	0	0	0	0	0	0.000146181	0	0	0	0	0	0	0	0	0.000342661	0	0	0	0.000399574	0	1.47859e-05	0	0	0
Actinomyces_urogenitalis	0	0	0	0	0	0	0	0	0	0.000127779	0	0	0	0	0	2.6588e-05	0	0	0	0	0	0	0	0	0	0	0	0	0	0	0	0	0	0	0	0	0	0	0	0	0	0	0	0	0	1.47859e-05	0.000554324	0	0
Actinomyces_viscosus	0	0	0	0	0	0	0	0	0	0	0	0	0	0	0	1.3294e-05	0.00215983	0	0	0	0	0	0	0	0	0	0	0	0.000215448	0	0.000243635	0	0	4.8534e-06	0	0	0	0	0	0.00011422	0	0	0	0	0	0	0	0	0
Actinomyces_vulturis	0	0	0	0	0	0	0	0	0	0	0	0	0	0	0	0	0	0	0	0	0	0	0	0	0	0	0	0	0	0	0	0	0	0	0	0	0	0	0	0	0	0	0	0	0	0	0	0	0
Actinomycetospora_chiangmaiensis	0	0	0	0	0	0	0	0.00548446	0	0.000127779	0	0	0	0	0	0	0	0	0	4.3018e-06	0	0	0	0	0	0	0	0	0	0.000705716	0	0	0	0	0	0	0	0	0	0	0	0	0	0	0	0	0	0	0
Actinophytocola_xanthii	0	0	0	0	0	0	0	0	0	0	0	0	0	0	0	0	0	0	0	0	0	0	0	0	0	0	0	0	0	0	0	0	0	0	0	0	0	0	0	0	0	0	0	0	0	0	0	0	0
Actinoplanes_globisporus	0	0	0	0	0	0	0	0	0	0	0	0	0	0	0	0	0	0	0	0	0	0	0	0	0	0	0	0	0	0	0	0	0	0	0	0	0	0	0	0	0	0	0	0	0	0	0	0	0
Actinoplanes_philippinensis	0	0	0	0	0	0	0	0	0	0	0	0	0	0	0	0	0	0	0	0	0	0	0	0	0	0	0	0	0	0	0	0	0	0	0	0	0	0	0	0	0	0	0	0	0	0	0	0	0
Actinopolyspora_halophila	0	0	0	0	0	0	0	0	0	0.000127779	0	0	0	0	0	0	0	0	0	0	0	0	0	0	0	0	0	0	0	0	0	0	0	0	0	0	0	0	0	0	0	0	0	0	0	0	0	0	0
Actinopolyspora_mortivallis	0	0	0	0	0	0	0	0	0	0	0	0	0	0	0	0	0	0	0	0	0	0	0	0	0	0	0	0	0	0	0	0	0	0	0	0	0	0	0.000337553	0	0	0	0	0	0	0	0	0	0
Actinospica_robiniae	0	0	0	0	0	0	0	0	0	0	0	0	0	0	0	0	0	0	0	0	0	0	0	0	0	0	0	0	0	0	0	0	0	0	0	0	0	0	0	0	0	0	2.44147e-05	0	0	0	0	0	0
Actinosynnema_mirum	0	0	0	0	0	0	0	0	0	0	0	0	0	0	0	0	0	0	0	0	0	0	0	0	0	0	0	0	0	0	0	0	0	0	0	0	0	0	0.000337553	0	0	0	0	0	0	0	0	0	0
Actinotalea_ferrariae	0	0	0	0	0	0	0	0	0	0	0	0	0	0	0	0	0	0	0	4.3018e-06	0	0	0	0	0	0	0	0	0	0	0	0	0	0	0	0	0	0	0.000337553	0	0	0	0	0	0	0	0	0	0
Actinotignum_urinale	0	0	0	0	0	0	0	0	0	0	0	0	0	0	0	0	0	0	0	0	0	0	0	0	0	0	0	0	0	0	0	0	0	0	0	0	0	0	0	0	0	0	0	0	0	0	0	0	0
Acutalibacter_muris	0	0	0	0	0	0	0	0	0	0	0	0	0	0	0	0	0	0	0	0	0	0	0	0	0	0	0	0	0	0	0	0	0	0	0	0	0	0	0	0	0	0	0	0	0	0	0	0	0
Acuticoccus_yangtzensis	0	0	0	0.0168067	0	0	0	0	0	0	0	0	0	0	0	0	0	0	0	0	0	0	0	0	0	0	0	0	0	0.000705716	0	0	0	0	0	0	0	0	0	0	0	0	0	0	0	0	0	0	0
Adlercreutzia_equolifaciens	0	0	0	0	0	0	0	0	0	0	0	0	0	0	0	0	0	0	0	0	0	0	0	0	0	0	0	0	0	0.000705716	0	0	0	0	0	0	0	0	0.00270042	0	0	0	0	0	0	0	0	0	0
Advenella_kashmirensis	0	0	0	0	0	0	0	0	0	0	0	0	0	0	0	0	0	0	0	0	0	0	0	0	0	0	0	0	0	0	0	0	0	0	0	0	0	0	0	0	0	0	0	0	0	0	0	0	0
Advenella_mimigardefordensis	0	0	0	0	0	0	0	0	0	0	0	0	0	0	0	0	0	0	0	0	0	0	0	0	0	0	0	0	0	0	0	0	0	0	0	0	0	0	0	0	0	0	0	0	0	0	0	0	0
Aequorivita_viscosa	0	0	0	0	0	0	0	0	0	0.000127779	0	0	0	0	0	0	0	0	0	0	0	0	0	0	0	0	0	0	0	0	0	0	0	0	0	0	0	0	0	0	0	0	0	0	0	0	0	0	0
Aequorivita_vladivostokensis	0	0	0	0	0	0	0	0	0	0	0	0	0	0	0	0	0	0	0	0	0	0	0	0	0	0	0	0	0	0	0	0	0	0	0	0	0	0	0	0	0	0	0	0	0	0	0	0	0
Aeribacillus_pallidus	0	0	0	0	0	0	0	0.00548446	0	0.000255558	0.000130225	0	0	0	0	0	0.00107991	0	0	0	0.00732984	0	0	0	0	0	0	0	0	0	2.43635e-05	0	0	0	0	0	0	0	0	0	0	0	2.44147e-05	0	0	0	0	0.000518941	0.000250871
Aerococcus_christensenii	0	0	0	0	0	0	0	0	0	0	0	0	0	0	0	0	0	0	0	0	0	0	0	0	0	0	0	0	0	0	0	0	0	0	0	0	0	0	0	0	0	0	0	0	0	0	0	0	0
Aerococcus_suis	0	0	0	0	0	0	0	0	0	0	0	0	0	0	0	0	0	0	0	0	0	0	0	0	0	0	0	0	0	0	0	0	0	0	0	0	0	0	0	0	0	0	0	0	0	0	0	0	0
Aerococcus_urinae	0	0	0	0	0	0	0	0	0	0	0	0	0	0	0	0	0	0	0	0	0	0	0	0	0	0	0	0	0	0.00105857	0	0	0	0	0	0	0	0	0.000337553	0	0	0	0	0	0	0	0	0	0
Aerococcus_viridans	0	0	0	0	0.000178031	0.000615536	0.000298775	0	0.00829876	0.00159724	0	0	0	7.80762e-05	4.2996e-05	0	0	0	0	0	0	0	0	0	0	0	0	0	0	0.00105857	0	3.56043e-05	0	0	0	0.00300752	0	0	0.00135021	0	0	0	0.000122073	0	0	0	0.00110865	0	0.000655052
Aeromicrobium_choanae	0	0	0	0	0	0	0.000298775	0	0	0	0	0	0	0	0	0	0	0	0	0	0	0	0	0	0	0	0	0	0	0	0	0	0	0	0	0	0	0	0	0	0	0	2.44147e-05	0	0	0	0	0	0
Aeromicrobium_marinum	0	0	0	0	0	0	0	0	0	0	0	0	0	0	0	0	0	0	0	0	0	0	0	0	0	0	0	0	0	0.000705716	0	0	0	0	0	0	0	0	0	0	0	0	0	0	0	0	0	0	0
Aeromicrobium_massiliense	0	0	0	0	0	0	0	0	0	0.000127779	0	0	0	0	0	0	0	0	0	0	0	0	0	0	0	0	0	0	0	0	0	0	0	0	0	0	0	0	0	0	0	0	0	0	0	0	0	0	0
Aeromonas_caviae	0	0	0	0	0	0.000246214	0	0	0	0.00255558	0	0	1.68101e-05	1.95191e-05	0	0	0.00107991	0	0	0	0.00314136	0	0	0	0	0	0	0	0	0.00105857	0	0	0	0	0.00161031	0	0	0	0.00202532	0	0	0	2.44147e-05	0	0	0	0.000554324	0	0.000111498
Aeromonas_dhakensis	0	0	0	0	0	0	0	0	0	0	0	0	0	0	4.2996e-05	0	0	0	0	0	0	0	0	0	0	0	0	0	0	0	0	0	0	0	0.000214707	0	0	0	0	0	0	0	0	0	0	0	0	0	0
Aeromonas_hydrophila	0	0	0	0	0	0	0	0	0	0	0	0	0	0	0	0	0	0	0	0	0	0	0	0	0	0	0	0	0	0	0	0	0	0	0	0	0	0	0.000337553	0	0	0	0	0	0	0	0	0	0
Aeromonas_media	0	0	0	0	0	0	0	0	0	0.000127779	0	0	0	0	0	0	0	0	0	0	0	0	0	0	0	0	0	0	0	0.00105857	0	0	0	0	0.000429415	0	0	0	0	0	0	0	0	0	0	0	0	0	0.00030662
Aeromonas_salmonicida	0	0	0.00299401	0	0	0	0	0	0	0	0	0	0	0	0	0	0	0	0	0	0	0	0	0	0	0	0	0	0	0.00211715	0	0	0	0	0.000429415	0	0	0	0	0	0	0	0	0	0	0	0	0	0.000111498
Aeromonas_simiae	0	0	0	0	0	0	0	0	0	0	0	0	0	0	0	0	0	0	0	0	0	0	0	0	0	0	0	0	0	0	0	0	0	0	0	0	0	0	0	0	0	0	0	0	0	0	0	0	0
Aeromonas_sobria	0	0	0	0	0	0	0	0	0	0	0	0	0	0	0	0	0	0	0	0	0	0	0	0	0	0	0	0	0	0.00105857	0	0	0	0	0	0	0	0	0	0	0	0	0	0	0	0	0.000554324	0	0
Aeromonas_taiwanensis	0	0	0	0	0	0	0	0	0	0.000127779	0	0	0	0	0	0	0	0	0	0	0	0	0	0	0	0	0	0	0	0	0	0	0	0	0	0	0	0	0	0	0	0	0	0	0	0	0	0	0
Aeromonas_veronii	0	0	0	0	0	0.000246214	0	0	0	0	0	0	0	0	0	0	0	0	0	0	0	0	0	0	0	0	0	0	0	0	0	0	0	0	0.00236178	0	0	0	0	0	0	0	0	0	0	0	0	0	0.000111498
Aestuariimicrobium_kwangyangense	0	0	0	0	0	0	0	0	0	0.000127779	0	0	0	0	0	0	0	0	0	0	0	0	0	0	0	0	0	0	0	0	0	0	0	0	0	0	0	0	0	0	0	0	2.44147e-05	0	0	0	0	0	0
Aestuariivita_atlantica	0	0	0	0	0	0	0	0	0	0	0	0	0	0	0	0	0	0	0	0	0	0	0	0	0	0	0	0	0	0	0	0	0	0	0	0	0	0	0	0	0	0	0	0	0	0	0	0	0
Afifella_marina	0	0	0	0	0	0	0	0	0	0	0	0	0	0	0	0	0	0	0	0	0	0	0	0	0	0	0	0	0	0	0	0	0	0	0	0	0	0	0	0	0	0	0	0	0	0	0	0	0
Afipia_birgiae	0	0	0	0	0	0.000492429	0.000298775	0	0	0.000255558	0	0	0	1.95191e-05	0	0	0	0	0	0	0	0	0	0	0	0	0	0	0	0.00247001	0	0	0	0	0	0	0	0	0	0	0	0	0	0	0	0	0.000554324	0	0
Afipia_felis	0	0	0	0	0	0	0	0	0	0	0	0	0	0	0	0	0	0	0	0	0	0	0	0	0	0	0	0	0	0.00105857	0	0	0	0	0	0	0	0	0.000337553	0	0	0	0	0	0	0	0	0	0
African_swine_fever_virus	0	0	0	0	0	0	0	0	0	0	0	0	0	0	0	0	0	0	0	0	0	0	0	0	0	0	0	0	0	0	0	0	0	0	0	0	0	0	0	0	0	0	2.44147e-05	0	0	0	0	0	0
Agathobaculum_desmolans	0	0	0	0	0	0	0	0	0	0	0.000130225	0	0	0	0	0	0	0	0	4.3018e-06	0	0	0	0	0	0	0	0	0	0	0	0	0	4.8534e-06	0	0	0	0	0	0	0	0	0	0	0	0	0	0	0
Aggregatibacter_actinomycetemcomitans	0	0	0	0	0	0	0	0	0	0	0	0	0	0	0	3.98819e-05	0	0	0	0	0	0	0	0	0	0	0	0	0.000807928	0	0	0	0	0	0	0	0	0	0	0	0	0	0	0	0	0	0	0	0
Aggregatibacter_aphrophilus	0.00118906	0	0	0	0	0	0	0	0	0.000127779	0	0	0	0	0	0.000491877	0	0	0	0	0	0	0	0	0	0	0	0	0	0	0	0	0	4.12539e-05	0	0	0	0	0	0	0	0	2.44147e-05	0	0	1.47859e-05	0	0	0
Aggregatibacter_segnis	0	0	0	0	0	0.000246214	0.000298775	0	0	0.000255558	0	0	0	1.95191e-05	4.2996e-05	0.00768392	0	0	0.010929	4.3018e-06	0	0	0	0.000884173	0	0	0	0	0	0	2.43635e-05	0	0	9.70681e-06	0.000214707	0.00451128	0	0	0	0.00011422	0	0	2.44147e-05	0.000133191	0	0	0	0	5.57491e-05
Agreia_bicolorata	0	0	0	0	0	0	0	0	0	0.000127779	0	0	0	0	0	0	0	0	0	0	0	0	0	0	0	0	0	0	0	0.00105857	0	0	0	0	0	0	0	0	0.000337553	0	0	0	0	0	0	0	0	0	5.57491e-05
Agrobacterium_albertimagni	0	0	0	0	0	0	0	0	0	0	0	0	0	0	0	0	0	0	0	0	0	0	0	0	0	0	0	0	0	0	0	0	0	0	0.000214707	0	0.00328947	0	0	0	0	0	0	0	0	0	0	0	0
Agrobacterium_fabrum	0	0	0	0	0	0.000861751	0.000298775	0	0	0.000511117	0	0	0	0	0	0	0	0	0	8.60359e-06	0	0	0	0	0	0	0	0	0	0	2.43635e-05	3.56043e-05	0	0	0.00118089	0	0	0	0	0	0	0	0	0	0	0	0	0	0
Agrobacterium_tumefaciens	0	0	0	0	0	0.000492429	0.000448163	0	0	0.000255558	0	0	0	5.85572e-05	0	0	0	0	0	4.3018e-06	0	0	0	0	0	0	0	0	0	0	3.65453e-05	0	0	0	0	0	0	0	0.00270042	0	0	0	0	0	0	0	0	0	5.57491e-05
Agrobacterium_vitis	0	0	0	0	0	0.000492429	0	0	0	0	0	0	0	0	4.2996e-05	0	0	0	0	0	0	0	0	0	0	0	0	0	0	0	0	0	0	0	0.000429415	0	0	0	0	0	0	0	0	0	0	0	0	0	0
Agrococcus_baldri	0	0	0	0	0	0	0.000298775	0	0	0	0	0	0	0	0	1.3294e-05	0	0	0	0	0	0	0	0	0	0	0	0	0	0	0	0	0	0	0	0	0	0	0	0	0	0	2.44147e-05	0	0	0	0	0	0
Agrococcus_jejuensis	0	0	0	0	0	0.000246214	0.00059755	0	0	0.000127779	0	0	0	0	0	0	0	0	0	4.3018e-06	0	0	0	0	0	0	0	0	0	0.000705716	0	0	0	0	0	0	0	0	0	0	0	0	0.000354013	0	0	0	0	0	5.57491e-05
Agromyces_aureus	0	0	0	0	0	0	0	0	0	0.000127779	0	0	0	0	0	0	0	0	0	0	0	0	0	0	0	0	0	0	0	0	0	0	0	0	0	0	0	0	0.000337553	0	0	0	0	0	0	0	0	0	0
Agromyces_cerinus	0	0	0	0	0	0	0	0	0	0	0	0	0	0	0	0	0	0	0	0	0	0	0	0	0	0	0	0	0	0	0	0	0	0	0	0	0	0	0	0	0	0	0	0	0	0	0	0	0
Akkermansia_muciniphila	0	0	0	0	0	0.000615536	0.000298775	0	0	0.000894454	0	0	0	0	0	0	0	0	0	0	0	0.000112549	0	0	0	0	0	1.15154e-05	0	0.00176429	0	3.56043e-05	0	0	0.0013956	0	0.00164474	0	0	0	0	0	0	0	0	0	0	0	0.000501742
Albidovulum_xiamenense	0	0	0	0	0	0	0	0	0	0	0	0	0	0	0	0	0	0	0	0	0.00104712	0	0	0	0	0	0	0	0	0	0	0	0	0	0	0	0	0	0.000506329	0	0	0	0	0	0	0	0	0	0
Albimonas_donghaensis	0	0	0	0	0	0	0	0	0	0	0	0	0	0	0	0	0	0	0	0	0	0	0	0	0	0	0	0	0	0	0	0	0	0	0	0	0	0	0	0	0	0	0	0	0	0	0	0	5.57491e-05
Alcaligenes_faecalis	0	0	0	0	0	0.000492429	0	0	0	0.00230003	0	0	0	1.95191e-05	0	0	0	0	0	0	0.0104712	0	0	0	0	0	0	0	0	0.00105857	0	0	0	0	0.000429415	0	0	0	0	0	0	0	0	0	0	1.47859e-05	0	0	5.57491e-05
Alcanivorax_dieselolei	0	0	0	0	0	0	0	0	0	0	0	0	0	0	0	0	0	0	0	0	0	0	0	0	0	0	0	0	0	0	0	0	0	0	0	0	0	0	0	0	0	0	0	0	0	0	0	0	0
Alcanivorax_hongdengensis	0	0	0	0.0168067	0	0	0	0	0	0	0	0	0	0	0	0	0.00107991	0	0.00546448	0	0	0.000112549	0	0	0	0	0	0	0	0	0	0	0	0	0	0	0	0	0	0	0	0	2.44147e-05	0	0	0	0	0	0
Algiphilus_aromaticivorans	0	0	0	0	0	0	0	0	0	0	0	0	0	0	0	0	0	0	0	0	0	0	0	0	0	0	0	0	0	0	0	0	0	0	0	0	0	0	0	0	0	0	2.44147e-05	0	0	0	0	0	5.57491e-05
Algoriella_xinjiangensis	0	0	0	0	0	0	0	0.00548446	0	0.000255558	0	0	0	1.95191e-05	0	0	0	0	0	0	0.00104712	0	0	0	0	0	0	0	0	0	0	0	0	0	0	0	0	0	0	0	0	0	0	0	0	0	0	0	0
Algoriphagus_antarcticus	0	0	0	0	0	0	0	0	0	0	0	0	0	0	0	0	0	0	0	0	0	0	0	0	0	0	0	0	0	0	0	0	0	0	0	0	0	0	0	0	0	0	0	0	0	0	0	0	0
Alicycliphilus_denitrificans	0	0	0	0	0.000178031	0.000492429	0.000298775	0	0	0.000383338	0	0	0	0	0	0	0.00107991	0	0	0	0.150785	0.000112549	0	0	0	0	0	0	0	0	0	0	0	0	0.000644122	0	0	0	0.00202532	0	0	0	2.44147e-05	0	0	0	0	0	0.000111498
Alicyclobacillus_acidocaldarius	0	0	0	0	0	0	0	0	0	0	0	0	0	0	0	0	0	0	0	0	0	0	0	0	0	0	0	0	0	0	0	0	0	0	0	0	0	0	0	0	0	0	0	0	0	0	0	0	0
Alicyclobacillus_contaminans	0	0	0	0	0	0	0	0	0	0	0	0	0	0	0	0	0	0	0	0	0	0	0	0	0	0	0	0	0	0	0	0	0	0	0	0	0	0	0	0	0	0	0	0	0	0	0	0	0
Aliicoccus_persicus	0	0	0	0	0	0	0	0	0	0.000383338	0.000260451	0	0	1.95191e-05	0	2.6588e-05	0	0	0	0	0	0	0	0	0	0	0	0	0	0	0	0	0	0	0	0	0	0	0.000506329	0	0	0	2.44147e-05	0	0	0	0	0	0.000404181
Aliiglaciecola_lipolytica	0	0	0	0	0	0	0	0	0	0	0	0	0	0	0	0	0	0	0	0	0	0	0	0	0	0	0	0	0	0	0	0	0	0	0	0	0	0	0	0	0	0	0	0	0	0	0	0	0
Alishewanella_agri	0	0	0	0.0168067	0	0	0	0.00548446	0.00276625	0.000511117	0	0	0	0	0	0	0	0	0	0	0	0.000112549	0	0	0	0	0	0	0	0.000705716	0	0.000178021	0	0	0.000644122	0	0	0	0.00118143	0	0	0.0118577	0	0	0	0	0	0	0.00185366
Alistipes_finegoldii	0	0	0	0	0	0.000492429	0	0	0	0	0	0	0	0	0	0	0	0	0	0	0	0	0	0	0	0	0	0	0.000107724	0	0	0	0	0	0	0	0	0	0	0	0	0	0	0	0	0	0	0	0
Alistipes_indistinctus	0	0	0	0	0	0	0	0	0	0	0	0	0	0	0	0	0	0	0	0	0	0	0	0	0	0	0	0	0.000107724	0	0	0	0	0	0	0	0	0	0	0	0	0	0	0	0	0	0	0	0
Alistipes_inops	0	0	0	0	0	0	0	0	0	0	0	0	0	0	0	0	0	0	0	0	0	0	0	0	0	0	0	0	0	0.00105857	0	0	0	0	0	0	0	0	0	0	0	0	0	0	0	0	0	0	0
Alistipes_obesi	0	0	0	0	0	0	0.000298775	0	0	0	0	0	0	0	0	0	0	0	0	0	0	0	0	0	0	0	0	0	0	0	0	0	0	0	0	0	0	0	0	0	0	0	0	0.000133191	0	0	0	0	0
Alistipes_putredinis	0	0	0	0	0	0.000246214	0.000298775	0	0	0.000255558	0	0	0	0	0	0	0	0	0	0	0	0	0	0	0	0	0	0	0	0.00141143	2.43635e-05	0	0	4.8534e-06	0	0	0	0	0	0	0	0	0	0	0	0	0	0	0.000250871
Alistipes_senegalensis	0	0	0	0	0	0	0	0	0	0.000127779	0	0	0	0	0	0	0	0	0	0	0	0	0	0	0	0	0	0	0	0	0	0	0	0	0	0	0	0	0	0	0	0	0	0	0	0	0	0	0
Alistipes_shahii	0	0	0	0	0	0.000246214	0	0	0	0.000255558	0	0	0	0	0	0	0	0	0	0	0	0	0	0	0	0	0	1.15154e-05	0	0.000705716	0	0	0	0	0.000214707	0	0	0	0	0	0	0	0	0	0	0	0	0	5.57491e-05
Aliterella_atlantica	0	0	0	0	0	0	0	0	0.00276625	0.000383338	0	0	0	1.95191e-05	0	0	0	0	0	0	0	0	0	0	0	0	0	0	0	0.000705716	0	0	0	0	0	0	0	0	0.000337553	0	0	0	0	0	0	0	0	0	5.57491e-05
Alkalibacillus_haloalkaliphilus	0	0	0	0	0	0	0	0	0	0	0	0	0	0	0	1.3294e-05	0	0	0	0	0	0	0	0	0	0	0	0	0	0	0	0	0	0	0	0	0	0	0	0	0	0	0	0	0	0	0	0	0
Alkalibacterium_gilvum	0	0	0	0	0	0	0	0	0	0.000127779	0	0	0	0	0	0	0	0	0	0	0	0	0	0	0	0	0	0	0	0	0	0	0	0	0	0	0	0	0	0	0	0	2.44147e-05	0	0	0	0	0	5.57491e-05
Alkaliflexus_imshenetskii	0	0	0	0	0	0	0	0	0	0	0	0	0	0	0	0	0	0	0	0	0	0	0	0	0	0	0	0	0	0	0	0	0	0	0	0	0	0	0	0	0	0	0	0	0	0	0	0	0.000111498
Alkalilimnicola_ehrlichii	0	0	0	0	0	0	0	0	0	0	0	0	0	0	0	0	0	0	0	0	0	0	0	0	0	0	0	0	0	0	0	0	0	0	0	0	0	0	0	0	0	0	0	0	0	0	0	0	0
Alkaliphilus_metalliredigens	0	0	0	0	0	0	0	0	0	0	0	0	0	0	0	0	0	0	0	0	0	0	0	0	0	0	0	0	0	0	0	0	0	0	0	0	0	0	0	0	0	0	0	0	0	0	0	0	0
Alkaliphilus_oremlandii	0	0	0	0	0	0	0	0	0	0.000383338	0	0.0175439	0	0	0	0	0	0	0	0	0	0	0	0	0	0	0	0	0	0	0	0	0	0	0	0	0	0	0	0	0	0	0	0	0	0	0	0	0
Alkanindiges_illinoisensis	0	0.000116259	0	0	0	0	0	0	0	0	0	0	0	3.90381e-05	0	0	0	0	0	0	0	0	0	0	0	0	0	0	0	0	0	0	0	0	0.000214707	0	0	0	0	0	0	0	0	0	0	0	0.00443459	0	0
Allisonella_histaminiformans	0	0	0	0	0	0	0	0	0	0	0	0	0	0	0	0	0	0	0	0	0	0	0	0	0	0	0	0	0	0	0	0	0	7.2801e-06	0	0	0	0	0	0	0	0	0	0	0	6.65366e-05	0	0	0
Alloactinosynnema_iranicum	0	0	0	0	0	0	0.000298775	0	0	0	0	0	0	0	0	0	0	0	0	0	0	0	0	0	0	0	0	0	0	0	0	0	0	0	0	0	0	0	0	0	0	0	0	0	0	0	0	0	0
Allobaculum_stercoricanis	0	0	0	0	0	0	0	0	0	0	0	0	0	0	0	0	0	0	0	4.3018e-06	0	0	0	0	0	0	0	0	0	0	0	0	0	0	0	0	0	0	0	0	0	0	0	0	0	0	0	0	0
Allochromatium_vinosum	0	0	0	0	0	0	0	0	0	0	0	0	0	0	0	0	0	0	0	0	0	0	0	0	0	0	0	0	0	0	0	0	0	0	0	0	0	0	0	0	0	0	0	0	0	0	0	0	0
Allofustis_seminis	0	0	0	0	0	0	0	0	0	0	0	0	0	0	0	0	0	0	0	0	0	0	0	0	0	0	0	0	0	0	0	0	0	0	0	0	0	0	0	0	0	0	0	0	0	0	0	0	0
Alloiococcus_otitis	0	0	0	0	0	0	0	0	0	0	0	0	0	0	0	0	0	0	0	0	0	0	0	0	0	0	0	0	0	0	0	0	0	0	0	0	0	0	0	0	0	0	0	0	0	0	0	0	0
Allokutzneria_albata	0	0	0	0	0	0	0	0	0	0	0	0	0	1.95191e-05	0	0	0	0	0	0	0	0	0	0	0	0	0	0	0	0	0	0	0	0	0	0	0	0	0	0	0	0	0	0	0	0	0	0	0
Alloprevotella_rava	0	0	0	0	0	0	0	0.00548446	0	0.000127779	0	0	0	0	0	0.000398819	0	0	0.00546448	1.29054e-05	0	0	0	0.000884173	0	0	5.36265e-05	0	0	0	0	0	0	4.8534e-06	0	0	0	0	0	0.000456882	0	0	2.44147e-05	0	0	5.17507e-05	0	0	0
Alloprevotella_tannerae	0	0	0	0	0	0.000492429	0.000298775	0.0347349	0	0.000511117	0.000130225	0	0	0	0	0.000704581	0.00107991	0	0	0.000283919	0	0	0	0.000884173	0	0.00055991	0.0276981	0	0	0	3.65453e-05	3.56043e-05	0	5.33874e-05	0.000429415	0	0	0	0.000506329	0.08498	0	0	0.000354013	0.000732552	0	0.000177431	0	0	0.000557491
Alloscardovia_omnicolens	0	0	0	0	0	0	0	0	0	0	0	0	0	0	0	2.6588e-05	0	0	0.0218579	0	0	0	0	0	0	0	0	0	0	0	0	0	0	0	0	0	0	0	0	0.00011422	0	0	0	0	0	0	0	0	5.57491e-05
Altererythrobacter_atlanticus	0	0	0	0	0	0	0.000298775	0	0	0.000255558	0	0	0	0	0	0	0	0	0	0	0	0	0	0	0	0	0	0	0	0.000705716	0	0	0	0	0	0	0	0	0	0	0	0	0	0	0	0	0	0	0
Altererythrobacter_dongtanensis	0	0	0	0	0	0	0	0	0	0.000127779	0	0	0	0	0	0	0	0	0	0	0	0	0	0	0	0	0	0	0	0.000705716	0	0	0	0	0	0	0	0	0.000337553	0	0	0	0	0	0	0	0	0	5.57491e-05
Alternaria_alternata	0	0	0	0	0	0	0	0	0	0.00466394	0	0	0	0	0	0	0	0	0	0	0	0	0	0	0	0	0	0	0	0	0	0	0	0	0	0	0	0	0.000337553	0	0	0	0	0	0	0	0	0	0
Alternaria_arborescens	0	0	0	0	0	0	0	0	0	0.000127779	0	0	0	0	0	0	0	0	0	0	0	0	0	0	0	0	0	0	0	0	0	0	0	0	0	0	0	0	0	0	0	0	0	0	0	0	0	0	0
Alternaria_brassicae	0	0	0	0	0	0	0	0	0	0	0	0	0	0	0	0	0	0	0	0	0	0	0	0	0	0	0	0	0	0.00141143	0	0	0	0	0	0	0	0	0	0	0	0	0	0	0	0	0	0	0
Alternaria_brassicicola	0	0	0	0	0	0	0	0	0	0	0	0	0	0	0	0	0	0	0	0	0	0	0	0	0	0	0	0	0	0	0	0	0	0	0	0	0	0	0	0	0	0	0	0	0	0	0	0	0
Alternaria_gaisen	0	0	0	0	0	0	0	0	0	0.000383338	0	0	0	0	0	0	0	0	0	0	0	0	0	0	0	0	0	0	0	0	0	0	0	0	0	0	0	0	0	0	0	0	0	0	0	0	0	0	0
Alternaria_solani	0	0	0	0	0	0	0	0	0	0	0	0	0	0	0	0	0	0	0	4.3018e-06	0	0	0	0	0	0	0	0	0	0	0	0	0	0	0	0	0	0	0	0	0	0	0	0	0	0	0	0	0
Alternaria_tenuissima	0	0	0	0	0	0	0	0	0	0	0	0	0	0	0	0	0	0	0	0	0	0	0	0	0	0	0	0	0	0	0	0	0	0	0	0	0	0	0	0	0	0	0	0	0	0	0	0	0
Alteromonas_macleodii	0	0	0	0	0	0	0	0	0	0	0	0	0	0	0	0	0	0	0	0	0	0	0	0	0	0	0	0	0	0	0	0	0	0	0	0	0	0	0	0	0	0	0	0	0	0	0	0	0.000209059
Amantichitinum_ursilacus	0	0	0	0	0	0	0	0	0	0	0	0	0	0	0	0	0	0	0	0	0	0	0	0	0	0	0	0	0	0	0	0	0	0	0	0	0	0	0	0	0	0	0	0	0	0	0	0	0
Aminobacter_aminovorans	0	0	0	0	0	0	0.000298775	0	0	0.000127779	0	0	0	0	0	0	0	0	0	0	0	0	0	0	0	0	0	0	0.000107724	0.00176429	0	0	0	0	0	0	0	0	0.000337553	0	0	0	0	0	0	0	0	0	0
Aminomonas_paucivorans	0	0	0	0	0	0	0	0	0	0	0	0	0	0	0	0	0	0	0	0	0	0	0	0	0	0	0	0	0	0	0	0	0	0	0	0	0	0	0	0	0	0	0	0	0	0	0	0	0
Amorphus_coralli	0	0	0	0	0	0	0	0	0	0.000127779	0	0	0	0	0	0	0	0	0	0	0	0	0	0	0	0	0	0	0	0	0	0	0	0	0	0	0	0	0	0	0	0	0	0	0	0	0	0	0
Amycolatopsis_benzoatilytica	0	0	0	0	0	0	0	0	0	0	0	0	0	0	0	0	0	0	0	0	0	0	0	0	0	0	0	0	0	0	0	0	0	0	0	0	0	0	0	0	0	0	0	0	0	0	0	0	0
Amycolatopsis_japonica	0	0	0	0	0	0	0	0	0	0	0	0	0	0	0	0	0	0	0	0	0	0	0	0	0	0	0	0	0	0	0	0	0	0	0	0	0	0	0	0	0	0	0	0	0	0	0	0	0
Amycolatopsis_marina	0	0	0	0	0	0	0	0	0	0	0	0	0	0	0	0	0	0	0	4.3018e-06	0	0	0	0	0	0	0	0	0	0	0	0	0	0	0.000214707	0	0	0	0	0	0	0	0	0	0	0	0	0	0
Amycolatopsis_mediterranei	0	0	0	0	0	0	0	0	0	0	0	0	0	0	0	0	0	0	0	0	0	0	0	0	0	0	0	0	0	0	0	0	0	0	0	0	0	0	0	0	0	0	0	0	0	0	0	0	0
Anaerobacillus_alkalilacustris	0	0	0	0	0	0	0	0	0	0	0	0	0	0	0	0	0	0	0	0	0	0	0	0	0	0	0	0	0	0	0	0	0	0	0	0	0	0	0	0	0	0	0	0	0	0	0	0	0
Anaerobium_acetethylicum	0	0	0	0	0	0	0	0	0	0	0	0	0	0	0	0	0	0	0	0	0	0	0	0	0	0	0	0	0	0	0	0	0	0	0	0	0	0	0	0	0	0	0	0	0	0	0	0	0
Anaerobranca_californiensis	0	0	0	0	0	0	0	0	0	0.000127779	0	0	0	0	0	0	0	0	0	0	0	0	0	0	0	0	0	0	0	0	0	0	0	0	0	0	0	0	0	0	0	0	0	0	0	0	0	0	0
Anaerococcus_hydrogenalis	0	0	0	0	0	0	0	0	0	0	0	0	0	0	0	0	0	0	0	0	0	0	0	0	0	0	0	0	0	0	0	0	0	4.8534e-06	0	0	0	0	0	0	0	0	0	0	0	0	0	0	0
Anaerococcus_lactolyticus	0	0	0	0	0	0	0	0	0	0	0	0	0	0	0	0	0	0	0	4.3018e-06	0	0	0	0	0	0	0	0	0	0	0	0	0	0	0	0	0	0	0	0	0	0	2.44147e-05	0	0	0	0	0	0
Anaerococcus_mediterraneensis	0	0	0	0	0	0	0	0	0	0	0	0	0	0	0	0	0	0	0	0	0	0	0	0	0	0	0	0	0	0	0	0	0	4.8534e-06	0	0	0	0	0	0	0	0	0	0	0	0	0	0	0
Anaerococcus_obesiensis	0	0	0	0	0	0.000246214	0	0	0	0.000127779	0	0	0	0	0	0	0	0	0	0	0	0	0	0	0	0	0	0	0	0	0	0	0	0.000148029	0	0	0	0	0	0	0	0	0	0	0	0	0	0	0
Anaerococcus_prevotii	0	0	0	0	0	0.000246214	0	0	0	0.000127779	0	0	0	0.000136633	0	0	0	0	0	0	0	0	0	0	0	0	0	0	0	0	0	0	0	0	0	0	0	0	0	0	0	0	0	0	0	0	0	0	0
Anaerococcus_senegalensis	0	0	0	0	0	0	0	0	0	0.000383338	0	0	0	3.90381e-05	0	0	0	0	0	0	0	0	0	0	0	0	0	0	0	0	0	0	0	4.8534e-06	0.000214707	0	0	0	0	0	0	0	0	0	0	0	0	0	0.000111498
Anaerococcus_tetradius	0	0	0	0	0	0	0.000298775	0	0	0	0	0	0	0	0	0	0	0	0	0	0	0	0	0	0	0	0	0	0	0	0	0	0	0	0	0	0.00164474	0	0	0	0	0	0	0	0.016129	0	0	0	0
Anaerococcus_vaginalis	0	0	0	0	0	0	0	0	0	0.000127779	0	0	0	0	0	0	0	0	0	0	0	0	0	0	0	0	0	0	0	0	0	0	0	4.8534e-06	0	0	0	0	0.000506329	0	0	0	0	0	0	0	0	0	0
Anaeroglobus_geminatus	0	0	0	0	0	0	0	0	0	0.000255558	0	0	0	0	0	7.97639e-05	0	0	0	0.000851756	0	0	0	0.00176835	0	0	0	0	0	0.000705716	0	0	0	0	0	0	0	0	0	0.00011422	0	0	0	0	0	0	0	0	0
Anaeromassilibacillus_senegalensis	0	0	0	0	0	0	0	0	0	0	0	0	0	0	0	0	0	0	0	4.3018e-06	0	0	0	0	0	0	0	0	0	0	0	0	0	0	0	0	0	0	0.000337553	0	0	0	0	0	0	0	0	0	0
Anaeromyxobacter_dehalogenans	0	0	0	0	0	0	0	0	0	0	0	0	0	0	0	0	0	0	0	0	0	0	0	0	0	0	0	0	0	0	0	0	0	0	0	0	0	0	0	0	0	0	0	0	0	0	0	0	0
Anaerosalibacter_massiliensis	0	0	0	0	0	0.000246214	0	0	0	0	0	0	0	0	0	0	0	0	0	0	0	0	0	0	0	0	0	0	0	0	0	0	0	4.8534e-06	0	0	0	0	0	0	0	0	0	0	0	0	0	0	0
Anaerosporobacter_mobilis	0	0	0	0	0	0	0.000298775	0	0	0	0	0	0	0	0	0	0	0	0	0	0	0	0	0	0	0	0	0	0	0	0	0	0	0	0	0	0	0	0	0	0	0	0	0	0	0	0	0	0
Anaerosporomusa_subterranea	0	0	0	0	0	0	0	0	0	0.000127779	0	0	0	0	0	0	0	0	0	0	0	0	0	0	0	0	0	0	0	0	0	0	0	0	0	0	0	0	0	0	0	0	0	0	0	0	0	0	0
Anaerostipes_caccae	0	0	0	0	0	0	0	0	0	0	0	0	0	0	0	0	0	0	0	0	0	0	0	0	0	0	0	0	0	0	0	0	0	0	0	0	0	0	0	0	0	0	0	0	0	0	0	0	0
Anaerostipes_hadrus	0	0	0	0	0	0	0	0	0	0	0	0	0	0	0	1.3294e-05	0	0	0	0	0	0	0	0	0	0	0	0	0	0	0	0	0	4.8534e-06	0	0	0	0	0	0	0	0	0	0	0	0	0	0	0
Anaerotignum_lactatifermentans	0	0	0	0	0	0	0	0	0	0	0	0	0	0	0	0	0	0	0	0	0	0	0	0	0	0	0	0	0	0	0	0	0	0	0	0	0	0	0	0	0	0	0	0	0	0	0	0	0
Anaerotruncus_colihominis	0	0	0	0	0	0	0	0	0	0.000127779	0	0	0	0	0	0	0	0	0	0	0	0	0	0	0	0	0	0	0	0.000705716	0	0	0	0	0	0	0	0	0	0	0	0	0	0	0	0	0	0	0
Anaerovorax_odorimutans	0	0	0	0	0	0	0	0	0	0	0	0	0	0	0	0	0	0	0	0	0	0	0	0	0	0	0	0	0	0	0	0	0	0	0	0	0	0	0	0	0	0	0	0	0	0	0	0	0
Anaplasma_phagocytophilum	0	0	0	0	0	0	0	0	0	0	0	0	0	0	0	0	0	0	0	0	0	0	0	0	0	0	0	0	0	0	0	3.56043e-05	0	0	0	0	0	0	0	0	0	0	0	0	0	0	0	0	0
Ancylobacter_rudongensis	0	0	0	0	0	0	0	0	0	0	0	0	0	0	0	0	0	0	0	0	0	0	0	0	0	0	0	0	0	0	0	0	0	0	0	0	0	0	0	0	0	0	0	0	0	0	0	0	0
Ancylostoma_duodenale	0	0	0	0	0	0	0	0	0	0	0	0	0	0	0	0	0	0	0	0	0	0	0	0	0	0	0	0	0	0	0	0	0	0	0	0	0	0	0	0	0	0	0	0	0	0	0	0	0
Andreesenia_angusta	0	0	0	0	0	0	0	0	0	0	0	0	0	0	0	0	0	0	0	0	0	0	0	0	0	0.00167973	0	0	0	0	0	0	0	0	0	0	0	0	0	0	0	0	0	0	0	0	0	0	0
Andreprevotia_lacus	0	0	0	0	0	0	0	0	0	0	0	0	0	0	0	0	0	0	0	0	0	0	0	0	0	0	0	0	0	0	0	0	0	0	0	0	0	0	0	0	0	0	0	0	0	0	0	0	0
Aneurinibacillus_aneurinilyticus	0	0	0	0	0	0	0	0	0	0	0	0	0	0	0	0	0	0	0	0	0	0	0	0	0	0	0	0	0	0	0	0	0	0	0	0	0	0	0	0	0	0	0	0	0	0	0	0	0
Anisakis_simplex	0	0	0	0	0	0	0	0	0	0	0	0	0	0	0	0	0	0	0	0	0	0	0	0	0	0	0	0	0	0.000705716	0	0	0	0	0	0	0	0	0	0	0	0	0	0	0	0	0	0	0
Anoxybacillus_amylolyticus	0	0	0	0	0	0	0	0	0	0	0	0	0	0	0	0	0	0	0	4.3018e-06	0	0	0	0	0	0	0	0	0	0	0	0	0	0	0	0	0	0	0	0	0.000924214	0	2.44147e-05	0	0	0	0	0	0
Anoxybacillus_flavithermus	0	0	0	0	0	0.000492429	0	0	0	0.000127779	0	0	0	1.95191e-05	0	0	0	0	0	0	0	0	0	0	0	0	5.36265e-05	0	0	0	3.65453e-05	0	0	0	0	0	0	0	0.000506329	0	0	0	0	0.000332978	0	0	0	0	0
Antarctobacter_heliothermus	0	0	0	0	0	0	0	0	0	0	0	0	0	0	0	0	0	0	0	0	0	0	0	0	0	0	0	0	0	0	0	0	0	0	0	0	0	0	0	0	0	0	0	0	0	0	0	0	0
Apophysomyces_variabilis	0	0	0	0	0	0	0	0	0	0	0	0	0	0	0	0	0	0	0	0	0	0	0	0	0	0	0	0	0	0.000705716	0	0	0	0	0	0	0	0	0	0	0	0	0	0	0	0	0	0	0
Aquabacterium_parvum	0	0	0	0	0.000178031	0.000615536	0	0	0.00276625	0.0012139	0	0	0	0	0	0	0.00107991	0	0	4.3018e-06	0	0	0	0	0	0	0	0	0	0.00282287	2.43635e-05	0	0	0	0.00085883	0.0075188	0	0	0	0	0	0	2.44147e-05	0	0.016129	0	0	0	5.57491e-05
Aquamicrobium_defluvii	0	0	0	0	0.000267046	0	0	0	0	0.000127779	0	0	0	0	0	0	0	0	0	0	0	0	0	0	0	0	0	0	0	0.00105857	0	0	0	0	0	0	0	0	0	0	0	0	4.88293e-05	0	0	0	0	0	0
Aquaspirillum_serpens	0	0	0	0	0	0	0	0	0	0	0	0	0	0	0	0	0	0	0	0	0.00104712	0	0	0	0	0	0	0	0	0	0	0	0	0	0	0	0	0	0.000337553	0	0	0	0	0.000133191	0	0	0	0	0
Aquiflexum_balticum	0	0	0	0	0	0	0	0	0	0	0	0	0	0	0	0	0	0	0	0	0	0	0	0	0	0	0	0	0	0	0	0	0	0	0	0	0	0	0	0	0	0	0	0	0	0	0	0	0
Aquimixticola_soesokkakensis	0	0	0	0	0	0	0	0	0	0	0	0	0	0	0	0	0	0	0	0	0	0	0	0	0	0	0	0	0	0	0	0	0	0	0	0	0	0	0.00101266	0	0	0	0	0	0	0	0	0	0
Aquimonas_voraii	0	0	0	0	0	0	0	0	0	0	0	0	0	0	0	0	0	0	0	0	0	0	0	0	0	0	0	0	0	0	0	0	0	0	0	0	0	0	0	0	0	0	0	0	0	0	0	0	0
Aquincola_tertiaricarbonis	0	0	0	0	0	0.000492429	0	0	0	0.000127779	0	0	0	0	0	0	0	0	0	0	0.00104712	0	0	0	0	0	0	0	0	0.000705716	2.43635e-05	3.56043e-05	0	0	0.00182501	0	0	0	0	0	0	0	4.88293e-05	0.000133191	0	0	0	0	5.57491e-05
Aquitalea_pelogenes	0	0	0	0	0	0.00307768	0.000746938	0	0	0.000255558	0	0	0	0	0	0	0	0	0	0	0	0	0	0	0	0	0	0	0	0.0134086	0	0	0	0	0.000429415	0.00902256	0	0	0	0	0	0	0	0	0	0	0	0	0.000850174
Arcanobacterium_haemolyticum	0	0	0	0	0	0	0	0	0	0	0	0	0	0	0	0	0	0	0	0	0	0	0	0	0	0	0	0	0	0	0	0	0	0	0	0	0	0	0	0	0	0	0	0	0	0	0	0	0
Arcanobacterium_urinimassiliense	0	0	0	0	0	0	0	0	0	0	0	0	0	0	0	0	0	0	0	0	0	0	0	0	0	0	0	0	0	0.00247001	0	0	0	4.8534e-06	0	0	0	0	0	0	0	0	0	0	0	0	0	0	0
Arcobacter_butzleri	0	0	0	0	0	0	0	0	0	0	0	0	0	0	0	0	0	0	0	0	0	0	0	0	0	0	0	0	0	0	0	0	0	0	0	0	0	0	0	0	0	0	0	0	0	0	0	0	0
Arcobacter_cryaerophilus	0	0	0	0	0	0.00135418	0.000896325	0	0	0.00172502	0.000130225	0	0	0	0	0	0	0	0	0	0.00418848	0	0	0	0	0	0	0	0	0.00176429	0	0	0	0	0	0	0	0	0	0	0	0	0	0	0	0	0	0	0.000362369
Arcobacter_nitrofigilis	0	0	0	0	0	0	0	0	0	0	0	0	0	0	0	0	0	0	0	0	0	0	0	0	0	0	0	0	0	0	0	0	0	0	0.000214707	0	0	0	0	0	0	0	0	0	0	0	0	0	5.57491e-05
Arcobacter_skirrowii	0	0	0	0	0	0.000492429	0.000298775	0	0	0.000894454	0	0	0	0	0	0	0	0	0	0	0	0	0	0	0	0	0	0	0	0	0	0	0	0	0	0.00300752	0	0	0	0	0	0	0	0	0	0	0	0	5.57491e-05
Arcticibacter_svalbardensis	0	0	0	0	0	0	0	0	0	0.000127779	0	0	0	0	0	0	0	0	0	0	0	0	0	0	0	0	0	0	0	0	0	0	0	0	0	0	0	0	0	0	0	0	0	0	0	0	0	0	0
Arenimonas_malthae	0	0	0	0	0.000267046	0	0	0	0	0	0	0	0	0	0	0	0	0	0	0	0	0	0	0	0	0	0	0	0	0	2.43635e-05	0	0	0	0.000214707	0	0	0	0.000337553	0	0	0	0	0	0	0	0	0	0
Arhodomonas_aquaeolei	0	0	0	0	0	0	0	0	0	0	0	0	0	0	0	0	0	0	0	0	0	0	0	0	0	0	0	0	0	0	0	0	0	0	0	0	0	0	0	0	0	0	0	0	0	0	0	0	0
Aromatoleum_aromaticum	0	0	0	0	0	0	0	0	0	0.000127779	0	0	0	0	0	0	0	0	0	0	0	0	0	0	0	0	0	0	0	0	0	0	0	0	0.000214707	0	0	0	0.000337553	0	0	0	0	0	0	0	0	0	0
Arsenicibacter_rosenii	0	0	0	0	0	0	0	0	0	0	0	0	0	0	0	0	0	0	0	0	0	0	0	0	0	0	0	0	0	0	0	0	0	0	0	0	0	0	0.000337553	0	0	0	0	0	0.016129	0	0	0	0
Arsenicicoccus_bolidensis	0	0	0	0	0.000178031	0	0	0	0	0	0	0	0	0	0	1.3294e-05	0	0	0	0	0	0	0	0	0	0	0	0	0	0.000705716	0.000109636	0	0	4.8534e-06	0.000644122	0	0	0	0.000337553	0	0	0	9.76586e-05	0	0	1.47859e-05	0	0	0
Arthrobacter_arilaitensis	0	0	0	0	0	0	0	0	0	0	0	0	0	0	0	0	0	0	0	0	0	0	0	0	0	0	0	0	0	0	0	0	0	0	0	0	0	0	0	0	0	0	0	0	0	0	0	0	0
Arthrobacter_chlorophenolicus	0	0	0	0	0	0	0	0	0	0.000127779	0	0	0	0	0	0	0	0	0	0	0	0	0	0	0	0	0	0	0	0	0	0	0	0	0	0	0	0	0	0	0	0	0	0	0	0	0	0	0
Arthrobacter_luteolus	0	0	0	0	0	0	0	0	0	0	0	0	0	0	0	0	0	0	0	0	0	0	0	0	0	0	0	0	0	0	0	0	0	0	0	0	0	0	0	0	0	0	0	0	0	0	0	0	0
Arthrobacter_phenanthrenivorans	0	0	0	0	0	0	0	0	0	0	0	0	0	0	0	0	0	0	0	0	0	0	0	0	0	0	0	0	0	0	0	0	0	0	0	0	0	0	0.000337553	0	0	0	0	0	0	0	0	0	0
Asaccharospora_irregularis	0	0	0	0	0	0	0	0	0	0	0	0	0	0	0	0	0	0	0	0	0	0	0	0	0	0	0	0	0	0	0	0	0	0	0	0	0	0	0	0	0	0	6.10366e-05	0	0	0	0	0	0
Aspergillus_calidoustus	0	0	0	0	0	0	0	0	0	0	0	0	0	0	0	0	0	0	0	0	0	0	0	0	0	0	0	0	0	0	0	0	0	0	0	0	0	0	0	0	0	0	0	0	0	0	0	0	0
Aspergillus_campestris	0	0	0	0	0	0	0	0	0	0	0	0	0	0	0	0	0	0	0	0	0	0	0	0	0	0	0	0	0	0	0	0	0	0	0	0	0	0	0	0	0	0	0	0	0	0	0	0	0
Aspergillus_chevalieri	0	0	0	0	0	0	0	0	0	0	0	0	0	0	0	0	0	0	0	0	0	0	0	0	0	0	0	0	0.000107724	0	0	0	0	0	0	0	0	0	0	0	0	0	0	0	0	0	0	0	0
Aspergillus_cristatus	0	0.000116259	0	0	0	0	0	0	0	0	0	0	0	0	0	0	0	0	0	0	0	0	0	0	0	0	0	0	0	0	0	0	0	0	0	0	0	0	0.000337553	0	0	0	2.44147e-05	0	0	0	0	0	0
Aspergillus_fijiensis	0	0	0	0	0	0	0	0	0	0	0	0	0	0	0	0	0	0	0	0	0	0	0	0	0	0	0	0	0	0	0	0	0	0	0	0	0	0	0	0	0	0	0	0	0	0	0	0	0
Aspergillus_fischeri	0.00118906	0	0	0	0.000178031	0	0	0	0	0	0	0	0	0	0	0	0	0	0	0	0	0	0	0	0	0	0	0	0	0	3.65453e-05	0	0	0	0	0	0	0	0	0	0	0	0	0	0	0	0	0	0
Aspergillus_flavus	0	0	0	0	0.000178031	0	0	0	0	0	0	0	0	0	0	0	0	0	0	0	0	0	0	0	0	0	0	0	0	0	0	0	0	0	0	0	0	0	0	0	0	0	0	0	0	0	0	0	0
Aspergillus_fumigatus	0.0356718	0	0	0	0.0255474	0	0	0	0	0	0	0	0	0	0.00141887	0	0	0	0	0	0	0	0.241758	0.00839965	0	0	0	0	0	0	0	0	0	0	0	0	0	0	0	0	0	0	0	0	0	0	0.00277162	0	0
Aspergillus_glaucus	0	0	0	0	0	0	0	0	0	0.00325837	0	0	0	0	0	0	0	0	0	0	0	0	0	0	0	0	0	1.15154e-05	0	0	2.43635e-05	0	0	0	0	0	0	0	0.000675105	0	0	0	0	0	0	0	0	0	0
Aspergillus_nidulans	0	0.0420857	0	0	0	0	0	0	0	0	0	0	0	0	0	0.000478583	0	0	0	0	0	0	0	0	0	0	0	0	0	0	0	0	0	0	0	0	0	0	0	0	0	0	0	0	0	0	0	0	0
Aspergillus_niger	0	0	0.00299401	0	0	0	0	0	0	0.000127779	0	0	0	0	0	0	0	0	0.114754	0	0	0	0	0	0	0	0	0	0	0	0	0	0	0	0	0	0	0	0	0	0	0	0	0	0	0	0	0	0
Aspergillus_persii	0	0	0	0	0	0	0.000298775	0	0	0	0	0	0	0	0	0	0	0	0	0	0	0	0	0	0	0	0	0	0	0	0	0	0	0	0	0	0	0	0	0	0	0	0	0	0	0	0	0	0
Aspergillus_pseudotamarii	0	0	0	0	0	0	0	0	0	0	0	0	0	1.95191e-05	0	0	0	0	0	0	0	0	0	0	0	0	0	0	0	0	0	0	0	0	0	0	0	0	0	0	0	0	0	0	0	0	0	0	0
Aspergillus_ruber	0	0	0	0	0	0.000246214	0	0	0	0.000127779	0	0	0	0	0	0	0	0	0	0	0	0	0	0	0	0	0	0	0.000269309	0	0	0	0	0	0	0	0	0	0.000337553	0	0	0	0	0	0.016129	0	0	0	0
Aspergillus_sclerotialis	0	0	0	0	0	0	0	0	0	0	0	0	0	0	0	0	0	0	0	0	0	0	0	0	0	0	0	0	0.000107724	0	0	0	0	0	0.000214707	0	0	0	0.000675105	0	0	0	0	0	0	0	0.000554324	0	0
Aspergillus_sojae	0	0	0	0	0	0	0	0	0	0	0	0	0	0	0	0	0	0	0	0	0	0	0	0	0	0	0	0	0	0	0	0	0	0	0	0	0	0	0	0	0	0	0	0	0	0	0	0	0
Aspergillus_spinulosporus	0	0.00441783	0	0	0	0	0	0	0	0	0	0	1.68101e-05	0	0	0	0.00107991	0	0	4.3018e-06	0	0.000225098	0	0	0	0	0	0	0	0	0	0	0.000647459	0	0	0	0	0.000824063	0	0	0	0	0	0.000133191	0	0	0.000554324	0	0
Aspergillus_sydowii	0	0	0.00299401	0	0	0.000615536	0	0.0127971	0	0.00255558	0	0	0	1.95191e-05	0	0	0	0	0	8.60359e-06	0	0	0	0	0	0	0	0	0	0.00176429	2.43635e-05	3.56043e-05	0	0	0	0	0	0.000824063	0.0133333	0	0	0	0	0	0	0	0	0	0.00045993
Aspergillus_tamarii	0	0	0	0	0	0	0	0	0	0	0	0	0	0	0	0	0	0	0	0	0	0	0	0	0	0	0	0	0	0	0	0	0	0	0	0	0	0	0	0	0	0	0	0	0	0	0	0	0
Aspergillus_tubingensis	0	0	0	0	0	0	0	0	0	0	0	0	0	0	0	0	0	0	0	0	0	0	0	0	0	0	0	0	0	0	0	0	0	0	0	0	0	0	0	0	0	0	0	0	0	0	0	0	5.57491e-05
Aspergillus_turcosus	0	0	0	0	0	0	0	0	0	0	0	0	0	0	0	0	0	0	0	0	0	0	0	0	0	0	0	0	0	0	0	0	0	0	0	0	0	0	0	0	0	0	0	0	0	0	0	0	0
Aspergillus_ustus	0	0	0	0	0	0	0	0	0	0	0	0	0	0	0	0	0	0	0	0	0	0	0	0	0	0	0	0	0	0	0	0	0	0	0	0	0	0	0.000337553	0	0	0	0	0	0	0	0	0	0
Aspergillus_versicolor	0	0	0	0	0	0.000615536	0	0.00548446	0	0.00108612	0	0	0	0	0	0	0	0	0.00546448	0	0	0.000112549	0	0	0	0	0	0	0	0	0	0	0	0	0	0.00300752	0	0	0	0	0	0	0	0	0	0	0	0	0.00030662
Aspergillus_viridinutans	0	0	0	0	0	0	0	0	0	0	0	0	0	0	0	0	0	0	0	0	0	0	0	0	0	0	0	0	0	0	0	0	0	0	0	0	0	0	0	0	0	0	0	0	0	0	0	0	0
Aspergillus_wentii	0	0	0	0	0	0	0	0	0	0	0	0	0	0	0	0	0	0	0	0	0	0	0	0	0	0	0	0	0	0	0	0	0	0	0	0	0	0	0	0	0	0	0	0	0	0	0	0	0
Asticcacaulis_biprosthecium	0	0	0	0	0	0.000246214	0	0	0	0	0	0	0	0	0	0	0	0	0	0	0	0	0	0	0	0	0	0	0	0	2.43635e-05	3.56043e-05	0	0	0	0	0	0.000824063	0.000337553	0	0	0	2.44147e-05	0	0	0	0	0	5.57491e-05
Asticcacaulis_excentricus	0	0	0	0	0	0	0	0	0.00276625	0.00172502	0	0	0	0	0	0	0	0	0	0	0	0	0	0	0	0	0	0	0	0.00176429	0	3.56043e-05	0	0	0.000644122	0	0	0	0	0	0	0	2.44147e-05	0	0	0	0	0	0
Atlantibacter_hermannii	0	0	0.00299401	0	0	0	0	0	0	0	0	0	0	0	0	0	0	0	0	0	0	0	0	0	0	0	0	0	0	0.000705716	0	0	0	0	0	0	0	0	0	0	0	0	0	0	0	0	0	0	0
Atopobium_fossor	0	0	0	0	0.000178031	0	0	0	0	0	0	0	0	0	0	0	0	0	0	0	0	0	0	0	0	0	0	0	0	0	0	0	0	0	0	0	0	0	0	0	0	0	0	0	0	0	0	0	0
Atopobium_minutum	0	0	0	0	0	0	0	0	0	0	0	0	0	0	0	0	0	0	0	0	0	0	0	0	0	0	0	0	0	0	0	0	0	0	0	0	0	0	0	0.00011422	0	0	0	0	0	0	0	0	0
Atopobium_parvulum	0.00118906	0	0	0	0.000712124	0	0.000298775	0	0	0.000255558	0.000130225	0	0	0	0	0.000412113	0	0	0.00546448	1.72072e-05	0	0	0	0.00176835	0	0.0408735	0.00104572	2.30309e-05	0	0	0.0088805	5.34064e-05	0.00226611	0.000165016	0	0	0	0	0	0.0150771	0	0	0.000158695	0.000665956	0	0.00641708	0	0	0
Atopobium_rimae	0	0	0	0	0	0.000492429	0	0	0	0.000127779	0	0	0	0	0	0.00562335	0	0	0	0.000408671	0	0	0	0.000884173	0	0.00111982	0	0	0	0	0.000170545	3.56043e-05	0	3.15471e-05	0	0	0	0	0	0.00479726	0	0	2.44147e-05	0	0	0.000118287	0	0	0
Atopobium_vaginae	0	0.000116259	0	0	0	0	0.000298775	0	0	0.000127779	0	0	0	0	0	0	0	0	0	4.3018e-06	0	0	0	0	0	0	0	0	0	0	0	0	0	0	0	0	0.00328947	0	0.000337553	0	0	0	0	0	0	0	0	0	0.00045993
Atopococcus_tabaci	0	0	0	0	0	0	0	0	0	0.000127779	0.000130225	0	0	0	0	0	0	0	0	0	0	0	0	0	0	0	0	0	0	0	0	0	0	0	0	0	0	0	0	0	0	0	0	0	0	0	0	0	0.000111498
Atopostipes_suicloacalis	0	0	0	0	0	0	0	0	0	0.000255558	0	0	0	0	0	0	0	0	0	0	0	0	0	0	0	0	0	0	0	0	0	0	0	0	0.000214707	0	0	0	0	0	0	0	4.88293e-05	0	0	0	0	0	0
Aurantimonas_manganoxydans	0	0	0	0	0	0	0	0	0	0	0	0	0	0	0	0	0	0	0	0	0	0	0	0	0	0	0	0	0	0	0	0	0	0	0	0	0	0	0	0	0	0	0	0	0	0	0	0	0
Auraticoccus_monumenti	0	0	0	0	0	0	0	0	0	0	0	0	0	0	0	0	0	0	0	8.60359e-06	0	0	0	0	0	0	0	0	0	0	0	0	0	0	0	0	0	0	0	0	0	0	0	0	0	0	0	0	0
Aureimonas_altamirensis	0	0	0	0	0	0	0	0	0	0	0	0	0	0	0	0	0	0	0	0	0	0	0	0	0	0	0	0	0	0.000705716	0	0	0	0	0.000429415	0	0	0	0.000675105	0	0	0	0	0	0	0	0	0	5.57491e-05
Aureimonas_frigidaquae	0	0	0	0	0	0	0	0	0	0	0	0	0	0	0	0	0	0	0	0	0	0	0	0	0	0	0	0	0	0	0	0	0	0	0	0	0	0	0	0	0	0	0	0	0	0	0	0	0
Aureobasidium_melanogenum	0	0	0	0	0	0	0	0	0	0	0	0	0	0	0	0	0	0	0	0	0	0	0	0	0	0	0	0	0	0	0	0	0	4.8534e-06	0	0	0	0	0	0	0	0.0197628	0	0	0	0	0	0	0
Aureobasidium_namibiae	0	0	0	0	0	0	0	0	0	0	0	0	0	0	0	0	0	0	0	0	0	0	0	0	0	0	0	0	0	0	0	0	0	0	0	0	0	0	0	0	0	0	0	0	0	0	0	0	0
Aureobasidium_pullulans	0	0	0	0	0	0	0	0	0	0	0	0	0	0	0	0	0	0	0	0	0	0	0	0	0	0	0	0	0	0	0	0	0	0	0.000429415	0	0	0	0	0	0	0	0	0	0	0	0	0	0
Aureobasidium_subglaciale	0	0	0	0	0	0	0	0	0	0	0	0	0	0	0	0	0	0	0	0	0	0	0	0	0	0	0	0	0	0	0	0	0	0	0	0	0	0	0	0	0	0	0	0	0	0	0	0	0
Auricoccus_indicus	0	0	0	0.0168067	0	0	0.000448163	0	0	0	0.000130225	0	0	0	0	0	0	0	0	4.3018e-06	0	0	0	0	0	0	0	0	0.000107724	0	2.43635e-05	0	0	0	0.000214707	0.00300752	0	0	0.0028692	0	0	0.0118577	4.88293e-05	0.000599361	0	0	0	0	0.00629965
Avian_endogenous_retrovirus_EAV_HP	0	0	0	0	0	0	0	0	0	0	0	0	0	0	0	0	0	0	0	0	0	0	0	0	0	0	0	0	0	0	0	0	0	0	0.000214707	0	0	0	0	0	0	0	0	0	0	0	0	0	0
Azoarcus_toluclasticus	0	0	0	0	0	0	0	0	0	0	0	0	0	0	0	0	0	0	0	0	0	0	0	0	0	0	0	0	0	0.000705716	0	0	0	0	0.000214707	0	0	0	0.000506329	0	0	0	0	0	0	0	0	0	0
Azohydromonas_lata	0	0	0	0	0	0	0	0	0	0	0	0	0	1.95191e-05	0	0	0	0	0	4.3018e-06	0	0	0	0	0	0	0	0	0	0.00176429	0	0	0	0	0	0.00300752	0	0	0	0	0	0	8.54513e-05	0	0	0	0	0	5.57491e-05
Azonexus_hydrophilus	0	0	0	0	0	0	0	0	0	0.000127779	0	0	0	0	0	0	0	0	0	0	0	0	0	0	0	0	0	0	0	0	0	0	0	0	0	0	0	0	0	0	0	0	0	0	0	0	0	0	0
Azorhizobium_caulinodans	0	0	0	0	0	0	0	0	0	0	0	0	0	1.95191e-05	0	0	0	0	0	0	0	0	0	0	0	0	0	0	0	0.00105857	0	0	0	0	0.000214707	0	0	0	0	0	0	0	0	0	0	0	0	0	0
Azorhizobium_doebereinerae	0	0	0	0	0	0	0	0	0	0	0	0	0	0	0	0	0	0	0	0	0	0	0	0	0	0	0	0	0	0	0	3.56043e-05	0	0	0	0	0	0	0.000337553	0	0	0	0	0	0	0	0	0	0
Azospira_oryzae	0	0.000232518	0	0	0	0	0	0	0	0	0	0	0	0	0	0	0	0	0	4.3018e-06	0	0	0	0	0	0	0	0	0	0	0	3.56043e-05	0	0	0.00085883	0	0	0	0	0	0	0	0	0.000133191	0	0	0	0	0
Azospirillum_brasilense	0	0	0	0	0.000178031	0	0	0	0	0	0	0	0	0	0	0	0	0	0	0	0	0	0	0	0	0	0	0	0	0	0	0	0	0	0.000214707	0	0	0	0	0	0	0	0	0	0	0	0	0	0
Azospirillum_halopraeferens	0	0	0	0	0	0.000246214	0	0	0	0	0	0	0	0	0	0	0	0	0	0	0	0	0	0	0	0	0	0	0	0.000705716	0	0	0	0	0	0	0	0	0	0	0	0	0	0	0	0	0	0	0
Azotobacter_vinelandii	0	0	0	0	0.000178031	0	0	0	0	0	0	0	0	5.85572e-05	0	0	0	0	0	0	0.00104712	0	0	0	0	0	0	0	0	0	0	0	0	0	0.00085883	0	0	0	0.000506329	0	0	0	0	0	0	1.47859e-05	0	0	0
Azovibrio_restrictus	0	0	0	0	0	0	0	0	0	0	0	0	0	0	0	0	0	0	0	0	0	0	0	0	0	0	0	0	0	0	0	0	0	0	0	0	0	0	0	0	0	0	0	0	0	0	0	0	5.57491e-05
Bacillus_acanthi	0	0	0	0	0	0	0	0	0	0	0	0	0	0	0	0	0	0	0	0	0	0	0	0	0	0	0	0	0	0	0	0	0	0	0	0	0	0	0	0	0	0	0	0	0	0	0	0	0
Bacillus_acidicola	0	0	0	0	0	0	0	0	0	0	0	0	0	0	0	0	0	0	0	0	0	0	0	0	0	0	0	0	0	0	0	0	0	0	0	0	0	0	0	0	0	0	0	0	0	0	0	0	0
Bacillus_aciditolerans	0	0	0	0	0	0.000246214	0.000298775	0	0	0.00146946	0	0	0	0	0	0	0	0	0	0	0.00942408	0	0	0	0	0	0	0	0	0	0	3.56043e-05	0.000647459	0	0	0	0	0	0	0	0	0	0	0	0	0	0	0	5.57491e-05
Bacillus_alcalophilus	0	0	0	0	0	0	0	0	0	0	0	0	0	0	0	0	0	0	0	0	0	0	0	0	0	0	0	0	0	0	0	0	0	0	0.000214707	0	0	0	0	0	0	0	0	0	0	0	0	0	0
Bacillus_alkalinitrilicus	0	0	0	0	0	0	0	0	0	0	0	0	0	0	0	0	0	0	0	0	0	0	0	0	0	0	0	0	0	0	0	0	0	0	0	0	0	0	0	0	0	0	0	0	0	0	0	0	0
Bacillus_alkalitelluris	0	0	0	0	0	0	0	0	0	0	0	0	0	0	0	0	0	0	0	0	0	0	0	0	0	0	0	0	0	0	0	0	0	0	0	0	0	0	0	0	0	0	0	0	0	0	0	0	0
Bacillus_alveayuensis	0	0	0	0	0	0	0	0	0	0	0	0	0	0	0	0	0	0	0	0	0	0	0	0	0	0	0	0	0	0	0	0	0	0	0	0	0	0	0	0	0	0	0	0	0	0	0	0	0
Bacillus_andreraoultii	0	0	0	0	0	0	0	0	0	0	0	0	0	0	0	1.3294e-05	0	0	0	0	0	0	0	0	0	0	0	0	0	0	0	0	0	0	0	0	0	0	0	0	0	0	0	0	0	0	0	0	0
Bacillus_aryabhattai	0	0	0	0	0	0	0	0	0	0	0	0	0	0	0	0	0	0	0	0	0	0	0	0	0	0	0	0	0.000107724	0	0	0	0	0	0.000214707	0	0	0	0	0	0	0	0	0	0	0	0	0	0
Bacillus_asahii	0	0	0	0	0	0	0	0	0	0	0	0	0	0	0	0	0	0	0	0	0	0	0	0	0	0	0	0	0	0	0	0	0	0	0	0	0	0	0	0	0	0	0	0	0	0	0	0	0
Bacillus_azotoformans	0	0	0	0	0	0	0	0	0	0	0	0	0	0	0	0	0	0	0	0	0.0052356	0	0	0	0	0	0	0	0	0	0	0	0	0	0	0	0	0	0	0	0	0	0	0	0	0	0	0	0
Bacillus_badius	0	0	0	0	0	0	0	0	0	0	0	0	0	0	0	0	0	0	0	0	0	0	0	0	0	0	0	0	0	0	0	0	0	0	0	0	0	0	0	0	0	0	0	0	0	0	0	0	0
Bacillus_bataviensis	0	0	0	0	0	0	0	0	0	0	0	0	0	0	0	0	0	0	0	4.3018e-06	0	0	0	0	0	0	0	0	0	0	0	0	0	0	0	0	0	0	0	0	0	0	0	0	0	0	0	0	0
Bacillus_bingmayongensis	0	0	0	0	0	0	0	0	0	0	0	0	0	0	0	0	0	0	0	0	0	0	0	0	0	0	0	0	0	0	0	0	0	0	0	0	0	0	0	0	0	0	0	0	0	0	0	0	0
Bacillus_bogoriensis	0	0	0	0	0	0	0	0	0	0	0	0	0	0	0	0	0	0	0	0	0	0	0	0	0	0	0	0	0	0	0	0	0	0	0	0	0	0	0	0	0	0	0	0	0	0	0	0	0
Bacillus_butanolivorans	0	0	0	0	0	0	0	0	0	0	0	0	0	0	0	0	0	0	0	0	0	0	0	0	0	0	0	0	0	0	0	0	0	0	0	0	0	0	0	0	0	0	0	0	0	0	0	0	0
Bacillus_caldolyticus	0	0	0	0	0	0	0	0	0	0.000255558	0	0	0	0	0	0	0	0	0	0	0	0	0	0	0	0	0	0	0	0	0	0	0	0	0	0	0	0	0	0	0	0	0	0	0	0	0	0	0
Bacillus_camelliae	0	0	0	0	0	0	0	0	0	0	0	0	0	0	0	0	0	0	0	0	0	0	0	0	0	0	0	0	0	0	0	0	0	0	0	0	0	0	0	0	0	0	0	0	0	0	0	0	0
Bacillus_canaveralius	0	0	0	0	0	0	0	0	0	0	0	0	0	0	0	0	0	0	0	0	0	0	0	0	0	0	0	0	0	0	0	0	0	0	0	0	0	0	0	0	0	0	0	0	0	0	0	0	0
Bacillus_caseinilyticus	0	0	0	0	0	0.000246214	0	0	0	0	0	0	0	0	0	0	0	0	0	0	0	0	0	0	0	0	0	0	0	0	0	0	0	0	0	0	0	0	0	0	0	0	0	0	0	0	0	0	0
Bacillus_cecembensis	0	0	0	0	0	0	0	0	0	0	0	0	0	0	0	0	0	0	0	0	0	0	0	0	0	0	0	0	0	0	0	0	0	0	0	0	0	0	0	0	0	0	0	0	0	0	0	0	0
Bacillus_cereus	0	0	0	0	0.000178031	0	0	0	0	0	0	0	0	0	0	0	0	0	0	0	0	0	0	0	0	0	0	0	0	0	0	0	0	0	0	0	0	0	0	0	0	0	0	0	0	0	0	0	0
Bacillus_cihuensis	0	0	0	0	0	0	0	0	0	0	0	0	0	0	0	0	0	0	0	0	0	0	0	0	0	0	0	0	0	0	0	0	0	0	0	0	0	0	0	0	0	0	0	0	0	0	0	0	0
Bacillus_circulans	0	0	0	0	0	0	0	0	0	0	0	0	0	0	0	0	0	0	0	0	0	0	0	0	0	0	0	0	0	0	0	0	0	0	0	0	0	0	0	0	0	0	0	0	0	0	0	0	0
Bacillus_coagulans	0	0	0	0	0	0	0	0	0	0	0	0.0175439	0	0	0	0	0	0	0	0	0	0	0	0	0	0	0	0	0	0.00105857	2.43635e-05	0	0	0	0.00203972	0	0	0	0.000337553	0	0	0	0	0	0	0	0	0	0
Bacillus_coahuilensis	0	0	0	0	0.000178031	0	0	0	0	0	0	0	0	0	0	0	0	0	0	0	0	0	0	0	0	0	0	0	0	0	0	0	0	0	0	0	0	0	0	0	0	0	0	0	0	0	0	0	0
Bacillus_cohnii	0	0	0	0	0	0	0	0	0	0	0	0	0	0	0	0	0	0	0	0	0	0	0	0	0	0	0	0	0	0	0	0	0	0	0	0	0	0	0	0	0	0	0	0	0	0	0	0	0
Bacillus_fastidiosus	0	0	0	0	0	0	0	0	0	0	0	0	0	0	0	0	0	0	0	0	0	0	0	0	0	0	0	0	0	0	0	0	0	0	0	0	0	0	0	0	0	0	0	0	0	0	0	0	0
Bacillus_firmus	0	0	0	0	0	0	0	0	0	0	0	0	0	0	0	0	0	0	0	0	0	0	0	0	0	0	0	0	0	0	0	0	0	0	0	0	0	0	0	0	0	0	0	0	0	0	0	0	0
Bacillus_flexus	0	0	0	0	0	0	0	0	0	0	0	0	0	0	0	0	0	0	0	0	0	0	0	0	0	0	0	0	0	0	0	0	0	0	0	0	0	0	0	0	0	0	0	0	0	0	0	0	0
Bacillus_fortis	0.039239	0	0.00748503	0.344538	0.000890155	0.000492429	0.00388408	0.00548446	0	0	0.000651126	0	8.40506e-05	0	0	7.97639e-05	0.00323974	0	0.010929	8.60359e-06	0.00418848	0.000562746	0	0	0	0	0	0	0.000484757	0.000705716	0.000219272	0	0.00809323	6.06675e-05	0.000644122	0	0	0.00247219	0.000506329	0.000571102	0.012939	0.162055	4.88293e-05	0.00293021	0.129032	0	0	0.00389206	0
Bacillus_funiculus	0	0	0	0	0	0	0	0	0	0	0	0	0	0	0	0	0	0	0	0	0	0	0	0	0	0	0	0	0	0	0	0	0	0	0	0	0	0	0	0	0	0	0	0	0	0	0	0	0
Bacillus_ginsengihumi	0	0	0	0	0	0	0	0	0.00276625	0	0	0	0	0	0	0	0	0	0.00546448	0	0	0	0	0	0	0	0	0	0	0	0	0	0	0	0	0	0	0	0	0	0	0	0	0	0	0	0	0	0
Bacillus_glycinifermentans	0	0	0	0	0	0	0	0	0	0	0	0	0	0	0	0	0	0	0	0	0	0	0	0	0	0	0	0	0	0	0	0	0	0	0	0	0	0	0	0	0	0	0	0	0	0	0	0	0
Bacillus_gottheilii	0	0	0	0	0	0	0	0	0	0	0	0	0	0	0	0	0	0	0	0	0	0	0	0	0	0	0	0	0	0	0	0	0	0	0	0	0	0	0	0	0	0	0	0	0	0	0	0	0
Bacillus_halosaccharovorans	0	0	0	0	0	0	0	0	0	0	0	0	0	1.95191e-05	0	0	0	0	0	0	0	0	0	0	0	0	0	0	0	0	0	0	0	0	0	0	0	0	0	0	0	0	0	0	0	0	0	0	0
Bacillus_hemicellulosilyticus	0	0	0	0	0	0	0	0	0	0	0	0	0	0	0	0	0	0	0	0	0	0	0	0	0	0	0	0	0	0	0	0	0	0	0	0	0	0	0	0	0	0	0	0	0	0	0	0	0
Bacillus_hisashii	0	0	0	0	0.000178031	0.000615536	0	0	0	0.00172502	0	0	0	0	0	0	0.00107991	0	0	4.3018e-06	0.0314136	0	0	0	0	0	0	0	0	0.00105857	0	0	0	0	0	0	0	0	0.000337553	0	0	0	2.44147e-05	0.000133191	0	0	0	0	0
Bacillus_horikoshii	0	0	0	0	0	0	0	0	0	0	0	0	0	0	0	0	0	0	0	0	0	0	0	0	0	0	0	0	0	0	0	0	0	0	0	0	0	0	0	0	0	0	0	0	0	0	0	0	0
Bacillus_horneckiae	0	0	0	0	0	0	0	0	0	0	0	0	0	0	0	0	0	0	0	0	0	0	0	0	0	0	0	0	0	0	0	0	0	0	0	0	0	0	0	0	0	0	0	0	0	0	0	0	0
Bacillus_indicus	0	0	0	0	0	0	0	0	0	0	0	0	0	0	0	0	0	0	0	0	0	0	0	0	0	0	0	0	0	0	0	0	0	0	0	0	0	0	0	0	0	0	0	0	0	0	0	0	0
Bacillus_infantis	0	0	0	0	0	0	0	0	0	0	0	0	0	0	0	0	0	0	0	0	0	0	0	0	0	0	0	0	0	0	0	0	0	0	0	0	0	0	0	0	0	0	0	0	0	0	0	0	0
Bacillus_intestinalis	0	0	0	0	0	0	0	0	0	0	0	0	0	0	0	0	0	0	0	0	0	0	0	0	0	0	0	0	0	0	0	0	0	0	0.000214707	0	0	0	0	0	0	0	0	0	0	0	0	0	0
Bacillus_kochii	0	0	0	0	0	0	0	0	0	0	0	0	0	0	0	0	0	0	0	0	0	0	0	0	0	0	0	0	0	0	0	0	0	0	0	0	0	0	0	0	0	0	0	0	0	0	0	0	0
Bacillus_korlensis	0	0	0	0	0	0	0	0	0	0	0	0	0	0	0	0	0	0	0	0	0	0	0	0	0	0	0	0	0	0	0	0	0	0	0	0	0	0	0	0	0	0	0	0	0	0	0	0	0
Bacillus_kwashiorkori	0	0	0	0	0	0	0	0	0	0	0	0	0	0	0	0	0	0	0	0	0	0	0	0	0	0	0	0	0	0	0	0	0	0	0	0	0	0	0	0	0	0	0	0	0	0	0	0	0
Bacillus_kyonggiensis	0	0	0	0	0	0	0	0	0	0	0	0	0	0	0	0	0	0	0	0	0	0	0	0	0	0	0	0	0	0	0	0	0	0	0	0	0	0	0	0	0	0	0	0	0	0	0	0	0
Bacillus_licheniformis	0	0	0	0	0	0	0	0	0	0	0	0	0	0	0	0	0	0	0	0	0	0	0	0	0	0	0	0	0	0	2.43635e-05	0	0	0	0	0	0	0	0	0	0	0	0	0	0	0	0	0	0
Bacillus_litoralis	0	0	0	0	0	0	0	0	0	0	0	0	0	0	0	0	0	0	0	0	0	0	0	0	0	0	0	0	0	0	0	0	0	0	0	0	0	0	0	0	0	0	0	0	0	0	0	0	0
Bacillus_loiseleuriae	0	0	0	0	0	0	0	0	0	0	0	0	0	0	0	0	0	0	0	0	0	0	0	0	0	0	0	0	0	0	0	0	0	0	0	0	0	0	0	0	0	0	0	0	0	0	0	0	0
Bacillus_luti	0	0	0	0	0	0	0	0	0	0	0	0	0	0	0	0	0	0	0	0	0	0	0	0	0	0	0	0	0	0	0	0	0	0	0	0	0	0	0	0	0	0	0	0	0	0	0	0	0
Bacillus_marasmi	0	0	0	0	0	0	0	0	0	0	0	0	0	0	0	0	0	0	0	0	0	0	0	0	0	0	0	0	0	0	0	0	0	0	0	0	0	0	0	0	0	0	0	0	0	0	0	0	0
Bacillus_massiliglaciei	0	0	0	0	0	0	0	0	0	0	0	0	0	0	0	0	0	0	0	0	0	0	0	0	0	0	0	0	0	0	0	0	0	0	0	0	0	0	0	0	0	0	0	0	0	0	0	0	0
Bacillus_massiliogorillae	0	0	0	0	0	0	0	0	0	0	0	0	0	0	0	0	0	0	0	4.3018e-06	0	0	0	0	0	0	0	0	0	0	0	0	0	0	0	0	0	0	0	0	0	0	0	0	0	0	0	0	0
Bacillus_massiliosenegalensis	0	0	0	0	0	0	0	0	0	0	0	0	0	0	0	0	0	0	0	0	0	0	0	0	0	0	0	0	0	0	0	0	0	0	0	0	0	0	0	0	0	0	0	0	0	0	0	0	0
Bacillus_megaterium	0	0	0	0	0	0	0	0	0	0	0	0	0	0	0	0	0	0	0	0	0	0	0	0	0	0	0	0	0	0	0	0	0	0	0.000429415	0	0	0	0	0	0	0	2.44147e-05	0	0	0	0	0	0
Bacillus_mobilis	0	0	0	0	0	0	0	0	0	0	0	0	0	0	0	0	0	0	0	0	0	0	0	0	0	0	0	0	0	0	0	0	0	0	0	0	0	0	0	0	0	0	0	0	0	0	0	0	0
Bacillus_nanhaiisediminis	0	0	0	0	0	0	0	0	0	0	0	0	0	0	0	0	0	0	0	4.3018e-06	0	0	0	0	0	0	0	0	0	0	0	0	0	0	0	0	0	0	0	0	0	0	0	0	0	0	0	0	0
Bacillus_nealsonii	0	0	0	0	0	0	0	0	0	0	0	0	0	1.95191e-05	0	0	0	0	0.00546448	0	0	0	0	0	0	0	0	0	0.000107724	0	0	0	0	0	0	0	0	0	0	0	0	0	0	0	0	0	0	0	0
Bacillus_niacini	0	0	0	0	0	0	0	0	0	0	0	0	0	0	0	0	0	0	0	0	0	0	0	0	0	0	0	0	0	0	0	0	0	0	0	0	0	0	0	0	0	0	0	0	0	0	0	0	0
Bacillus_notoginsengisoli	0	0	0	0	0	0	0	0	0	0	0	0	0	0	0	0	0	0	0	0	0	0	0	0	0	0	0	0	0	0	0	0	0	0	0	0	0	0	0	0	0	0	0	0	0	0	0	0	0
Bacillus_obstructivus	0	0.000116259	0	0	0	0.000246214	0	0	0	0.000127779	0	0	0	0	0	0	0	0	0	0	0	0.000112549	0	0	0	0	0	0	0	0.00176429	2.43635e-05	0	0	0	0	0	0	0	0.000337553	0	0	0	0	0	0	0	0	0	0
Bacillus_oleivorans	0	0	0	0	0.000178031	0	0	0	0	0	0	0	0	0	0	0	0	0	0	0	0	0	0	0	0	0	0	0	0	0	0	0	0	0	0	0	0	0	0	0	0	0	0	0	0	0	0	0	0
Bacillus_oleronius	0	0	0	0	0	0	0	0	0	0	0	0	0	0	0	0	0	0	0	0	0	0	0	0	0	0	0	0	0	0	0	0	0	0	0	0	0	0	0	0	0	0	0	0	0	0	0	0	0
Bacillus_onubensis	0	0	0	0	0	0	0	0	0	0	0	0	0	0	0	0	0	0	0	4.3018e-06	0	0	0	0	0	0	0	0	0	0	0	0	0	0	0	0	0	0	0	0	0	0	0	0	0	0	0	0	5.57491e-05
Bacillus_patagoniensis	0	0	0	0	0	0	0	0	0	0.000127779	0	0	0	0	0	0	0	0	0	0	0	0	0	0	0	0	0	0	0	0	0	0	0	0	0	0	0	0	0	0	0	0	2.44147e-05	0	0	0	0	0	0
Bacillus_praedii	0	0	0	0	0	0	0	0	0	0	0	0	0	0	0	0	0	0	0	0	0	0	0	0	0	0	0	0	0	0	0	0	0	0	0	0	0	0	0	0	0	0	0	0	0	0	0	0	0
Bacillus_pumilus	0	0	0	0	0	0	0	0	0	0	0	0	0	0	0	0	0	0	0	0	0	0	0	0	0	0	0	0	0	0	0	0	0	0	0	0	0	0	0	0	0	0	0	0	0	0	0	0	0
Bacillus_safensis	0	0	0	0	0	0	0	0	0	0	0	0	0	0	0	0	0	0	0	0	0	0	0	0	0	0	0	0	0	0	0	0	0	0	0	0	0	0	0	0	0	0	0	0	0	0	0	0	0
Bacillus_salarius	0	0	0	0	0	0	0	0	0	0	0	0	0	0	0	1.3294e-05	0	0	0	0	0	0	0	0	0	0	0	0	0	0	0	0	0	0	0	0	0	0	0	0	0	0	0	0	0	0	0	0	0
Bacillus_shackletonii	0	0	0	0	0	0	0	0	0	0	0	0	0	0	0	0	0	0	0	4.3018e-06	0	0	0	0	0	0	0	0	0	0	0	0	0	0	0	0	0	0	0	0	0	0	0	0	0	0	0	0	0
Bacillus_simplex	0	0	0	0	0	0	0	0	0	0	0	0	0	0	0	0	0	0	0	0	0	0	0	0	0	0	0	0	0	0	0	0	0	0	0	0	0	0	0	0	0	0	0	0	0	0	0	0	0
Bacillus_siralis	0	0	0	0	0	0	0	0	0	0	0	0	0	0	0	0	0	0	0	0	0	0	0	0	0	0	0	0	0	0	0	0	0	0	0	0.00300752	0	0	0	0	0	0	0	0	0	0	0	0	0
Bacillus_smithii	0	0	0	0	0	0	0	0	0	0	0	0	0	0	0	0	0	0	0	0	0	0	0	0	0	0	0	0	0	0	0	0	0	0	0	0	0	0	0	0	0	0	0	0	0	0	0.000554324	0	0
Bacillus_sporothermodurans	0	0	0	0	0	0	0	0	0	0	0	0	0	0	0	0	0	0	0	0	0	0	0	0	0	0	0	0	0	0.000705716	0	0	0	0	0	0	0	0	0	0	0	0	0	0	0	0	0	0	0
Bacillus_subterraneus	0	0	0	0	0	0	0	0	0	0	0	0	0	0	0	0	0	0	0	0	0	0	0	0	0	0	0	0	0	0	0	0	0	0	0	0	0	0	0	0	0	0	0	0	0	0	0	0	0
Bacillus_subtilis	0	0	0	0	0	0	0	0	0	0	0	0	0	0	0	0	0	0	0	0	0	0	0	0	0	0	0	0	0.000269309	0	0	0	0	0	0	0	0	0	0	0	0	0	0	0	0	0	0	0	0
Bacillus_taxi	0	0	0	0	0	0	0	0	0	0	0	0	0	0	0	0	0	0	0	0	0	0	0	0	0	0	0	0	0	0	0	0	0	0	0	0	0	0	0	0	0	0	0	0	0	0	0	0	0
Bacillus_thermoamylovorans	0	0	0	0	0	0	0	0.00548446	0	0.000958344	0.000130225	0	0	0	0	0	0	0	0.00546448	4.3018e-06	0.0157068	0.000112549	0	0	0	0	0	0	0	0	0	0	0	0	0	0	0	0	0	0	0	0	0	0	0	0	0	0	0
Bacillus_thermocopriae	0	0	0	0	0	0	0	0	0	0	0	0	0	0	0	0	0	0	0	0	0.00104712	0	0	0	0	0	0	0	0	0	0	0	0	0	0	0	0	0	0.000337553	0	0	0.0197628	0	0	0	0	0	0	0
Bacillus_timonensis	0	0	0	0	0	0	0	0	0	0	0	0	0	0	0	0	0	0	0	0	0	0	0	0	0	0	0	0	0	0	0	0	0	0	0	0	0	0	0	0	0	0	0	0	0	0	0	0	0
Bacillus_wakoensis	0	0	0	0	0	0	0	0	0	0	0	0	0	0	0	0	0	0	0	0	0	0	0	0	0	0	0	0	0	0	0	0	0	0	0	0	0	0	0	0	0	0	0	0	0	0	0	0	0
Bacillus_weihaiensis	0	0	0	0	0	0	0	0	0	0	0	0	0	0	0	0	0	0	0	0	0	0	0	0	0	0	0	0	0	0	0	0	0	0	0	0	0	0	0	0	0	0	2.44147e-05	0	0	0	0	0	0
Bacillus_wudalianchiensis	0	0	0	0	0	0	0	0	0	0	0	0	0	0	0	0	0	0	0	0	0	0	0	0	0	0	0	0	0	0	0	0	0	0	0	0	0	0	0	0	0	0	0	0	0	0	0	0	0
Bacteroides_caccae	0	0	0	0	0	0	0.000448163	0	0	0.000127779	0	0	0	0	0	3.98819e-05	0	0	0	4.3018e-06	0	0	0	0	0	0	0	0	0	0.000705716	0	0	0	0	0.000214707	0	0	0	0	0	0	0	0	0	0	0	0	0	0
Bacteroides_cellulosilyticus	0	0.000116259	0	0	0	0.000615536	0.0011951	0	0	0.0012139	0.000130225	0	0	0	0	0	0	0	0	0	0.00104712	0	0	0	0	0	0	0	0	0	0	0	0	3.15471e-05	0.000429415	0	0	0	0.000506329	0.000342661	0	0	2.44147e-05	0	0	0	0.000554324	0	0.000209059
Bacteroides_clarus	0	0	0	0	0	0	0	0	0	0	0	0	0	0	0	0	0	0	0	0	0	0	0	0	0	0	0	0	0	0	0	0	0	0	0	0	0	0	0	0	0	0	0	0	0	0	0	0	5.57491e-05
Bacteroides_coprocola	0	0	0	0	0.000178031	0	0	0	0	0	0	0	0	0	0	0	0	0	0	0	0	0	0	0	0	0	0	0	0	0	0	0	0	0	0	0	0	0	0	0	0	0	0	0	0	0	0	0	5.57491e-05
Bacteroides_coprophilus	0	0	0	0	0	0	0	0	0	0	0.000130225	0	0	0	0	0	0	0	0	0	0	0	0	0	0	0	0	0	0	0	0	0	0	0	0	0	0	0	0	0	0	0	0	0	0	0	0	0	0
Bacteroides_dorei	0	0	0.00299401	0	0	0.000246214	0	0	0	0	0	0	0	0	0	0	0	0	0	4.3018e-06	0	0	0	0	0	0	0	0	0	0	0	0	0	1.21335e-05	0	0	0	0	0	0	0	0	0	0	0	0	0	0	0.000209059
Bacteroides_eggerthii	0	0	0	0	0	0.000246214	0.000298775	0.00548446	0	0.000127779	0.000130225	0	0	0	0	0	0	0	0	0	0	0	0	0	0	0	5.36265e-05	0	0	0	0	0	0	0	0	0	0	0	0	0	0	0	0	0	0	0	0	0	0.000111498
Bacteroides_faecis	0	0	0	0	0	0	0	0	0	0	0	0	0	0	0	0	0	0	0	0	0	0	0	0	0	0	0	0	0	0	0	0	0	0	0	0	0	0	0.000337553	0	0	0	0	0	0	0	0	0	0
Bacteroides_finegoldii	0	0	0	0	0	0	0	0	0	0.000127779	0.000390676	0	0	0	0	1.3294e-05	0	0	0	0	0	0	0	0	0	0	0.00249363	0	0	0	0	0	0	0	0	0	0	0	0	0	0	0	0	0	0	0	0	0	0
Bacteroides_fluxus	0	0	0	0	0	0	0	0	0	0	0	0	0	0	0	0	0	0	0	0	0	0	0	0	0	0	0.000107253	0	0	0	0	0	0	0	0	0	0	0	0	0	0	0	0	0	0	0	0	0	0
Bacteroides_fragilis	0	0	0	0	0	0.000246214	0	0	0	0.000511117	0	0	0	0	0	1.3294e-05	0	0	0	0	0	0	0	0	0	0	0.000107253	0	0	0.000705716	0	0	0	0	0	0	0	0	0	0	0	0	2.44147e-05	0	0	0	0	0	5.57491e-05
Bacteroides_helcogenes	0	0	0	0	0	0	0	0	0	0	0.000390676	0	0	0	0	0	0	0	0	0	0	0	0	0	0	0	0.000134066	0	0	0	0	0	0	0	0	0	0	0	0	0	0	0	0	0	0	4.43577e-05	0	0	0
Bacteroides_ihuae	0	0	0	0	0	0	0	0	0	0.000127779	0	0	0	0	0	0	0	0	0	0	0	0	0	0	0	0	0	0	0	0	0	0	0	0	0	0	0	0	0	0	0	0	0	0	0	0	0	0	0
Bacteroides_intestinalis	0	0	0	0	0	0.000246214	0.000298775	0	0	0.000255558	0	0	0	0	0	2.6588e-05	0	0	0	4.3018e-06	0	0	0	0	0	0	5.36265e-05	0	0	0	0	0	0	0	0	0	0	0	0	0	0	0	0	0	0.016129	0	0	0	0
Bacteroides_massiliensis	0	0	0	0	0	0	0.000298775	0	0	0.000127779	0	0	0	0	0	0	0	0	0	0	0	0	0	0	0	0	5.36265e-05	0	0	0	0	0	0	0	0.000214707	0	0	0	0	0	0	0	0	0	0	0	0	0	5.57491e-05
Bacteroides_neonati	0	0	0	0	0	0	0	0	0	0	0	0	0	0	0	0	0	0	0	0	0	0	0	0	0	0	0	0	0	0	0	0	0	0	0	0	0	0	0	0	0	0	0	0	0	0	0	0	0
Bacteroides_nordii	0	0	0	0	0	0	0	0	0	0	0	0	0	0	0	0	0	0	0	0	0	0	0	0	0	0	0	0	0	0	0	0	0	0	0	0	0	0	0	0	0	0	0	0	0	0	0	0	0
Bacteroides_ovatus	0	0	0	0	0	0	0	0	0	0.000255558	0	0	0	0	0	0	0	0	0	0	0	0	0	0	0	0	0	0	0	0	0	3.56043e-05	0	0	0	0	0	0	0.00118143	0	0	0	0	0	0	0	0	0	0.000362369
Bacteroides_plebeius	0	0	0	0	0	0.000492429	0.000298775	0	0	0	0	0	0	0	0	0	0	0	0	0	0	0	0	0	0	0	0	0	0.000215448	0	3.65453e-05	0	0	0	0.000644122	0	0	0	0	0	0	0	0	0	0	0	0	0	0.000111498
Bacteroides_propionicifaciens	0	0	0	0	0	0.000246214	0	0	0	0.000127779	0	0	0	0	0	0	0	0	0	0	0	0	0	0	0	0	0	0	0	0	0	0	0	0	0	0	0	0	0	0	0	0	0	0	0	0	0	0	0
Bacteroides_pyogenes	0	0	0	0	0	0.000246214	0	0	0	0	0.00130225	0	0	0	0	3.98819e-05	0	0	0	1.72072e-05	0	0	0	0	0	0	0.000965277	0	0	0	0	0	0	7.2801e-06	0	0	0	0	0.000337553	0	0	0	0	0	0	1.47859e-05	0	0	0
Bacteroides_salanitronis	0	0	0	0	0	0	0	0	0	0.000127779	0	0	0	0	0	0	0	0	0	0	0	0	0	0	0	0	0	0	0	0	0	0	0	0	0	0	0	0	0	0	0	0	0	0	0	0	0	0	0
Bacteroides_salyersiae	0	0	0	0	0	0	0	0	0	0.000127779	0	0	0	0	0	0	0	0	0	0	0	0	0	0	0	0	0	0	0	0	0	0	0	4.8534e-06	0	0	0	0	0	0	0	0	0	0	0	0	0	0	0
Bacteroides_stercoris	0	0	0	0	0	0.000492429	0	0	0	0.000127779	0.000130225	0	0	0	0	0	0	0	0	0	0	0	0	0	0	0	0.000214506	0	0	0	0	0	0	7.2801e-06	0	0	0	0	0	0	0	0	8.54513e-05	0	0	0	0.000554324	0	0.00030662
Bacteroides_thetaiotaomicron	0	0	0	0	0	0.000492429	0.000448163	0	0	0.000127779	0.000260451	0	0	0	0	2.6588e-05	0	0	0	0	0	0	0	0	0	0	5.36265e-05	0	0	0	0	3.56043e-05	0	0	0	0	0	0	0.000337553	0	0	0	0	0	0	0	0	0	0.000250871
Bacteroides_uniformis	0	0.000116259	0.00449102	0	0	0.00320079	0	0.00548446	0	0	0.000651126	0	0	0	0	3.98819e-05	0	0	0	8.60359e-06	0	0	0	0	0	0	0.00150154	0	0	0.00352858	0	3.56043e-05	0	0	0.00161031	0	0.00328947	0	0.00101266	0	0	0	0	0	0	0	0	0	0.0017561
Bacteroides_vulgatus	0	0	0	0	0	0.00123107	0.000448163	0	0	0.000127779	0	0	0	0	0	5.31759e-05	0	0	0	0	0	0	0	0	0	0	0.000294946	0	0	0.00141143	0	0	0	7.52277e-05	0.000214707	0	0	0	0	0	0	0	0	0	0.016129	0	0	0	0.000710801
Bacteroides_xylanisolvens	0	0	0	0	0.000178031	0.000246214	0	0	0	0	0	0	0	0	0	0	0	0	0	0	0	0	0	0	0	0	0.000107253	0	0	0	0	0	0	0	0	0	0	0	0	0	0	0	0	0	0	0	0	0	0.00030662
Balneola_vulgaris	0	0	0	0	0	0	0	0	0	0.000127779	0	0	0	0	0	0	0	0	0	0	0	0	0	0	0	0	0	0	0	0	0	0	0	0	0	0	0	0	0	0	0	0	0	0	0	0	0	0	0
Bariatricus_massiliensis	0	0	0	0	0	0	0	0	0	0	0	0	0	0	0	0	0	0	0	0	0	0	0	0	0	0	0	0	0	0	0	0	0	0	0	0	0	0	0	0	0	0	0	0	0	0	0	0	0
Barnesiella_intestinihominis	0	0	0	0	0	0.000246214	0	0	0	0.000127779	0	0	0	0	0	0	0	0	0	0	0	0	0	0	0	0	0	0	0.000107724	0	0	0	0	0	0	0	0	0	0	0	0	0	0	0	0	0	0	0	5.57491e-05
Bauldia_litoralis	0	0	0	0	0	0	0	0	0	0	0	0	0	0	0	0	0	0	0	0	0	0	0	0	0	0	0	0	0	0	0	0	0	0	0	0.00300752	0	0	0	0	0	0	0	0	0	0	0	0	0
Bdellovibrio_bacteriovorus	0	0	0	0	0	0	0	0	0	0.000255558	0	0	0	0	0	0	0	0	0	0	0	0	0	0	0	0	0	0	0	0	0	0	0	0	0	0	0	0	0	0	0	0	0	0	0	0	0	0	0
Bdellovibrio_exovorus	0	0	0	0	0	0	0	0	0	0	0	0	0	0	0	0	0	0	0	0	0	0	0	0	0	0	0	0	0	0	0	0	0	0	0	0	0	0	0	0	0	0	0	0	0	0	0	0	0
BeAn_58058_virus	0.0107015	0	0	0.0336134	0	0	0.000298775	0	0	0	0	0	0	0	0	0	0.00107991	0	0	0	0	0	0	0	0	0	0	2.87886e-05	0	0	0	0	0.00129492	1.45602e-05	0.000214707	0	0	0	0	0	0.00231054	0	0	0	0.0483871	0	0	0	0
Beduini_massiliensis	0	0	0	0	0	0	0	0	0	0	0	0	0	0	0	0	0	0	0	0	0	0	0	0	0	0	0	0	0	0	0	0	0	0	0	0	0	0	0.000337553	0	0	0	0	0	0	0	0	0	0
Belliella_baltica	0	0	0	0	0	0	0	0	0	0	0	0	0	0	0	0	0	0	0	0	0	0	0	0	0	0	0	0	0	0	0	0	0	0	0	0	0	0	0	0	0	0	0	0	0	0	0	0	0
Belnapia_moabensis	0	0	0	0	0	0	0	0	0	0.000383338	0	0	0	0	0	0	0	0	0	0	0	0	0	0	0	0	0	0	0	0	0	0	0	0	0	0	0	0	0	0	0	0	0	0	0	0	0	0	5.57491e-05
Bergeriella_denitrificans	0	0	0	0	0	0	0	0	0	0	0	0	0	0	0	0	0	0	0	0	0	0	0	0	0	0	0	0	0	0	0	0	0	4.8534e-06	0	0	0	0	0	0	0	0	0	0	0	0	0	0	0
Bergeyella_zoohelcum	0	0	0	0	0	0	0	0	0	0	0	0	0	0	0	0	0	0	0	0	0	0	0	0	0	0	0	0	0	0	0	0	0	0	0	0	0	0	0	0	0	0	0	0	0	0	0	0	0
Beutenbergia_cavernae	0	0	0	0	0	0	0	0	0	0.000127779	0	0	0	0	0	0	0	0	0	0	0	0	0	0	0	0	0	0	0	0	0	0	0	0	0	0	0	0	0	0	0	0	0	0	0	0	0	0	0
Bifidobacterium_adolescentis	0	0	0	0	0	0.000246214	0.000448163	0	0	0.000511117	0	0	0	0	0	0	0	0	0	2.1509e-05	0	0	0	0	0	0	0	0	0	0.000705716	0	3.56043e-05	0	0	0.000214707	0	0	0	0.000337553	0	0	0	0.000122073	0	0	0	0	0	5.57491e-05
Bifidobacterium_angulatum	0	0	0	0	0	0	0	0	0	0	0	0	0	0	0	0	0	0	0	0	0	0	0	0	0	0	0	0	0	0	0	0	0	0	0	0	0	0	0	0	0	0	2.44147e-05	0	0	0	0	0	0
Bifidobacterium_animalis	0.0059453	0	0	0	0.000178031	0	0	0	0	0	0	0	0	0	0	0	0	0	0	0	0	0	0	0	0	0	0	0	0	0	0	0	0	0	0	0	0	0	0	0	0	0	0	0	0	0	0	0	0
Bifidobacterium_bifidum	0	0	0	0	0	0	0	0	0	0	0	0	0	0	0	0	0	0	0	0	0	0	0	0	0	0	0	0	0	0	0	0	0	0	0	0	0	0	0	0	0	0	0	0	0	0	0	0	0
Bifidobacterium_breve	0	0	0	0	0	0	0	0	0	0	0	0	0	0	0	0	0	0	0	0	0	0	0	0	0	0	0	0	0	0	0	0	0	0	0.00450886	0	0	0	0	0	0	0	0	0	0	0	0	0	0
Bifidobacterium_catenulatum	0	0	0	0	0	0	0	0	0	0	0	0	0	0	0	0	0	0	0	4.3018e-06	0	0	0	0	0	0	0	0	0	0	0	0	0	0	0	0	0	0	0	0	0	0	0	0	0	0	0	0	0
Bifidobacterium_dentium	0	0	0	0	0	0	0	0	0	0.000127779	0	0	0	0	0	0	0	0	0	0.00870684	0	0	0	0.00530504	0	0	0	0	0.00301627	0.0130558	0	0.000231428	0	8.9788e-05	0	0	0	0	0	0	0	0	0	0	0	4.43577e-05	0	0	0
Bifidobacterium_gallicum	0	0	0	0	0	0	0	0	0	0	0	0	0	0	0	0	0	0	0	0	0	0	0	0	0	0	0	0	0	0	0	0	0	0	0	0	0	0	0	0	0	0	0	0	0	0	0	0	0
Bifidobacterium_gallinarum	0	0	0	0	0	0	0	0	0	0	0	0	0	0	0	0	0	0	0	0	0	0	0	0	0	0	0	0	0	0	0	0	0	0	0	0	0	0	0	0	0	0	0	0	0	0	0	0	0
Bifidobacterium_longum	0	0	0	0	0	0.000246214	0.000298775	0	0	0.000127779	0	0	0	0	0	0	0	0	0	0	0	0	0	0	0	0	0	0	0	0.000705716	0	0.000551867	0	0	0	0	0	0	0	0	0	0	2.44147e-05	0	0	0	0	0	0
Bifidobacterium_pseudocatenulatum	0	0	0	0	0	0	0	0	0	0	0	0	0	0	0	0	0	0	0	0	0	0	0	0	0	0	0	0	0	0	0	0	0	0	0	0	0	0	0	0	0	0	2.44147e-05	0	0	0	0	0	5.57491e-05
Bifidobacterium_pseudolongum	0	0	0	0	0.000267046	0.000492429	0.000448163	0	0	0.000127779	0	0	0	0	0	0	0	0	0	0	0	0	0	0	0	0	0	0	0	0	2.43635e-05	0	0	0	0	0	0	0	0	0	0	0	0.000280769	0	0	0	0	0	5.57491e-05
Bifidobacterium_thermophilum	0	0	0	0	0.00249243	0.00775576	0.016582	0	0	0.000127779	0	0	0	0.000175671	0	0	0	0	0	0	0	0	0	0	0	0	0	1.15154e-05	0	0.00141143	2.43635e-05	0	0	0	0.0013956	0	0	0	0	0	0	0.126482	0.00892356	0	0	1.47859e-05	0.000554324	0	0.00229965
Bilophila_wadsworthia	0	0	0	0	0	0	0	0	0	0.000127779	0	0	0	0	0	0	0	0	0	0	0	0	0	0	0	0	0	0	0	0.00176429	0	0	0	0	0.000214707	0	0	0	0	0	0	0	0	0	0	0	0	0	0
Bipolaris_maydis	0	0	0	0	0	0	0	0	0	0	0	0	0	0	0	0	0	0	0	0	0	0	0	0	0	0	0	0	0	0	0	0	0	0	0	0	0	0	0	0	0	0	0	0	0	0	0	0	0
Bipolaris_sorokiniana	0	0	0	0	0	0	0	0	0	0	0	0	0	0	0	0	0	0	0	0	0	0	0	0	0	0	0	0	0	0	0	0	0	0	0	0	0	0	0	0	0	0	0	0	0	0	0	0	0
Bizionia_argentinensis	0	0	0	0	0	0	0	0	0	0	0	0	0	0	0	0	0	0	0	0	0	0	0	0	0	0	0	0	0	0	0	0	0	0	0	0	0	0	0	0	0	0	0	0	0	0	0	0	0
Blastochloris_viridis	0	0	0	0	0	0	0.000298775	0	0	0	0	0	0	0	0	0	0	0	0	0	0	0	0	0	0	0	0	0	0	0	0	0	0	0	0	0	0	0	0	0	0	0	0	0	0	0	0	0	0
Blastococcus_endophyticus	0	0	0	0	0	0	0	0	0	0.000255558	0	0	0	0	0	0	0	0	0	0	0	0	0	0	0	0	0	0	0	0	0	0	0	0	0	0	0	0	0	0	0	0	0	0	0	0	0	0	0
Blastococcus_saxobsidens	0	0	0	0	0	0	0	0.00548446	0	0.000255558	0	0	0	0	0	0	0	0	0	0	0	0	0	0	0	0	0	0	0	0	0	0	0	0	0.000214707	0	0	0	0.000337553	0	0	0	0	0	0	0	0	0	0
Blastocystis_hominis	0	0	0	0	0	0	0	0	0	0	0	0	0	0	0	0	0	0	0	0	0	0	0	0	0	0	0	0	0	0	0	0	0	0	0	0	0	0	0	0	0	0	0	0	0	0	0	0	0
Blastomyces_percursus	0	0	0	0	0	0	0	0	0	0	0	0	0	3.90381e-05	0	0	0	0	0	0	0	0	0	0	0	0	0	0	0	0	0	0	0	0	0	0	0	0	0	0	0	0	0	0	0	0	0	0	0
Blautia_hansenii	0	0	0	0	0	0	0	0	0	0.000127779	0	0	0	0	0	0	0	0	0	0	0	0	0	0	0	0	0	0	0	0	0	0	0	0	0	0	0	0	0	0	0	0	0	0	0	0	0	0	0
Blautia_hydrogenotrophica	0	0	0	0	0	0	0	0	0	0	0	0	0	0	0	0	0	0	0	4.3018e-06	0	0	0	0	0	0	0	0	0	0	0	0	0	2.18403e-05	0	0	0	0	0	0	0	0	0	0	0	0	0	0	0
Blautia_obeum	0	0	0	0	0	0.000246214	0.000448163	0	0	0	0	0	0	0	0	1.3294e-05	0	0	0	0	0	0	0	0	0	0	0	0	0	0.000705716	0	0	0	0	0	0	0	0	0	0	0	0	8.54513e-05	0	0	0	0	0	0
Blautia_producta	0	0	0	0	0	0	0	0	0	0	0	0	0	0	0	1.3294e-05	0	0	0	0	0	0	0	0	0	0	0	0	0	0	0	0	0	0	0	0	0	0	0.000506329	0	0	0	0	0	0	0	0	0	0
Blautia_wexlerae	0	0	0	0	0	0	0	0	0	0	0	0	0	0	0	0	0	0	0	0	0	0	0	0	0	0	0	0	0	0.000705716	0	0	0	0	0.000214707	0	0	0	0	0	0	0	6.10366e-05	0.000133191	0	0	0	0	0
Bombyx_mori_nucleopolyhedrovirus	0.00118906	0	0	0	0	0	0	0	0	0	0	0	0	0	0	0	0	0	0	0	0	0	0	0	0	0	0	0	0	0	0	0	0	0	0	0	0	0	0	0	0	0	0	0	0	0	0	0	0
Bordetella_avium	0	0	0	0	0	0	0	0	0	0.000511117	0	0	0	1.95191e-05	0	0	0	0	0	1.29054e-05	0.00209424	0	0	0	0	0	0	0	0	0.00105857	0	0	0	0	0.000214707	0	0	0	0	0	0	0	0	0	0	0	0	0	0
Bordetella_bronchialis	0	0	0	0	0	0	0	0	0	0	0	0	0	0	0	0	0	0	0	0	0	0	0	0	0	0	0	0	0	0	0	0	0	0	0	0	0	0	0	0	0	0	0	0	0	0	0	0	0
Bordetella_bronchiseptica	0	0	0	0	0	0	0.000298775	0	0	0	0	0	0	0	0	0	0	0	0	0	0	0.000112549	0	0	0	0	0	0	0	0	0	0	0	0	0	0	0	0	0	0	0	0	0	0	0	0	0	0	0
Bordetella_flabilis	0	0	0	0	0	0	0	0	0	0	0	0	0	0	0	0	0	0	0	0	0	0	0	0	0	0	0	0	0	0	0	0	0	0	0	0	0	0	0	0	0	0	0	0	0	0	0	0	0
Bordetella_hinzii	0	0	0	0	0.00097917	0	0	0	0	0.0012139	0	0	0	1.95191e-05	0	0	0	0	0	0	0.00418848	0	0	0	0	0	0	0	0	0	0	0	0	0	0	0	0	0	0.000675105	0	0	0	0	0.000133191	0	0	0	0	0
Bordetella_holmesii	0	0	0	0	0	0	0	0	0	0	0	0	0	0	0	0	0	0	0	0	0	0	0	0	0	0	0	0	0	0	0	0	0	0	0	0	0	0	0	0	0	0	0	0	0	0	0	0	0
Bordetella_petrii	0	0	0	0	0	0	0	0	0	0.000127779	0	0	0	1.95191e-05	0	0	0	0	0	8.60359e-06	0.00209424	0	0	0	0	0	0	0	0	0	0	0	0	0	0.000429415	0	0	0	0.000506329	0	0	0	0	0	0	0	0	0	0
Bordetella_trematum	0	0	0	0	0	0	0	0	0	0.00146946	0.000130225	0	0	1.95191e-05	0	0	0	0	0	0	0.00104712	0	0	0	0	0	0	0	0	0	0	0	0	0	0	0	0	0	0	0	0	0	2.44147e-05	0	0	0	0	0	5.57491e-05
Bosea_lupini	0	0	0.00299401	0	0.000178031	0	0	0	0	0.000511117	0	0	0	1.95191e-05	0	0	0	0	0	4.3018e-06	0	0.000112549	0	0	0	0	0	0	0	0	6.09088e-05	0	0	0	0.00375738	0	0	0	0	0	0	0	9.76586e-05	0	0	0	0	0	0.000209059
Botrytis_cinerea	0	0	0	0	0	0	0	0	0	0	0	0	0	0	0	0	0	0	0	0	0	0	0	0	0	0	0	0	0	0	0	0	0	0	0	0.00902256	0	0	0	0	0	0	0	0	0	0	0	0	0
Brachybacterium_alimentarium	0	0	0	0	0	0	0	0	0	0	0	0	0	0	0	0	0	0	0	0	0	0	0	0	0	0	0	0	0	0	0	0	0	0	0	0	0	0	0	0	0	0	2.44147e-05	0	0	1.47859e-05	0	0	0
Brachybacterium_faecium	0	0	0	0	0	0	0	0	0	0.000127779	0	0	0	1.95191e-05	0	1.3294e-05	0	0	0	4.3018e-06	0	0	0	0	0	0	0	0	0	0	2.43635e-05	0	0	0	0	0	0	0	0.000675105	0	0	0	2.44147e-05	0	0	0	0	0	0.00015331
Brachybacterium_muris	0	0	0	0	0	0	0.000298775	0	0	0.000255558	0	0	0	0	0	0	0	0	0	4.3018e-06	0	0	0	0	0	0	0	0	0	0	3.65453e-05	0	0	0	0	0	0	0	0.000337553	0	0	0	6.10366e-05	0	0	0	0	0	0.00030662
Brachybacterium_nesterenkovii	0	0	0	0	0	0	0	0	0.00276625	0.000127779	0	0	0	0	0	0	0	0	0	0	0	0	0	0	0	0	0	0	0	0	2.43635e-05	0	0	0	0	0	0	0	0	0	0	0	9.76586e-05	0.000133191	0	0	0	0	0.000250871
Brachymonas_denitrificans	0	0	0	0	0	0	0.000298775	0	0	0	0	0	0	0	0	0	0	0	0	4.3018e-06	0	0	0	0	0	0	0	0	0	0	0	0	0	0	0.000214707	0	0	0	0	0	0	0	0	0	0	0	0	0	5.57491e-05
Bradyrhizobium_japonicum	0	0	0	0	0	0.00123107	0.00059755	0.00548446	0	0.00191669	0	0	0	7.80762e-05	0	0	0	0	0	8.60359e-06	0	0	0	0	0	0	0	0	0	0	0	3.56043e-05	0	0	0	0	0	0	0	0	0	0	0	0	0	0	0.000554324	0	0.000404181
Bradyrhizobium_oligotrophicum	0	0	0	0	0	0	0	0	0	0	0	0	0	0	0	0	0	0	0	0	0	0.000112549	0	0	0	0	0	0	0	0.00388144	0	0	0.000647459	0	0.000644122	0	0	0	0	0	0	0	0	0	0	0	0	0	0
Brevibacillus_agri	0	0	0	0	0	0	0	0	0	0	0	0	0	0	0	0	0	0	0	0	0	0	0	0	0	0	0	0	0	0	0	0	0	0	0.000214707	0	0	0	0	0	0	0	0	0	0	0	0	0	0
Brevibacillus_laterosporus	0	0	0	0	0	0	0	0	0	0	0	0	0	0	0	0	0	0	0	0	0	0	0	0	0	0	0	0	0	0	0	0	0	0	0	0	0	0	0	0	0	0	0	0	0	0	0	0	0
Brevibacillus_panacihumi	0	0	0	0	0	0	0	0	0	0	0	0	0	0	0	0	0	0	0	0	0	0	0	0	0	0	0	0	0	0	0	0	0	0	0	0	0	0	0	0	0	0	0	0	0	0	0	0	0
Brevibacterium_casei	0.00118906	0.000116259	0	0	0	0.00123107	0.00492979	0	0	0.0018528	0.000130225	0	0	0	0	0	0	0	0	1.29054e-05	0.00104712	0.000112549	0	0	0	0	0	0	0	0.00282287	6.09088e-05	3.56043e-05	0	4.8534e-06	0.00332797	0	0	0	0	0	0	0	0.000256354	0	0	0	0	0	0.000808362
Brevibacterium_epidermidis	0	0	0	0	0	0.000615536	0	0	0	0.000638896	0	0	0	0	0	0	0	0	0	0	0	0	0	0	0	0	0	0	0	0.00105857	0	0	0	0	0	0	0	0	0.000337553	0	0	0	6.10366e-05	0	0	0	0	0	0.00015331
Brevibacterium_linens	0	0	0	0	0	0	0.000298775	0	0	0.000255558	0	0	0	0	0	2.6588e-05	0	0	0	3.01126e-05	0.00104712	0	0	0	0	0	0	0	0	0.000705716	0	0	0	0	0	0	0	0	0	0	0	0	4.88293e-05	0	0	0	0	0	0.000250871
Brevibacterium_luteolum	0	0	0	0	0	0	0	0	0	0	0	0	0	0	0	0	0	0	0	0	0.00104712	0	0	0	0	0	0	0	0.000107724	0	0	0	0	0	0	0	0	0	0.000675105	0	0	0	0	0	0	0	0	0	0
Brevibacterium_mcbrellneri	0	0	0	0	0.000178031	0.000246214	0	0	0	0.000127779	0	0	0	3.90381e-05	0	0	0	0	0	0	0	0	0	0	0	0	0	0	0	0	0	0	0	7.2801e-06	0	0	0	0	0	0	0	0	2.44147e-05	0	0	0	0	0	0.000557491
Brevibacterium_ravenspurgense	0	0	0	0	0.000178031	0.000615536	0	0	0	0.000127779	0	0	0	0	0	0	0	0	0	0	0	0	0	0	0	0	0	0	0	0	0	0	0	0	0.000214707	0	0	0	0	0	0	0	0	0	0	0	0	0	0.000111498
Brevibacterium_senegalense	0	0	0	0	0	0	0	0	0	0.000127779	0	0	0	0	0	0	0	0	0	0	0	0	0	0	0	0	0	0	0	0	0	0	0	0	0.000214707	0	0	0	0.000506329	0	0	0	0	0	0	0	0	0	0.000752613
Brevundimonas_diminuta	0	0	0	0	0	0.000492429	0.000746938	0	0.00276625	0	0	0	0	0	4.2996e-05	3.98819e-05	0	0	0.00546448	1.29054e-05	0.00104712	0.000112549	0	0	0	0	0	0	0	0.00741002	0.000109636	0	0	0	0.0041868	0.00300752	0	0	0	0	0	0.0118577	0.00018311	0	0	0	0	0	0.000362369
Brevundimonas_subvibrioides	0	0	0.00299401	0.0168067	0	0.000246214	0	0	0	0.000511117	0	0	0	0	0	0	0	0	0	0	0	0	0	0	0	0	0	0	0	0.00282287	2.43635e-05	5.34064e-05	0	0	0.00214707	0.00300752	0	0	0	0	0	0	2.44147e-05	0	0	0	0	0	5.57491e-05
Brevundimonas_vesicularis	0	0	0	0	0	0.000492429	0.00059755	0.00548446	0	0.0152057	0	0	0	0.000136633	0	2.6588e-05	0.00107991	0	0.00546448	1.29054e-05	0	0.000112549	0	0	0	0	0	0	0	0	0	0	0	0	0.0899624	0	0	0	0	0	0	0	9.76586e-05	0	0	0	0	0.000518941	0.000250871
Brochothrix_campestris	0	0	0	0	0	0.000246214	0.000298775	0	0	0	0	0	0	0	0	0	0	0	0	0	0	0	0	0	0	0	0	0	0	0	0	0	0	0	0	0	0	0	0	0	0	0	8.54513e-05	0	0	0	0	0	0
Brochothrix_thermosphacta	0	0	0	0	0.000178031	0	0.000896325	0	0	0.000383338	0	0	0	1.95191e-05	0	0	0	0	0	0	0.00104712	0	0	0	0	0	0	0	0	0	0	0	0	0	0	0	0	0	0	0	0	0	0.000244147	0	0	0	0	0	0.000111498
Budvicia_aquatica	0	0	0	0	0	0	0	0	0	0	0	0	0	0	0	0	0	0	0	0	0	0	0	0	0	0	0	0	0	0	0	0	0	0	0	0.00300752	0	0	0	0	0	0	0	0	0	0	0	0	0
Bulleidia_extructa	0	0	0	0	0.000267046	0	0	0	0	0	0	0	0	0	0	1.3294e-05	0	0	0	2.1509e-05	0	0	0	0	0	0	0	0	0.00118496	0	0.000219272	0	0	0.000140749	0	0	0	0	0	0.000342661	0	0	4.88293e-05	0	0	0	0	0	0
Burkholderia_ambifaria	0	0.000232518	0	0	0.000534093	0.003447	0.000746938	0	0	0.000383338	0	0	0	0	0	0	0	0	0	0	0	0	0	0	0	0	0	1.15154e-05	0	0.000705716	9.7454e-05	0.000124615	0	0	0	0.0105263	0	0	0	0	0	0	0	0	0	0	0	0	0.00179791
Burkholderia_anthina	0	0	0	0	0.000356062	0.00135418	0.000448163	0	0	0	0	0	0	0	0	0	0	0	0	0	0	0	0	0	0	0	0	0	0.000269309	0.000705716	2.43635e-05	0	0	0	0	0.00451128	0	0	0	0	0	0	0	0	0	0	0.000554324	0	0.000655052
Burkholderia_cenocepacia	0	0.000406906	0	0	0	0.0084944	0	0.00914077	0	0.000255558	0	0	0	0	0	1.3294e-05	0	0	0	0	0	0	0	0	0	0	0	0	0	0.00247001	0	0	0	0	0	0.0255639	0	0	0	0	0	0	0	0	0	0	0	0	0.00229965
Burkholderia_cepacia	0	0.000523165	0	0	0.000623108	0.00492429	0.00059755	0	0	0.00217225	0	0	1.68101e-05	1.95191e-05	0	1.3294e-05	0.00107991	0	0.00546448	1.29054e-05	0.00209424	0.000112549	0	0	0	0	0	1.15154e-05	0	0.00105857	0	0.000195824	0	0	0	0.0150376	0	0	0	0	0	0	0	0	0	0	0	0	0.00179791
Burkholderia_contaminans	0	0	0.00898204	0	0.000267046	0.0017235	0.00149388	0	0	0.000127779	0	0	0	3.90381e-05	0	0	0	0	0	0	0	0.000112549	0	0	0	0	0	0	0	0.00105857	3.65453e-05	0.000160219	0	0	0	0.00300752	0	0	0	0	0	0	0	0	0	0	0.00166297	0	0.000808362
Burkholderia_diffusa	0	0.000406906	0.00449102	0	0	0.00209282	0.000448163	0	0.00829876	0.000383338	0	0	0	0	0	0	0	0	0	0	0	0	0	0	0	0	0	0	0.000377033	0	0	0.000124615	0	0	0	0.00902256	0	0	0	0	0	0	0	0	0	0	0.000554324	0	0.000905923
Burkholderia_dolosa	0	0.000116259	0.00299401	0	0.000267046	0.00233904	0.00059755	0.00548446	0.00276625	0.000255558	0.000130225	0	0	0	0	0	0	0	0	0	0	0	0	0	0	0	0	0	0.000215448	0.00105857	6.09088e-05	5.34064e-05	0	4.8534e-06	0	0.00300752	0	0	0	0	0	0	0.000390635	0	0	0	0	0	0.000905923
Burkholderia_gladioli	0	0.000348776	0	0	0.00409471	0.00627847	0.00164326	0.00548446	0	0.000958344	0	0	0	7.80762e-05	0	0	0	0	0	3.01126e-05	0	0	0	0	0	0	0	0	0	0.00247001	0	0.000160219	0	0	0	0.00902256	0	0	0	0	0	0.0197628	0	0	0	0	0	0	0.00190941
Burkholderia_glumae	0	0.000116259	0	0	0	0.00233904	0.00059755	0.00548446	0	0.000255558	0	0	0	0	0	0	0	0	0	0	0	0	0	0	0	0	5.36265e-05	0	0	0.0119972	6.09088e-05	5.34064e-05	0	0	0	0.0075188	0	0	0	0	0	0	0.000488293	0	0	0	0	0	0.000961672
Burkholderia_lata	0	0.000116259	0	0	0	0.000246214	0.000298775	0	0	0	0	0	0	0	0	0	0	0	0	0	0	0	0	0	0	0	0	0	0.000107724	0.00141143	0	0	0	0	0.00322061	0	0	0	0	0	0	0	6.10366e-05	0	0	0	0	0	0.00015331
Burkholderia_latens	0	0	0	0	0.000267046	0.000861751	0.000746938	0	0	0	0	0	0	0	0	0	0	0	0	0	0	0	0	0	0	0	0	0	0	0	6.09088e-05	3.56043e-05	0	0	0.00826624	0.00451128	0	0	0	0	0	0	0	0	0	0	0	0	0.000362369
Burkholderia_mallei	0	0	0	0	0	0	0.000448163	0	0	0	0	0	0	0	0	0	0	0	0	0	0	0	0	0	0	0	0	0	0	0	0	0	0	0	0.000429415	0	0	0	0	0	0	0	0	0	0	0	0	0	0
Burkholderia_metallica	0	0	0	0	0.000178031	0.000615536	0.000448163	0	0	0.000127779	0	0	0	0	0	0	0	0	0	0	0	0	0	0	0	0	0	0	0	0	2.43635e-05	0	0.000647459	0	0.00332797	0.00451128	0	0	0	0	0	0	0.000146488	0	0	0	0	0	0.000250871
Burkholderia_multivorans	0	0.000523165	0	0	0	0.00947926	0.00298775	0.00914077	0	0.000958344	0	0	0	0	0	0	0	0	0	0	0	0	0	0	0	0	0	1.15154e-05	0	0.00247001	0	0.000302636	0	0	0	0.0195489	0	0	0	0	0	0	0	0	0	0	0	0	0.00309408
Burkholderia_oklahomensis	0.00118906	0.000116259	0	0	0	0.00357011	0.00179265	0	0	0.000511117	0	0	0	0	0	0	0	0	0	0	0	0	0	0	0	0	0	1.15154e-05	0	0.00105857	9.7454e-05	0	0	0	0	0.0135338	0	0	0	0	0	0	0	0	0	0	0	0	0.00100348
Burkholderia_pseudomallei	0	0.000348776	0	0	0.000267046	0.0051705	0.00164326	0	0	0.000383338	0.000130225	0	0	0	0	0	0	0	0	0	0	0	0	0	0	0	0	2.30309e-05	0	0.00282287	0	0	0	0	0	0.0105263	0	0	0	0	0	0	0	0	0	0	0.000554324	0	0.00125436
Burkholderia_pyrrocinia	0	0	0.00449102	0	0.000623108	0.00307768	0.000896325	0	0	0.000511117	0	0	0	0	0	0	0	0	0	0	0	0	0	0	0	0	0	1.15154e-05	0	0.00105857	0	0.000106813	0	0	0	0.0150376	0	0	0	0	0	0	0	0	0	0	0	0	0.000710801
Burkholderia_rhizoxinica	0	0	0	0	0	0	0	0	0	0	0	0	0	0	0	0	0	0	0	0	0	0	0	0	0.05	0	0	0	0	0	0	0	0	0	0	0	0	0	0	0	0	0	0	0	0	0	0	0	0
Burkholderia_stabilis	0	0	0	0	0	0.000492429	0.000448163	0	0	0.000255558	0	0	0	0	0	0	0	0	0	0	0	0	0	0	0	0	0	0	0	0.000705716	2.43635e-05	5.34064e-05	0	0	0.00429415	0.00300752	0	0	0	0	0	0	0	0	0	0	0	0	0.000557491
Burkholderia_thailandensis	0	0.000348776	0	0	0.000534093	0.00246214	0.000896325	0	0	0	0	0	0	0	0	0	0	0	0	0	0	0	0	0	0	0	0	0	0	0.00105857	0	0.000106813	0	0	0.0185722	0.0105263	0	0	0	0	0	0	0	0	0	0	0.000554324	0	0.00119861
Burkholderia_ubonensis	0	0	0	0	0	0	0	0	0	0.00313059	0	0	0	0	0	0	0	0	0	0	0	0	0	0	0	0	0	0	0	0	0	0	0	0	0	0	0	0	0	0	0	0	0	0	0	0	0	0	0.0224111
Burkholderia_vietnamiensis	0	0.000232518	0	0	0	0.00640158	0.00283836	0.00548446	0	0.000958344	0.000130225	0	0	5.85572e-05	0	0	0	0	0	0	0.00628272	0	0	0	0	0	0	2.30309e-05	0	0.00564573	0	0.000373845	0	0	0	0.0345865	0	0	0	0	0	0	0	0	0	0	0	0	0.0034007
Buttiauxella_agrestis	0	0	0	0	0	0	0	0	0	0	0	0	0	0	0	0	0	0	0	0	0	0	0	0	0	0	0	0	0	0	0	0	0	0	0	0	0	0	0	0	0	0	0	0	0	0	0	0	0
Buttiauxella_ferragutiae	0	0	0	0	0	0	0	0	0	0	0	0	0	0	0	0	0	0	0	0	0	0	0	0	0	0	0	0	0	0	0	0	0	0	0	0	0	0	0	0	0	0	0	0	0	0	0	0	5.57491e-05
Butyricicoccus_pullicaecorum	0	0	0	0	0	0	0	0	0	0.000894454	0	0	0	1.95191e-05	0	0	0	0	0	0	0	0	0	0	0	0	0	0	0	0	0	0	0	4.8534e-06	0	0	0	0	0	0	0	0	0	0	0	0	0	0	0
Butyricimonas_synergistica	0	0	0	0	0	0	0	0	0	0	0	0	0	0	0	0	0	0	0	0	0	0	0	0	0	0	5.36265e-05	0	0	0	0	0	0	0	0	0	0	0	0.000337553	0	0	0	0	0	0	0	0	0	0
Butyrivibrio_crossotus	0	0	0	0	0	0	0.000448163	0	0	0	0	0	0	0	0	0	0	0	0	0	0	0	0	0	0	0	0	0	0	0	0	0	0	0	0	0	0	0	0	0	0	0	0	0	0	0	0	0	0.000111498
Butyrivibrio_fibrisolvens	0	0	0	0	0	0	0	0	0	0	0	0	0	0	0	0	0	0	0	0	0	0	0	0	0	0	0	0	0	0	0	0	0	0	0	0	0	0	0	0	0	0	0	0	0	0	0	0	0
Byssochlamys_nivea	0	0	0	0	0	0	0	0	0	0	0	0	0	0	0	0	0	0	0	0	0	0	0	0	0	0	0	0	0	0	0	0	0	0	0	0	0	0	0	0	0	0	0	0	0	0	0	0	0
Byssochlamys_spectabilis	0	0	0	0	0	0	0	0	0	0.000255558	0	0	0	0	0	0	0	0	0	0	0	0	0	0	0	0	0	0	0	0	0	0	0	0	0	0	0	0	0	0	0	0	0	0	0	0	0	0	0.000209059
Caballeronia_concitans	0	0	0.00299401	0	0.000534093	0.00160039	0.000298775	0	0.00276625	0.000127779	0	0	0	0	0	0	0	0	0	0	0	0	0	0	0	0	0	0	0.000215448	0.00105857	0	3.56043e-05	0	0	0.00472356	0.00300752	0.00164474	0.00164813	0.00421941	0	0.000924214	0	0	0	0.0241935	0	0	0	0.000599303
Caballeronia_sordidicola	0	0	0	0	0	0.000492429	0.000448163	0	0	0.000511117	0	0	0	0	0	0	0	0	0	0	0	0	0	0	0	0	0	0	0.000215448	0.000705716	2.43635e-05	0	0	0	0.0027912	0.00300752	0	0	0.00101266	0	0	0	0.000146488	0	0	0	0	0	0.000404181
Caenibacillus_caldisaponilyticus	0	0	0	0	0	0	0	0	0	0	0	0	0	0	0	0	0	0	0	0	0	0	0	0	0	0	0	0	0	0	0	0	0	0	0	0	0	0	0	0	0	0	0	0	0	0	0	0	0
Caenispirillum_salinarum	0	0	0	0	0	0	0	0	0	0	0	0	0	0	0	0	0	0	0	0	0	0	0	0	0	0	0	0	0	0	0	0	0	0	0.000214707	0	0	0	0	0	0	0	0	0	0	0	0	0	5.57491e-05
Caldalkalibacillus_thermarum	0	0	0	0	0	0	0	0	0	0.00766675	0.000130225	0	0	1.95191e-05	0	0	0	0	0	0	0	0	0	0	0	0	0	0	0	0	0	0	0	0	0	0	0	0	0	0	0	0	0	0	0	0	0	0	0
Caldanaerobacter_subterraneus	0	0	0	0	0	0	0	0	0	0	0	0	0	0	0	0	0	0	0	0	0	0	0	0	0	0	0	0	0	0	0	0	0	0	0	0	0	0	0	0	0	0	0	0	0	0	0	0	0
Caldibacillus_debilis	0	0	0	0	0	0	0	0	0	0.000255558	0	0	0	0	0	0	0	0	0	0	0	0	0	0	0	0	0	0	0	0.000705716	0	0	0	0	0	0	0	0	0.000506329	0	0	0.0197628	0	0	0	0	0	0	0
Caldicellulosiruptor_owensensis	0	0	0	0	0	0	0	0	0	0	0	0	0	0	0	0	0	0	0	0	0	0	0	0	0	0	0	0	0	0	0	0	0	0	0	0	0	0	0	0	0	0	0	0	0	0	0	0	0
Caldimonas_manganoxidans	0	0	0	0	0	0	0	0	0	0.00517506	0	0	0	0	0	0	0	0	0	0	0.00104712	0	0	0	0	0	0	0	0	0	0	0	0	0	0	0	0	0	0.00219409	0	0	0	0	0	0	0	0	0	0.000111498
Caldisalinibacter_kiritimatiensis	0	0	0	0	0	0	0	0	0	0	0	0	0	0	0	0	0	0	0	0	0	0	0	0	0	0	0	0	0	0	0	0	0	4.8534e-06	0	0	0	0	0	0	0	0	0	0	0	0	0	0	0
Caloramator_australicus	0	0	0	0	0	0	0.000746938	0.00548446	0	0	0	0.0175439	0	0	0	0	0	0	0	0	0	0	0	0	0	0	0	0	0	0	0	0	0	0	0	0	0.00411184	0	0	0	0	0	2.44147e-05	0	0	0	0	0	0.00015331
Campylobacter_concisus	0	0.000116259	0	0	0.000267046	0	0	0	0	0	0.000260451	0	0	0.000566052	0	0.00293797	0.00107991	0	0	0.00260259	0	0	0	0	0	0.0100784	0.000643518	1.15154e-05	0	0	0.00348398	0	0	0.0443552	0.000644122	0	0	0	0.000506329	0.0287836	0	0	0.000219732	0.0192461	0	0.00762213	0	0	0
Campylobacter_curvus	0	0	0	0	0	0	0.000298775	0	0	0	0	0	0	0	0	2.6588e-05	0	0	0	0.000296824	0	0	0	0	0	0	0	0	0.000484757	0	0	0	0.000647459	4.8534e-06	0	0	0	0	0.000337553	0	0	0	0	0	0	0	0	0	0
Campylobacter_fetus	0	0	0	0	0	0	0	0	0	0	0	0	0	0	0	0	0	0	0	0	0	0	0	0	0	0	0	0	0	0	0	0	0	0	0	0	0	0	0	0	0	0	0	0	0	0	0	0	0
Campylobacter_gracilis	0	0.000116259	0	0	0.00178031	0	0	0	0	0.000127779	0.000260451	0	0	0	0	0.000877403	0	0	0.00546448	0.000357049	0	0	0	0	0	0	0	0	0	0	3.65453e-05	0	0	1.45602e-05	0	0	0	0	0	0.000685323	0	0	0	0	0	0.00012568	0	0	0
Campylobacter_hominis	0	0	0	0	0	0	0	0	0	0	0	0	0	0	0	0.000119646	0	0	0	0	0	0	0	0	0	0	0	0	0	0	0	0	0	0	0	0	0	0	0	0	0	0	0	0	0	0	0	0	0
Campylobacter_mucosalis	0	0	0	0	0	0	0	0	0	0	0	0	0	0	0	0	0	0	0	0	0	0	0	0	0.45	0	0	0	0	0	0	3.56043e-05	0	0	0	0	0	0	0	0	0	0	0	0	0	0	0	0	0
Campylobacter_rectus	0	0.000232518	0	0	0	0	0	0	0	0.000766675	0.000260451	0	0	0	0	0.000744463	0.00107991	0	0.010929	0.000546328	0	0	0	0.00132626	0	0	0.000750771	4.0304e-05	0	0.000705716	0	0.000658679	0	7.2801e-05	0	0	0	0	0	0.00137065	0	0	2.44147e-05	0	0	1.47859e-05	0	0	0
Campylobacter_showae	0	0	0	0	0.000178031	0	0	0	0	0.000127779	0	0	0	0	0	0.00285821	0.00107991	0	0	0.000210788	0	0	0	0	0	0	0	7.48503e-05	0.000538619	0	0	8.90107e-05	0	0.000150455	0	0	0	0	0	0.00308395	0	0	0	0	0	1.47859e-05	0	0	0
Campylobacter_sputorum	0	0	0	0	0	0	0	0	0	0	0	0	0	0	0	0	0	0	0	0	0	0	0	0	0	0	0	0	0	0	0	0	0	4.8534e-06	0	0	0	0	0	0	0	0	0	0	0	0	0	0	0
Campylobacter_ureolyticus	0	0	0	0	0	0	0	0	0	0.000383338	0	0	0	1.95191e-05	0	0	0	0	0	0	0	0	0	0	0	0	0	0	0	0.00105857	0	0	0	0	0	0	0	0	0.000506329	0	0	0	2.44147e-05	0	0	0	0	0	0
Candida_albicans	0.00713436	0	0	0	0	0.0017235	0.0180759	0	0	0	0.00664149	0	0.00744688	0	0	0	0	0.00683413	0	0.0279617	0	0	0	0	0	0.0145577	0	0	0	0	0.000353271	0.294643	0.0433797	0.00196563	0	0	0	0	0	0	0.469501	0.0197628	0	0	0	0	0	0.734821	0
Candida_dubliniensis	0	0	0	0	0	0	0	0	0	0	0	0	0	0	0	0	0	0	0	0	0	0	0	0	0	0	0	0	0	0	0	3.56043e-05	0	0	0	0	0	0	0	0	0	0	0	0	0	0	0	0	0
Candida_glabrata	0	0	0	0	0	0	0	0	0	0	0	0	1.68101e-05	0	0	0	0	0	0	8.60359e-06	0	0	0	0	0	0.0302352	0	0	0	0	2.43635e-05	0	0	0	0	0	0	0	0	0	0	0	0	0	0	0	0	0	0
Candida_haemulonis	0	0	0	0	0	0	0	0	0	0	0	0	0	0	0	0	0	0	0	0	0	0	0	0	0	0	0	0	0	0.000705716	0	0	0	0	0	0	0	0	0	0	0	0	0	0	0	0	0	0	0
Candida_inconspicua	0	0	0	0	0	0	0	0	0	0	0	0	0	0	0	0	0	0	0	0	0	0	0	0	0	0	0	0	0	0	0	0	0	0	0	0	0	0	0	0	0	0	0	0	0	0	0	0	0
Candida_metapsilosis	0	0	0	0	0.000178031	0	0.000298775	0	0	0	0	0	0	0	0	0	0	0	0	0	0	0	0	0	0	0	0	0	0.000107724	0	0	0	0	0	0	0.00300752	0	0	0	0	0	0	0.00102542	0.0254395	0	0	0.000554324	0.000518941	5.57491e-05
Candida_orthopsilosis	0	0	0	0	0	0	0	0	0	0	0	0	0	0	0	0	0	0	0	0	0	0	0	0	0	0	0	0	0	0	0	0	0	0	0	0	0	0	0	0	0	0	0	0	0	0	0	0	0
Candida_parapsilosis	0	0	0	0	0.000178031	0	0.000746938	0	0	0.00741119	0	0	0	9.75953e-05	0.0115659	0	0	0	0	0	0.00104712	0.000112549	0	0	0	0	0	0	0	0.00141143	0	0	0	0	0.000214707	0	0	0	0.000506329	0	0	0	0.000280769	0.063399	0	0	0.000554324	0.000778412	5.57491e-05
Candida_sake	0	0	0	0	0	0	0.000746938	0	0	0	0	0	0	0	0	0	0	0	0	0	0	0	0	0	0	0	0	0	0	0	0	0	0	0	0	0	0	0	0	0	0	0	0	0	0	0	0	0	0
Candida_tropicalis	0.00237812	0	0	0	0	0	0	0	0	0	0	0	0	0	0	0	0	0	0.00546448	0	0	0	0	0	0	0	0	0	0	0	0	0	0	1.21335e-05	0	0	0	0	0	0	0.0670055	0	0.0718401	0	0	0	0	0	0
Candida_wancherniae	0	0	0	0	0	0	0	0	0	0	0	0	0	0	0	0	0	0	0	0	0	0	0	0	0	0	0	0	0	0	0	0	0	0	0	0	0	0	0	0	0	0	0	0	0	0	0	0	0
Candidatus_Accumulibacter_phosphatis	0	0	0	0	0	0.000246214	0	0	0	0	0	0	0	0	0	0	0	0	0	0	0	0	0	0	0	0	0	0	0	0	0	0	0	0	0	0	0	0	0	0	0	0	2.44147e-05	0	0	0	0	0	0
Candidatus_Amoebophilus_asiaticus	0	0	0	0	0	0	0	0	0	0	0	0	0	0	0	0	0	0	0	0	0	0	0	0	0	0	0	0	0	0	0	0	0	0	0	0	0	0	0	0	0	0	0	0	0	0	0	0	0
Candidatus_Koribacter_versatilis	0	0	0	0	0	0	0	0	0	0	0	0	0	0	0	0	0	0	0	0	0	0	0	0	0	0	0	0	0	0	0	0	0	0	0.000214707	0	0	0	0	0	0	0	0	0	0	0	0	0	0
Candidatus_Nitrospira_defluvii	0	0	0	0	0	0.000246214	0	0	0	0	0	0	0	0	0	0	0	0	0	4.3018e-06	0.00104712	0	0	0	0	0	0	0	0.000107724	0	0	0	0	0	0	0	0	0	0	0	0	0	0	0	0	0	0	0	5.57491e-05
Candidatus_Solibacter_usitatus	0	0	0	0	0	0	0	0	0	0	0	0	0	0	0	0	0	0	0	0	0	0	0	0	0	0	0	0	0	0	0	0	0	0	0	0	0	0	0	0	0	0	0	0	0	0	0	0	0
Candidimonas_bauzanensis	0	0	0	0	0	0	0	0	0	0	0	0	0	0	0	0	0	0	0	0	0	0	0	0	0	0	0	0	0	0	0	0	0	0	0	0.00300752	0	0	0	0	0	0	0	0	0	0	0	0	0
Capnocytophaga_canimorsus	0	0	0	0	0	0	0	0	0	0	0	0	0	0	0	5.31759e-05	0	0	0	0	0	0	0	0	0	0	0	0	0	0	0	0	0	0	0	0	0	0	0	0	0	0	0	0	0	0	0	0	0
Capnocytophaga_cynodegmi	0	0	0	0	0	0	0	0	0	0	0	0	0	0	0	1.3294e-05	0	0	0	0	0	0	0	0	0	0	0	0	0	0	0	0	0	0	0	0	0	0	0	0	0	0	0	0	0	0	0	0	0
Capnocytophaga_gingivalis	0.00951249	0.000232518	0	0	0	0.000246214	0.000896325	0.00548446	0	0.000638896	0	0.0409357	0	0	0	0.00943873	0.0237581	0	0	8.60359e-06	0	0	0	0	0	0.00055991	0.000509452	4.0304e-05	0	0	0.000243635	0.000231428	0.00194238	0.00355269	0.000214707	0	0	0	0	0.0239863	0	0	0.000280769	0	0	0	0	0	0.00015331
Capnocytophaga_granulosa	0	0	0	0	0	0.000246214	0.000448163	0	0	0	0	0.0292398	0	1.95191e-05	0	0.00422749	0.00107991	0	0	9.03377e-05	0	0	0	0.00132626	0	0	0	0	0.0022622	0.00211715	0.000316726	0	0.000971188	6.06675e-05	0	0.00300752	0	0	0.000337553	0	0	0	0.000219732	0.000133191	0	4.43577e-05	0	0	0
Capnocytophaga_haemolytica	0	0	0	0	0	0	0	0	0	0	0	0	0	0	0	1.3294e-05	0	0	0	4.3018e-06	0	0	0	0	0	0	0	0	0	0	0	0	0	0	0	0	0	0	0	0	0	0	0	0	0	0	0	0	0
Capnocytophaga_ochracea	0	0	0	0	0	0	0.000298775	0	0.00276625	0	0.000390676	0.0175439	0	0	0	0.000797639	0.00215983	0	0	0.00114858	0.00104712	0	0	0.00486295	0	0	0.000509452	0	0.0052246	0.00105857	3.65453e-05	5.34064e-05	0	1.21335e-05	0	0	0.00164474	0	0	0.00262707	0	0	8.54513e-05	0	0	0	0	0	5.57491e-05
Capnocytophaga_sputigena	0.0332937	0	0	0	0	0	0	0.0310786	0	0.0018528	0	0	0	0	0	0.0115924	0.0215983	0	0.00546448	0.000129054	0	0	0	0.0181256	0	0	0.00128704	0.000115154	0	0	0	0	0.000647459	0.000111628	0	0	0	0	0	0	0	0	0	0.000732552	0	0.000887154	0	0	0
Capronia_epimyces	0	0	0	0	0	0	0	0	0	0	0	0	0	0	0	0	0	0	0	0	0	0	0	0	0	0	0	0	0	0	0	0	0	0	0	0	0	0	0	0	0	0	0	0	0	0	0	0	0
Cardiobacterium_hominis	0	0	0	0	0	0	0	0	0	0.000511117	0.0108087	0	0	0	0	0.000252586	0.00107991	0	0	0	0	0	0	0	0	0	0	0	0	0	0	0	0	0	0	0	0	0	0.00118143	0.000456882	0	0	0	0.000133191	0	0	0	0	0
Cardiobacterium_valvarum	0	0	0	0	0	0	0	0	0	0	0.000260451	0	0	0	0	3.98819e-05	0	0	0	8.60359e-06	0	0	0	0	0	0	0	0	0	0	0	0	0	4.8534e-06	0.000214707	0	0	0	0	0	0	0	0	0	0	0	0	0	5.57491e-05
Carnobacterium_alterfunditum	0	0	0	0	0	0	0	0	0	0.000255558	0	0	0	0	0	0	0	0	0	0	0	0	0	0	0	0	0	0	0	0	0	0	0	0	0	0	0	0	0	0	0	0	0	0	0	0	0	0	0
Carnobacterium_divergens	0	0	0	0	0.00142425	0.000492429	0.000448163	0	0	0	0	0	0	0	0	0	0	0	0	0	0	0	0	0	0	0	0	0	0	0	0	0	0	0	0	0	0	0	0	0	0	0	0.000292976	0	0	0	0	0	0
Carnobacterium_funditum	0	0	0	0	0	0	0	0	0	0	0	0	0	0	0	0	0	0	0	0	0	0	0	0	0	0	0	0	0	0	0	0	0	0	0	0	0	0	0	0	0	0	0	0	0	0	0	0	0
Carnobacterium_gallinarum	0	0	0	0	0	0	0	0	0	0	0	0	0	0	0	0	0	0	0	0	0	0	0	0	0	0	0	0	0	0	0	0	0	0	0	0	0	0	0	0	0	0	2.44147e-05	0	0	0	0	0	0
Carnobacterium_iners	0	0	0	0	0	0	0	0	0	0	0	0	0	0	0	0	0	0	0	0	0	0	0	0	0	0	0	0	0	0	0	0	0	0	0	0	0	0	0	0	0	0	0	0	0	0	0	0	0
Carnobacterium_inhibens	0	0	0	0	0	0	0	0	0	0	0	0	0	0	0	0	0	0	0	0	0	0.000112549	0	0	0	0	0	0	0	0	0	0	0	0	0	0	0	0	0	0	0	0	2.44147e-05	0	0	0	0	0	0
Carnobacterium_jeotgali	0	0	0	0	0	0	0	0	0	0	0	0	0	0	0	0	0	0	0	0	0	0	0	0	0	0	0	0	0	0.00141143	0	0	0	0	0	0	0	0	0	0	0	0	0	0	0	0	0	0	0
Carnobacterium_maltaromaticum	0	0	0	0	0.000534093	0.000615536	0.00059755	0	0	0.000766675	0	0	0	0	0	0	0	0	0	0	0	0	0	0	0	0	0	0	0	0	0	0	0	0	0	0	0	0	0	0	0	0	0.000634781	0	0	0	0	0	5.57491e-05
Carnobacterium_mobile	0	0	0	0	0	0	0	0	0	0	0	0	0	0	0	0	0	0	0	0	0	0	0	0	0	0	0	0	0	0	0	0	0	0	0	0	0	0	0	0	0	0	4.88293e-05	0	0	0	0	0	0
Carnobacterium_viridans	0	0	0	0	0	0.000246214	0	0	0	0	0	0	0	0	0	0	0	0	0	0	0	0	0	0	0	0	0	0	0	0	0	0	0	0	0	0	0	0	0	0	0	0	0	0	0	0	0	0	0
Castellaniella_caeni	0	0	0	0	0	0.000246214	0	0	0	0.000255558	0	0	0	0	0	0	0	0	0	0	0.00314136	0	0	0	0	0	0	0	0	0	0	0	0	0	0	0	0	0	0.000337553	0	0	0	0	0	0	0	0	0	0
Catabacter_hongkongensis	0	0	0	0	0	0	0	0	0	0	0	0	0	0	0	0	0	0	0.00546448	0	0	0	0	0	0	0	0	0	0	0	0	0	0	4.8534e-06	0	0	0	0	0	0	0	0	0	0	0	0	0	0	0
Catenibacterium_mitsuokai	0	0	0	0	0	0.000246214	0	0	0	0	0	0	0	0	0	0	0	0	0	0	0	0	0	0	0	0	0	0	0	0	0	0	0	7.2801e-06	0	0	0	0	0	0	0	0	2.44147e-05	0	0	0	0	0	0.000111498
Catonella_morbi	0	0	0	0	0	0	0	0	0	0.000255558	0.000781352	0	0	0	0	0.00136928	0	0	0	0.00043018	0	0	0	0	0	0	0.000187693	0	0	0.00105857	0.000438543	0	0	1.21335e-05	0	0	0	0	0	0	0	0	0	0	0	0	0	0	5.57491e-05
Caulobacter_segnis	0	0	0	0	0	0.000861751	0.000298775	0	0	0.000638896	0	0	0	1.95191e-05	0	0	0	0	0	0	0	0	0	0	0	0	0	0	0.000107724	0.00282287	2.43635e-05	0	0	0	0.00236178	0.00300752	0	0	0	0	0	0	0	0	0.016129	0	0	0.000518941	0.000111498
Caviibacter_abscessus	0	0	0	0	0	0	0	0	0	0	0	0	0	0	0	0	0	0	0	0	0	0	0	0	0	0	0	0	0	0	0	0	0	4.8534e-06	0	0	0	0	0	0	0	0	0	0	0	0	0	0	0
Cedecea_davisae	0	0	0	0	0	0	0	0	0	0	0	0	0	0	0	0	0	0	0	0	0	0	0	0	0	0	0	0	0	0	0	0	0	0	0	0	0	0	0	0	0	0	0	0	0	0	0	0	0
Cedecea_lapagei	0	0	0	0	0	0	0	0	0	0	0	0	0	0	0	0	0	0	0	0	0	0	0	0	0	0	0	0	0	0	0	0	0	0	0	0	0	0	0	0	0	0	0	0	0	0	0	0	0
Cedecea_neteri	0	0	0	0	0	0	0.000298775	0	0	0	0	0	0	0	0	0	0	0	0	0	0	0	0	0	0	0	0	0	0	0	0	0	0	0	0	0	0	0	0	0	0	0	0	0	0	0	0	0	0
Cellulomonas_fimi	0	0	0	0	0	0	0	0	0	0	0	0	0	0	0	0	0	0	0	0	0	0	0	0	0	0	0	0	0	0	0	0	0	0	0	0	0	0	0	0	0	0	0	0	0	0	0	0	0
Cellulomonas_flavigena	0	0	0	0	0	0	0	0	0	0	0	0	0	0	0	1.3294e-05	0	0	0	0	0	0	0	0	0	0	0	0	0	0	0	0	0	0	0.000214707	0	0	0	0	0	0	0	2.44147e-05	0	0	0	0	0	0
Cellulomonas_gilvus	0	0	0	0	0	0	0	0	0	0	0	0	0	0	0	0	0	0	0	0	0	0	0	0	0	0	0	0	0	0	0	0	0	0	0	0	0	0	0	0	0	0	0	0	0	0	0	0	5.57491e-05
Cellulomonas_massiliensis	0	0	0	0	0	0	0	0	0	0	0	0	0	0	0	0	0	0	0	0	0	0	0	0	0	0	0	0	0	0	0	0	0	0	0	0	0	0	0	0	0	0	0	0	0	0	0	0	0
Cellulosilyticum_lentocellum	0	0	0	0	0	0	0	0	0	0	0	0	0	0	0	0	0	0	0	0	0	0	0	0	0	0	0	0	0	0	0	0	0	0	0	0	0	0	0.000337553	0	0	0	0	0	0	0	0	0	0
Cellulosimicrobium_cellulans	0	0	0	0	0	0	0	0	0	0	0	0	0	0	0	0	0	0	0	0	0	0	0	0	0	0	0	0	0	0	0	0	0	0	0	0	0	0	0	0	0	0	2.44147e-05	0	0	0	0	0	0
Cellvibrio_japonicus	0	0.000116259	0	0	0	0	0	0	0	0.000127779	0	0	0	0	0	0	0	0	0	0	0	0	0	0	0	0	0	0	0	0	0	3.56043e-05	0	0	0.00161031	0	0	0	0	0	0	0	0	0	0	0	0	0	0
Centipeda_periodontii	0	0	0	0	0	0	0	0	0	0	0	0	0	0	0	0.000425407	0	0	0	0.000679684	0	0	0	0	0	0	0	0	0.000377033	0	0	0	0.000647459	1.21335e-05	0	0	0	0	0.000337553	0.000685323	0	0	0	0	0	4.43577e-05	0	0	0
Cephaloticoccus_capnophilus	0	0	0	0	0	0	0	0	0	0	0	0	0	0	0	0	0	0	0	0	0	0	0	0	0	0	0	0	0	0	0	0	0	0	0	0	0	0	0	0	0	0	0	0	0	0	0	0	0
Cercospora_cf._flagellaris	0	0	0	0	0	0	0	0	0	0.000127779	0	0	0	0	0	0	0	0	0	0	0	0	0	0	0	0	0	0	0	0.00141143	0	0	0	0	0	0	0	0	0	0	0	0	0	0	0	0	0	0	0
Cercospora_zeina	0	0	0	0	0	0	0	0	0	0	0	0	0	0	0	0	0	0	0	0	0	0	0	0	0	0	0	0	0	0	0	3.56043e-05	0	0	0	0	0	0	0	0	0	0	0	0	0	0	0	0	0
Chaetomium_globosum	0	0	0	0	0	0.000246214	0	0	0	0	0	0	0	0	0	0	0	0	0	0	0	0	0.043956	0	0	0.00055991	0	0	0	0	0	0	0	0	0	0	0	0	0	0	0	0	0	0	0	0	0	0	5.57491e-05
Chelatococcus_sambhunathii	0	0	0	0	0.000534093	0	0	0	0	0.000127779	0	0	0	0	0	0	0	0	0	0	0	0	0	0	0	0	0	0	0.00102338	0	2.43635e-05	0	0	0	0.0013956	0	0	0	0.00118143	0	0.00138632	0	2.44147e-05	0	0	0	0	0	0
Chitinilyticum_aquatile	0	0	0	0	0	0	0	0	0	0	0	0	0	0	0	0	0	0	0	0	0	0	0	0	0	0	0	0	0	0	0	0	0	4.8534e-06	0	0	0	0	0.000337553	0	0	0	0	0	0	0	0	0	0
Chitinimonas_koreensis	0	0	0	0	0	0	0	0	0	0	0	0	0	0	0	0	0	0	0	0	0	0	0	0	0	0	0	0	0	0	0	0	0	0	0	0	0	0	0	0	0	0	0	0.000133191	0	0	0	0	0
Chitiniphilus_shinanonensis	0	0	0	0	0	0	0	0	0	0	0	0	0	0	0	0	0	0	0	0	0	0	0	0	0	0	0	0	0	0	0	0	0	0	0	0	0	0	0	0	0	0	0	0	0	0	0	0	0
Chitinophaga_pinensis	0	0	0	0	0	0	0	0	0	0	0	0	0	0	0	0	0	0	0	0	0	0	0	0	0	0	0	0	0	0.000705716	0	0	0	0	0	0	0	0	0	0	0	0	0	0	0	0	0	0	0
Chlamydia_abortus	0	0	0	0	0	0	0.000746938	0	0	0	0	0	0	0	0	0	0	0	0	0	0	0	0	0	0	0	0	0	0	0	0	0	0	0	0	0	0	0	0	0	0.00231054	0	0	0	0	0	0	0	0
Chlamydia_psittaci	0	0	0	0	0	0	0.291306	0	0	0	0	0	0	0	0	0	0	0	0	0	0	0	0	0	0	0	0	0	0	0	0	0	0	0	0	0	0	0	0	0	0.384011	0	0	0	0	0	0	0	0
Chlorobium_luteolum	0	0	0	0	0	0	0	0	0	0	0	0	0	0	0	0	0	0	0	0	0	0	0	0	0	0	0	0	0	0	0	0	0	0	0	0	0	0	0	0	0	0	0	0	0	0	0	0	0
Chlorogloeopsis_fritschii	0	0	0	0	0	0	0	0	0	0	0	0	0	0	0	0	0	0	0	0	0	0	0	0	0	0	0	0	0	0.00105857	0	0	0	0	0	0	0	0	0	0	0	0	0	0	0	0	0	0	0
Chondromyces_apiculatus	0	0	0	0	0	0	0	0	0	0	0	0	0	0	0	0	0	0	0	0	0	0	0	0	0	0	0	0	0	0	0	0	0	0	0	0	0	0	0	0	0	0	0	0	0	0	0	0	0
Chromera_velia	0	0	0	0	0	0	0	0	0	0	0	0	0	0	0	0	0	0	0	0	0	0	0	0	0	0	0	0	0	0	0	0	0	0	0	0	0	0	0.000337553	0	0	0	0	0	0	0	0	0	0
Chromobacterium_haemolyticum	0	0	0	0	0	0	0	0	0	0	0	0	0	0	0	0	0	0	0	0	0	0	0	0	0	0	0	0	0	0	0	0	0	0	0	0	0	0	0.000675105	0	0	0	0	0	0	0	0	0	0
Chromobacterium_violaceum	0	0	0	0	0	0	0	0	0	0.000127779	0	0	0	0	0	0	0	0	0	0	0	0	0	0	0	0	0	0	0	0.000705716	0	0	0	0	0.000214707	0	0	0	0	0	0	0	2.44147e-05	0	0	0	0	0	5.57491e-05
Chromohalobacter_salexigens	0	0	0	0	0	0	0	0	0	0	0	0	0	0	0	0	0	0	0	0	0	0	0	0	0	0	0	0	0	0	0	0	0	0	0	0	0	0	0	0	0	0	0	0	0	0	0	0	0
Chroococcidiopsis_thermalis	0	0	0	0.0168067	0	0	0	0	0	0	0	0	0	1.95191e-05	0	0	0	0	0	0	0	0	0	0	0	0	0	0	0	0.00882145	0	0	0	0	0	0	0	0	0.000506329	0	0	0	6.10366e-05	0	0	1.47859e-05	0	0	0.000111498
Chryseobacterium_gleum	0	0	0	0	0	0.00381632	0.0023902	0	0	0.00313059	0	0	0	1.95191e-05	0	0	0	0	0	0	0.00209424	0	0	0	0	0	0	0	0	0	0	0	0	4.8534e-06	0	0.00902256	0	0	0	0	0	0	0	0	0	0	0	0	0.000905923
Chryseobacterium_hominis	0	0	0	0	0.000178031	0.00196972	0.000298775	0.00548446	0	0.00313059	0	0	0	0	4.2996e-05	0	0	0	0	0	0.0146597	0.000112549	0	0	0	0	0	0	0	0.0067043	9.7454e-05	0	0	0	0.00236178	0.00300752	0	0	0	0	0.00138632	0	0.000122073	0	0	1.47859e-05	0	0	0.00045993
Chryseobacterium_indologenes	0	0.000116259	0	0	0.000356062	0.000615536	0.000448163	0	0	0.000766675	0	0	0	0	0	0	0	0	0	1.29054e-05	0.00209424	0.000112549	0	0	0	0	0	0	0	0.00105857	0.000548179	0	0	0	0.0041868	0.00300752	0	0.000824063	0.00118143	0	0	0.0118577	4.88293e-05	0	0	0	0	0	0.000111498
Chryseobacterium_koreense	0	0	0	0	0	0.000246214	0	0	0	0	0	0	0	1.95191e-05	0	0	0	0	0	0	0	0	0	0	0	0	0	0	0	0	0	0	0	0	0.000429415	0	0	0	0	0	0	0	0	0	0	0	0	0	0
Chryseobacterium_molle	0	0	0	0	0	0	0	0	0	0.000127779	0	0	0	0	0	0	0	0	0	0	0.00104712	0	0	0	0	0	0	0	0	0	0	0	0	0	0.000214707	0	0	0	0.000337553	0	0	0	0	0	0	0	0	0	0
Chryseobacterium_oranimense	0	0	0.00299401	0	0	0.000246214	0	0	0	0	0	0	0	0	0	1.3294e-05	0	0	0	0	0	0.000112549	0	0	0	0	0	0	0	0.000705716	0	0	0	4.8534e-06	0.00182501	0	0	0	0.000337553	0	0	0	0	0	0	0	0	0	0
Chrysosporium_queenslandicum	0	0.000116259	0	0	0	0	0	0	0	0.000638896	0	0	0	0	0	0	0	0	0	0	0	0	0	0	0	0	0	0	0	0.00211715	2.43635e-05	0	0	0	0.000429415	0	0	0	0.000337553	0	0	0	2.44147e-05	0	0	0	0	0	5.57491e-05
Chthoniobacter_flavus	0	0	0	0	0	0	0	0	0	0	0	0	0	0	0	0	0	0	0	0	0	0	0	0	0	0	0	0	0	0	0	0	0	0	0	0	0	0	0	0	0	0	0	0	0	0	0	0	0
Chthonomonas_calidirosea	0	0	0	0	0	0	0	0	0	0.000127779	0	0	0	0	0	0	0	0	0	0	0	0	0	0	0	0	0	0	0	0	0	0	0	0	0	0	0	0	0	0	0	0	0	0	0	0	0	0	0
Citreicella_marina	0	0	0	0	0	0	0	0	0	0.000127779	0	0	0	0	0	0	0	0	0	0	0	0	0	0	0	0	0	0	0	0	0	0	0	0	0	0	0	0	0.000337553	0	0	0	0	0	0	0	0	0	0
Citreimonas_salinaria	0	0	0.00299401	0	0	0	0	0	0	0	0	0	0	0	0	0	0	0	0	0	0	0	0	0	0	0	0	0	0	0	0	0	0	0	0	0	0	0	0	0	0	0	0	0	0	0	0	0	0
Citrobacter_amalonaticus	0	0	0	0	0	0.000246214	0	0.00548446	0	0.000255558	0	0	0	0	0	0	0.00215983	0	0	0	0	0	0	0	0	0	0	0	0	0	0	0	0	0	0	0	0	0	0	0	0	0	0	0	0	0	0.000554324	0	0
Citrobacter_braakii	0	0	0	0	0	0.000246214	0	0.00548446	0.00276625	0.0012139	0.000260451	0	0	3.90381e-05	0.00150486	0	0	0	0	0	0.052356	0	0	0	0	0	0	0	0	0	0	0	0	0	0	0	0	0	0.000337553	0	0	0	0	0.000199787	0	0	0.000554324	0	0
Citrobacter_farmeri	0	0	0	0	0	0	0	0	0	0	0	0	0	0	0	0	0	0	0	0	0	0	0	0	0	0	0	0	0	0	0	0	0	0	0	0	0	0	0	0	0	0	0	0	0	0	0	0	0
Citrobacter_freundii	0	0	0	0	0	0	0	0	0	0	0	0	0	0	8.59919e-05	0	0.00107991	0	0	6.4527e-05	0.0408377	0.000225098	0	0	0	0	0	0	0	0	0	0	0	0	0.000644122	0	0	0	0.00101266	0	0	0	2.44147e-05	0	0.0645161	1.47859e-05	0	0.000518941	0.000250871
Citrobacter_koseri	0	0	0	0	0	0	0	0	0	0	0	0	0	0	0	0	0	0	0	0	0.0115183	0	0	0	0	0	0	0	0	0	0	0	0	0	0	0	0	0	0	0	0	0	0	0	0	0	0	0	0
Citrobacter_rodentium	0	0	0	0	0	0	0	0	0	0	0	0	0	0	0	0	0	0	0	0	0.00104712	0	0	0	0	0	0	0	0	0	0	0	0	0	0	0	0	0	0.000337553	0	0	0	0	0	0	0	0	0	0
Citrobacter_sedlakii	0	0	0	0	0	0	0	0	0	0.00172502	0	0	0	5.85572e-05	0	0	0.00107991	0	0	4.3018e-06	0	0	0	0	0	0	0	0	0	0	0	0	0	0	0	0	0	0	0	0	0	0	0	0	0	0	0	0	0
Citrobacter_werkmanii	0	0	0	0	0	0	0	0	0	0	0	0	0	0	0	0	0	0	0	4.3018e-06	0	0	0	0	0	0	0	0	0	0	0	0	0	0	0	0	0	0	0	0	0	0	0	0	0	0	0	0	0
Citrobacter_youngae	0	0	0	0	0	0	0	0	0	0	0	0	0	0	0	0	0	0	0	0	0	0	0	0	0	0	0	0	0	0	0	0	0	0	0	0	0	0	0	0	0	0	2.44147e-05	0	0	0	0	0	0
Citromicrobium_bathyomarinum	0	0	0	0	0	0	0	0	0	0	0	0	0	0	0	0	0	0	0	0	0	0	0	0	0	0	0	0	0	0	0	0	0	0	0	0	0	0	0.000337553	0	0	0	0	0	0	0	0	0	0
Cladophialophora_carrionii	0	0	0	0	0	0	0	0	0	0	0	0	0	0	0	0	0	0	0	0	0	0	0	0	0	0	0	0	0	0	0	0	0	0	0	0	0	0	0	0	0	0	0	0	0	0	0	0	0
Cladophialophora_psammophila	0	0	0	0	0	0	0	0	0	0	0	0	0	0	0	0	0	0	0	0	0	0	0	0	0	0	0	0	0	0	0	0	0	0	0	0	0	0	0	0	0	0	0	0	0	0	0	0	0
Cladophialophora_yegresii	0	0	0	0	0	0	0	0	0	0	0	0	0	0	0	0	0	0	0	0	0	0	0	0	0	0	0	0	0	0	0	0	0	0	0	0	0	0	0	0	0	0	0	0	0	0	0	0	0
Cladosporium_cladosporioides	0	0	0	0	0	0	0	0	0	0	0	0	0	1.95191e-05	0	0	0	0	0	0	0	0	0	0	0	0	0	0	0	0.000705716	0	0	0	0	0.000214707	0	0	0	0	0	0	0	0	0	0	0	0	0	0
Cladosporium_phlei	0	0	0	0	0	0	0	0	0	0	0	0	0	0	0	0	0	0	0	0	0	0	0	0	0	0	0	0	0	0.000705716	0	0	0	0	0	0	0	0	0	0	0	0	0	0	0	0	0	0	0
Cladosporium_sphaerospermum	0	0	0.00299401	0	0.000178031	0	0	0	0	0.0255558	0	0	1.68101e-05	0.000195191	0	2.6588e-05	0	0	0	8.60359e-06	0	0	0	0	0	0	5.36265e-05	0	0	0.0578687	3.65453e-05	3.56043e-05	0	0	0.00203972	0	0	0	0.00118143	0	0	0	8.54513e-05	0	0	0	0	0	0.000209059
Clavibacter_michiganensis	0	0	0	0	0	0	0	0	0	0.000127779	0	0	0	0	0	0	0	0	0	0	0	0	0	0	0	0	0	0	0.000107724	0	0	0	0	0	0	0	0	0	0	0	0	0	0	0	0	0	0	0	0
Clavispora_lusitaniae	0	0	0	0	0	0	0	0	0	0	0	0	0	0	0	0	0	0	0	0	0	0.000112549	0	0	0	0	0	0	0	0	0	0	0	0	0	0	0	0	0	0	0	0	0	0	0	0	0	0	0
Cloacibacillus_evryensis	0	0	0	0	0	0	0	0	0	0	0	0	0	0	0	0	0	0	0	0	0	0	0	0	0	0	0	0	0	0	0	0	0	0	0	0	0	0	0	0	0	0	0	0	0	0	0	0	0
Cloacibacterium_normanense	0	0	0	0	0	0.0017235	0.00463101	0	0.00276625	0.00709175	0.000130225	0	0	0	0	2.6588e-05	0.00107991	0	0	0	0	0	0	0	0	0	0	0	0	0.00211715	0.000109636	3.56043e-05	0	0	0.00085883	0.00300752	0	0	0	0	0	0.0118577	0	0	0	0	0	0	0.000209059
Clostridiales_bacterium_KA00134	0	0	0	0	0	0	0	0	0	0	0	0	0	0	0	0	0	0	0	0	0	0	0	0	0	0	0	0	0	0	0	0	0	0	0	0	0	0	0	0	0	0	0	0	0	0	0	0	0
Clostridiales_bacterium_KA00274	0	0	0	0	0	0	0	0	0	0	0	0	0	0	0	1.3294e-05	0	0	0	0	0	0	0	0	0	0	0	0	0	0	0	0	0	0	0	0	0	0	0	0	0	0	0	0	0	0	0	0	0
Clostridiales_bacterium_KLE1615	0	0	0	0	0	0	0	0	0	0	0	0	0	0	0	0	0	0	0	0	0	0	0	0	0	0	0	0	0	0	0	0	0	0	0	0	0	0	0	0	0	0	0	0	0	0	0	0	0
Clostridiales_bacterium_VE202-03	0	0	0	0	0	0	0	0	0	0	0	0	0	0	0	0	0	0	0	0	0	0	0	0	0	0	0	0	0	0	0	0	0	0	0	0	0	0	0	0	0	0	0	0	0	0	0	0	0
Clostridiales_bacterium_VE202-07	0	0	0	0	0	0	0	0	0	0	0	0	0	0	0	0	0	0	0	0	0	0	0	0	0	0	0	0	0	0	0	0	0	0	0	0	0	0	0	0	0	0	0	0	0	0	0	0	5.57491e-05
Clostridiales_bacterium_VE202-21	0	0	0	0	0	0	0	0	0	0	0	0	0	0	0	0	0	0	0	0	0	0	0	0	0	0	0	0	0	0	0	0	0	0	0	0	0	0	0	0	0	0	0	0	0	0	0	0	0
Clostridiales_bacterium_VE202-26	0	0	0	0	0	0	0	0	0	0.000127779	0	0	0	0	0	0	0	0	0	0	0	0	0	0	0	0	0	0	0	0	0	0	0	0	0	0	0	0	0.000337553	0	0	0	0	0	0	0	0	0	0
Clostridiales_bacterium_VE202-27	0	0	0	0	0	0	0	0	0	0	0	0	0	0	0	0	0	0	0	4.3018e-06	0	0	0	0	0	0	0	0	0	0	0	0	0	0	0	0	0	0	0	0	0	0	0	0	0	0	0	0	5.57491e-05
Clostridiales_bacterium_VE202-28	0	0	0	0	0	0	0.000298775	0	0	0	0	0	0	0	0	0	0	0	0	0	0	0	0	0	0	0	0	0	0	0	0	0	0	0	0	0	0	0	0	0	0	0	0	0	0	0	0	0	0
Clostridiales_bacterium_oral_taxon_876	0	0	0	0	0	0	0	0	0	0	0	0	0	0	0	0	0	0	0	3.01126e-05	0	0.000112549	0	0	0	0	0	0	0	0	0	0	0	0	0	0	0	0	0	0	0	0	0	0	0	0	0	0	0
Clostridiisalibacter_paucivorans	0	0	0	0	0	0	0	0	0	0	0	0	0	0	0	0	0	0	0	0	0	0	0	0	0	0	0	0	0	0	0	0	0	0	0	0	0	0	0	0	0	0	0	0	0	0	0	0	0
Clostridioides_difficile	0	0	0	0	0	0	0.000298775	0	0	0	0	0	0	0	0	0	0	0	0	0	0	0	0	0	0	0	0	0	0	0	0	0	0	0	0	0	0	0	0	0	0	0	0	0	0	0	0	0	0
Clostridium_algidicarnis	0	0	0	0	0	0	0	0	0	0	0	0	0	0	0	0	0	0	0	0	0	0	0	0	0	0	0	0	0	0	0	0	0	0	0	0	0	0	0	0	0	0	0	0	0	0	0	0	0
Clostridium_argentinense	0	0	0	0	0	0	0	0	0	0	0	0	0	0	0	0	0	0	0	0	0	0	0	0	0	0	0	0	0	0	0	0	0	0	0	0	0	0	0	0	0	0	0	0	0	0	0	0	0
Clostridium_baratii	0	0	0	0	0	0	0	0	0	0	0	0	0	0	0	0	0	0	0	0	0	0	0	0	0	0	0	0	0	0	0	0	0	0	0	0	0	0	0	0	0	0	6.10366e-05	0	0	0	0	0	0
Clostridium_beijerinckii	0	0	0	0	0	0	0	0	0	0	0	0	0	0	0	0	0	0	0	0	0	0	0	0	0	0	0	0	0	0	0	0	0	0	0	0	0	0	0	0	0	0	0	0	0	0	0	0	0
Clostridium_butyricum	0	0	0	0	0	0.000246214	0.00059755	0	0	0	0	0	0	0	0	0	0	0	0	0	0	0	0	0	0	0	0	0	0	0.000705716	0	0	0	0	0	0	0	0	0.000337553	0	0	0	6.10366e-05	0	0	0	0	0	0.000111498
Clostridium_cadaveris	0	0	0	0	0	0	0	0	0	0	0	0	0	0	0	0	0	0	0	0	0	0	0	0	0	0	0	0	0	0	0	0	0	0	0	0	0	0	0	0	0	0	0	0	0	0	0	0	0
Clostridium_celatum	0	0	0	0	0	0.000492429	0	0	0	0	0	0	0	0	0	0	0	0	0	0	0	0	0	0	0	0	0	0	0	0	0	0	0	0	0	0	0	0	0	0	0	0	6.10366e-05	0	0	0	0	0	0
Clostridium_cellulovorans	0	0	0	0	0	0	0.000298775	0	0	0	0	0	0	0	0	0	0	0	0	0	0	0	0	0	0	0	0	0	0	0	0	0	0	0	0	0	0	0	0	0	0	0	0	0	0	0	0	0	0
Clostridium_chauvoei	0	0	0	0	0	0	0	0	0	0	0	0	0	0	0	0	0	0	0	0	0	0	0	0	0	0	0	0	0	0	0	0	0	0	0	0	0	0	0	0	0	0	0	0	0	0	0	0	0
Clostridium_clostridioforme	0	0	0	0	0	0	0	0	0	0	0	0	0	0	0	1.3294e-05	0	0	0	0	0	0	0	0	0	0	0	0	0	0	0	0	0	0	0	0	0	0	0	0.00011422	0	0	0	0	0	0	0	0	0
Clostridium_disporicum	0	0	0	0	0	0.000246214	0.000448163	0	0	0	0	0	0	0	0	0	0	0	0	0	0	0	0	0	0	0	0	0	0	0	0	0	0	0	0	0	0	0	0	0	0	0	0	0	0	0	0	0	0
Clostridium_innocuum	0	0	0	0	0	0	0	0	0	0	0	0	0	0	0	0	0	0	0	0	0	0	0	0	0	0	0	0	0	0	0	0	0	0	0	0	0	0	0	0	0	0	0	0	0	0	0	0	0
Clostridium_intestinale	0	0	0	0	0	0	0	0	0	0	0	0	0	1.95191e-05	0	0	0	0	0	0	0	0	0	0	0	0	0	0	0	0	0	0	0	0	0	0	0	0	0	0	0	0	0	0	0	0	0	0	0
Clostridium_kluyveri	0	0	0	0	0	0	0	0	0	0	0	0	0	0	0	0	0	0	0	0	0	0	0	0	0	0	0	0	0	0	0	0	0	0	0	0	0	0	0	0	0	0	0	0.000133191	0	0	0	0	0
Clostridium_leptum	0	0	0	0	0	0	0	0	0	0.000127779	0	0	0	0	0	0	0	0	0	0	0	0	0	0	0	0	0	0	0	0	0	0	0	0	0	0	0	0	0	0	0	0	0	0	0	0	0	0	0
Clostridium_neonatale	0	0	0	0	0	0	0	0	0	0	0	0	0	0	0	0	0	0	0	0	0	0	0	0	0	0	0	0	0	0	0	0	0	4.8534e-06	0	0	0	0	0	0	0	0	0	0	0	0	0	0	0
Clostridium_paraputrificum	0	0	0	0	0	0	0	0	0	0	0	0	0	0	0	0	0	0	0	0	0	0	0	0	0	0	0	0	0	0	0	0	0	0	0	0	0	0	0	0	0	0	0	0	0	0	0	0	0
Clostridium_perfringens	0	0	0	0	0.000178031	0.000246214	0	0	0	0	0	0	0	0	0	0	0	0	0	8.60359e-06	0	0	0	0	0	0	0	0	0	0	0	0	0	0	0	0	0	0	0	0	0	0	0	0.000133191	0	0	0	0	0
Clostridium_phytofermentans	0	0	0	0	0	0	0	0	0	0	0	0	0	0	0	0	0	0	0	0	0	0	0	0	0	0	0	0	0	0	2.43635e-05	0	0	0	0	0	0	0	0.000337553	0	0	0	0	0	0	0	0	0	0
Clostridium_puniceum	0	0	0	0	0	0	0	0	0	0	0	0	0	0	0	0	0	0	0	0	0	0	0	0	0	0	0	0	0	0	0	0	0	0	0	0	0	0	0	0	0	0	0	0	0	0	0	0	0
Clostridium_saccharobutylicum	0	0	0	0	0	0	0	0	0	0	0	0	0	0	0	0	0	0	0	0	0	0	0	0	0	0	0	0	0	0	0	0	0	0	0	0	0	0	0	0	0	0	0	0	0	0	0	0	0
Clostridium_saccharolyticum	0	0	0	0	0	0	0	0	0	0	0	0	0	0	0	0	0	0	0	0	0	0	0	0	0	0	0	0	0	0	0	0	0	0	0	0	0	0	0	0	0	0	0	0	0	0	0	0	0
Clostridium_saccharoperbutylacetonicum	0	0	0	0	0	0	0	0	0	0	0	0	0	0	0	0	0	0	0	0	0	0	0	0	0	0	0	0	0	0	0	0	0	0	0	0	0	0	0	0	0	0	0	0	0	0	0	0	0
Clostridium_scindens	0	0	0	0	0	0	0	0	0	0	0	0	0	0	0	0	0	0	0	0	0	0	0	0	0	0	0	0	0	0	0	0	0	0	0	0	0	0	0	0	0	0	0	0	0	0	0	0	0
Clostridium_senegalense	0	0	0	0	0	0	0	0	0	0	0	0	0	0	0	0	0	0	0	0	0	0	0	0	0	0	0	0	0	0	0	0	0	0	0	0	0	0	0	0	0	0	0	0	0	0	0	0	0
Clostridium_spiroforme	0	0	0	0	0	0	0	0	0	0	0	0	0	0	0	1.3294e-05	0	0	0	0	0	0	0	0	0	0	0	0	0	0	0	0	0	0	0	0	0	0	0	0	0	0	0	0	0	0	0	0	0
Clostridium_sporogenes	0	0	0	0	0	0	0	0	0	0	0	0	0	0	0	0	0	0	0	0	0	0	0	0	0	0	0	0	0.000107724	0.000705716	0	0	0	0	0	0	0	0	0	0	0	0	2.44147e-05	0	0	0	0	0	0
Clostridium_symbiosum	0	0	0	0	0	0	0	0	0	0	0	0	0	0	0	0	0	0	0	0	0	0	0	0	0	0	0	0	0	0	0	0	0	4.8534e-06	0	0	0	0	0	0	0	0	0	0	0	0	0	0	0
Clostridium_tertium	0	0	0	0	0	0	0.000298775	0	0	0	0	0	0	0	0	0	0	0	0	0	0	0	0	0	0	0	0	0	0	0	0	0	0	0	0	0	0	0	0	0	0	0	0	0	0	0	0	0	0
Clostridium_thermocellum	0	0	0	0	0	0	0	0	0	0	0.000130225	0	0	0	0	0	0	0	0	0	0	0	0	0	0	0	0	0	0	0	0	0	0	0	0	0	0	0	0	0	0	0	0	0	0	0	0	0	0
Clostridium_ventriculi	0	0	0	0	0.000178031	0	0	0	0	0	0	0	0	0	0	0	0	0	0	0	0	0	0	0	0	0	0	0	0	0	0	0	0	4.8534e-06	0	0	0	0	0	0	0	0	2.44147e-05	0	0	0	0	0	0
Cnuella_takakiae	0	0	0	0	0	0	0	0	0	0	0	0	0	0	0	0	0	0	0	0	0	0	0	0	0	0	0	0	0	0.00352858	0	0	0	0	0	0	0	0	0	0	0	0	0	0	0	0	0	0	5.57491e-05
Cnuibacter_physcomitrellae	0	0	0	0	0	0	0	0.00548446	0	0	0	0	0	0	0	0	0	0	0	0	0	0	0	0	0	0	5.36265e-05	0	0	0.00105857	2.43635e-05	0	0	0	0.00107354	0	0	0	0.000337553	0	0	0	9.76586e-05	0	0	0	0	0	0
Cobetia_crustatorum	0	0	0	0	0	0	0	0	0	0	0	0	0	0	0	0	0	0	0	0	0	0	0	0	0	0	0	0	0	0.000705716	0	0	0	0	0	0	0	0	0	0	0	0	0	0	0	0	0	0	0
Colibacter_massiliensis	0	0	0	0	0	0	0	0	0	0	0	0	0	0	0	0	0	0	0	0	0	0	0	0	0	0	0	0	0	0	0	0	0	0	0	0	0	0	0	0	0	0	0	0	0	0	0	0	0
Colletotrichum_chlorophyti	0	0	0	0	0	0	0	0	0	0.000127779	0	0	0	0	0	0	0	0	0	0	0	0	0	0	0	0	0	0	0	0	0	0	0	0	0	0	0	0	0	0	0	0	0	0	0	0	0	0	0
Colletotrichum_gloeosporioides	0	0	0	0	0	0	0	0	0	0	0	0	0	0	0	0	0	0	0	0	0	0	0	0	0	0	0	0	0	0	0	0	0	0	0	0	0	0	0	0	0	0	0	0	0	0	0	0	0
Colletotrichum_musae	0	0	0	0	0	0	0	0	0	0	0	0	0	0	0	0	0	0	0	0	0	0	0	0	0	0	0	0	0	0	0	0	0	0	0	0	0	0	0.000337553	0	0	0	0	0	0	0	0	0	0
Colletotrichum_shisoi	0	0	0	0	0	0	0	0	0	0	0	0	0	0	0	0	0	0	0	0	0	0	0	0	0	0	0	0	0	0	0	0	0	0	0	0	0	0	0	0	0	0	0	0	0	0	0	0	0
Colletotrichum_siamense	0	0	0	0	0	0	0	0	0	0	0	0	0	0	0	0	0	0	0	0	0	0	0	0	0	0	0	0	0	0	0	0	0	0	0.000214707	0	0	0	0	0	0	0	0	0	0	0	0	0	0
Colletotrichum_sidae	0.00832342	0	0	0	0	0	0	0	0	0	0	0	0	0	0	0	0	0	0	0	0	0	0	0	0	0	0	0	0	0	0	0	0	0	0	0	0	0	0.000337553	0	0	0	0	0	0	0	0	0	5.57491e-05
Colletotrichum_tofieldiae	0	0	0	0	0	0	0	0	0	0.000127779	0	0	0	0	0	0	0	0	0	0	0	0	0	0	0	0	0	0	0	0	0	0	0	0	0	0	0	0	0	0	0	0	0	0	0	0	0	0	0
Collimonas_fungivorans	0	0	0	0	0	0	0	0	0	0.000127779	0	0	0	0	0	0	0	0	0	0	0	0	0	0	0	0	0	0	0	0.00247001	0	0	0	0	0	0	0	0	0	0	0	0	4.88293e-05	0	0	0	0.000554324	0	0
Collimonas_pratensis	0	0	0	0	0.000534093	0.000246214	0	0	0	0.000383338	0	0	0	0	0	0	0	0	0	0	0	0	0	0	0	0	0	0	0.000107724	0.00211715	2.43635e-05	0	0	0	0	0	0	0	0	0	0	0	2.44147e-05	0	0	0	0	0	0.000111498
Collinsella_aerofaciens	0	0	0	0	0.000890155	0.000615536	0.0011951	0	0	0.000127779	0	0	0	0	0	1.3294e-05	0	0	0	0	0	0	0	0	0	0	0	0	0	0	0	0	0	0	0	0	0	0	0	0	0	0	0.000280769	0	0	0	0	0	0
Collinsella_intestinalis	0	0	0	0	0	0	0	0	0	0	0	0	0	0	0	0	0	0	0	0	0	0	0	0	0	0	0	0	0	0	0	0	0	0	0	0	0	0	0	0	0	0	0	0	0	0	0	0	0
Collinsella_stercoris	0	0	0	0	0	0	0	0	0	0	0	0	0	0	0	0	0	0	0	0	0	0	0	0	0	0	0	0	0	0	0	0	0	0	0	0	0	0	0	0	0	0	0	0	0	0	0	0	0
Comamonadaceae_bacterium	0	0	0	0	0	0	0	0	0	0	0	0	0	0	0	0	0	0	0	4.3018e-06	0	0	0	0	0	0	0	0	0	0	0	0	0	0	0	0	0	0	0	0	0	0	0	0	0	0	0	0	0
Comamonas_aquatica	0.00118906	0	0	0	0	0.00123107	0	0	0.00276625	0.00383338	0.000130225	0.0175439	0	0	0	5.31759e-05	0.00107991	0	0	0	0.00314136	0.000112549	0	0	0	0	0	0	0	0.000705716	2.43635e-05	0	0	0	0.00397209	0	0	0	0.00151899	0	0	0	4.88293e-05	0	0	0	0	0	0.000710801
Comamonas_kerstersii	0	0	0	0	0	0	0	0	0	0.000127779	0	0	0	1.95191e-05	0	0	0	0	0	4.3018e-06	0.00104712	0	0	0	0	0	0	0	0	0	0	0	0	0	0.00085883	0	0	0	0	0	0	0	0	0	0	0	0	0	0
Comamonas_terrae	0	0	0	0	0	0.000246214	0	0	0	0	0	0	0	1.95191e-05	0	0	0	0	0	0	0	0	0	0	0	0	0	0	0.000107724	0	0	0	0	0	0.000644122	0	0	0	0	0	0	0	4.88293e-05	0	0	0	0	0	0
Comamonas_terrigena	0	0	0	0	0	0	0	0	0	0	0.000130225	0	0	3.90381e-05	0	2.6588e-05	0.00107991	0	0.00546448	0	0.00209424	0.000112549	0	0	0	0	0	0	0	0	0	0	0	0	0	0.0616541	0	0	0	0	0	0	0	0	0	0	0	0	0.00359582
Comamonas_testosteroni	0.00118906	0	0	0	0.000267046	0.000492429	0.000298775	0.00548446	0	0.00191669	0	0	0	0	4.2996e-05	0	0.00107991	0	0.00546448	0	0	0	0	0	0	0	0	0	0	0	0	3.56043e-05	0	0	0	0	0	0	0.00236287	0.00011422	0	0	6.10366e-05	0.000133191	0	0	0.000554324	0	0.000362369
Conchiformibius_kuhniae	0	0	0	0	0	0	0	0	0	0	0	0	0	0	0	0	0	0	0	0	0	0	0	0	0	0	0	0	0	0	0	0	0	0	0	0	0	0	0	0	0	0	0	0	0	0	0	0	0
Conexibacter_woesei	0	0	0	0	0	0.000246214	0	0	0	0.000511117	0	0	0	0	0	0	0	0	0	0	0	0	0	0	0	0	0	0	0	0	0	0	0	0	0	0	0	0	0	0	0	0	0	0	0	1.47859e-05	0	0	0
Coniosporium_apollinis	0	0	0	0	0	0	0	0	0	0	0	0	0	0	0	0	0	0	0	0	0	0.000112549	0	0	0	0	0	0	0	0	0	0	0	0	0	0	0	0	0	0	0	0	0	0	0	0	0	0	0
Coprobacter_fastidiosus	0	0	0	0	0	0	0	0	0	0	0	0	0	0	0	0	0	0	0	0	0	0	0	0	0	0	0	0	0	0	0	0	0	0	0	0	0	0	0	0	0	0	0	0	0	0	0	0	0
Coprococcus_catus	0	0	0	0	0	0	0.000298775	0	0	0	0	0	0	0	0	0	0	0	0	0	0	0	0	0	0	0	0	0	0	0	0	0	0	0	0	0	0	0	0	0	0	0	2.44147e-05	0	0	0	0	0	0
Coprococcus_comes	0	0	0.00299401	0	0	0.000246214	0.000298775	0	0	0	0	0	0	0	0	0	0	0	0	4.3018e-06	0	0	0	0	0	0	0	0	0	0	0	0	0	4.8534e-06	0	0	0	0	0	0	0	0	2.44147e-05	0	0	0	0	0	0
Coprococcus_eutactus	0	0	0	0	0	0	0.000298775	0	0	0.000255558	0	0	0	0	0	0	0	0	0	0	0	0	0	0	0	0	0	0	0	0.000705716	0	0	0	0	0	0	0	0	0	0	0	0	0	0	0	0	0	0	0.00015331
Corallococcus_coralloides	0	0	0	0	0	0	0	0	0	0	0	0	0	0	0	0	0	0	0	0	0	0	0	0	0	0	0	0	0	0	0	0	0	0	0	0	0	0	0.000337553	0	0	0	0	0	0	0	0	0	0
Coriobacteriales_bacterium_DNF00809	0	0	0	0	0	0	0	0	0	0	0	0	0	0	0	1.3294e-05	0	0	0	0	0	0	0	0	0	0	0	0	0	0	0	0	0	4.8534e-06	0.000429415	0	0	0	0	0	0	0	0	0	0	0	0	0	0
Corynebacterium_accolens	0.00356718	0	0.00449102	0	0	0	0.0023902	0	0	0	0.000130225	0	0	3.90381e-05	0.011136	0	0	0	0.00546448	0	0	0.000112549	0	0	0	0	0	0	0	0	0.000219272	8.90107e-05	0	0	0.00236178	0	0.00164474	0	0.00185654	0	0	0.0118577	0.000122073	0	0	0	0	0	0.0013101
Corynebacterium_afermentans	0	0	0	0	0	0	0.000298775	0	0	0.00351393	0	0	0	0	0	0	0	0	0.00546448	0	0	0	0	0	0	0	0	0	0	0	0	0	0	0	0.000644122	0	0	0	0.000506329	0	0	0	0	0	0	0	0	0	0.000808362
Corynebacterium_ammoniagenes	0	0	0	0	0	0	0	0	0	0	0	0	0	0	0	0	0	0	0	0	0	0	0	0	0	0	0	0	0	0.000705716	0	0	0	0	0	0	0	0	0.000337553	0	0	0	2.44147e-05	0	0	0	0	0	0
Corynebacterium_amycolatum	0	0	0	0	0	0.000246214	0.000448163	0	0	0	0	0	0	1.95191e-05	0	0	0	0	0	8.60359e-06	0	0	0	0	0	0	0	0	0	0	0	0	0	0	0	0	0	0	0.000337553	0	0.000924214	0	0.000219732	0	0	0	0	0	5.57491e-05
Corynebacterium_argentoratense	0	0	0	0	0	0	0	0	0	0	0	0	0	0	0	0	0	0	0	8.60359e-06	0	0	0	0.166667	0	0.00055991	0	0	0	0	2.43635e-05	0	0	0	0	0	0	0	0	0.0158766	0	0	0	0	0	0.0679412	0	0	0
Corynebacterium_atypicum	0	0	0	0	0	0	0	0	0	0	0	0	0	1.95191e-05	0	0	0	0	0	0	0	0	0	0	0	0	0	0	0	0	0	0	0	0	0	0	0	0	0	0	0	0	0	0	0	0	0	0	0
Corynebacterium_aurimucosum	0	0.000523165	0.00898204	0	0	0.000861751	0	0	0	0	0	0	0.000184911	5.85572e-05	0	0	0	0	0	4.73198e-05	0.00104712	0	0	0	0	0	0	0	0	0.000705716	3.65453e-05	0	0	0	0.00257649	0.00300752	0.00164474	0	0.00236287	0	0	0.0118577	0	0	0	0	0	0	0.0013101
Corynebacterium_auriscanis	0	0	0	0	0	0	0	0	0	0	0	0	0	0	0	0	0	0	0	0	0	0	0	0	0	0	0	0	0	0	0	0	0	0	0	0	0	0	0	0	0	0	0	0	0	0	0	0	0
Corynebacterium_bovis	0	0	0	0	0.000178031	0	0	0	0	0	0	0	0	0	0	0	0	0	0	0	0	0	0	0	0	0	0	0	0	0	0	0	0	0	0	0	0	0	0	0	0	0	0	0	0	0	0	0	0
Corynebacterium_callunae	0	0	0	0	0	0	0	0	0	0	0	0	0	0	0	2.6588e-05	0	0	0	8.60359e-06	0	0	0	0	0	0	0	0	0	0	0	0	0	0	0.0164251	0	0	0	0	0	0	0	0	0	0	0	0	0	0
Corynebacterium_casei	0	0	0	0	0	0.000615536	0.000298775	0	0	0	0	0	0	0	0	0	0	0	0	1.29054e-05	0	0	0	0	0	0	0	0	0	0	2.43635e-05	0	0	0	0.000214707	0	0	0	0	0	0	0	2.44147e-05	0	0	0	0	0	0.000404181
Corynebacterium_coyleae	0	0	0.00299401	0	0	0	0	0	0	0	0	0	0	0	0	0	0	0	0	0	0	0	0	0	0	0	0	0	0	0	0	0	0	0	0	0	0	0	0	0	0	0	0	0	0	0	0	0	5.57491e-05
Corynebacterium_cystitidis	0	0	0	0	0	0	0	0	0	0	0	0	0	0	0	0	0	0	0	3.87162e-05	0	0	0	0	0	0	0	0	0	0	0	0	0	0	0	0	0	0	0	0	0	0	0	0	0	0	0	0	0
Corynebacterium_diphtheriae	0	0.000116259	0	0	0	0.000246214	0	0	0	0	0	0	0.000168101	0	0	0	0	0	0	0.000227995	0	0	0	0	0	0	0	1.15154e-05	0	0	0	0	0	0	0	0.00300752	0	0	0	0	0	0	4.88293e-05	0	0	4.43577e-05	0	0	0.00015331
Corynebacterium_durum	0	0	0	0	0.000178031	0	0.000298775	0	0	0.0024278	0.000130225	0	0	1.95191e-05	0	0.000292468	0	0	0.0163934	4.3018e-06	0	0	0	0	0	0	0.000134066	0	0	0.000705716	0	0	0	0	0.00085883	0.00300752	0	0	0.000675105	0.0438607	0	0	0	0	0	0.00102023	0	0	5.57491e-05
Corynebacterium_efficiens	0	0	0	0	0	0.000246214	0	0	0	0	0	0	0	0	0	0	0	0	0	0	0	0	0	0	0	0	0	0	0	0	2.43635e-05	0	0	0	0.000214707	0	0	0	0	0	0	0	2.44147e-05	0	0	0	0	0	0
Corynebacterium_epidermidicanis	0	0	0	0	0	0	0	0	0	0	0	0	0	0	0	0	0	0	0.00546448	0	0	0	0	0	0	0	0	0	0	0	0	0	0	0	0	0	0	0	0	0	0	0	0	0	0	0	0	0	0
Corynebacterium_falsenii	0	0	0	0	0.00106819	0.000861751	0.000746938	0	0	0.000255558	0	0	0	0	0	0	0	0	0	0	0	0	0	0	0	0	0	0	0	0	0	0	0	0	0.000214707	0	0	0	0	0	0	0	0.000476086	0	0	0	0	0	0.000209059
Corynebacterium_flavescens	0	0	0	0	0	0.000246214	0	0	0.0193638	0	0	0	0	0	4.2996e-05	0	0	0	0	8.60359e-06	0	0	0	0	0	0	0	0	0	0.000705716	0	3.56043e-05	0	0	0	0	0	0	0.000337553	0	0	0	0	0	0	0	0	0	0
Corynebacterium_freiburgense	0	0	0	0	0	0	0	0	0	0	0	0	0	0	0	0	0	0	0	0	0	0	0	0	0	0	0	0	0	0	0	0	0	0	0	0	0	0	0	0	0	0	0	0	0	0	0	0	0
Corynebacterium_freneyi	0	0	0	0	0.000178031	0.000984858	0.000298775	0	0	0	0	0	0.000268962	0	0	0	0	0	0	0.00012045	0	0	0	0	0	0	0	0	0.000269309	0	0	0	0	0	0	0	0	0	0	0	0	0	2.44147e-05	0	0	0	0	0	0
Corynebacterium_genitalium	0	0	0.00299401	0	0	0	0	0	0	0.000958344	0	0	0	0	0	0	0	0	0.00546448	0	0	0	0	0	0	0	0	0	0	0	0	0	0	0	0	0	0	0	0.000337553	0	0	0	0	0	0.016129	0	0	0	0
Corynebacterium_glucuronolyticum	0	0	0	0	0	0	0.000448163	0.00548446	0	0.00434449	0.000260451	0	0	0	0	0	0	0	0	0	0.00209424	0	0	0	0	0	0	0	0	0.000705716	0	0	0	0	0.000644122	0	0	0	0.00118143	0	0	0	2.44147e-05	0	0	1.47859e-05	0.000554324	0	5.57491e-05
Corynebacterium_glutamicum	0	0	0	0	0	0	0.000298775	0	0	0	0	0	0	0	0	0	0.00107991	0	0	0	0	0	0	0	0	0	0	0	0.000107724	0.00282287	0	3.56043e-05	0	0	0.000429415	0	0	0	0.000506329	0.00011422	0	0	0.00018311	0	0	0	0.000554324	0	0.000209059
Corynebacterium_halotolerans	0	0	0.00299401	0	0	0.000246214	0	0	0	0	0	0	0	0	0	0	0	0	0	4.3018e-06	0	0	0	0	0	0	5.36265e-05	0	0	0	0	0	0	0	0	0	0	0	0	0	0	0	0	0	0	0	0	0	0
Corynebacterium_humireducens	0	0	0	0	0.000178031	0	0	0	0	0	0	0	0	0	0	0	0	0	0	0	0	0	0	0	0	0	0	0	0	0	0	0	0	0	0	0	0	0	0	0	0	0	0.000146488	0	0	0	0	0	5.57491e-05
Corynebacterium_ihumii	0	0	0	0	0	0	0	0	0	0.0018528	0	0	0	0	0	0	0	0	0	4.3018e-06	0	0	0	0	0	0	0	0	0	0	2.43635e-05	3.56043e-05	0	0	0	0	0	0	0.000337553	0	0	0	0	0.000133191	0	0	0	0	0.000404181
Corynebacterium_imitans	0	0	0	0	0	0	0	0	0	0.000255558	0	0	3.36202e-05	1.95191e-05	0	0	0	0	0	0	0	0	0	0	0	0	0	0	0	0	0	0	0	7.2801e-06	0	0	0	0	0	0	0	0	0	0.000133191	0	0	0	0	0
Corynebacterium_jeddahense	0	0	0.00299401	0	0	0	0	0	0	0.000383338	0	0	0	0	0	0	0	0	0	0	0	0.000112549	0	0	0	0	0	0	0	0	0	0	0	0	0	0	0	0	0.00236287	0	0	0	2.44147e-05	0	0	0	0	0	0.00015331
Corynebacterium_jeikeium	0	0	0.00748503	0	0.000178031	0	0	0	0	0	0	0	0.000134481	9.75953e-05	0	0	0	0	0	1.29054e-05	0	0.000225098	0	0	0	0.00391937	0	0	0	0.000705716	2.43635e-05	0	0	0	0.000429415	0	0	0	0.00101266	0	0	0	0	0.000133191	0	1.47859e-05	0	0	0.000808362
Corynebacterium_kroppenstedtii	0.00118906	0.000232518	0	0	0	0	0	0	0	0	0	0	0	0	0	0	0	0	0	6.02252e-05	0	0	0	0	0	0	0	0	0	0.000705716	0	0	0	0	0.000429415	0	0	0	0	0	0	0	0	0	0	0	0	0	0
Corynebacterium_kutscheri	0	0	0	0	0	0	0	0	0	0	0	0	0	0	0	0	0	0	0	0	0	0	0	0	0	0	0	0	0	0	0	0	0	0	0	0	0	0	0	0	0	0	0	0	0	0	0	0	0
Corynebacterium_lipophiloflavum	0	0	0	0	0	0	0	0	0	0	0	0	0	0	0	0	0	0	0	0	0	0	0	0	0	0	0	0	0	0	0	0	0	0	0	0	0	0	0	0	0	0	0	0	0	1.47859e-05	0	0	0
Corynebacterium_lowii	0	0	0	0	0	0	0	0	0	0	0	0	0	0	0	0	0	0	0	0	0	0	0	0	0	0	0	0	0	0	0	0	0	0	0	0	0	0	0	0	0	0	0	0	0	0	0	0	0
Corynebacterium_maris	0	0	0	0	0	0.000615536	0	0	0	0.000127779	0	0	0	0	0	0	0	0	0	0	0	0	0	0	0	0	0	0	0	0	0	0	0	0	0	0	0	0	0	0	0	0	8.54513e-05	0	0	0	0	0	5.57491e-05
Corynebacterium_massiliense	0	0	0	0	0	0	0	0	0	0	0	0	0	0	0	0	0	0	0	3.44144e-05	0	0	0	0	0	0	0	0	0	0	0	0	0	0	0	0	0	0	0	0	0	0	0	0	0	0	0	0	5.57491e-05
Corynebacterium_mastitidis	0	0	0	0	0	0	0	0	0	0	0	0	0	0	0	0	0	0	0	0	0	0	0	0	0	0	0	0	0	0	0	0	0	0	0	0	0	0	0	0	0	0	0	0	0	0	0	0	0
Corynebacterium_matruchotii	0	0	0.00299401	0	0	0.000615536	0	0	0	0.00287503	0.000651126	0	0	1.95191e-05	0	0.000518465	0	0.00683413	0.010929	1.72072e-05	0	0.000112549	0	0	0	0	0	1.15154e-05	0	0.00105857	6.09088e-05	8.90107e-05	0.000647459	0	0.000644122	0	0	0.000824063	0.00101266	0	0	0	0	0	0	1.47859e-05	0	0	5.57491e-05
Corynebacterium_minutissimum	0	0.000116259	0	0	0	0	0	0	0	0.000255558	0	0	0	0.000175671	0	0	0	0	0	0.000107545	0	0.000112549	0	0	0	0	0	0	0	0	0	0	0	0	0	0	0	0	0.000675105	0.00011422	0	0	0	0	0	0	0.000554324	0	0.000599303
Corynebacterium_mycetoides	0	0	0	0	0	0	0	0	0	0	0	0	0	0	0	0	0	0	0	0	0	0	0	0	0	0	0	0	0	0	0	0	0	0	0	0	0	0	0	0	0	0	0	0	0	0	0	0	0
Corynebacterium_oculi	0	0	0	0	0	0	0.000298775	0	0.00276625	0	0	0	0	0	0	0	0	0	0	4.3018e-06	0	0	0	0	0	0	0	0	0	0	0	0	0	0	0	0	0	0	0	0	0	0	0	0	0	0	0	0	0.000209059
Corynebacterium_pilosum	0	0	0	0	0	0	0	0	0	0	0	0	0	0	0	0	0	0	0	0	0	0	0	0	0	0	0	0	0	0	0	0	0	0	0	0	0	0	0	0	0	0	0	0	0	0	0	0	0
Corynebacterium_propinquum	0.00237812	0	0	0	0.00124622	0.000492429	0	0	0	0.00447227	0.000130225	0	5.04303e-05	0	0.000644939	3.98819e-05	0	0	0	0.0722143	0	0	0	0	0	0	0	0	0	0.00211715	0.000109636	0	0.000647459	0	0	0.00300752	0	0	0.00118143	0	0	0	0.000939964	0	0	0	0	0	5.57491e-05
Corynebacterium_pseudodiphtheriticum	0	0	0	0	0	0	0	0	0	0.00268336	0.000130225	0	0	0	4.2996e-05	0	0	0	0	0	0	0	0	0	0	0	0	9.21234e-05	0	0	2.43635e-05	0	0	0	0	0	0	0	0	0	0	0	2.44147e-05	0	0	1.47859e-05	0	0	0
Corynebacterium_pseudogenitalium	0	0	0.010479	0	0	0	0.000448163	0	0	0	0	0.0175439	0	5.85572e-05	0	0	0	0	0.00546448	0.000864661	0	0.000225098	0	0	0	0	0	0	0	0	6.09088e-05	0	0	9.70681e-06	0.00085883	0.0075188	0	0	0.00270042	0	0.000924214	0	0	0	0	1.47859e-05	0	0.000518941	0.00144948
Corynebacterium_pseudotuberculosis	0	0	0	0	0	0	0	0	0	0	0	0	0	0	0	0	0	0	0	8.60359e-06	0	0	0	0	0	0	0	0	0	0	0	0	0	0	0	0	0	0	0	0	0	0	0	0	0	0	0	0	0
Corynebacterium_resistens	0	0	0.00299401	0	0	0	0	0	0	0.0012139	0	0	1.68101e-05	0	0	1.3294e-05	0	0	0	8.60359e-06	0	0	0	0	0	0	0	0	0	0	9.7454e-05	0	0	0	0.00161031	0.00300752	0	0	0	0	0	0	0	0	0	0	0	0	0.00015331
Corynebacterium_simulans	0	0	0	0	0.000712124	0.000861751	0	0	0	0.000383338	0	0	0.000386633	0.000253748	0	0	0	0	0	8.60359e-06	0	0.000112549	0	0	0	0	0	0	0	0	0	0	0	7.2801e-06	0	0	0	0	0	0	0	0	0	0	0	0	0	0	0.000209059
Corynebacterium_singulare	0	0	0.00299401	0	0	0.000246214	0.00059755	0	0	0.00146946	0	0	0	5.85572e-05	0	0	0	0	0	0	0	0.000225098	0	0	0	0	0	0	0	0.00105857	0.000170545	0	0	0	0.00107354	0	0	0	0.000675105	0	0	0.0118577	0	0	0	0	0	0	0.00119861
Corynebacterium_sputi	0	0	0	0	0	0	0.000298775	0	0	0	0	0	0	0	0	0	0	0	0	0	0	0	0	0	0	0	0	0	0	0	0	0	0	0	0	0	0	0	0	0	0	0	9.76586e-05	0	0	0	0	0	0
Corynebacterium_stationis	0	0	0	0	0	0.000861751	0.0023902	0	0	0.000127779	0	0	0	0	0	0	0	0	0	8.60359e-06	0	0	0	0	0	0	0	0	0	0	0	0	0	0	0	0	0	0	0.00101266	0	0	0	0.000634781	0	0	0	0	0	0.000655052
Corynebacterium_striatum	0	0.00447596	0.00299401	0	0.000178031	0	0	0	0	0	0	0.0584795	0.974768	3.90381e-05	0	0	0.00107991	0	0	0.00299405	0.00104712	0.000112549	0	0	0	0	0	0.000834869	0	0.000705716	0	0	0	0.00246796	0.00107354	0.221053	0	0	0.00337553	0	0.00138632	0	2.44147e-05	0	0	0	0	0	0.00415331
Corynebacterium_terpenotabidum	0	0	0	0	0	0	0	0	0	0	0	0	0	0	0	0	0	0	0	0	0	0	0	0	0	0	0	0	0	0	0	0	0	0	0	0	0	0	0	0	0	0	2.44147e-05	0	0	0	0	0	0
Corynebacterium_timonense	0	0	0.00299401	0	0	0	0	0	0	0	0	0	0	0	0	0	0	0	0	0	0	0	0	0	0	0	0	0	0	0	0	0	0	0	0	0	0	0	0.000337553	0	0	0	0	0	0	0	0	0	0
Corynebacterium_tuberculostearicum	0	0.000116259	0	0	0	0	0.000298775	0	0	0	0.000130225	0	1.68101e-05	3.90381e-05	0	1.3294e-05	0	0	0	4.3018e-06	0.00104712	0	0	0	0	0.00055991	0	0	0	0	0	5.34064e-05	0	0	0.00161031	0	0	0	0.00135021	0	0	0	0	0	0	0	0	0	0.000808362
Corynebacterium_tuscaniense	0	0	0	0	0	0	0	0	0	0	0	0	3.36202e-05	0	0	0	0	0	0	4.3018e-06	0	0	0	0	0	0	0	0	0	0	0	0	0	0	0	0	0	0	0	0	0	0	0	0	0	0	0	0	0
Corynebacterium_ulcerans	0	0	0	0	0	0	0	0	0	0	0	0	0	0	0	0	0	0	0	4.3018e-06	0	0	0	0	0	0	0	0	0	0	0	0	0	0	0	0	0	0	0	0	0	0	0	0	0	0	0	0	0
Corynebacterium_urealyticum	0	0	0	0	0	0	0	0	0	0	0	0	0	0	0	0	0	0	0	8.60359e-06	0	0	0	0	0	0	0	0	0	0	0	0	0	0	0	0	0	0	0	0	0	0	0	0	0	0	0	0	0
Corynebacterium_ureicelerivorans	0	0.000116259	0.00748503	0	0	0.000246214	0	0	0	0	0.000130225	0	0	0	0	0	0	0	0	8.60359e-06	0	0	0	0	0.05	0	0	0	0	0	0	0	0	0	0.00203972	0	0	0	0.000506329	0	0	0	4.88293e-05	0	0	0	0	0	0.000209059
Corynebacterium_variabile	0	0	0	0	0.00142425	0.00566293	0.00657305	0	0.0055325	0.000255558	0	0	0	0	0	0	0	0	0	4.3018e-06	0	0.000112549	0	0	0	0	0	0	0	0	3.65453e-05	0	0	0	0	0	0	0	0.000337553	0	0	0	0.00377206	0	0	2.95718e-05	0	0	0.000557491
Corynebacterium_vitaeruminis	0	0	0	0	0.000178031	0	0	0	0	0.000127779	0	0	0	0	0	0	0	0	0	0	0	0	0	0	0	0	5.36265e-05	0	0	0	0	0	0	0	0	0	0	0	0.000337553	0	0	0	4.88293e-05	0	0	0	0	0	0
Corynebacterium_xerosis	0	0	0	0	0.00356062	0.00701711	0.00851509	0	0	0.000127779	0	0	0	0	0	0	0	0	0	8.60359e-06	0	0	0	0	0	0	0	0	0.000107724	0	0.000109636	0	0	0	0.00085883	0.00300752	0	0	0	0	0	0	0.00422374	0	0	0	0	0	0.000710801
Corynespora_cassiicola	0	0	0	0	0.000178031	0	0	0	0	0.000127779	0	0	0	0	0	0	0	0	0	0	0	0	0	0	0	0	0	0	0	0	0	0	0	0	0.000214707	0	0	0	0	0	0	0	0	0	0	0	0	0	0
Crenobacter_luteus	0	0	0	0	0	0	0	0	0	0.000255558	0.000130225	0	0	1.95191e-05	0	0	0	0	0	0	0.00104712	0	0	0	0	0	0	0	0.000107724	0	0	0	0	0	0	0	0	0	0	0	0	0	2.44147e-05	0	0	0	0	0	5.57491e-05
Croceicoccus_mobilis	0	0	0	0	0.000267046	0.000246214	0	0	0	0.000638896	0	0	0	0	0	0	0	0	0	0	0	0	0	0	0	0	0	0	0	0.00105857	3.65453e-05	0	0.000971188	4.8534e-06	0.0030059	0	0	0	0.00185654	0	0	0	0	0	0.016129	0	0.000554324	0	0.000111498
Cronobacter_condimenti	0	0	0	0	0	0	0	0	0	0	0	0	0	0	0	0	0	0	0	0	0	0	0	0	0	0	0	0	0	0	0	0	0	0	0	0	0	0	0	0	0	0	0	0	0	0	0	0	0
Cronobacter_dublinensis	0	0	0	0	0	0	0	0	0	0	0	0	0	0	0	0	0	0	0	0	0	0	0	0	0	0	0	0	0	0	0	0	0	0	0	0	0	0	0	0	0	0	0	0	0	0	0	0	0
Cronobacter_malonaticus	0	0	0	0	0	0	0	0	0	0	0	0	0	0	0	0	0	0	0	0	0	0	0	0	0	0	0	0	0	0	0	0	0	0	0	0	0	0	0	0	0	0	0	0	0	0	0	0	0
Cronobacter_muytjensii	0	0	0	0	0	0	0	0	0	0	0	0	0	0	0	0	0	0	0	0	0	0	0	0	0	0	0	0	0	0	0	0	0	0	0	0	0	0	0	0	0	0	0	0	0	0	0	0	0
Cronobacter_sakazakii	0	0	0	0	0	0	0	0	0	0	0	0	0	0	0.0010319	0	0.00107991	0	0	8.60359e-06	0.00418848	0	0	0	0	0	0	0	0	0	0	0	0	0	0	0	0	0	0	0	0	0	2.44147e-05	0	0	0	0	0	0
Cronobacter_turicensis	0	0	0	0	0	0	0	0	0	0	0	0	0	0	0	0	0	0	0	0	0	0	0	0	0	0	0	0	0	0	0	0	0	0	0	0	0	0	0	0	0	0	0	0	0	0	0	0	0
Crossiella_equi	0	0	0	0	0	0	0	0	0	0	0	0	0	0	0	0	0	0	0	0	0	0	0	0	0	0	0	0	0	0	0	0	0	0	0	0	0	0	0	0	0	0	0	0	0	0	0	0	0
Cruoricaptor_ignavus	0	0	0	0	0	0	0	0	0	0.000255558	0	0	0	0	0	1.3294e-05	0	0	0	0	0.0146597	0	0	0	0	0	0	0	0	0.000705716	0	0	0	0	0	0	0	0	0.000337553	0	0	0	2.44147e-05	0	0	0	0	0	0
Cryobacterium_arcticum	0	0	0	0	0	0	0	0	0	0	0	0	0	0	0	1.3294e-05	0	0	0	0	0	0	0	0	0	0	0	0	0	0	0	0	0	0	0	0	0	0	0	0	0	0	0	0	0	0	0	0	0
Cryptobacterium_curtum	0	0	0	0	0	0	0	0	0	0	0	0	0	0	0	0	0	0	0	0.000210788	0	0	0	0	0	0	0.000294946	0	0.000107724	0	0	0	0	0	0	0	0	0	0.000506329	0	0	0	0	0	0	0	0	0	0
Cryptococcus_neoformans	0	0	0	0	0	0	0	0	0	0	0	0	0	0	0	0	0	0	0	0	0	0	0	0	0	0	0	0	0	0	0	0	0	0	0	0	0	0	0	0	0	0	0	0	0	0	0	0	0
Cryptosporangium_arvum	0	0	0	0	0	0	0	0	0	0	0	0	0	0	0	0	0	0	0	0	0	0	0	0	0	0	0	0	0	0	0	0	0	0	0.000214707	0	0	0	0	0	0	0	0	0	0	0	0	0	0
Culturomica_massiliensis	0	0	0	0	0	0	0	0	0	0	0	0	0	0	0	1.3294e-05	0	0	0	0	0	0	0	0	0	0	0	0	0	0	0	0	0	0	0	0	0	0	0	0	0	0	0	0	0	0	0	0	0
Cupriavidus_gilardii	0	0	0	0	0	0.000246214	0	0.00548446	0	0.000766675	0	0	0	0	0	0	0	0	0	0	0	0	0	0	0	0	0	0	0.000107724	0	0	0	0	0	0.00107354	0	0	0	0.000337553	0	0	0	2.44147e-05	0	0	0	0	0	0.000111498
Cupriavidus_metallidurans	0	0	0	0	0	0.00357011	0.000298775	0	0	0.000894454	0	0	0	3.90381e-05	0	0	0	0	0	4.3018e-06	0	0	0.043956	0.000884173	0	0	0	0	0	0	0	5.34064e-05	0	0	0.00257649	0	0	0	0	0	0	0	0	0	0	0	0.000554324	0	0.000850174
Cupriavidus_nantongensis	0	0	0	0	0	0.000246214	0	0	0	0.000127779	0	0	0	0	0	0	0	0	0	0	0	0	0	0	0	0	0	0	0	0	0	0	0	0	0	0	0	0	0.000337553	0	0	0	2.44147e-05	0	0	0	0	0	0.000111498
Cupriavidus_necator	0	0.000232518	0.00449102	0	0.000267046	0	0.00388408	0	0	0.000255558	0	0	0	0	0	0	0	0	0	0	0	0	0	0	0	0	0	0	0	0.0296401	7.30905e-05	8.90107e-05	0	0	0.00762211	0.00300752	0	0	0	0	0	0	2.44147e-05	0	0	0	0	0	0.0050453
Cupriavidus_pauculus	0	0	0	0	0	0.000492429	0	0	0	0.000127779	0	0	0	1.95191e-05	0	0	0	0	0	4.3018e-06	0	0	0	0	0	0	0	0	0	0	0	0	0	0	0.000214707	0	0	0	0.000337553	0	0	0	8.54513e-05	0	0	0	0	0	0.000362369
Cupriavidus_taiwanensis	0	0	0	0	0	0.000246214	0	0	0	0	0	0	0	0	0	0	0	0	0	0	0	0	0	0	0	0	0	0	0	0	0	0	0	0	0.00085883	0	0	0	0.00118143	0	0	0	0	0	0	0	0	0	0.00015331
Curtobacterium_pusillum	0	0	0	0	0	0	0	0	0	0.000127779	0	0	0	0	0	0	0	0	0	0	0	0	0	0	0	0	0	0	0	0	0	0	0	0	0	0	0.00164474	0	0	0	0	0	2.44147e-05	0	0	0	0	0	5.57491e-05
Curvibacter_delicatus	0	0	0	0	0	0.000615536	0.000298775	0	0	0.000255558	0	0	0	0	0	0	0	0	0	0	0	0	0	0	0	0	0	0	0	0.00105857	0	0	0	0	0.000644122	0	0	0	0.000506329	0	0.000924214	0	0.00018311	0	0	0	0	0	0.00015331
Curvularia_papendorfii	0	0	0	0	0	0	0	0	0	0	0	0	0	0	0	0	0	0	0	0	0	0.000112549	0	0	0	0	0	0	0	0	0	0	0	0	0	0	0	0	0	0	0	0	0	0	0	0	0	0	0
Cutaneotrichosporon_curvatum	0	0	0	0	0	0.000492429	0	0	0	0.00351393	0	0	0	0	0	0	0.00107991	0	0	8.60359e-06	0	0	0	0	0	0	0	0	0.000269309	0.00105857	0	0	0	0	0.000644122	0	0	0	0.000506329	0	0	0	0	0	0.016129	0	0	0	0
Cutaneotrichosporon_cyanovorans	0	0	0	0	0	0	0	0	0	0	0	0	0	1.95191e-05	0	0	0	0	0	0	0	0	0	0	0	0	0	0	0	0	0	0	0	0	0	0	0	0	0	0	0	0	0	0	0	0	0	0	0
Cutaneotrichosporon_dermatis	0	0	0	0	0	0	0	0	0	0	0	0	0	0	0	0	0	0	0	0	0	0	0	0	0	0	0	0	0	0	0	0	0	0	0	0	0	0	0	0	0	0	0	0	0	0	0	0	0
Cutibacterium_avidum	0	0	0.00299401	0	0	0	0.000448163	0	0	0.0012139	0.000260451	0	0	0	0	2.6588e-05	0.00107991	0	0	1.29054e-05	0	0.000112549	0	0	0	0	0.000134066	0	0	0	2.43635e-05	3.56043e-05	0	0	0.00107354	0.00300752	0	0	0.000506329	0.00011422	0	0	4.88293e-05	0.000332978	0	1.47859e-05	0	0	0.000111498
Cutibacterium_granulosum	0	0	0.00299401	0	0.000178031	0.00123107	0.000448163	0	0	0	0.000130225	0	0	0.000195191	0	0	0.00107991	0	0	0	0	0.000112549	0	0	0	0	0	0	0	0	0.000365453	3.56043e-05	0	0	0.00203972	0	0	0	0	0	0	0	6.10366e-05	0	0	0	0	0	0.00119861
Cyanobium_gracile	0	0	0	0	0	0	0	0	0	0.000127779	0	0	0	0	0	0	0	0	0	0	0	0	0	0	0	0	0	0	0	0	0	0	0	0	0	0	0	0	0	0	0	0	0	0	0	0	0	0	0
Cyberlindnera_jadinii	0	0	0	0	0	0	0	0	0	0	0	0	0	0	0	0	0	0	0	0	0	0	0	0	0	0	0	0	0	0	0	0	0	0	0	0	0	0	0	0	0	0	0	0	0	0	0	0	0
Cylindrospermopsis_raciborskii	0	0	0	0	0	0	0	0	0	0	0	0	0	0	0	0	0	0	0	0	0	0	0	0	0	0	0	0	0	0	0	0	0	0	0	0	0	0	0	0	0	0	0	0	0	0	0	0	0
Cylindrospermum_stagnale	0	0	0	0	0	0.000246214	0	0	0	0	0	0	0	0	0	0	0	0	0	0	0	0	0	0	0	0	0	0	0	0	0	0	0	0	0	0	0	0	0	0	0	0	0	0	0	0	0	0	0
Cyphellophora_europaea	0.00118906	0	0	0	0	0	0	0	0	0	0	0	0	0	0	0	0	0	0	0	0	0	0	0	0	0	0	0	0	0	0	0	0	0	0	0	0	0	0	0	0	0	0	0	0	0	0	0	5.57491e-05
Cystobacter_fuscus	0	0	0	0	0	0	0	0	0	0	0	0	0	0	0	0	0	0	0	0	0	0	0	0	0	0	0	0	0	0	0	0	0	0	0	0	0	0	0	0	0	0	0	0	0	0	0	0	0
Cytophaga_hutchinsonii	0	0	0	0	0	0.000246214	0	0	0	0.000127779	0	0	0	0	0	0	0	0	0	0	0	0	0	0	0	0	0	0	0	0.000705716	2.43635e-05	3.56043e-05	0	0	0.000214707	0	0	0	0.000337553	0	0	0	0	0	0	0	0	0	0
Debaryomyces_fabryi	0	0	0	0	0	0	0	0	0	0	0	0	0	0	0	0	0	0	0	0	0	0	0	0	0	0	0	0	0	0	0	0	0	0	0	0	0	0	0	0	0	0	0	0	0	0	0	0	0
Debaryomyces_hansenii	0.00356718	0	0	0	0.000178031	0.000246214	0.000448163	0	0	0	0	0	0	0	0	0	0	0	0	0	0	0	0	0	0	0	0	0	0	0.00105857	3.65453e-05	0	0	0	0	0	0	0	0	0	0	0	6.10366e-05	0	0	0	0	0	0
Debaryomyces_nepalensis	0	0	0	0	0	0	0	0	0	0	0	0	0	0	0	0	0	0	0	0	0	0	0	0	0	0	0	0	0	0.00105857	0	0	0	0	0	0	0	0	0	0	0	0	0	0	0	0	0	0	5.57491e-05
Dechloromonas_agitata	0	0	0	0	0	0.000492429	0	0	0	0.00134168	0	0	0	0	0	0	0	0	0	0	0.00104712	0	0	0	0	0	0	0	0	0	0	0	0	0	0.000214707	0	0	0	0	0	0	0	0	0	0	0	0	0	5.57491e-05
Dechloromonas_aromatica	0	0	0.00299401	0	0	0.000246214	0.000298775	0	0	0	0	0	0	0	0	0	0	0	0	0	0	0	0	0	0	0	0	0	0	0.00176429	0	0	0	0	0.000214707	0	0	0	0	0	0	0	0	0	0	0	0	0	0.000111498
Deefgea_rivuli	0	0	0	0	0	0	0	0	0	0	0	0	0	0	0	0	0	0	0	0	0	0	0	0	0	0	0	0	0	0.00105857	0	0	0	0	0	0	0	0	0	0	0	0	0	0	0	0	0	0	5.57491e-05
Deferrisoma_camini	0	0	0	0	0	0	0	0	0	0	0	0	0	0	0	0	0	0	0	0	0	0	0	0	0	0	0	0	0	0	0	0	0	0	0	0	0	0	0	0	0	0	0	0	0	0	0	0	0
Defluviimonas_alba	0	0	0	0	0	0	0	0	0	0	0	0	0	0	0	0	0	0	0	4.3018e-06	0	0	0	0	0	0	0	0	0	0	0	0	0	0	0	0	0	0	0.000337553	0	0	0	0	0	0	0	0	0	0
Defluviitoga_tunisiensis	0	0	0	0	0	0	0	0	0	0	0	0	0	0	0	0	0	0	0	0	0	0	0	0	0	0	0	0	0	0	0	0	0	0	0	0	0	0	0	0	0	0	0	0	0	0	0	0	0
Dehalobacterium_formicoaceticum	0	0	0	0	0.000178031	0	0	0	0	0.000127779	0	0	0	0	0	0	0	0	0	0	0	0	0	0	0	0	0	0	0	0	0	0	0	0	0	0	0	0	0.000337553	0	0	0	0	0	0	0	0	0	0
Deinococcus_apachensis	0	0	0	0	0	0	0	0	0	0.000127779	0	0	0	0	0	0	0	0	0	0	0	0	0	0	0	0	0	0	0	0.00105857	0	0	0	0	0.000214707	0	0	0	0	0	0	0	0	0	0	0	0	0	0
Deinococcus_deserti	0	0	0	0	0	0	0	0	0	0	0	0	0	0	0	0	0	0	0	0	0	0	0	0	0	0	0	0	0	0	0	0	0	0	0.000214707	0	0	0	0	0	0	0	0	0	0	0	0	0	0
Deinococcus_ficus	0	0	0	0	0	0	0	0	0	0.000127779	0	0	0	0	0	0	0	0	0	0	0	0	0	0	0	0	0	0	0	0	0	0	0	0	0.000214707	0	0	0	0.000337553	0	0	0	0	0	0	0	0	0	5.57491e-05
Deinococcus_geothermalis	0	0	0	0	0	0	0.000298775	0	0	0.000255558	0	0	0	0	0	0	0	0	0	0	0	0	0	0.000884173	0	0.00055991	0	0	0	0	0.000146181	0	0	0	0.00107354	0	0	0.000824063	0.000675105	0	0	0	2.44147e-05	0	0	0	0	0	0
Deinococcus_gobiensis	0	0	0	0	0	0	0	0	0	0.000127779	0	0	0	0	0	0	0	0	0	0	0	0	0	0	0	0	0	0	0	0	2.43635e-05	0	0	0	0.00085883	0	0	0	0.000337553	0	0	0	0	0	0	0	0	0	0
Deinococcus_maricopensis	0	0	0	0	0	0	0	0	0	0	0	0	0	0	0	0	0	0	0	0	0	0	0	0	0	0	0	0	0	0	0	0	0	0	0	0	0	0	0	0	0	0	0	0	0	0	0	0	0
Deinococcus_peraridilitoris	0	0	0	0	0	0	0	0	0	0.000127779	0	0	0	0	0	0	0	0	0	0	0	0	0	0	0	0	0	0	0	0	0	0	0	0	0	0	0	0	0	0	0	0	0	0	0	0	0	0	0
Deinococcus_proteolyticus	0	0	0	0	0	0	0	0	0	0.000127779	0	0	0	0	0	0	0	0	0	0	0	0	0	0	0	0	0	0	0	0	0	0	0	0	0.000214707	0	0	0	0	0	0	0	0	0	0	0	0	0	5.57491e-05
Deinococcus_radiodurans	0	0	0	0	0	0	0	0	0	0.000127779	0	0	0	0	0	0	0	0	0.00546448	0	0	0	0	0	0	0	0	0	0.000107724	0	0	0	0	0	0.000429415	0	0	0	0.000337553	0	0	0	0	0	0	0	0	0	0
Delftia_Cs1	0	0	0	0	0	0	0	0	0	0	0	0	0	0	0	0	0	0	0	0	0	0	0	0	0	0.00055991	0	0	0	0	0	0	0	0	0	0	0	0	0	0	0	0	0	0	0	0	0	0	0
Delftia_acidovorans	0	0	0	0	0	0	0	0	0	0	0	0	0	0	4.2996e-05	1.3294e-05	0	0	0	0	0	0.000112549	0	0	0	0.00055991	0	0	0	0	0	0	0	0	0	0	0	0	0	0	0	0	0	0	0	0	0	0	0.00195122
Delftia_tsuruhatensis	0	0	0	0	0	0.00283147	0.00298775	0	0	0.00479172	0	0	0	1.95191e-05	0	0	0	0	0	0	0	0	0	0	0	0	0	0	0	0	3.65453e-05	3.56043e-05	0.00356102	0	0	0	0	0	0	0	0	0	0	0	0	0	0	0	0.000710801
Denitrobacterium_detoxificans	0	0	0	0	0	0	0	0	0	0	0	0	0	0	0	0	0	0	0	0	0	0	0	0	0	0	0	0	0	0	0	0	0	0	0	0	0	0	0	0	0	0	0	0	0	0	0	0	0
Dermabacter_hominis	0	0	0	0	0	0.000246214	0.000298775	0	0	0.000894454	0	0	0	1.95191e-05	0	2.6588e-05	0	0	0	0	0	0	0	0	0	0	0	0	0.000107724	0	0	0	0	0	0.000214707	0	0	0	0.000337553	0.00011422	0	0	0	0	0	0	0	0	0.000209059
Dermabacter_vaginalis	0	0	0	0	0	0	0	0	0	0.000383338	0	0	0	0	0	0	0	0	0	0	0	0.000112549	0	0	0	0	0	0	0	0	0	0	0	0	0	0	0	0	0	0	0	0	0	0	0	0	0	0	5.57491e-05
Dermacoccus_nishinomiyaensis	0	0.000116259	0	0	0.000178031	0.000246214	0.000746938	0.00548446	0	0.000383338	0	0	0	0	4.2996e-05	0	0	0	0	8.60359e-06	0	0	0	0	0	0	0	0	0	0	0.000475088	0	0.000647459	4.8534e-06	0.000644122	0	0	0	0.000506329	0	0	0	4.88293e-05	0	0	0	0.000554324	0	0
Derxia_gummosa	0	0	0	0	0	0.000246214	0.000298775	0	0	0	0	0	0	0	0	0	0	0	0	0	0	0	0	0	0	0	0	0	0	0	0	0	0	0	0.000214707	0	0	0	0	0	0	0	2.44147e-05	0	0	0	0	0	0.000111498
Desemzia_incerta	0	0	0	0	0	0	0	0.00548446	0	0	0	0	0	0	0	0	0	0	0	0	0	0	0	0	0	0	0	0	0	0.000705716	0	0	0	0	0	0	0	0	0.000337553	0	0	0	0	0	0	1.47859e-05	0	0	0
Desnuesiella_massiliensis	0	0	0	0	0	0	0	0	0	0	0	0	0	0	0	0	0	0	0	0	0	0	0	0	0	0	0	0	0	0	0	0	0	0	0	0	0	0	0.000337553	0	0	0	2.44147e-05	0	0	0	0	0	0
Desulfatiglans_anilini	0	0	0	0	0	0	0	0	0	0	0	0	0	0	0	0	0	0	0	4.3018e-06	0	0	0	0	0	0	0	0	0	0	0	0	0	0	0	0	0	0	0	0	0	0	0	0	0	0	0	0	0
Desulfitobacterium_hafniense	0	0	0	0	0	0.000246214	0	0	0	0	0	0	0	0	0	0	0	0	0	0	0	0	0	0	0	0	0	0	0	0	0	0	0	0	0	0	0	0	0	0	0	0	2.44147e-05	0.000133191	0	0	0	0	0
Desulfocurvus_vexinensis	0	0	0	0	0	0	0	0	0	0	0	0	0	0	0	0	0	0	0	0	0	0	0	0	0	0	0	0	0	0	0	0	0	0	0	0	0	0	0	0	0	0	0	0	0	0	0	0	0
Desulfomicrobium_escambiense	0	0	0	0	0	0	0	0	0	0	0	0	0	0	0	0	0	0	0	0	0	0	0	0	0	0	0	0	0	0	0	0	0	0	0	0	0	0	0.000337553	0	0	0	0	0	0	0	0	0	0
Desulfomicrobium_orale	0	0	0	0	0.000623108	0	0	0	0	0.000511117	0	0	0	0	0	2.6588e-05	0	0	0	0	0	0	0	0	0	0	0	0	0	0	0	0	0	0	0	0	0	0	0	0	0	0	0	0	0	0	0	0	0
Desulfosporosinus_meridiei	0	0	0	0	0	0	0	0	0	0	0	0	0	0	0	0	0	0	0	0	0	0	0	0	0	0	0	0	0	0	0	0	0	0	0	0	0	0	0	0	0	0	0	0	0	1.47859e-05	0	0	0
Desulfotomaculum_aeronauticum	0	0	0	0	0	0	0	0	0	0	0	0	0	0	0	0	0	0	0	0	0	0	0	0	0	0	0	0	0	0	0	0	0	0	0	0	0	0	0	0	0	0	0	0	0.016129	0	0	0	0
Desulfovibrio_fairfieldensis	0	0	0	0	0	0	0	0	0	0	0	0	0	0	0	0	0	0	0	0	0	0	0	0	0	0	0	0	0	0	0	0	0	0	0	0	0	0	0	0	0	0	0	0	0	0.00077626	0	0	0
Desulfovibrio_magneticus	0	0	0	0	0	0	0	0	0	0	0	0	0	0	0	0	0	0	0	0	0	0	0	0	0	0	0	0	0	0	0	0	0	0	0	0	0	0	0	0	0	0	0	0	0	0	0	0	0
Desulfovibrio_piger	0	0	0	0	0	0	0	0	0	0	0	0	0	0	0	0	0	0	0	0	0	0	0	0	0	0	0	0	0	0	2.43635e-05	0	0	0	0	0	0	0	0	0	0	0	0	0	0	0	0	0	0
Desulfovibrio_salexigens	0	0	0	0	0	0	0	0	0	0	0	0	0	0	0	0	0	0	0	0	0	0	0	0	0	0	0	0	0	0	0	0	0	0	0	0	0	0	0	0	0	0	0	0	0	0	0	0	0
Desulfovibrio_vulgaris	0	0	0.00299401	0	0	0	0	0	0	0	0.000130225	0	0	0	0	0	0	0	0	0	0	0	0	0	0	0	0	0	0	0	0	0	0	0	0	0	0	0	0	0	0	0	0	0	0	1.47859e-05	0	0	0
Devosia_chinhatensis	0	0	0	0	0	0	0	0	0	0	0	0	0	0	0	0	0	0	0	0	0	0	0	0	0	0	0	0	0	0	0	0	0	0	0	0	0	0	0.000337553	0	0	0	0	0	0	0	0	0	5.57491e-05
Dialister_invisus	0	0.000116259	0	0	0	0.000246214	0.000298775	0	0	0.000127779	0.000130225	0	0	0	0	2.6588e-05	0	0	0.00546448	0.000477499	0	0	0	0	0	0	0.000134066	0	0	0	0.000706542	8.90107e-05	0	9.94948e-05	0.000214707	0	0	0	0	0.00274129	0	0	2.44147e-05	0	0	0	0	0	0.00015331
Dialister_micraerophilus	0	0	0	0	0	0	0	0	0	0	0	0	0	1.95191e-05	0	0	0	0	0	0	0	0	0	0	0	0	0	0	0	0	0	8.90107e-05	0	0	0	0	0	0	0	0	0	0	0	0	0	0	0	0	0
Dialister_pneumosintes	0	0	0	0	0.000178031	0	0	0	0	0	0.000130225	0	0	0	0	0.000159528	0	0	0	4.73198e-05	0	0	0	0	0	0	0	0	0	0	0	0	0	3.64005e-05	0	0	0	0	0.00202532	0	0	0	2.44147e-05	0	0	0	0	0	0
Diaphorobacter_polyhydroxybutyrativorans	0	0	0	0	0	0.000246214	0.000448163	0.00548446	0	0.00159724	0	0	0	0	0	0	0.00107991	0	0	0	0.0293194	0	0	0	0	0	0	0	0	0	0	0	0	0	0.00107354	0	0	0	0.000675105	0	0	0	2.44147e-05	0.000133191	0	1.47859e-05	0	0	5.57491e-05
Diaporthe_ampelina	0	0	0	0	0	0	0	0	0	0	0	0	0	0	0	0	0	0	0	0	0	0	0	0	0	0	0	0	0	0	0	0	0.000647459	0	0	0	0	0	0	0	0	0	0	0	0	0	0	0	0
Diaporthe_helianthi	0	0	0	0	0	0	0	0	0	0	0	0	0	0	0	0	0	0	0	0	0	0	0	0	0	0	0	0	0	0	0	3.56043e-05	0	0	0	0	0	0	0	0	0	0	0	0	0	0	0	0	0
Dichelobacter_nodosus	0	0	0	0	0	0	0	0	0	0.000127779	0	0	0	0	0	0	0	0	0	0	0.00104712	0	0	0	0	0	0	0	0	0	0	0	0	0	0	0	0	0	0	0	0	0	0	0	0	0	0	0	0
Dickeya_paradisiaca	0	0	0	0	0	0	0	0	0	0	0	0	0	0	0	0	0	0	0	0	0	0	0	0	0	0	0	0	0	0	0	0	0	0	0	0	0	0	0	0	0	0	0	0	0	0	0	0	0
Dickeya_solani	0	0	0	0	0	0	0	0	0	0	0	0	0	0	0	0	0	0	0	0	0	0	0	0	0	0	0	0	0	0	0	0	0	0	0	0	0	0	0	0	0	0	0	0	0	0	0	0	0
Dickeya_zeae	0	0	0	0	0	0	0	0	0	0	0	0	0	0	4.2996e-05	0	0	0	0	0	0	0	0	0	0	0	0	0	0	0	0	0	0	0	0	0	0	0	0	0	0	0	0	0	0	0	0	0	0
Dietzia_cinnamea	0	0	0	0	0	0.000246214	0	0	0	0	0	0	0	0	0	0	0	0	0	0	0	0.000112549	0	0	0	0	0	0	0	0	0	0	0	0	0.000214707	0	0	0	0.000337553	0	0	0	0	0	0	0	0	0	0
Dietzia_maris	0	0	0	0	0	0	0	0	0.00276625	0	0	0	0	0	0	0	0	0	0	0	0	0	0	0	0	0	0	0	0	0	0	0	0	0	0	0	0	0	0.000506329	0	0	0	2.44147e-05	0	0	0	0	0	0
Dietzia_natronolimnaea	0	0	0	0	0	0.000492429	0.000298775	0	0	0.000255558	0	0	0	0	0	0	0	0	0	0	0	0	0	0	0	0	0	0	0	0	2.43635e-05	0	0	0	0	0.00300752	0	0	0.000506329	0	0	0	4.88293e-05	0	0	0	0	0	0.000111498
Dinoroseobacter_shibae	0	0	0	0	0	0	0	0	0	0	0	0	0	0	0	0	0	0	0	0	0	0	0	0	0	0	0	0	0	0	0	0	0	0	0	0	0	0	0	0	0	0	0	0	0	0	0	0	0
Dokdonella_immobilis	0	0	0	0	0	0	0	0	0	0.000127779	0	0	0	0	0	0	0	0	0	0	0	0	0	0	0	0	0	0	0	0	0	0	0	0	0	0	0	0	0	0	0	0	0	0	0	0	0	0	0
Dolichospermum_circinale	0	0	0	0	0	0	0	0	0	0	0	0	0	0	0	0	0	0	0	0	0	0	0	0	0	0	0	0	0	0	0	0	0	0	0	0	0	0	0	0	0	0	0	0	0	0	0	0	0
Dolosicoccus_paucivorans	0	0	0	0	0.000178031	0	0	0	0	0.000127779	0	0	0	0	0	0	0	0	0	0	0	0	0	0	0	0	0	0	0	0	0	0	0	7.2801e-06	0	0	0	0	0	0	0	0	0	0	0	0	0	0	0
Dolosigranulum_pigrum	0	0	0	0	0	0	0	0	0	0	0	0	0	0	0	2.6588e-05	0	0	0	0.0064656	0	0	0	0	0	0	0	2.30309e-05	0.000215448	0.00599859	2.43635e-05	0	0	7.2801e-06	0.00472356	0	0	0	0	0.000228441	0	0	4.88293e-05	0	0	0	0	0	0.000111498
Donghicola_eburneus	0	0	0	0	0	0	0	0	0	0	0	0	0	0	0	0	0	0	0	0	0	0	0	0	0	0	0	0	0	0	0	0	0	0	0	0	0	0	0	0	0	0	0	0	0	0	0	0	0
Dorea_formicigenerans	0	0	0	0	0	0	0	0	0	0.000383338	0	0	0	0	0	0	0	0	0	4.3018e-06	0	0	0	0	0	0	0	0	0	0	0	0	0	0	0	0	0	0	0.000337553	0	0	0	4.88293e-05	0	0	0	0	0	0
Dorea_longicatena	0	0	0	0	0	0.000615536	0.00059755	0	0	0	0	0	0	0	0	0	0	0	0	8.60359e-06	0	0	0	0	0	0	0	0	0	0	0	0	0	0	0	0	0	0	0	0	0	0	0	0	0	0	0	0	5.57491e-05
Dracunculus_medinensis	0	0	0	0	0	0	0	0	0	0	0	0	0	0	0	0	0	0	0	0	0	0	0	0	0	0	0	0	0	0	0	0	0	0	0	0	0	0	0	0	0	0	0	0	0	0	0	0	0
Duganella_sacchari	0	0	0	0	0	0.000246214	0	0	0	0	0	0	0	0	0	0	0	0	0	0	0	0	0	0	0	0	0	0	0	0.000705716	0	0	0	0	0	0.00300752	0	0	0.00101266	0	0	0	2.44147e-05	0	0	1.47859e-05	0	0	0.000250871
Duodenibacillus_massiliensis	0	0	0	0	0	0	0	0	0	0.000127779	0	0	0	0	0	0	0	0	0	0	0	0	0	0	0	0	0	0	0	0	0	0	0	0	0	0	0	0	0	0	0	0	0	0	0	0	0	0	0.000111498
Dyadobacter_fermentans	0	0	0	0	0	0	0	0	0	0	0	0	0	0	0	0	0	0	0	0	0	0	0	0	0	0	0	0	0	0	0	0	0	0	0.000214707	0	0	0	0.000506329	0	0	0	0	0	0	0	0	0	0
Dyella_japonica	0	0	0	0.0168067	0.000267046	0.000246214	0.000298775	0	0	0.000511117	0	0	0	0	0	0	0	0	0	0	0	0	0	0	0	0	0	0	0	0.0112915	0	0	0	0	0.000644122	0	0	0	0	0	0	0	6.10366e-05	0	0	0	0	0	0.00015331
Dysgonomonas_capnocytophagoides	0	0	0	0	0	0.000246214	0	0	0	0.000127779	0.000130225	0	0	0	0	0	0	0	0	0	0	0	0	0	0	0	0	0	0	0	0	0	0	0	0	0	0	0	0	0	0	0	0	0	0	0	0	0	0
Dysgonomonas_gadei	0	0	0	0	0	0	0.000896325	0	0	0	0	0	0	0	0	0	0	0	0	0	0.00314136	0	0	0	0	0	0	0	0	0	0	0	0	0	0	0	0	0	0	0	0	0	0	0	0	0	0	0	0.000362369
Dysgonomonas_hofstadii	0	0	0	0	0	0.000246214	0	0	0	0.000255558	0.000260451	0	0	0	0	0	0	0	0	0	0	0	0	0	0	0	0	0	0	0	0	0	0	0	0	0	0	0	0	0	0	0	0	0	0.0241935	0	0	0	0
Dysgonomonas_mossii	0	0	0	0	0	0	0	0	0	0.00230003	0	0	0	0	0	0	0.00107991	0	0	0	0	0	0	0	0	0	0	0	0	0	0	0	0	0	0	0	0	0	0	0	0	0	0	0	0	0	0	0	0
Echinicola_vietnamensis	0	0	0	0	0	0	0	0	0	0	0	0	0	0	0	0	0	0	0	0	0	0	0	0	0	0	0	0	0	0	0	0	0	0	0	0	0	0	0	0	0	0	0	0	0	0	0	0	0
Ectothiorhodospira_haloalkaliphila	0	0	0	0	0	0	0	0	0	0	0	0	0	0	0	0	0	0	0	0	0.00104712	0	0	0	0	0	0	0	0	0	0	0	0	0	0	0	0	0	0	0	0	0	0	0	0	0	0	0	0
Edaphobacter_aggregans	0	0	0	0	0	0	0	0	0	0	0	0	0	0	0	0	0	0	0	0	0	0	0	0	0	0	0	0	0	0.00176429	2.43635e-05	0	0	0	0	0	0	0	0	0	0	0	0	0	0	0	0	0	5.57491e-05
Edwardsiella_tarda	0	0	0	0	0	0	0	0	0	0	0	0	0	0	0	0	0	0	0	0	0	0	0	0	0	0	0	0	0	0	0	0	0	0	0	0	0	0	0	0	0	0	0	0	0	0	0	0	0
Eggerthella_lenta	0	0	0	0	0	0	0	0	0	0.000127779	0	0	0	0	0	1.3294e-05	0	0	0	4.3018e-06	0	0	0	0	0	0	0	0	0	0	0	0	0	0	0	0	0	0	0	0.00011422	0	0	2.44147e-05	0	0	0	0	0	5.57491e-05
Eggerthia_catenaformis	0	0	0	0	0.000356062	0	0	0	0	0	0.000130225	0	0	0	0	7.97639e-05	0	0	0	2.1509e-05	0	0	0	0	0	0	0.000268132	0	0	0	2.43635e-05	5.34064e-05	0	4.8534e-06	0	0	0	0	0	0	0	0	2.44147e-05	0	0	0	0	0	0
Eikenella_corrodens	0.00237812	0	0	0	0	0	0.000448163	0	0	0	0.000651126	0	0	0	0	0.000664699	0.00107991	0	0	4.3018e-06	0	0	0	0	0	0	0	5.75772e-05	0	0.000705716	9.7454e-05	3.56043e-05	0.00258983	0.00116724	0	0	0	0	0.00151899	0.000913764	0	0	2.44147e-05	0	0	0.00012568	0	0	0.000111498
Eimeria_tenella	0.00118906	0	0	0.0336134	0	0	0.000298775	0	0	0	0	0	1.68101e-05	0	4.2996e-05	1.3294e-05	0	0	0	0	0	0.000112549	0	0	0	0	0	0	0	0	2.43635e-05	0	0	0	0	0	0	0	0	0.000228441	0	0.0118577	0	0.000133191	0	2.95718e-05	0	0	0
Eisenbergiella_tayi	0	0	0	0	0	0	0	0	0	0	0	0	0	0	0	0	0	0	0	0	0	0	0	0	0	0	0	0	0	0	0	0	0	0	0	0	0	0	0	0	0	0	0	0	0	0	0	0	0
Elioraea_tepidiphila	0	0	0	0	0	0	0.000298775	0	0	0.000127779	0	0	0	0	0	0	0	0	0	0	0	0	0	0	0	0	0	0	0	0	0	0	0	0	0	0	0	0	0.000337553	0	0	0	0	0	0	0	0.000554324	0	0
Elizabethkingia_anophelis	0	0	0	0	0	0	0.000298775	0	0	0.000383338	0	0	0	0	0	0	0	0	0	0	0.00104712	0	0	0	0	0	0	0	0	0	0	3.56043e-05	0	0	0.000214707	0	0	0	0	0	0	0	0	0	0	0	0	0.0459263	0
Elizabethkingia_meningoseptica	0	0	0	0	0	0	0	0	0	0	0	0	0	0	0	0	0	0	0	0	0	0	0	0	0	0	0	0	0	0	0	0	0	0	0	0	0	0	0	0	0	0	0	0	0	0	0	0	0
Elizabethkingia_miricola	0	0	0	0	0	0	0	0	0	0	0	0	0	0	0	0	0	0	0	0	0.00418848	0	0	0	0	0	0	0	0	0	0	0	0	0	0.000429415	0	0	0	0.000337553	0	0	0.0118577	0	0	0	0	0	0.00363259	0
Elusimicrobium_minutum	0	0	0	0	0	0	0	0	0	0	0	0	0	0	0	0	0	0	0	0	0	0	0	0	0	0	0	0	0	0	0	0	0	4.8534e-06	0	0	0	0	0	0	0	0	0	0	0	0	0	0	0
Emergencia_timonensis	0	0	0	0	0	0	0	0	0	0	0	0	0	0	0	0	0	0	0	0	0	0	0	0	0	0	0	0	0	0	0	0	0	0	0	0	0	0	0	0	0	0	0	0	0	0	0	0	0
Empedobacter_brevis	0	0	0	0	0	0	0	0	0	0	0	0	0	0	0	0	0	0	0	0	0.00104712	0	0	0	0	0	0	0	0	0	0	0	0	0	0	0	0	0	0	0	0	0	0	0	0	0	0	0	0
Empedobacter_falsenii	0	0	0	0	0	0.000492429	0	0	0	0	0	0	0	1.95191e-05	0	0	0	0	0	0	0.00104712	0	0	0	0	0	0	0	0	0	2.43635e-05	3.56043e-05	0	0	0	0	0	0	0.000506329	0	0	0	0	0	0	0	0	0	0.000111498
Emticicia_oligotrophica	0	0	0	0	0	0	0	0	0	0	0	0	0	0	0	0	0	0	0	0	0	0	0	0	0	0	0	0	0	0.000705716	0	0	0	0	0	0	0	0	0	0	0	0	0	0	0	0	0	0	0
Enhydrobacter_aerosaccus	0	0	0	0	0	0.000246214	0	0	0	0.000127779	0	0	0	0	0	0	0	0	0	0	0	0	0	0	0	0	0	0	0.000107724	0.00564573	0	0	0	0	0.000429415	0	0	0	0	0	0	0	0	0	0	0	0	0	0.000209059
Enorma_massiliensis	0	0	0	0	0	0	0	0	0	0	0	0	0	0	0	0	0	0	0	0	0	0	0	0	0	0	0	0	0	0	0	0	0	0	0	0	0	0	0	0	0	0	0	0	0	0	0	0	0
Ensifer_adhaerens	0	0	0.00748503	0	0	0.000246214	0	0	0	0.000127779	0	0	0	0	0	0	0	0	0	0	0	0	0	0	0	0	0	0	0	0	0	8.90107e-05	0	0	0.0247987	0	0	0	0	0	0	0	0	0	0.016129	0	0	0	5.57491e-05
Entamoeba_dispar	0.00118906	0	0	0.0168067	0	0	0	0	0	0	0	0	0	0	0	0	0	0	0	0	0	0	0	0	0	0	0	0	0	0	0	0	0	0	0	0	0	0	0	0	0	0	0	0	0.016129	0	0	0	0
Entamoeba_invadens	0	0	0	0	0	0	0	0	0	0.000127779	0	0	0	0	0	0	0	0	0	0	0	0	0	0	0	0	0	0	0	0	0	0	0	0	0	0	0	0	0	0	0	0	0	0	0	0	0	0	0
Enteractinococcus_helveticum	0	0	0	0	0	0	0	0	0	0.000127779	0	0	0	0	0	0	0	0	0	0	0	0	0	0	0	0	0	0	0	0	0	0	0	0	0	0	0	0	0	0	0	0	0	0	0	0	0	0	0
Enterobacter_asburiae	0.00118906	0	0.00299401	0	0	0	0	0	0	0	0	0	0	0	0	0	0	0	0	8.60359e-06	0	0	0	0	0	0.00111982	0	0	0	0.00105857	2.43635e-05	0	0	0	0.000644122	0	0	0	0	0	0	0	0	0.000133191	0	0	0.000554324	0	5.57491e-05
Enterobacter_cancerogenus	0	0	0	0	0	0	0	0	0	0	0	0	0	1.95191e-05	0	0	0	0	0	0	0.00104712	0	0	0	0	0	0	0	0	0	0	0	0	0	0	0	0	0	0	0	0	0	0	0	0	0	0	0	0
Enterobacter_cloacae	0	0	0	0	0	0	0	0	0	0	0	0	0	0	0	0	0	0	0	0	0.00104712	0	0	0	0	0	0	0	0	0	0	0	0	0	0	0	0	0	0	0	0	0	0	0	0	0	0	0	0
Enterobacter_hormaechei	0	0	0	0	0.000178031	0	0.000298775	0	0	0.000127779	0	0	0	0	0	0	0	0	0	0	0.00209424	0	0	0	0	0	0	0	0	0.000705716	0	0	0	0	0.000214707	0	0	0	0	0	0	0	2.44147e-05	0	0	0	0	0	0
Enterobacter_kobei	0	0	0	0	0	0	0	0	0	0	0	0	0	3.90381e-05	4.2996e-05	1.3294e-05	0	0	0	2.1509e-05	0	0	0	0	0	0	0	0	0	0	0.00973322	0	0	0	0	0	0	0	0	0	0.000924214	0	0	0	0	1.47859e-05	0.000554324	0	0
Enterobacter_lignolyticus	0	0	0	0	0	0	0	0	0	0	0	0	0	0	0	0	0	0	0	0	0	0	0	0	0	0	0	0	0	0	0	0	0	0	0	0	0	0	0	0	0	0	0	0	0	0	0	0	0
Enterobacter_ludwigii	0	0	0	0	0	0	0	0	0	0.000127779	0	0	0	0	0	0	0	0	0	0	0	0	0	0	0	0	0	0	0	0	0	0	0	4.8534e-06	0	0	0	0	0.000337553	0	0	0	0	0	0	0	0	0	0
Enterobacter_xiangfangensis	0	0	0	0	0	0	0	0	0	0	0	0	0	0	0	0	0	0	0	0	0	0	0	0	0	0	0	0	0	0	0	0	0	0	0	0	0	0	0	0	0	0	0	0	0	0	0	0	0
Enterobacteriaceae_bacterium	0	0	0	0	0	0	0	0	0	0	0	0	0	0	0	0	0	0	0	0	0	0	0	0	0	0	0	0	0	0	0	0	0	0	0	0	0	0	0	0	0	0	0	0	0	0	0	0	0
Enterobacteriaceae_bacterium_9_2_54FAA	0	0	0	0	0	0	0.000298775	0	0	0	0	0	0	0	0	0	0	0	0	0	0	0	0	0	0	0	0	0	0	0.000705716	0	0	0	0	0.000214707	0	0.00164474	0	0.000675105	0.00011422	0	0	2.44147e-05	0	0	1.47859e-05	0.000554324	0	5.57491e-05
Enterococcus_asini	0	0	0	0	0	0.000615536	0	0	0	0	0	0	0	0	0	0	0	0	0	0	0	0	0	0	0	0	0	0	0	0	0	0	0	0.000225683	0	0	0	0	0	0	0	0	4.88293e-05	0	0	0	0	0	0
Enterococcus_avium	0.0059453	0	0	0	0.0034716	0.000246214	0.00164326	0	0	0	0	0	0	0	0	0	0	0	0	0	0.00732984	0	0	0	0	0	0	0	0	0	0	0	0	9.70681e-06	0	0	0	0.0065925	0	0	0	0	0.000439464	0	0	0	0	0	5.57491e-05
Enterococcus_canis	0	0	0	0	0	0	0	0	0	0	0	0	0	0	0	1.3294e-05	0	0	0	0	0	0	0	0	0	0	0	0	0	0	0	0	0	0	0	0	0	0	0	0	0	0	2.44147e-05	0	0	0	0	0	0
Enterococcus_casseliflavus	0	0.000116259	0	0	0.000267046	0	0.000746938	0	0	0	0	0	0	3.90381e-05	0	0	0.00107991	0	0	0	0.0450262	0	0	0	0	0	0	0	0	0.000705716	0	0	0	0	0	0	0	0	0.00118143	0	0	0	0.00054933	0	0	0	0	0	5.57491e-05
Enterococcus_cecorum	0	0.000116259	0	0	0.000356062	0.00135418	0.00134449	0	0	0.000638896	0	0	0	1.95191e-05	0	0	0	0	0	4.3018e-06	0	0	0	0	0	0	0	2.87886e-05	0	0	0.000328907	0	0	9.70681e-05	0.00107354	0	0	0	0.000675105	0	0	0	0.000646988	0	0	0	0	0	0.00015331
Enterococcus_columbae	0	0	0	0	0	0	0	0	0	0	0	0	0	0	0	0	0	0	0	0	0	0	0	0	0	0	0	0	0	0	0	0	0	4.8534e-06	0	0	0	0	0	0	0	0	0	0	0	0	0	0	0
Enterococcus_dispar	0	0	0	0	0.00133523	0	0.000298775	0	0	0	0	0	0	0	0	0	0	0	0	4.3018e-06	0	0	0	0	0	0.00055991	0	0	0	0	0	0	0	0	0	0	0	0	0	0	0	0	0.000280769	0	0	0	0	0	5.57491e-05
Enterococcus_durans	0	0	0	0	0.000534093	0.000861751	0.00059755	0	0	0	0	0	0	0	0	0	0	0	0	0	0	0	0	0	0	0.00055991	0	0	0	0	0	0	0	0	0	0	0	0	0.00118143	0	0	0	0.000244147	0.000466169	0	0	0	0	0.000111498
Enterococcus_faecalis	0.00237812	0	0	0	0.00427274	0	0	0	0	0	0	0	0	0	0.00859919	0	0	0	0	0	0	0	0	0	0	0.00055991	0	0	0	0.00105857	0	0	0	7.2801e-06	0	0	0	0	0	0	0	0	0	0	0	0	0	0	0.00210453
Enterococcus_faecium	0.0903686	0	0	0	0	0.00455497	0.00179265	0	0.00276625	0	0	0	0	0.000663648	0.00412761	0	0	0	0	0	0	0.000112549	0	0	0	0.302912	0	0	0	0	0	0.0471223	0	0	0.000429415	0	0	0.700453	0.215527	0	0	0	0.00146488	0.0422216	0	0	0	0.00804359	0.000209059
Enterococcus_gallinarum	0	0	0	0	0.000267046	0.000615536	0.000298775	0	0	0	0	0	0	0	0	0	0	0	0	4.3018e-06	0.0115183	0	0	0	0	0	0	0	0	0.00105857	0	0	0	0	0.00085883	0	0	0	0.000337553	0	0	0	8.54513e-05	0	0	0	0	0	0.000209059
Enterococcus_gilvus	0	0	0	0	0.000712124	0.000492429	0.00179265	0	0	0	0	0	0	0	0	0	0	0	0	0	0	0	0	0	0	0	0	0	0	0	0	0	0	0	0	0	0	0	0	0	0	0	0.000415049	0	0	0	0	0	0
Enterococcus_hirae	0	0	0	0	0	0	0	0	0	0	0	0	0	0	0	0	0	0	0	0	0	0	0	0	0	0.00055991	0	0	0	0	0	0	0.000647459	0	0	0	0	0	0.00371308	0	0	0	0	0	0	0	0	0	0
Enterococcus_italicus	0	0	0	0	0	0.000246214	0.000448163	0	0	0	0	0	0	0	0	0	0	0	0	0	0	0	0	0	0	0	0	0	0	0	0	0	0	0	0	0	0	0	0	0	0	0	0.000146488	0	0	0	0	0	5.57491e-05
Enterococcus_malodoratus	0	0	0	0	0.000356062	0.000246214	0.000448163	0	0	0	0	0	0	0	0	0	0	0	0	0	0	0	0	0	0	0.00055991	0	0	0	0	0	0	0	0	0	0	0	0	0	0	0	0	0.000354013	0	0	0	0	0	0.000111498
Enterococcus_mundtii	0	0	0	0	0.000712124	0	0.00059755	0	0	0	0	0	0	0	0	0	0	0	0	0	0	0	0	0	0	0	0	0	0	0	0	0	0	0	0	0	0	0	0	0	0	0	4.88293e-05	0	0	0	0	0	0
Enterococcus_pallens	0	0	0	0	0.000178031	0	0	0	0	0	0	0	0	0	0	0	0	0	0	0	0	0	0	0	0	0	0	0	0	0	0	0	0	0	0	0	0	0	0	0	0	0	0	0	0	0	0	0	0
Enterococcus_pseudoavium	0	0	0	0	0.0210967	0.00750954	0.00971019	0	0	0	0	0	0	0	0	0	0	0	0	0	0	0	0	0	0	0	0	0	0	0	0	0	0	0	0	0	0	0	0	0	0	0	0.0058229	0	0	0	0	0	0.000905923
Enterococcus_raffinosus	0	0	0	0	0	0	0	0	0	0	0	0	0	0	0	0	0	0	0	0	0	0	0	0	0	0	0	0	0	0	0	0	0	0	0	0	0	0	0	0	0	0	2.44147e-05	0	0	0	0	0	0
Enterococcus_saccharolyticus	0	0	0	0	0.000178031	0	0.000298775	0	0	0	0	0	0	0	0	0	0	0	0	8.60359e-06	0	0	0	0	0	0	0	0	0	0	0	0	0	0	0	0	0	0	0	0	0	0	4.88293e-05	0	0	0	0	0	0
Enterococcus_sulfureus	0	0	0	0	0	0	0	0	0	0	0	0	0	0	0	0	0	0	0	0	0	0	0	0	0	0	0	0	0	0	0	0	0	0	0	0	0	0	0	0	0	0	2.44147e-05	0	0	0	0	0	0
Enterococcus_thailandicus	0	0	0	0	0.00097917	0.00283147	0.0047804	0	0	0	0	0	0	0	0	0	0	0	0	0	0	0	0	0	0	0	0	0	0	0	0	0	0	0	0	0	0	0	0	0	0	0	0.00230719	0	0	0	0	0	0.000905923
Enterocytozoon_bieneusi	0	0	0	0	0	0	0	0	0	0	0	0	0	0	0	0	0	0	0	0	0	0	0	0	0	0	0	0	0	0	2.43635e-05	0	0	0	0	0	0	0	0	0	0	0	0	0	0	0	0	0	0
Erwinia_amylovora	0	0	0	0	0	0	0	0	0	0	0	0	0	0	0	0	0	0	0	0	0	0	0	0	0	0	0	0	0	0	0	0	0	0	0	0	0	0	0.000337553	0	0	0	0	0	0	0	0	0	0
Erwinia_billingiae	0	0	0	0	0	0.00123107	0.000298775	0	0	0.000255558	0	0	0	0	0	1.3294e-05	0	0	0	0	0	0	0	0	0	0	0	1.15154e-05	0	0	0	0	0	0	0	0	0	0	0	0	0	0	2.44147e-05	0	0	0	0	0	0.000250871
Erwinia_iniecta	0	0	0	0	0	0	0	0	0	0	0	0	0	0	0	0	0	0	0	0	0	0	0	0	0	0	0	0	0	0	0	0	0	0	0	0	0	0	0	0	0	0	0	0	0	0	0	0	0
Erwinia_mallotivora	0	0	0	0	0	0	0	0	0	0	0	0	0	0	0	0	0	0	0	0	0	0	0	0	0	0	0	0	0	0	0	0	0	0	0	0	0	0	0	0	0	0	0	0	0	0	0	0	0
Erwinia_pyrifoliae	0	0	0	0	0	0	0	0	0	0	0	0	0	0	0	0	0	0	0	0	0	0	0	0	0	0	0	0	0	0	0	0	0	0	0	0	0	0	0	0	0	0	0	0	0	0	0	0	0
Erwinia_tasmaniensis	0	0	0	0	0	0	0	0	0	0	0	0	0	0	0	0	0	0	0	0	0	0	0	0	0	0	0	0	0	0	0	0	0	0	0	0	0	0	0	0	0	0	0	0	0	0	0	0	0
Erysipelatoclostridium_ramosum	0	0	0	0	0	0	0	0	0	0	0	0	0	0	0	0	0	0	0	0	0	0	0	0	0	0	0	0	0	0	0	0	0	0	0	0	0	0	0.000337553	0	0	0	0	0	0	0	0	0	0
Erysipelothrix_rhusiopathiae	0	0	0	0	0	0	0.000746938	0	0	0	0	0	0	0	0	0	0	0	0	0	0	0	0	0	0	0	0	0	0	0	0	0	0	0	0	0	0	0	0	0	0	0	0	0	0	0	0	0	0
Erysipelotrichaceae_bacterium_5_2_54FAA	0	0	0	0	0	0	0	0	0	0	0	0	0	0	0	0	0	0	0	0	0	0	0	0	0	0	0	0	0	0	0	0	0	0	0	0	0	0	0	0	0	0	0	0	0	0	0	0	0
Erythrobacter_flavus	0	0	0	0	0	0	0	0	0	0	0	0	0	0	0	0	0	0	0	0	0	0	0	0	0	0	0	0	0	0	0	0	0	0	0	0	0	0	0.000337553	0	0	0	0	0	0	0	0	0	0
Erythrobacter_litoralis	0	0	0.00299401	0	0	0	0.000298775	0	0	0	0	0	0	0	0	0	0	0	0	0	0	0	0	0	0	0	0	0	0	0	0	0	0	0	0	0	0	0	0.000337553	0	0	0	0	0	0	0	0	0	0.000111498
Erythrobacter_vulgaris	0	0	0	0	0	0	0	0	0	0	0	0	0	0	0	0	0	0	0	0	0	0	0	0	0	0	0	0	0.000107724	0	0	0	0	0	0	0	0	0	0	0	0	0	0	0	0	0	0	0	5.57491e-05
Escherichia_albertii	0	0	0	0	0	0	0	0	0	0	0	0	0	0	0	0	0	0	0	0	0	0	0	0	0	0.00223964	0	0	0	0	0	0	0	0	0	0	0	0	0	0	0	0	0	0	0	0	0	0	0
Escherichia_coli	0	0	0	0	0	0.000492429	0	0	0	0	0	0	0	0	0	0	0	0	0	0	0	0	0	0	0	0.00839866	0	0	0	0	0	0	0	0	0	0	0	0	0	0	0	0	0	0	0	0	0	0	0.0078885
Escherichia_fergusonii	0	0	0	0	0	0	0	0	0	0.000127779	0	0	0	0	0	0	0	0	0	0	0	0	0	0	0	0.00727884	0	0	0	0	0	0	0	0	0	0	0	0	0	0	0	0	0	0	0	0	0	0	0
Ethanoligenens_harbinense	0	0	0	0	0	0	0	0	0	0	0	0	0	0	0	0	0	0	0	0	0	0	0	0	0	0	0	0	0	0	0	0	0	0	0	0	0	0	0	0	0	0	2.44147e-05	0	0	0	0	0	0
Eubacterium_aggregans	0	0	0	0	0.000178031	0.000246214	0	0	0	0	0	0	0	0	0	0	0	0	0	0	0	0	0	0	0	0	0	0	0	0	2.43635e-05	0	0	0	0	0	0	0	0	0	0	0	0	0	0	0	0	0	0
Eubacterium_eligens	0	0	0	0	0	0	0	0	0	0	0	0	0	0	0	0	0	0	0	0	0	0	0	0	0	0	0	0	0	0.000705716	0	0	0	4.8534e-06	0	0	0	0	0	0	0	0	0	0	0	0	0	0	0
Eubacterium_hallii	0	0	0	0	0	0	0	0	0	0.000255558	0	0	0	0	0	0	0	0	0	0	0	0	0	0	0	0	0	0	0	0	0	0	0	0	0	0	0	0	0	0	0	0	2.44147e-05	0	0	0	0	0	0
Eubacterium_infirmum	0	0	0	0	0	0.000246214	0	0	0	0	0.000260451	0	0	0	0	0.00200739	0	0	0.00546448	8.60359e-05	0	0	0	0	0	0	0.000187693	0	0.000107724	0.000705716	0.00198563	0	0	0.000609102	0	0	0	0	0	0.0119931	0	0	0.000122073	0.00266383	0	1.47859e-05	0.000554324	0	5.57491e-05
Eubacterium_limosum	0	0	0	0	0	0	0	0	0	0	0	0	0	0	0	0	0	0	0	0	0	0	0	0	0	0	0	0	0	0	6.09088e-05	3.56043e-05	0	0	0	0	0	0	0.00827004	0	0	0	0	0	0	0	0	0	0
Eubacterium_saphenum	0	0	0	0	0	0	0	0	0	0	0	0	0	0	0	0	0	0	0	0	0	0	0	0	0	0	0	0	0	0	0	0	0	0	0	0	0	0	0	0	0	0	6.10366e-05	0	0	0	0	0	0
Eubacterium_siraeum	0	0	0	0	0	0.000246214	0	0	0	0	0	0	0	0	0	0	0	0	0	0	0	0	0	0	0	0	0	0	0	0	0	0	0	0	0	0	0	0	0	0	0	0	0	0	0	0	0.000554324	0	5.57491e-05
Eubacterium_ventriosum	0	0	0	0	0.000178031	0	0	0	0	0	0	0	0	0	0	1.3294e-05	0	0	0	0	0	0	0	0	0	0	0	0	0	0	0	0	0	0	0	0	0	0	0	0	0	0	0	0	0	0	0	0	0
Eubacterium_yurii	0	0	0	0	0	0	0	0	0	0.000127779	0.000130225	0	0	0	0	0.000225998	0	0	0	1.29054e-05	0	0	0	0	0	0	0	1.15154e-05	0	0	0	0	0	0	0	0	0	0	0	0	0	0	0	0	0	0	0	0	0
Ewingella_americana	0	0	0	0	0	0	0	0	0	0	0	0	0	0	0	0	0	0	0	0	0	0	0	0	0	0	0	0	0	0	0	0	0	0	0	0	0	0	0	0	0	0	0	0	0	0	0.000554324	0	5.57491e-05
Exophiala_alcalophila	0	0	0	0	0	0	0	0	0	0.000255558	0	0	0	0	0	0	0	0	0	0	0	0	0	0	0	0	0	0	0	0.00599859	6.09088e-05	8.90107e-05	0	0	0	0	0	0	0	0	0	0	0	0	0	0	0	0	0
Exophiala_aquamarina	0	0	0	0	0	0	0	0	0	0	0	0	0	0	0	0	0	0	0	0	0	0	0	0	0	0	0	0	0	0	2.43635e-05	0	0	0	0	0	0	0	0	0	0	0	0	0	0	0	0	0	0
Exophiala_dermatitidis	0	0	0	0	0	0	0	0	0	0	0	0	0	0	0	0	0	0	0	0	0	0	0	0	0	0	0	0	0	0	0	0	0	0	0	0	0	0	0	0	0	0	0	0	0	1.47859e-05	0	0	0
Exophiala_lecanii-corni	0	0	0	0	0	0	0.000298775	0	0	0	0	0	0	0	0	0	0	0	0	0	0	0	0	0	0	0	0	0	0	0.000705716	2.43635e-05	0	0	0	0	0	0	0	0	0	0	0	0	0	0	0	0	0	0
Exophiala_mesophila	0	0	0	0	0	0	0	0	0	0	0	0	0	0	0	0	0	0	0	0	0	0	0	0	0	0	0	0	0	0	0	0	0	0	0	0	0	0	0	0	0	0	0	0	0	0	0	0	0
Exophiala_oligosperma	0	0	0	0	0	0.000246214	0.000298775	0	0.00276625	0.000127779	0	0	0	0	0	0	0	0	0	0	0	0	0	0	0	0	0	0	0	0	0	0	0	0	0	0	0	0	0.000337553	0	0.000924214	0	0	0	0	0	0	0	5.57491e-05
Exophiala_xenobiotica	0	0	0	0	0	0	0	0	0	0	0	0	0	0	0	0	0	0	0	0	0	0	0	0	0	0	0	0	0	0	0	0	0	0	0	0	0	0	0	0	0	0	0	0	0	0	0	0	0
Ezakiella_massiliensis	0	0	0	0	0	0	0	0	0	0.000127779	0	0	0	0	0	0	0	0	0	0	0	0	0	0	0	0	0	0	0	0.000705716	0	0	0	0	0	0	0	0	0	0	0	0	0	0	0	0	0	0	0
Facklamia_hominis	0	0	0	0	0	0	0	0	0	0	0	0	0	0	0	0	0	0	0	0	0	0	0	0	0	0	0	0	0	0.00105857	0	0	0	0	0	0	0	0	0	0	0	0	0	0	0	0	0	0	0
Facklamia_ignava	0	0	0	0	0	0	0	0	0	0	0	0	0	0	0	0	0	0	0	0	0	0	0	0	0	0	0	0	0	0	0	0	0	0	0	0	0	0	0	0	0	0	0	0	0	0	0	0	0
Faecalibacterium_prausnitzii	0	0	0	0	0	0	0.000298775	0.00548446	0	0.000958344	0	0	0	0	0	1.3294e-05	0.00107991	0	0	4.73198e-05	0	0	0	0	0	0	0	0	0	0	0.000109636	0	0	4.12539e-05	0.000644122	0	0	0	0	0.000456882	0	0	0	0	0.016129	0	0	0	0.00030662
Faecalicatena_contorta	0	0	0	0	0	0	0	0	0	0	0	0	0	0	0	0	0	0	0	0	0	0	0	0	0	0	0	0	0	0	0	0	0	1.21335e-05	0	0	0	0	0	0	0	0	0	0	0	0	0	0	0
Faecalicoccus_pleomorphus	0	0	0	0	0	0	0	0	0	0	0	0	0	0	0	0	0	0	0	0	0	0	0	0	0	0	0	0	0	0	0	0	0	0	0	0	0	0	0	0	0	0	2.44147e-05	0	0	0	0	0	0
Faecalitalea_cylindroides	0	0	0	0	0	0	0	0	0	0.000127779	0	0	0	0	0	0	0	0	0	0	0	0	0	0	0	0	0	0	0	0	0	0	0	0	0	0	0	0	0	0	0	0	0	0	0	0	0	0	0
Fasciola_hepatica	0	0	0	0	0	0	0	0	0	0	0	0	0	0	0	0	0	0	0	0	0	0	0	0	0	0	0	0	0	0.000705716	0	0	0	0	0	0	0	0	0	0	0	0	0	0	0	0	0	0	5.57491e-05
Fenollaria_massiliensis	0	0	0	0	0	0.000246214	0	0	0	0.000255558	0	0	0	3.90381e-05	0	0	0	0	0	0	0	0	0	0	0	0	0	0	0	0.00564573	0	0	0	0	0	0	0	0	0	0	0	0	0	0	0	0	0	0	0
Fenollaria_timonensis	0	0	0	0	0	0	0	0	0	0	0	0	0	0	0	0	0	0	0	0	0	0	0	0	0	0	0	0	0	0	0	0	0	0	0	0	0	0	0	0	0	0	0	0	0	0	0	0	0
Ferriphaselus_amnicola	0	0	0	0	0	0	0	0	0	0	0	0	0	0	0	0	0	0	0	0	0	0	0	0	0	0	0	0	0	0	0	0	0	0	0	0	0	0	0	0	0	0	0	0	0	0	0	0	5.57491e-05
Ferrovum_myxofaciens	0	0	0	0	0	0	0	0	0	0	0	0	0	0	0	0	0	0	0	0	0	0	0	0	0	0	0	0	0	0	0	0	0	0	0	0	0	0	0	0	0	0	0	0	0	0	0	0	0
Fervidicola_ferrireducens	0	0	0	0	0	0	0	0	0	0	0	0	0	0	0	0	0	0	0	0	0	0	0	0	0	0	0	0	0	0	0	0	0	0	0	0	0	0	0	0	0	0	0	0	0	0	0	0	0
Fervidobacterium_nodosum	0	0	0	0	0	0	0.000298775	0	0	0.000127779	0	0	0	0	0	0	0	0	0	0	0	0	0	0	0	0	0	0	0	0	0	0	0	0	0	0	0.00411184	0	0	0	0	0	0	0	0	0	0.00110865	0	0.000111498
Fibrella_aestuarina	0	0	0	0	0	0	0	0	0	0	0	0	0	0	0	0	0	0	0	0	0	0	0	0	0	0	0	0	0	0	0	0	0	0	0.000214707	0	0	0	0	0	0	0	0	0	0	0	0	0	0
Fibrisoma_limi	0	0	0	0	0	0	0	0	0	0	0	0	0	0	0	0	0	0	0	0	0	0	0	0	0	0	0	0	0	0	0	0	0	0	0.000214707	0	0	0	0	0	0	0	0	0	0	0	0	0	0
Fictibacillus_gelatini	0	0	0	0	0	0	0	0	0	0	0	0	0	0	0	0	0	0	0	0	0	0	0	0	0	0	0	0	0	0	0	0	0	0	0	0	0	0	0	0	0	0	0	0	0	0	0	0	0
Filifactor_alocis	0.00118906	0	0	0	0.000178031	0	0.000298775	0	0	0.000255558	0.042193	0	0	0	0	0.00276515	0	0	0	3.44144e-05	0	0	0	0	0	0	0.0168655	0	0	0	2.43635e-05	0	0	1.21335e-05	0.00161031	0	0	0	0	0	0	0	4.88293e-05	0	0	0	0	0	0.000111498
Filobasidium_wieringae	0	0	0	0	0	0	0	0	0	0	0	0	0	0	0	0	0	0	0	0	0	0	0	0	0	0	0	0	0	0	0	0	0	0	0	0	0	0	0	0	0	0	0	0	0	0	0	0	0
Fimbriiglobus_ruber	0	0	0	0	0	0	0	0	0	0.000127779	0	0	0	0	0	0	0	0	0	0	0	0	0	0	0	0	0	0	0	0.000705716	0	0	0	0	0	0	0	0	0	0	0	0	0	0	0	0	0	0	0
Finegoldia_magna	0	0	0	0	0.000267046	0.00135418	0.000746938	0	0	0.0012139	0.000260451	0	0	0	0.00021498	1.3294e-05	0	0	0	4.3018e-06	0.00104712	0.000112549	0	0	0	0	0	0	0	0	2.43635e-05	3.56043e-05	0	0.000116482	0.00203972	0.00902256	0.00164474	0	0	0	0	0	2.44147e-05	0	0	0	0.00110865	0	0.00015331
Flagellimonas_eckloniae	0	0	0	0	0	0	0	0	0	0	0	0	0	0	0	0	0	0	0	0	0	0	0	0	0	0	0	0	0	0	0	0	0	0	0	0	0	0	0	0	0	0	2.44147e-05	0	0	0	0	0	0
Flaviflexus_massiliensis	0	0	0	0	0	0.000246214	0	0	0	0.000511117	0	0	0	0	0	0	0	0	0	0	0.0125654	0	0	0	0	0	0	0	0	0	0	0	0	0	0	0	0	0	0	0	0	0	0	0	0	0	0	0	0
Flavobacterium_aquatile	0	0	0	0	0	0.000984858	0	0	0	0.000766675	0	0	0	0	0	0	0	0	0	0	0	0	0	0	0	0	0	1.15154e-05	0	0.00105857	0	0	0	0	0.000429415	0	0	0	0	0	0	0	2.44147e-05	0	0	0	0	0	0.000111498
Flavobacterium_branchiophilum	0	0	0	0	0	0	0	0	0.0055325	0	0	0	0	0	0	0	0	0	0	0	0	0	0	0	0	0	0	0	0	0.00105857	0	0	0	0	0	0	0	0	0.000337553	0	0	0	2.44147e-05	0	0	0	0	0	5.57491e-05
Flavobacterium_columnare	0	0	0	0	0	0	0.000298775	0	0	0	0	0	0	0	0	0	0	0	0	0	0	0	0	0	0	0	0	0	0	0.000705716	0	0	0	0	0	0	0	0	0	0	0	0	2.44147e-05	0	0	0	0	0	0
Flavobacterium_degerlachei	0	0	0	0	0	0.000246214	0	0	0	0	0	0	0	0	0	0	0	0	0	0	0	0	0	0	0	0	0	0	0	0.000705716	0	0	0	0	0	0	0	0	0.000337553	0	0	0	2.44147e-05	0	0	0	0	0	5.57491e-05
Flavobacterium_indicum	0	0	0	0	0	0	0	0	0	0	0	0	0	0	0	1.3294e-05	0	0	0	0	0	0	0	0	0	0	0	0	0	0.000705716	0	0	0	0	0	0	0	0	0	0	0	0	0	0	0	0	0	0	0
Flavobacterium_johnsoniae	0	0	0	0.0168067	0	0.000615536	0	0	0	0.000383338	0	0	0	0	0	0	0	0	0	0	0	0	0	0	0	0	0	0	0.000215448	0.000705716	0	0	0	4.8534e-06	0.000214707	0	0	0	0	0	0	0	6.10366e-05	0	0	0	0	0	0.00030662
Flavobacterium_psychrophilum	0	0	0	0	0	0.000861751	0.000298775	0	0	0.000638896	0	0	0	0	0	0	0	0	0	4.3018e-06	0.00104712	0	0	0	0	0	0	0	0.000107724	0.000705716	0	0	0	0	0.000429415	0	0	0	0.000506329	0	0	0	0	0	0	0	0	0	0.00015331
Flavobacterium_succinicans	0	0	0	0	0	0.000492429	0	0	0	0.000255558	0	0	0	0	0	0	0	0	0	0	0	0	0	0	0	0	0	0	0	0.00211715	0	3.56043e-05	0	0	0	0	0	0	0	0	0	0	8.54513e-05	0	0	0	0	0	0.00030662
Flavonifractor_plautii	0	0	0	0	0	0	0	0	0	0	0	0	0	0	0	0.000172822	0	0	0	4.3018e-06	0	0	0	0	0	0	0	0	0	0	0	0	0	4.8534e-06	0	0	0	0	0	0	0	0	0	0	0	0	0	0	0
Flectobacillus_major	0	0	0	0	0	0	0	0	0	0	0	0	0	0	0	0	0	0	0	0	0	0	0	0	0	0	0	0	0	0.00105857	0	0	0	0	0	0	0	0	0	0	0	0	0	0	0	0	0	0	0
Fluoribacter_bozemanae	0	0	0	0	0	0	0	0	0	0	0	0	0	0	0	0	0	0	0	0	0	0	0	0	0	0	0	0	0	0	0	0	0	0	0	0	0	0	0	0	0	0	0	0	0	0	0	0	0
Fluoribacter_gormanii	0	0	0	0	0	0	0	0	0	0	0	0	0	0	0	0	0	0	0	0	0	0	0	0	0	0	0	0	0	0	0	0	0	0	0	0	0	0	0	0	0	0	0	0	0	0	0	0	0
Fluviicola_taffensis	0	0	0	0	0	0	0	0	0	0	0	0	0	0	0	0	0	0	0	0	0	0	0	0	0	0	0	0	0.000107724	0	0	0	0	0	0	0	0	0	0	0	0	0	0	0	0	0	0	0	5.57491e-05
Fodinicurvata_sediminis	0	0	0	0	0	0	0	0	0	0	0	0	0	0	0	0	0	0	0	0	0	0	0	0	0	0	0	0	0	0	0	0	0	0	0.000214707	0	0	0	0	0	0	0	0	0	0	0	0	0	0
Fontibacillus_panacisegetis	0	0	0	0	0	0	0	0	0	0	0	0	0	0	0	0	0	0	0	0	0	0	0	0	0	0	0	0	0	0	0	0	0	0	0	0	0	0	0	0	0	0	0	0	0	0	0	0	0
Fontimonas_thermophila	0	0	0	0	0	0	0	0	0	0.000255558	0	0	0	0	0	0	0	0	0	0	0	0	0	0	0	0	0	0	0	0	0	0	0	0	0	0	0	0	0	0	0	0	0	0	0	0	0	0	0
Formivibrio_citricus	0	0	0	0	0	0	0	0	0	0	0	0	0	0	0	0	0	0	0	0	0	0	0	0	0	0	0	0	0	0	0	0	0	0	0	0	0	0	0	0	0	0	0	0	0	0	0	0	0
Fournierella_massiliensis	0	0	0	0	0	0	0	0	0	0.000127779	0	0	0	0	0	0	0	0	0	0	0	0	0	0	0	0	0	0	0	0	0	0	0	0	0	0	0	0	0	0	0	0	0	0	0	0	0	0	0
Franconibacter_helveticus	0	0	0	0	0	0	0	0	0	0	0	0	0	0	0	0	0	0	0	0	0	0	0	0	0	0	0	0	0	0	0	0	0	0	0	0	0	0	0	0	0	0	0	0	0	0	0	0	0
Franconibacter_pulveris	0	0	0	0	0	0	0	0	0	0.000127779	0	0	0	0	0	0	0	0	0	0	0	0	0	0	0	0	0	0	0	0	0	0	0	0	0	0	0	0	0	0	0	0	0	0	0	0	0	0	0
Frankia_alni	0	0	0	0	0	0	0	0	0	0	0	0	0	0	0	0	0	0	0	0	0	0	0	0	0	0	0	0	0	0	0	0	0	0	0	0	0	0	0	0	0	0	0	0	0	0	0	0	0
Frateuria_aurantia	0	0	0	0	0	0	0	0	0	0.000127779	0	0	0	0	0	0	0	0	0	0	0	0	0	0	0	0	0	0	0	0	0	0	0	0	0.000214707	0	0	0	0	0	0	0	0	0	0	0	0	0	0
Fretibacterium_fastidiosum	0	0	0	0	0	0	0	0	0	0.000127779	0.00182315	0	0	0	4.2996e-05	7.97639e-05	0	0	0.00546448	2.58108e-05	0	0	0	0	0	0	0	0	0	0	0	0	0	7.2801e-06	0	0	0	0	0	0	0	0	2.44147e-05	0	0	0	0	0	0
Frischella_perrara	0	0	0	0	0	0	0	0	0	0	0	0	0	0	0	0	0	0	0	0	0	0	0	0	0	0	0	0	0	0	0	0	0	0	0	0	0	0	0	0	0	0	0	0	0	0	0	0	0
Fulvimarina_manganoxydans	0	0	0	0	0	0	0	0	0	0	0	0	0	0	0	0	0	0	0	0	0	0	0	0	0	0	0	0	0	0	0	0	0	0	0	0	0	0	0	0	0	0	0	0	0	0	0	0	0
Fusarium_asiaticum	0	0	0	0	0	0	0	0	0	0	0	0	0	0	0	0	0	0	0	0	0	0	0	0	0	0	0	0	0	0	0	0	0	0	0	0	0	0	0	0	0	0	0	0	0	0	0	0	0
Fusarium_beomiforme	0	0	0	0	0	0	0	0	0	0	0	0	0	0	0	0	0	0	0	0	0	0	0	0	0	0	0	0	0	0	0	0	0	0	0	0	0	0	0	0	0	0	0	0	0	0	0	0	0
Fusarium_euwallaceae	0	0	0	0	0	0	0	0	0	0	0	0	0	0	0	0	0	0	0	0	0	0	0	0	0	0	0	0	0	0	0	0	0	0	0	0	0	0	0	0	0	0	0	0	0	0	0	0	0
Fusarium_fujikuroi	0	0	0	0	0	0	0	0	0	0	0	0	0	0	0	0	0	0	0	0	0	0	0	0	0	0	0	0	0.000107724	0	0	0	0	0	0	0	0	0	0	0	0	0	0	0	0	0	0	0	5.57491e-05
Fusarium_irregulare	0	0	0	0	0	0	0	0	0	0.000127779	0	0	0	0	0	0	0	0	0	0	0	0	0	0	0	0	0	0	0	0	0	0	0	0	0	0	0	0	0	0	0	0	0	0	0	0	0	0	0
Fusarium_metavorans	0	0	0	0	0	0	0	0	0	0	0	0	0	0	0	0	0	0	0	0	0	0	0	0	0	0	0	0	0	0	0	0	0	0	0	0	0	0	0	0	0	0	0	0	0	0	0	0	0
Fusarium_oxysporum	0	0	0	0	0	0	0	0	0	0	0	0	0	0.000136633	0	0	0	0	0	0	0	0	0	0	0	0	0	0	0	0	0	0	0	0	0	0	0	0	0	0	0	0	0	0	0	0	0	0	0
Fusarium_pininemorale	0	0	0	0	0	0	0	0	0	0	0	0	0	0	0	0	0	0	0	0	0	0	0	0	0	0	0	0	0	0	0	0	0	0	0.000429415	0	0	0	0	0	0	0	0	0	0	0	0	0	0
Fusarium_proliferatum	0	0.000406906	0	0	0	0	0.000298775	0	0.00276625	0	0	0	0	1.95191e-05	0	0	0	0	0	0	0	0	0	0	0	0	0	0	0	0.0119972	6.09088e-05	3.56043e-05	0	0	0.0013956	0.00300752	0	0	0	0	0	0	0	0	0	0	0	0	0
Fusarium_sambucinum	0.00237812	0	0	0	0	0	0	0	0	0	0	0	0	0	0	0	0	0	0	0	0	0	0	0	0	0	0	0	0	0	0	0	0	0	0	0	0	0	0	0	0	0	0	0	0	0	0	0	0
Fusarium_verticillioides	0	0	0	0	0	0	0	0	0	0	0	0	0	0	0	0	0	0	0	0	0	0	0	0	0	0	0	0	0	0	0	0	0	0	0	0	0	0	0	0	0	0	0	0	0	0	0	0	0
Fusicatenibacter_saccharivorans	0	0	0	0	0	0.000246214	0	0	0	0.000127779	0	0	0	0	0	0	0	0	0	0	0	0	0	0	0	0	0	0	0	0	0	3.56043e-05	0	0	0	0	0	0	0	0	0	0	0	0	0	0	0	0	0.00015331
Fusobacterium_equinum	0	0	0	0	0	0	0	0	0	0	0	0	0	0	0	1.3294e-05	0	0	0	0	0	0	0	0	0	0	0	0	0	0	0	0	0	0	0	0	0	0	0	0	0	0	0	0	0	0	0	0	0
Fusobacterium_hwasookii	0.00118906	0	0	0	0	0	0.000298775	0	0	0.000894454	0.000781352	0	0	1.95191e-05	0	0.0111404	0.00107991	0	0	8.60359e-06	0	0	0	0.00176835	0	0	0.000429012	1.15154e-05	0	0	0.00264344	0	0	2.18403e-05	0	0	0	0	0	0.000799543	0	0	0	0	0	0	0	0	0
Fusobacterium_mortiferum	0	0	0	0	0	0	0	0	0	0.000127779	0	0	0	0	0	0	0	0	0	0	0	0	0	0	0	0	0	0	0	0	0	0	0	0	0	0	0	0	0	0	0	0	0	0	0	0	0	0	0
Fusobacterium_necrophorum	0	0	0	0	0	0	0	0	0	0	0.000130225	0	0	0	0	9.30579e-05	0	0	0	0	0	0	0	0	0	0	0.000804397	0	0	0	3.65453e-05	3.56043e-05	0	7.2801e-06	0	0	0	0	0	0.00011422	0	0	4.88293e-05	0	0	0	0	0	0
Fusobacterium_nucleatum	0.00356718	0.000232518	0	0	0.000356062	0.000492429	0.000448163	0	0	0.0012139	0.00260451	0	0	0	0	0.00830874	0.00107991	0	0.00546448	7.74323e-05	0	0	0	0.00132626	0	0	0.00273495	0	0.00204675	0.000705716	0.00142526	0	0	0.000128615	0	0	0	0	0	0	0	0	4.88293e-05	0	0	1.47859e-05	0	0	0.00015331
Fusobacterium_periodonticum	0	0.000116259	0	0	0	0.000246214	0.00059755	0	0	0.000638896	0.000130225	0	0	0	0	0.0833134	0.00431965	0	0	8.60359e-06	0	0	0	0	0	0	0.00152836	0.000310917	0	0.000705716	0.000718723	0	0.00129492	0.00159434	0	0	0	0	0	0	0	0	0.00018311	0	0.016129	0	0	0	0.000111498
Fusobacterium_russii	0	0	0	0	0	0	0	0	0	0	0	0	0	0	0	0	0	0	0	0	0	0	0	0	0	0	0	0	0	0	0	0	0	0	0	0	0	0	0	0	0	0	0	0	0	0	0	0	0
Fusobacterium_ulcerans	0	0	0	0	0	0	0	0	0	0	0	0	0	0	0	0	0	0	0	0	0	0	0	0	0	0	0	0	0	0	0	0	0	0	0	0	0	0	0	0	0	0	0	0	0	0	0	0	0
Fusobacterium_varium	0	0	0.00299401	0	0	0	0	0	0	0	0	0	0	0	0	0	0	0	0	0	0	0	0	0	0	0	0	0	0	0	0	0	0	0	0	0	0	0	0	0	0	0	0	0	0	0	0	0	0
GCA_005576555.1	0	0	0	0	0	0.000492429	0	0	0	0.000255558	0	0	0	0	0	0	0	0	0	0	0	0	0	0	0	0	0	0	0	0.000705716	0	0	0	0	0	0	0	0	0	0	0	0	0	0	0	0	0	0	5.57491e-05
Gallaecimonas_xiamenensis	0	0	0	0	0.000178031	0.000246214	0	0	0	0	0	0	0	0	0	0	0	0	0	0	0	0	0	0	0	0	0	0	0	0	0	0	0	0	0	0	0	0	0.000506329	0	0	0	0	0	0	0	0	0	5.57491e-05
Gallibacterium_anatis	0	0	0	0	0	0	0	0	0	0	0	0	0	0	0	1.3294e-05	0	0	0	0	0	0	0	0	0	0	0	0	0	0	0	0	0	4.8534e-06	0	0	0	0	0	0	0	0	0	0	0	0	0	0	0
Gallionella_capsiferriformans	0	0	0	0	0	0	0	0	0	0	0	0	0	0	0	0	0	0	0	4.3018e-06	0	0	0	0	0	0	0	0	0	0.00105857	0	0	0	0	0	0	0	0	0	0	0	0	0	0	0	0	0	0	0
Gardnerella_vaginalis	0	0	0	0	0	0	0.000746938	0	0	0	0	0	0	0	0	1.3294e-05	0	0	0	0	0	0	0	0	0	0	0	0	0	0	0	0	0	0	0.000644122	0	0.00328947	0	0.000506329	0	0	0	0	0	0	0	0	0	0.000710801
Gelidibacter_mesophilus	0	0	0	0	0	0	0	0	0	0	0	0	0	0	0	0	0	0	0	0	0	0	0	0	0	0	0	0	0	0	0	0	0	0	0	0	0	0	0	0	0	0	0	0	0	0	0	0	0
Gemella_asaccharolytica	0	0	0	0	0	0	0	0	0	0	0	0	0	0	0	7.97639e-05	0	0	0	4.3018e-06	0	0	0	0	0	0	0	0	0	0	6.09088e-05	0	0	3.88272e-05	0	0	0	0	0	0	0	0	0	0.000466169	0	0	0	0	0
Gemella_bergeri	0	0	0	0	0	0	0	0	0	0	0	0	0	0	0	1.3294e-05	0.00107991	0	0	4.73198e-05	0	0	0	0	0	0	5.36265e-05	0	0	0	0	0	0	3.88272e-05	0	0	0	0	0	0	0	0	0	0	0	0	0	0	0
Gemella_haemolysans	0	0.000348776	0	0	0	0.000246214	0	0	0	0.00146946	0	0.0175439	0	1.95191e-05	0	0.000545053	0.00107991	0	0	0.0751567	0	0	0.0549451	0.0066313	0	0.0106383	0.00112616	8.0608e-05	0.249488	0.0218772	0.000182726	0	0	0.0215928	0.000214707	0	0.00164474	0	0.000337553	0	0	0	0.00018311	0	0	0.000103501	0.000554324	0	0.000209059
Gemella_morbillorum	0	0	0	0	0	0	0.000298775	0	0	0.00159724	0.000130225	0	0	0	0	0.00372232	0.00647948	0	0	0.00271013	0	0.000112549	0	0	0	0	0.00166242	0.00020152	0.000915652	0.00105857	0.00287489	0	0	0.000873613	0	0	0	0	0.000337553	0	0	0	6.10366e-05	0.000199787	0	0	0	0	0
Gemella_sanguinis	0	0	0	0	0	0	0	0	0	0	0	0	0	0	0	0.0147164	0.0107991	0	0	0.0447473	0	0	0	0	0	0	0.00126022	0.00504376	0	0	0.0493483	0	0	0.0252207	0.000214707	0	0	0	0.00185654	0.00148487	0	0	6.10366e-05	0	0	8.13225e-05	0.00277162	0	0.000250871
Geminicoccus_roseus	0	0	0	0	0	0	0	0	0	0	0	0	0	0	0	0	0	0	0	0	0	0	0	0	0	0	0	0	0	0	0	0	0	0	0	0	0	0	0	0	0	0	0	0	0	0	0	0	0
Gemmata_obscuriglobus	0	0	0	0	0	0	0	0	0	0	0	0	0	0	0	0	0	0	0	0	0	0	0	0	0	0	0	0	0	0	0	0	0	0	0	0	0	0	0.000506329	0	0	0	0	0	0	0	0	0	0
Gemmiger_formicilis	0	0	0	0	0	0	0.000298775	0	0	0	0	0	0	0	0	0	0	0	0	0	0	0	0	0	0	0	0	0	0	0	0	0	0	0	0	0	0	0	0	0	0	0	0	0	0	0	0	0	0.00015331
Gemmobacter_aquatilis	0	0	0	0	0	0	0	0	0	0	0	0	0	0	0	0	0	0	0	0	0	0	0	0	0	0	0	0	0	0	2.43635e-05	0	0	0	0.000214707	0	0	0	0	0	0	0	0	0	0	0	0	0	0
Geobacillus_kaustophilus	0	0	0	0	0	0	0	0	0	0.000383338	0	0	0	0	0	0	0	0	0	0	0	0	0	0	0	0	0	0	0	0	0	0	0	0	0	0	0	0	0	0	0	0	0	0.000199787	0	0	0	0	0
Geobacillus_stearothermophilus	0	0	0	0	0	0	0.00059755	0	0	0.0190391	0	0	0	0	0	0	0	0	0	4.3018e-06	0	0	0	0.000884173	0	0	0	0	0	0	0	0	0	0	0.000214707	0	0	0.000824063	0.000506329	0	0	0	0	0	0	0	0	0	0
Geobacillus_thermodenitrificans	0	0	0	0	0	0.000246214	0	0	0	0.00146946	0	0	0	0	0	0	0	0	0	0	0	0	0	0	0	0	0	0	0	0	0	0	0	0	0	0	0	0	0	0	0	0	0	0.000133191	0	0	0	0	0
Geobacillus_thermoglucosidasius	0	0	0	0	0	0	0	0	0	0	0	0	0	0	0	0	0	0	0	0	0	0	0	0	0	0	0	0	0	0	0	0	0	0	0.00107354	0	0	0	0	0	0	0	0	0	0	0	0	0	0
Geobacillus_thermoleovorans	0	0	0	0	0	0.000615536	0	0	0	0.000766675	0	0	0	0	0	0	0	0	0	0	0	0	0	0	0	0	0	0	0	0	0	0	0	0	0	0	0	0.000824063	0	0	0	0	0	0.000133191	0	0	0	0	5.57491e-05
Geobacter_lovleyi	0	0	0	0	0	0.000246214	0	0	0	0	0	0	0	0	0	0	0	0	0	0	0	0	0	0	0	0	0	0	0	0	0	0	0	0	0	0	0	0	0	0	0	0	0	0	0	0	0	0	0
Geobacter_metallireducens	0	0	0	0	0	0	0	0	0	0	0	0	0	0	0	0	0	0	0	0	0	0	0	0	0	0	0	0	0	0	0	0	0	0	0	0	0	0	0	0	0	0	0	0	0	0	0	0	0
Geobacter_sulfurreducens	0	0	0	0	0	0	0	0	0	0	0	0	0	0	0	0	0	0	0	0	0.00104712	0	0	0	0	0	0	0	0	0	0	0	0	0	0	0	0	0	0	0	0	0	0	0	0	0	0	0	0
Geodermatophilus_obscurus	0	0	0	0	0	0	0	0	0	0.000255558	0	0	0	0	0	3.98819e-05	0	0	0	0	0	0	0	0	0	0	0	0	0	0.00282287	0	0	0	0	0	0	0	0	0.00151899	0	0	0	0	0	0	0	0	0	5.57491e-05
Geofilum_rubicundum	0	0	0	0	0	0	0	0	0	0	0	0	0	0	0	0	0	0	0	0	0	0	0	0	0	0	0	0	0	0	0	0	0	0	0	0	0	0	0	0	0	0	0	0	0	0	0	0	0
Geosporobacter_ferrireducens	0	0	0	0	0	0	0	0	0	0	0	0	0	0	0	0	0	0	0	0	0	0	0	0	0	0	0	0	0	0	0	0	0	0	0	0	0	0	0	0	0	0	0	0	0	0	0	0	0
Geothrix_fermentans	0	0	0	0	0	0	0	0	0	0	0	0	0	0	0	0	0	0	0	0	0	0	0	0	0	0	0	0	0	0	0	0	0	0	0	0	0	0	0	0	0	0	0	0	0	0	0	0	5.57491e-05
Geotrichum_candidum	0	0	0	0	0	0	0	0	0	0	0	0	0	0	0	0	0	0	0	0	0	0	0	0	0	0	0	0	0	0	0	8.90107e-05	0	0	0	0	0	0	0	0	0	0	0	0	0	0	0	0	0
Giesbergeria_anulus	0	0	0	0	0	0	0	0	0	0	0	0	0	0	0	0	0	0	0	0	0	0	0	0	0	0	0	0	0	0.00458716	0	0	0	0	0.000214707	0	0	0	0.000337553	0	0	0	0	0	0	0	0	0	5.57491e-05
Gilliamella_apicola	0	0	0	0	0	0	0	0	0	0	0	0	0	0	0	0	0	0	0	0	0	0	0	0	0	0	0	0	0	0	0	0	0	0	0	0	0	0	0	0	0	0	2.44147e-05	0	0	0	0	0	0
Gilvimarinus_agarilyticus	0	0	0	0	0	0	0	0	0	0	0	0	0	0	0	0	0	0	0	0	0	0	0	0	0	0	0	0	0	0	0	0	0	0	0.000214707	0	0	0	0	0	0	0	0	0	0	0	0	0	0
Gimesia_maris	0	0	0	0	0	0	0	0	0	0	0	0	0	0	0	0	0	0	0	0	0	0	0	0	0	0	0	0	0	0.000705716	0	0	0	0	0	0	0	0	0	0	0	0	0	0	0	0	0	0	0
Glaciibacter_superstes	0	0	0	0	0	0	0	0	0	0	0	0	0	0	0	0	0	0	0	0	0	0	0	0	0	0	0	0	0	0	0	0	0	0	0	0	0	0	0	0	0	0	2.44147e-05	0	0	0	0	0	0
Globicatella_sanguinis	0	0	0	0	0	0.000246214	0	0	0	0	0	0	0	0	0	0	0	0	0	0	0	0	0	0	0	0	0	0	0	0	0	0	0	0	0	0	0	0	0	0	0	0	6.10366e-05	0	0	0	0	0	5.57491e-05
Globicatella_sulfidifaciens	0	0	0	0	0.000267046	0	0.000448163	0	0	0	0	0	0	0	0	0	0	0	0	0	0	0	0	0	0	0	0	0	0	0	0	0	0	0	0	0	0	0	0	0	0	0	0.000158695	0	0	0	0	0	0
Gloeomargarita_lithophora	0	0	0	0	0	0	0	0	0	0	0	0	0	1.95191e-05	0	0	0	0	0	0	0	0	0	0	0	0	0	0	0	0	0	0	0	0	0	0	0	0	0	0	0	0	0	0	0	0	0	0	0
Gluconacetobacter_diazotrophicus	0	0	0	0	0	0	0	0	0	0	0	0	0	0	0	0	0	0	0	0	0	0	0	0	0	0	0	0	0	0	0	0	0	0	0	0	0	0	0	0	0	0	0	0	0	0	0	0	0
Gluconobacter_oxydans	0	0	0	0	0	0	0	0	0	0	0	0	0	0	0	0	0	0	0	0	0	0	0	0	0	0	0	0	0	0	0	0	0	0	0	0	0	0	0	0	0	0	0	0	0	0	0	0	0
Glutamicibacter_arilaitensis	0	0	0	0	0.000267046	0	0	0	0	0.000127779	0	0	0	0	0	0	0	0	0	0	0	0	0	0	0	0	0	0	0	0	2.43635e-05	0	0	0	0.000429415	0	0	0	0	0	0	0	2.44147e-05	0	0	0	0	0	0
Gongylonema_pulchrum	0	0	0	0	0	0	0	0	0	0	0	0	0	0	0	0	0	0	0	0	0	0	0	0	0	0	0	0	0	0.00247001	2.43635e-05	3.56043e-05	0	0	0	0	0	0	0	0	0	0	0	0	0	0	0	0	0
Gordonia_alkanivorans	0	0	0	0	0	0.000246214	0	0	0	0.000127779	0	0	0	0	0	0	0	0	0	0	0	0	0	0	0	0	0	0	0	0	0	0	0	0	0	0	0	0	0	0	0	0	0	0	0	0	0	0	0
Gordonia_amarae	0	0	0	0	0	0	0	0	0	0	0	0	0	0	0	0	0	0	0	0	0	0	0	0	0	0	0	0	0	0	0	0	0	0	0	0	0	0	0	0	0	0	0	0	0	0	0	0	0
Gordonia_bronchialis	0	0	0	0	0	0	0.000298775	0	0	0.000383338	0	0	1.68101e-05	0	0	0	0	0	0.00546448	8.60359e-06	0	0	0	0	0	0	0	0	0	0	3.65453e-05	0	0	0	0	0.00300752	0	0	0.000506329	0	0.000924214	0	2.44147e-05	0	0	0	0.000554324	0	0
Gordonia_effusa	0	0	0	0	0	0	0	0	0	0.000127779	0	0	0	0	0	0	0	0	0	0	0	0	0	0	0	0	0	0	0	0	0	0	0	0	0	0	0	0	0	0	0	0	0	0	0	0	0	0	0
Gordonia_hirsuta	0	0	0	0	0	0	0	0	0	0	0	0	0	0	0	0	0	0	0	0	0	0	0	0	0	0	0	0	0	0	0	0	0	0	0	0	0	0	0	0	0	0	2.44147e-05	0	0	0	0	0	0
Gordonia_malaquae	0	0	0	0	0	0	0.00059755	0	0	0	0	0	0	0	0	0	0	0	0	0	0	0	0	0	0	0	0	0	0	0	0	0	0	0	0	0	0	0	0	0	0	0	0.000146488	0	0	0	0	0	0
Gordonia_neofelifaecis	0	0	0	0	0	0	0	0	0	0	0	0	0	0	0	0	0	0	0	0	0	0	0	0	0	0	0	0	0	0	0	0	0	0	0	0	0	0	0	0	0	0	0	0	0	0	0	0	0
Gordonia_paraffinivorans	0	0	0	0	0	0	0	0	0	0	0	0	0	0	0	0	0	0	0	0	0	0	0	0	0	0	0	0	0	0.00105857	0	0	0	0	0	0	0	0	0	0	0	0	0	0	0	0	0	0	0
Gordonia_polyisoprenivorans	0	0	0	0	0.000178031	0.00270836	0.000896325	0	0	0.00421671	0	0	0	0	0	0	0.00107991	0	0	8.60359e-06	0	0	0	0	0	0	0	0	0.000538619	0	2.43635e-05	0	0	0	0.00182501	0	0	0	0	0	0	0	0.000122073	0	0	0	0	0	0.000905923
Gordonia_rubripertincta	0	0	0	0	0	0	0	0	0	0	0	0	0	0	0	0	0	0	0	0	0	0	0	0	0	0	0	0	0	0	0	0	0	0	0	0	0	0	0	0	0	0	2.44147e-05	0	0	0	0	0	0
Gordonia_sputi	0.00118906	0.000116259	0	0	0	0.000615536	0.000896325	0	0	0.00479172	0	0	0	0	0	0	0	0	0	8.60359e-06	0	0.000112549	0	0	0	0	5.36265e-05	0	0.000215448	0.00494001	0	3.56043e-05	0	0	0.000214707	0.00300752	0	0	0.00421941	0	0	0	8.54513e-05	0.000133191	0.016129	0	0.000554324	0	5.57491e-05
Gordonia_terrae	0	0	0.00449102	0	0	0	0	0	0	0.00108612	0	0	0	0	0	0	0	0	0	0	0	0	0	0	0	0	0	0	0	0.00105857	0.000219272	3.56043e-05	0	0	0.00161031	0	0	0	0	0	0	0	4.88293e-05	0	0	0	0	0	0
Gordonibacter_pamelaeae	0	0	0	0	0	0	0.000298775	0	0	0	0	0	0	0	0	0	0	0	0	0	0	0	0	0	0	0	0	0	0	0	0	0	0	0	0	0	0	0	0	0	0	0	0	0	0	0	0	0	0
Gracilibacillus_boraciitolerans	0	0	0	0	0	0	0	0	0	0	0	0	0	0	0	0	0	0	0	0	0	0	0	0	0	0	0	0	0	0	0	0	0	0	0	0	0	0	0	0	0	0	0	0	0	0	0	0	0
Granulibacter_bethesdensis	0	0	0	0	0.000178031	0	0	0	0	0	0	0	0	0	0	0	0	0	0	0	0	0	0	0	0	0	0	0	0	0.00705716	0	0	0	0	0	0	0	0	0	0.00011422	0	0	0	0	0	0	0	0	0
Granulicatella_adiacens	0.0356718	0	0	0	0.000267046	0.00775576	0.000448163	0	0	0.00159724	0	0	0	0	4.2996e-05	0.00465289	0.00215983	0	0	0.101015	0	0	0.021978	0.00884173	0	0	0.000643518	0.000385767	0	0.000705716	0.00302107	3.56043e-05	0.0433797	4.8534e-06	0.000429415	0	0	0	0	0	0	0	0.000842306	0.0354955	0	0.00207003	0.00221729	0	5.57491e-05
Granulicatella_elegans	0	0	0	0	0	0	0	0	0	0.00191669	0	0	0	1.95191e-05	0	0.000691287	0	0	0	0.000365653	0	0.000112549	0	0.00442087	0	0.00055991	0	0	0.000915652	0.0067043	0	0	0	0.000274217	0.000214707	0	0	0	0	0	0	0	6.10366e-05	0	0	0.000118287	0	0	0
Granulicella_mallensis	0	0	0	0	0	0	0	0	0	0	0	0	0	0	0	0	0	0	0	0	0	0	0	0	0	0	0	0	0	0	0	0	0	0	0	0	0	0	0	0	0	0	0	0	0	0	0	0	0
Granulicoccus_phenolivorans	0	0	0	0	0	0	0	0	0	0	0	0	0	0	0	0	0	0	0	4.3018e-06	0	0	0	0	0	0	0	0	0	0	0	0	0	0	0	0	0	0	0	0	0	0	0	0	0	0	0	0	0
Gryllotalpicola_ginsengisoli	0	0	0	0	0	0	0	0	0	0	0	0	0	0	0	0	0	0	0	0	0	0	0	0	0	0	0	0	0	0	0	0	0	0	0	0	0	0	0	0	0	0	0	0	0	0	0	0	0
Gulbenkiania_indica	0	0	0	0	0	0.000246214	0	0	0	0	0	0	0	0	0	0	0	0	0	0	0	0	0	0	0	0	0	0	0	0.000705716	0	0	0	0	0	0	0	0	0.000337553	0	0	0	0	0	0	0	0	0	0
Gulosibacter_molinativorax	0	0	0	0	0.000178031	0	0.000298775	0	0	0	0	0	0	0	0	0	0	0	0	0	0	0	0	0	0	0	0	0	0	0	0	0	0	4.8534e-06	0	0	0	0	0	0	0	0	4.88293e-05	0	0	0	0	0	0
Haematobacter_massiliensis	0	0	0	0	0	0	0	0	0	0.000255558	0	0	0	0	0	0	0.00107991	0	0	0	0	0	0	0	0	0	0	0	0	0.00211715	0	0	0	0	0	0	0	0	0	0	0	0	0	0.000133191	0	0	0	0	0
Haematobacter_missouriensis	0	0	0	0	0	0	0	0	0	0	0	0	0	0	0	0	0	0	0	0	0.00104712	0	0	0	0	0	0	0	0.000107724	0.00105857	2.43635e-05	0	0	0	0.000214707	0	0	0	0.000337553	0	0	0	0	0	0	0	0	0	5.57491e-05
Haematomicrobium_sanguinis	0	0	0	0	0.00293751	0.00160039	0.00403346	0	0	0	0	0	0	0	0	0	0	0	0	0	0	0	0	0	0	0	0	0	0	0	0	0	0	0	0	0	0	0	0	0	0	0	0.00278327	0	0	0	0	0	0.00045993
Haemophilus_aegyptius	0	0	0	0	0	0	0	0	0	0	0	0	0	0	0	2.6588e-05	0	0	0	0	0	0	0	0	0	0	0	0	0	0	0	0	0	4.8534e-06	0	0	0	0	0	0	0	0	0.000158695	0	0	0	0	0	0
Haemophilus_haemolyticus	0	0.000232518	0	0	0	0.000615536	0	0	0	0.000766675	0.000130225	0	1.68101e-05	0	0	0.00614182	0	0	0	4.3018e-06	0	0.000112549	0	0.00132626	0	0	0	2.30309e-05	0	0	0	0	0	0.000317898	0	0	0	0	0.000337553	0.000685323	0	0	0.000512708	0	0	1.47859e-05	0	0	0
Haemophilus_influenzae	0	0	0	0	0	0	0	0	0	0	0	0	0	0	0	0.000824227	0.00107991	0	0	0	0	0	0	0	0	0	5.36265e-05	0	0.00102338	0	0	0	0	7.2801e-06	0	0	0	0	0	0.00011422	0	0	0.129471	0	0	0	0	0	0
Haemophilus_parahaemolyticus	0	0	0	0	0	0	0	0	0	0.000511117	0	0	0	3.90381e-05	0	0.0055303	0	0	0	0	0	0	0	0	0	0	0.000187693	0	0.378811	0.0105857	0	0	0	0	0	0	0	0	0	0	0	0	0	0	0	0	0	0	0
Haemophilus_parainfluenzae	0.00118906	0.000348776	0	0	0	0.00246214	0	0	0	0.00408893	0	0.0175439	0	1.95191e-05	0.000128988	0.037396	0.00647948	0	0.00546448	4.3018e-06	0	0	0.043956	0.0106101	0	0	0	0.000587287	0	0.00105857	2.43635e-05	0	0	0.0021452	0	0	0	0	0.00101266	0	0	0.0118577	0.000122073	0	0	0	0	0	0
Haemophilus_paraphrohaemolyticus	0	0	0	0	0	0	0	0	0	0	0	0	0	0	0	0.000106352	0	0	0	0	0	0	0	0	0	0	0	0	0.00587095	0	0	0	0	0	0	0	0	0	0	0	0	0	0	0	0	0	0	0	0
Haemophilus_quentini	0	0	0	0	0	0	0	0	0	0	0	0	0	0	0	7.97639e-05	0	0	0	0	0	0	0	0	0	0	0	0	0.000107724	0	0	0	0	0	0	0	0	0	0	0	0	0	0.000146488	0	0	0	0	0	0
Haemophilus_sputorum	0	0	0	0	0	0	0	0	0	0	0	0	0	0	0	0.0037489	0.00107991	0	0	0	0	0	0	0	0	0	0	1.15154e-05	0.000538619	0	0	0	0	4.61073e-05	0	0	0	0	0	0.000228441	0	0	0	0	0	0	0	0	0
Hafnia_alvei	0	0	0	0	0.000356062	0.00307768	0.00149388	0.00548446	0	0.000958344	0	0	0	0	4.2996e-05	0	0	0	0	0	0	0	0	0	0	0	0	0	0	0	7.30905e-05	0	0	7.2801e-06	0.00751476	0	0	0	0	0	0	0.0118577	0	0	0	0	0	0	0.000557491
Hafnia_paralvei	0	0	0	0	0	0	0.0011951	0	0	0.000127779	0	0	0	1.95191e-05	4.2996e-05	0	0	0	0	0	0	0	0	0	0	0.00055991	0	0	0	0.00105857	2.43635e-05	5.34064e-05	0	7.2801e-06	0.00236178	0.00300752	0	0.00164813	0.00472574	0	0.000924214	0	0	0	0	0	0	0	0.00015331
Halalkalibacillus_halophilus	0	0	0	0	0	0	0	0	0	0	0	0	0	0	0	1.3294e-05	0	0	0	0	0	0	0	0	0	0	0	0	0	0	0	0	0	0	0	0	0	0	0	0	0	0	0	0	0	0	0	0	0
Haliangium_ochraceum	0	0	0	0	0	0	0	0	0	0	0	0	0	0	0	0	0	0	0	0	0	0	0	0	0	0	0	0	0	0	0	0	0	0	0	0	0	0	0	0	0	0	2.44147e-05	0	0	0	0	0	0
Haliea_salexigens	0	0	0	0	0	0	0	0	0	0	0	0	0	0	0	0	0	0	0	0	0	0	0	0	0	0	0	0	0	0	0	0	0	0	0	0	0	0	0	0	0	0	0	0	0	0	0	0	0
Hallella_seregens	0	0	0	0	0	0	0	0	0	0	0	0	0	0	0	0	0	0	0	0	0	0	0	0	0	0.00111982	0	0	0	0	0	0	0	0	0	0	0	0	0	0	0	0	0	0	0	0	0	0	0
Haloactinobacterium_album	0	0	0	0	0	0	0	0	0	0	0	0	0	0	0	0	0	0	0	0	0	0	0	0	0	0	0	0	0	0	0	0	0	0	0	0	0	0	0	0	0	0	0	0	0	0	0	0	0
Halococcus_agarilyticus	0	0	0	0	0	0	0	0	0	0	0	0	0	1.95191e-05	0	0	0	0	0	0	0	0	0	0	0	0	0	0	0	0	0	0	0	0	0	0	0	0	0	0	0	0	0	0	0	0	0	0	0
Haloferax_volcanii	0	0	0	0	0	0.000492429	0	0	0	0	0	0	0	0	0	0	0	0	0	0	0	0	0	0	0	0	0	0	0	0	0	0	0	0	0	0	0	0	0	0	0	0	0	0	0	0	0	0	0
Halofilum_ochraceum	0	0	0	0	0	0	0	0	0	0	0	0	0	0	0	0	0	0	0	0	0	0	0	0	0	0	0	0	0	0	0	0	0	0	0	0	0	0	0	0	0	0	0	0	0	0	0	0	0
Halolactibacillus_alkaliphilus	0	0	0	0	0	0	0	0	0	0	0	0	0	0	0	0	0	0	0	0	0	0	0	0	0	0	0	0	0	0	0	0	0	0	0	0	0	0	0	0	0	0	2.44147e-05	0	0	0	0	0	0
Halomonas_elongata	0	0	0	0	0	0	0.000298775	0	0	0	0	0	0	0	0	0	0	0	0	0	0	0	0	0	0	0	0	0	0	0	0	0	0	0	0	0	0	0	0	0	0	0	0	0	0	0	0	0	0
Halomonas_stevensii	0	0.000116259	0	0	0	0.000246214	0	0.00548446	0	0.000127779	0	0	0	1.95191e-05	0	0	0	0	0	0	0	0	0	0	0	0	0	0	0	0	0	0	0	0	0	0	0	0	0.000675105	0	0	0	0	0	0	0	0	0	5.57491e-05
Halothiobacillus_neapolitanus	0	0	0	0	0	0	0	0	0	0	0	0	0	0	0	0	0	0	0	0	0.00104712	0	0	0	0	0	0	0	0	0	0	0	0	0	0	0	0	0	0	0	0	0	0	0	0	0	0	0	0
Hammondia_hammondi	0	0	0	0	0	0	0	0	0	0	0	0	0	0	0	0	0	0	0	0	0	0	0	0	0	0	0	0	0.000107724	0.00176429	0	0	0	0	0	0	0	0	0	0	0	0	0	0	0	0	0	0	0
Hanseniaspora_opuntiae	0	0	0	0	0	0	0	0	0	0	0	0	0	0	0	0	0	0	0	0	0	0	0	0	0	0	0	0	0	0	0	0	0	0	0	0	0	0	0	0	0	0	0	0	0	0	0	0	0
Hanseniaspora_uvarum	0	0.000116259	0	0	0.000534093	0	0	0	0	0	0	0	0	0	0	0	0	0	0	0	0	0	0	0	0	0	0	0	0	0	0	0	0	0	0	0	0	0	0	0	0	0	0	0	0	0	0	0	0
Hathewaya_proteolytica	0	0	0	0	0	0	0	0	0	0	0	0	0	0	0	0	0	0	0	0	0	0	0	0	0	0	0	0	0	0	0	0	0	0	0	0	0	0	0	0	0	0	0	0	0	0	0	0	0
Helcococcus_kunzii	0	0	0	0	0	0.000492429	0.00059755	0	0	0	0	0.0175439	0	1.95191e-05	0	0	0	0	0	4.3018e-06	0	0	0	0	0	0	0	0	0	0	0	0	0	0	0	0	0	0	0	0	0	0	0	0	0	0	0	0	0
Helcococcus_sueciensis	0	0	0	0	0	0	0	0	0	0	0	0	0	0	0	0	0	0	0	0	0	0	0	0	0	0	0	0	0	0	0	0	0	0	0	0	0	0	0	0	0	0	2.44147e-05	0	0	0	0	0	0
Helicobacter_pullorum	0	0	0	0	0	0	0	0	0	0	0	0	0	0	0	0	0	0	0	0	0	0	0	0	0	0	0	0	0	0	0	0	0	0	0	0	0	0	0	0	0	0	0	0	0	0	0	0	0
Henriciella_aquimarina	0	0	0	0	0	0	0	0	0	0	0	0	0	0	0	0	0	0	0	0	0	0	0	0	0	0	0	0	0	0.000705716	0	0	0	0	0	0	0	0	0.000337553	0	0	0	0	0	0	0	0	0	0
Herbaspirillum_seropedicae	0	0	0	0	0	0	0	0	0	0.000255558	0	0	0	5.85572e-05	0	0	0	0	0	0	0	0	0	0	0	0	0	0	0	0	0	0	0	0	0	0	0	0	0.000337553	0	0	0	2.44147e-05	0	0	0	0	0	5.57491e-05
Herbiconiux_solani	0	0	0	0	0	0	0	0	0	0	0	0	0	0	0	0	0	0	0	0	0	0	0	0	0	0	0	0	0	0	0	0	0	0	0	0	0	0	0	0	0	0	0	0	0	0	0	0	0
Herminiimonas_arsenicoxydans	0	0	0.00449102	0	0.000178031	0.000492429	0.000298775	0	0	0	0	0	0	0	0	0	0	0	0	0	0	0	0	0	0	0	0	0	0	0.00105857	0	0	0	0	0.0013956	0	0	0	0.000506329	0	0	0	4.88293e-05	0	0	0	0	0	5.57491e-05
Herpetosiphon_aurantiacus	0	0	0	0	0	0	0	0	0	0	0	0	0	0	0	0	0	0	0	4.3018e-06	0	0	0	0	0	0	0	0	0	0	0	0	0	0	0	0	0	0	0	0	0	0	0	0	0	0	0	0	0
Hespellia_stercorisuis	0	0	0	0	0	0	0	0	0	0	0	0	0	1.95191e-05	0	0	0	0	0	0	0	0	0	0	0	0	0	0	0	0	0	0	0	0	0	0	0	0	0.000337553	0	0	0	0	0	0.016129	0	0	0	0
Histophilus_somni	0	0	0	0	0	0	0	0	0	0	0	0	0	0	0	1.3294e-05	0	0	0	0	0	0	0	0	0	0	0	1.15154e-05	0	0	0	0	0	4.8534e-06	0	0	0	0	0	0	0	0	0	0	0	0	0	0	0
Hoeflea_olei	0	0	0	0	0	0	0	0	0	0.000127779	0	0	0	0	0	0	0	0	0	0	0	0	0	0	0	0	0	0	0	0	0	0	0	0	0	0	0	0	0	0	0	0	0	0	0	0	0	0	0
Holdemanella_biformis	0	0	0	0	0	0.000246214	0.000896325	0	0	0	0	0	0	1.95191e-05	0	0	0.00107991	0	0	0	0	0	0	0	0	0	0	0	0	0	0	0	0	4.12539e-05	0	0	0	0	0	0	0	0	0.000146488	0	0	0	0	0	5.57491e-05
Holdemania_filiformis	0	0	0	0	0	0.000246214	0	0	0	0	0	0	0	0	0	0	0	0	0	0	0	0	0	0	0	0	0	0	0	0	0	0	0	0	0	0	0	0	0	0	0	0	0	0	0	0	0	0	0
Holospora_obtusa	0	0	0	0	0	0	0	0	0	0	0	0	0	0	0	0	0	0	0	0	0	0	0	0	0	0	0	0	0	0	0	0	0	0	0.000214707	0	0	0	0	0	0	0	0	0	0	0	0	0	0
Hoyosella_subflava	0	0	0	0	0	0	0	0	0	0	0	0	0	0	0	0	0	0	0	0	0	0	0	0	0	0	0	0	0	0	0	0	0	0	0	0	0	0	0	0	0	0	2.44147e-05	0	0	0	0	0	0
Human_adenovirus_11	0	0	0	0	0	0	0	0	0	0	0	0	0	0	0	0	0	0	0	0	0	0	0	0	0	0	0	0	0	0	0	0	0	0	0	0	0	0	0	0	0	0	0	0	0	0	0	0	0
Human_adenovirus_14	0	0	0	0	0	0	0	0	0	0	0	0	0	0	0	0	0	0	0	0	0	0	0	0	0	0	0	0	0	0	0	0	0	0	0	0	0	0	0	0	0	0	0	0	0	0	0	0	0
Human_adenovirus_16	0	0	0	0	0	0	0	0	0	0	0	0	0	0	0	0	0	0	0	0	0	0	0	0	0	0	0	0	0	0	0	0	0	0	0	0	0	0	0	0	0	0	0	0	0	0	0	0	0
Human_adenovirus_21	0	0	0	0	0	0	0	0	0	0	0	0	0	0	0	0	0	0	0	0	0	0	0	0	0	0	0	0	0	0	0	0	0	0	0	0	0	0	0	0	0	0	0	0	0	0	0	0	0
Human_adenovirus_34	0	0	0	0	0	0	0	0	0	0	0	0	0	0	0	0	0	0	0	0	0	0	0	0	0	0	0	0	0	0	0	0	0	0	0	0	0	0	0	0	0	0	0	0	0	0	0	0	0
Human_adenovirus_35	0	0	0	0	0	0	0	0	0	0	0	0	0	0	0	0	0	0	0	0	0	0	0	0	0	0	0	0	0	0	0	0	0	0	0	0	0	0	0	0	0	0	0	0	0	0	0	0	0
Human_adenovirus_50	0	0	0	0	0	0	0	0	0	0	0	0	0	0	0	0	0	0	0	0	0	0	0	0	0	0	0	0	0	0	0	0	0	0	0	0	0	0	0	0	0	0	0	0	0	0	0	0	0
Human_adenovirus_55	0	0	0	0	0	0	0	0	0	0	0	0	0	0	0	0	0	0	0	0	0	0	0	0	0	0	0	0	0	0	0	0	0	0	0	0	0	0	0	0	0	0	0	0	0	0	0	0	0
Human_adenovirus_68	0	0	0	0	0	0	0	0	0	0	0	0	0	0	0	0	0	0	0	0	0	0	0	0	0	0	0	0	0	0	0	0	0	0	0	0	0	0	0	0	0	0	0	0	0	0	0	0	0
Human_adenovirus_7	0	0	0	0	0	0	0	0	0	0	0	0	0	0	0	0	0	0	0	0	0	0	0	0	0	0	0	0	0	0	0	0	0	0	0	0	0	0	0	0	0	0	0	0	0	0	0	0	0
Human_adenovirus_B3	0	0	0	0	0	0	0	0	0	0	0	0	0	0	0	0	0	0	0	0	0	0	0	0	0	0	0	0	0	0	0	0	0	0	0	0	0	0	0	0	0	0	0	0	0	0	0	0	0
Human_alphaherpesvirus_1	0	0.00267395	0	0	0	0	0.000896325	0	0.316736	0	0	0	0	0	0	0	0	0.00683413	0	0.000227995	0	0	0	0	0.05	0	5.36265e-05	0.000149701	0	0	0	0.000551867	0	0	0	0	0	0	0	0	0	0	0	0	0	0	0	0.170472	0.000404181
Human_alphaherpesvirus_2	0	0	0	0	0	0	0	0	0	0	0	0	0	0	0	0	0	0	0	0	0	0	0	0	0	0	0	0	0	0	0	0	0	0	0	0	0	0	0	0	0	0	0	0	0	0	0	0	0
Human_betaherpesvirus_5	0	0.0109865	0	0	0.00160228	0.000492429	0	0.21755	0	0	0	0	6.72405e-05	0	0	0	0	0.0338013	0	3.01126e-05	0	0.905684	0	0.000884173	0	0.00671892	0	0.0021649	0	0	0	0	0	0.00020627	0	0	0.0197368	0	0.00151899	0	0	0	0	0	0	0	0	0	0.000111498
Human_betaherpesvirus_6B	0	0	0	0	0	0	0	0	0.35823	0	0	0	0	0	0	0	0	0	0	0	0	0	0	0	0	0	0	0	0	0	0	0	0	1.94136e-05	0	0	0	0	0	0	0	0	0	0	0	0	0.159091	0	0
Human_betaherpesvirus_7	0	0	0	0	0.00258145	0	0	0.00548446	0	0	0	0	0	0	0	0	0	0	0	4.3018e-05	0	0	0	0	0	0	0	2.30309e-05	0	0	0	5.34064e-05	0	7.2801e-06	0	0	0	0	0.00236287	0	0	0	0.000146488	0	0	2.95718e-05	0	0	0
Human_gammaherpesvirus_4	0	0	0.0149701	0	0.00169129	0.000492429	0	0	0	0	0	0	0	0	0.000558947	0	0	0	0	0.304262	0	0	0	0	0	0	0	0.000443344	0	0.00105857	0.000170545	0.000284834	0	0.0396766	0	0	0	0	0.000675105	0	0	0	0	0.0015317	0	0.000539685	0	0	0.000362369
Human_papillomavirus_105	0	0	0	0	0	0	0	0	0	0	0	0	0	0	0	0	0	0	0	0	0	0	0	0	0	0	0	0	0	0	0	0	0	0	0	0	0	0	0	0	0	0	0	0	0	0	0	0	0
Human_papillomavirus_65	0	0	0	0	0	0	0	0	0	0.000127779	0	0	0	0	0	0	0	0	0	0	0	0	0	0	0	0	0	0	0	0	0	0	0	0	0	0	0	0	0	0	0	0	0	0	0	0	0	0	0
Human_papillomavirus_type_124	0	0	0	0	0	0	0	0	0	0	0	0	0	0	0	0	0	0	0	0	0	0	0	0	0	0	0	0	0	0	0	0	0	0	0	0	0	0	0	0	0	0	0	0	0	0	0	0	0
Human_papillomavirus_type_209	0	0	0	0	0	0	0	0	0	0	0	0	0	0	0	0	0	0	0	0	0	0	0	0	0	0	0	0	0	0	0	0	0	0	0.000214707	0	0	0	0	0	0	0	0	0	0	0	0	0	0
Human_parvovirus_B19	0	0	0	0	0	0	0	0	0	0	0	0	0	0	0	0	0	0	0	0	0	0	0	0	0	0	0	0	0	0	0	0	0	0	0	0	0	0	0	0	0	0	0	0	0	0	0	0	0
Humibacter_albus	0	0	0	0	0	0	0	0	0	0	0	0	0	0	0	0	0	0	0	0	0	0	0	0	0	0	0	0	0	0.000705716	0	0	0	0	0	0	0	0	0	0	0	0	0	0	0	0	0	0	0
Hungatella_hathewayi	0	0	0	0	0	0	0	0	0	0	0	0	0	0	0	0	0	0	0	0	0	0	0	0	0	0	0	0	0	0	0	0	0	0	0	0	0	0	0	0	0	0	2.44147e-05	0	0	0	0	0	0
Hyalangium_minutum	0	0	0	0	0	0	0	0	0	0	0	0	0	0	0	0	0	0	0	0	0	0	0	0	0	0	0	0	0	0	0	0	0	0	0	0	0	0	0	0	0	0	0	0	0	0	0	0	0
Hydrobacter_penzbergensis	0	0	0	0	0	0	0	0	0	0.000255558	0	0	0	0	0	0	0	0	0	0	0	0	0	0	0	0	0	0	0	0.00105857	0	0	0	0	0	0	0	0	0	0	0	0	0	0	0	0	0	0	0
Hydrocarboniphaga_daqingensis	0	0	0	0	0	0	0	0	0	0.000383338	0	0	0	0	0	0	0	0	0	0	0	0	0	0	0	0	0	0	0	0	0	0	0	0	0	0	0	0	0	0	0	0	0	0	0	0	0	0	0
Hydrogenibacillus_schlegelii	0	0	0	0	0	0	0	0	0	0	0	0	0	0	0	0	0	0	0	0	0	0	0	0	0	0	0	0	0	0	0	0	0	0	0	0	0	0	0	0	0	0	0	0	0	0	0	0	0
Hydrogenobacter_thermophilus	0	0	0	0	0	0	0	0	0	0	0	0	0	0	0	0	0	0	0	0	0	0	0	0	0	0	0	0	0	0	0	0	0	0	0	0	0	0	0.000337553	0	0	0	0	0	0	0	0	0	0
Hydrogenophaga_taeniospiralis	0	0	0	0	0	0	0	0	0	0	0	0	0	0	0	0	0	0	0	0	0	0	0	0	0	0	0	0	0.000107724	0.00141143	2.43635e-05	0	0	0	0.000214707	0	0	0	0.00118143	0	0	0	0	0	0	0	0	0	5.57491e-05
Hydrotalea_flava	0	0	0	0	0	0.000492429	0.000298775	0	0	0.000958344	0	0	0	0	0	0	0	0	0	0	0	0	0	0	0	0	0	0	0	0.00352858	0	0	0	0	0.000429415	0	0	0	0.000337553	0	0	0	8.54513e-05	0	0	0	0	0	0.000111498
Hylemonella_gracilis	0	0	0	0	0	0	0.000298775	0	0	0	0	0	0	0	0	0	0	0	0	0	0	0	0	0	0	0	0	0	0	0	0	0	0	0	0	0	0	0	0	0	0	0	2.44147e-05	0	0	0	0	0	0
Hymenobacter_aerophilus	0	0	0	0	0	0	0	0	0	0.000127779	0	0	0	0	0	0	0	0	0.00546448	0	0	0	0	0	0	0	0	0	0	0	0	0	0	0	0	0	0	0	0	0	0	0	0	0	0	0	0	0	0
Hyphomicrobium_denitrificans	0	0	0	0	0	0	0	0	0	0	0	0	0	0	0	0	0	0	0	0	0	0	0	0	0	0	0	0	0	0.00105857	0	0	0	0	0	0	0	0	0	0	0	0	0	0	0	0	0	0	0
Hyphomicrobium_nitrativorans	0	0	0	0	0	0	0	0	0	0.000127779	0	0	0	0	0	0	0	0	0	0	0	0	0	0	0	0	0	0	0	0	0	0	0	0	0	0	0	0	0	0	0	0	2.44147e-05	0	0	0	0	0	0
Hyphomonas_neptunium	0	0	0	0	0	0	0	0	0	0	0	0	0	0	0	0	0	0	0	0	0	0	0	0	0	0	0	0	0	0	0	0	0	0	0	0	0	0	0	0	0	0	0	0	0	0	0	0	0
Hyphomonas_polymorpha	0	0	0	0	0	0	0	0	0	0	0	0	0	0	0	0	0	0	0	0	0	0	0	0	0	0	0	0	0	0	0	0	0	0	0	0	0	0	0	0	0	0	0	0	0	0	0	0	5.57491e-05
Ideonella_sakaiensis	0	0	0	0	0	0	0	0	0	0	0	0	0	0	0	0	0	0	0	0	0.00104712	0	0	0	0	0	0	0	0	0.00282287	0	3.56043e-05	0	0	0.0013956	0	0	0	0.000675105	0	0.000924214	0	2.44147e-05	0	0	0	0.000554324	0	0.000111498
Idiomarina_loihiensis	0	0	0	0	0	0	0	0	0	0.000127779	0	0	0	0	0	0	0	0	0	0	0	0	0	0	0	0	0	0	0	0	0	0	0	0	0	0	0	0	0	0	0	0	0	0	0	0	0	0	0
Ignavigranum_ruoffiae	0	0	0	0	0	0	0	0	0	0	0	0	0	0	0	0	0	0	0	0	0	0	0	0	0	0	0	0	0	0	0	0	0	0	0	0	0	0	0	0	0	0	0	0	0	0	0	0	0.000111498
Ileibacterium_massiliense	0	0	0	0	0.000178031	0	0	0	0	0	0.000130225	0	0	0	0	0	0	0	0	0	0	0	0	0	0	0.00055991	0	0	0	0	0	0	0	4.8534e-06	0	0	0	0	0	0	0	0	2.44147e-05	0	0	0	0	0	0
Immundisolibacter_cernigliae	0	0	0	0	0	0	0	0	0	0	0	0	0	0	0	0	0	0	0	0	0.00104712	0	0	0	0	0	0	0	0	0	0	0	0	0	0	0	0	0	0	0	0	0	0	0	0	0	0	0	5.57491e-05
Inquilinus_limosus	0	0	0	0	0	0	0	0	0	0.000127779	0	0	0	0	0	0	0	0	0	0	0	0	0	0	0	0	0	0	0.000107724	0.000705716	0	0	0	0	0	0	0	0	0	0	0	0	0	0	0	0	0	0	5.57491e-05
Insolitispirillum_peregrinum	0	0	0	0	0	0	0	0	0	0	0	0	0	0	0	0	0	0	0	0	0	0	0	0	0	0	0	0	0	0	0	0	0	0	0.000214707	0	0	0	0	0	0	0	0	0	0	0	0	0	0
Intestinibacter_bartlettii	0	0	0	0	0	0	0.000448163	0	0	0	0	0	0	0	0	0	0	0	0	4.3018e-06	0	0	0	0	0	0	0	0	0	0	0	0	0	0	0	0	0	0	0	0	0	0	2.44147e-05	0	0	0	0	0	0
Intestinimonas_butyriciproducens	0	0	0	0	0	0	0	0	0	0	0	0	0	0	0	0	0	0	0	0	0	0	0	0	0	0	0	0	0	0	0	0	0	0	0	0	0	0	0	0	0	0	0	0	0	0	0	0	0
Invertebrate_iridescent_virus_31	0	0	0	0	0	0.000246214	0.000448163	0	0	0	0	0	0	0	0	0	0	0	0	0	0	0	0	0	0	0	0	0	0	0	0	0	0	0	0	0	0	0	0	0	0	0	0	0	0	0	0	0	0.00015331
Invertebrate_iridescent_virus_6	0	0	0	0	0	0	0	0	0	0	0	0	0	0	0	0	0	0	0	0	0	0	0	0	0	0	0	0	0	0	0	0	0	0	0	0	0	0	0	0	0	0	0	0	0	0	0	0	0
Invertebrate_iridovirus_25	0	0	0	0	0	0	0	0	0	0	0	0	0	0	0	0	0	0	0	0	0	0	0	0	0	0	0	0	0	0.000705716	0	0	0	0	0	0	0	0	0	0	0	0	0	0	0	0	0	0	0
Isoptericola_variabilis	0	0	0	0	0	0	0	0	0	0	0	0	0	0	0	0	0	0	0	0	0	0	0	0	0	0	0	0	0	0	0	0	0	0	0	0	0	0	0	0	0	0	0	0	0	0	0	0	0
Isosphaera_pallida	0	0	0	0	0	0	0	0	0	0	0	0	0	0	0	0	0	0	0	0	0	0	0	0	0	0	0	0	0	0.000705716	0	0	0	0	0	0	0	0	0	0	0	0	0	0	0	0	0	0	0
Izhakiella_capsodis	0	0	0	0	0	0	0	0	0	0	0	0	0	0	0	0	0	0	0	0	0	0	0	0	0	0	0	0	0	0	0	0	0	0	0	0	0	0	0	0	0	0	0	0	0	0	0	0	0
Janibacter_indicus	0	0	0	0	0	0.000492429	0.000298775	0	0	0.000766675	0	0	0	0	0	0	0	0	0	0	0	0	0	0	0	0	0	0	0	0	6.09088e-05	3.56043e-05	0	0	0.00257649	0	0.00164474	0	0.00151899	0	0	0	0	0	0	0	0	0	0.00015331
Janibacter_melonis	0	0.000116259	0	0	0	0	0	0	0	0.000127779	0	0	0	0	0	0	0	0	0	0	0	0	0	0	0	0	0	0	0	0.00105857	2.43635e-05	0	0	0	0.000429415	0	0.00164474	0	0.000337553	0	0	0	0	0	0	0	0	0	0
Jeotgalibaca_dankookensis	0	0	0	0	0	0	0	0	0	0	0	0	0	0	0	0	0	0	0	0	0	0	0	0	0	0	0	0	0	0	0	0	0	0	0	0	0	0	0	0	0	0	4.88293e-05	0	0	0	0	0	0
Jeotgalicoccus_saudimassiliensis	0	0	0	0	0	0	0	0	0	0.000127779	0	0	0	0	0	0	0	0	0	0	0	0	0	0	0	0	0	0	0	0	0	0	0	0	0	0.00300752	0	0	0	0	0	0	0	0	0	0	0	0	0.00030662
Jiangella_alkaliphila	0	0	0	0	0	0	0	0	0	0	0	0	0	0	0	0	0	0	0	0	0	0	0	0	0	0	0	0	0.000107724	0	0	0	0	0	0	0	0	0	0	0	0	0	0	0	0	0	0	0	0
Johnsonella_ignava	0	0	0	0	0	0	0.000298775	0	0	0	0.000260451	0	0	0	0	0.000172822	0	0	0	0.000210788	0	0	0	0	0	0	0.00104572	1.15154e-05	0.000107724	0	0.000584724	0	0	0.000148029	0	0	0	0	0	0	0	0	0	0.000199787	0	0	0	0	0
Jonesia_denitrificans	0	0	0	0	0	0	0	0	0	0	0	0	0	0	0	0	0	0	0	0	0	0	0	0	0	0	0	0	0	0	0	0	0	0	0	0	0	0	0	0	0	0	0	0	0	0	0	0	0
Jonquetella_anthropi	0	0	0	0	0	0	0	0	0	0	0.000130225	0	0	0	0	0	0	0	0	0	0	0	0	0	0	0	0	0	0	0	0	0	0	0	0	0	0	0	0	0	0	0	0	0	0	0	0	0	0
Kaistia_adipata	0	0	0	0	0	0	0	0	0	0	0	0	0	0	0	0	0	0	0	0	0	0	0	0	0	0	0	0	0	0.000705716	0	0	0	0	0	0	0	0	0	0	0	0	0	0	0	0	0	0	0
Kallipyga_massiliensis	0	0	0	0	0	0	0	0	0	0	0	0	0	0	0	0	0	0	0	0	0	0	0	0	0	0	0	0	0	0	0	0	0	0	0	0	0	0	0	0	0	0	0	0	0	0	0	0	0
Kandleria_vitulina	0	0	0	0	0	0	0.000298775	0	0	0	0	0	0	0	0	0	0	0	0	0	0	0	0	0	0	0	0	0	0	0	0	0	0	4.8534e-06	0	0	0	0	0	0	0	0	0	0	0	0	0	0	0
Kazachstania_turicensis	0	0	0	0	0	0	0	0	0	0	0	0	0	0	0	0	0	0	0	0	0	0	0	0	0	0	0	0	0	0	0	0	0	0	0	0	0	0	0	0	0	0	0	0	0	0	0	0	0
Kerstersia_gyiorum	0	0	0	0	0	0	0	0	0	0.000127779	0	0	0	1.95191e-05	0	0	0	0	0	0	0	0	0	0	0	0	0	0	0	0	0	0	0	0	0	0	0	0	0	0	0	0	0	0.000133191	0	0	0	0	0
Ketogulonicigenium_vulgare	0	0	0	0	0	0	0	0	0	0.000127779	0	0	0	0	0	0	0	0	0	0	0	0	0	0	0	0	0	0	0	0	0	0	0	0	0	0	0	0	0	0	0	0	0	0	0	0	0	0	0
Kibdelosporangium_phytohabitans	0	0	0	0	0	0	0	0	0	0	0	0	0	0	0	0	0	0	0	0	0	0	0	0	0	0	0	0	0	0	2.43635e-05	0	0	0	0	0	0	0	0	0	0	0	0	0	0	0	0	0	0
Kineococcus_radiotolerans	0	0	0	0	0	0	0	0	0	0.000127779	0	0	0	1.95191e-05	0	0	0	0	0	0	0	0	0	0	0	0	0	0	0	0	0	0	0	0	0	0	0	0	0.000506329	0	0	0	0	0	0	0	0	0	0
Kineosphaera_limosa	0	0	0	0	0.000178031	0.000246214	0	0	0	0	0	0	0	0	0	0	0	0	0	0	0	0	0	0	0	0	0	0	0	0	0	0	0	0	0	0	0	0	0.000337553	0	0	0	2.44147e-05	0	0	0	0	0	5.57491e-05
Kingella_denitrificans	0	0.000116259	0	0	0	0	0	0	0	0	0	0	0	0	0	0.000438701	0	0	0.010929	0	0	0	0	0	0	0	5.36265e-05	0	0	0.000705716	0	0	0	0.000121335	0	0	0	0	0	0.000799543	0	0	0	0	0	5.17507e-05	0	0	0
Kingella_kingae	0	0	0	0	0	0	0	0	0	0	0	0	0	0	0	0	0	0	0	0	0	0	0	0	0	0	0	0	0	0	0	0	0	1.21335e-05	0	0	0	0	0	0	0	0	0	0	0	0	0	0	0
Kingella_oralis	0	0	0	0	0	0	0	0	0	0	0	0	0	5.85572e-05	0	0	0	0	0	0	0	0	0	0	0	0	0	0	0	0	0	0	0	9.70681e-06	0	0	0	0	0	0	0	0	0	0	0	0.00037704	0	0	0
Kitasatospora_setae	0	0	0	0	0	0	0	0	0	0	0	0	0	0	0	0	0	0	0	0	0	0	0	0	0	0	0	0	0	0	0	0	0	0	0	0	0	0	0	0	0	0	2.44147e-05	0	0	0	0	0	0
Klebsiella_aerogenes	0	0	0	0	0	0	0	0	0	0	0	0	0	0	0	0	0	0	0	0	0	0	0	0	0	0	0	0	0	0	0	0	0	0	0	0	0	0	0.000506329	0	0	0	0	0	0	0	0	0	0
Klebsiella_michiganensis	0	0	0	0	0	0	0	0	0	0	0	0	0	0	8.59919e-05	0	0	0	0	4.3018e-06	0.00104712	0	0	0	0	0	0	0	0	0.000705716	0	0	0	0	0	0	0	0	0	0	0	0	0.000122073	0	0	0	0	0	0
Klebsiella_oxytoca	0	0	0	0	0	0	0	0	0	0	0	0	0	0	0.000343968	0	0	0	0	0	0	0	0	0	0	0	0	0	0.000107724	0	0	0	0	0	0	0	0	0	0	0	0	0	0	0	0	0	0	0	0
Klebsiella_pneumoniae	0.00118906	0	0	0	0	0.000861751	0	0	0	0	0	0	0	0	0.00176283	0.000358938	0	0	0	5.16216e-05	0.00418848	0.000225098	0	0	0	0	0	0	0	0	0	0	0	4.8534e-06	0	0	0	0	0.000506329	0	0	0	2.44147e-05	0	0	0	0	0	0
Klebsiella_quasipneumoniae	0	0	0	0	0.000178031	0	0	0	0	0	0	0	0	0	4.2996e-05	0	0	0	0	0	0	0	0	0	0	0	0	0	0	0	2.43635e-05	0	0	0	0	0	0	0	0	0	0	0	0	0	0	0	0	0	0
Klebsiella_variicola	0	0	0	0	0	0.000246214	0	0	0	0.000127779	0	0	0	0	0.000128988	0	0	0	0	4.3018e-06	0	0	0	0	0	0	0	0	0.000107724	0	0	0	0	0	0	0	0	0	0	0	0	0	0	0	0	0	0	0	0
Kluyvera_ascorbata	0	0	0	0	0	0	0	0	0	0	0	0	0	0	0	0	0	0	0	0	0	0	0	0	0	0	0	0	0	0	0	0	0	0	0.000214707	0	0	0	0	0	0	0	0	0	0	0	0	0	0
Kluyvera_cryocrescens	0	0	0	0	0	0	0	0	0	0	0	0	0	0	0	0	0	0	0	0	0	0	0	0	0	0	0	0	0	0	0	0	0	0	0	0	0	0	0	0	0	0	0	0	0	0	0	0	0
Kluyvera_georgiana	0	0	0	0	0	0	0	0	0	0	0	0	0	0	0	0	0	0	0	0	0	0	0	0	0	0	0	0	0	0	0	0	0	0	0	0	0	0	0	0	0	0	0	0	0	0	0	0	0
Kluyvera_intermedia	0	0	0	0	0	0	0	0	0	0.000127779	0	0	0	0	0	1.3294e-05	0	0	0	0	0	0	0	0	0	0	0	0	0	0	0	3.56043e-05	0	0	0	0	0	0	0	0	0	0	0	0	0	0	0	0	0
Knoellia_aerolata	0	0	0	0	0	0.000246214	0	0	0	0.000383338	0	0	0	0	0	0	0	0	0	0	0	0	0	0	0	0	0	0	0	0	0	0	0	0	0	0	0	0	0.000337553	0	0	0	0	0	0	0	0	0	0
Kocuria_kristinae	0	0.000406906	0	0	0	0	0.00388408	0	0	0	0	0	0	0	0	0	0	0	0	2.1509e-05	0	0	0	0	0	0	0	0	0.0136271	0	2.43635e-05	0	0	0	0.00450886	0	0	0	0.000675105	0	0	0	0	0	0	0	0	0	5.57491e-05
Kocuria_palustris	0	0.000348776	0	0	0	0.000492429	0.00134449	0	0	0.00447227	0	0	0	7.80762e-05	0	1.3294e-05	0.00107991	0	0	0	0	0.000112549	0	0	0	0	0	0	0	0.00776288	9.7454e-05	5.34064e-05	0	4.8534e-06	0.0197531	0.00300752	0	0	0	0	0	0	0	0	0	0	0	0	0.00429268
Kocuria_polaris	0	0	0	0	0	0	0	0	0	0.000766675	0	0	0	1.95191e-05	0	0	0	0	0	4.3018e-06	0	0	0	0	0	0	0	1.15154e-05	0	0.00247001	3.65453e-05	0	0	0	0.00203972	0	0	0	0.00118143	0.00011422	0	0	0	0	0	0	0	0	5.57491e-05
Kocuria_rhizophila	0	0	0	0	0.00106819	0.000984858	0.00059755	0	0	0	0	0	0	5.85572e-05	0	0	0	0	0	3.87162e-05	0	0	0	0	0	0	0	0	0	0.00458716	2.43635e-05	0	0	0	0.00611916	0	0	0	0.00118143	0	0	0	0.000671403	0.000133191	0	0	0	0	0.000905923
Kocuria_varians	0	0	0	0	0.000178031	0.000246214	0	0	0	0.000127779	0	0	0	0	0	0	0	0	0	0	0	0	0	0	0	0	0	0	0	0.000705716	0	0	0	0	0.000214707	0	0	0	0	0	0	0	6.10366e-05	0	0	0	0	0	5.57491e-05
Komagataeibacter_hansenii	0	0	0	0	0	0.000246214	0	0	0	0	0	0	0	0	0	0	0	0	0	0	0	0	0	0	0	0	0	0	0	0	0	0	0	0	0.000214707	0	0	0	0	0	0	0	0	0	0	0	0	0	5.57491e-05
Kosakonia_cowanii	0	0	0	0	0	0	0	0	0	0	0	0	0	0	0	0	0	0	0	0	0	0	0	0	0	0	0	0	0	0.000705716	0	0	0	0	0.000429415	0	0	0	0.000337553	0	0	0	0	0	0	0	0	0	0
Krasilnikoviella_flava	0	0	0	0	0	0	0	0	0	0.000127779	0	0	0	0	0	0	0	0	0	0	0	0	0	0	0	0	0	0	0	0	0	0	0	0	0	0	0	0	0	0	0	0	2.44147e-05	0	0	0	0	0	0
Kribbella_flavida	0	0.000116259	0	0	0	0	0	0	0	0	0	0	0	0	0	0	0	0	0	4.3018e-06	0	0	0	0	0	0	0	0	0	0	0	0	0	0	0	0	0	0	0	0	0	0	0	0	0	0	0	0	0
Kribbia_dieselivorans	0	0	0	0	0.000178031	0	0	0	0	0	0	0	0	0	0	0	0	0	0	0	0	0	0	0	0	0	0	0	0	0.000705716	0	0	0	0	0	0	0	0	0	0	0	0	0	0	0	0	0	0	0
Kushneria_aurantia	0	0	0	0	0	0	0	0	0	0	0	0	0	0	0	0	0	0	0	0	0	0	0	0	0	0	0	0	0	0	0	0	0	0	0	0	0	0	0	0	0	0	0	0	0	0	0	0	5.57491e-05
Kytococcus_sedentarius	0	0.000116259	0	0	0.000267046	0.000492429	0.000298775	0	0	0.000766675	0.000390676	0	0	0	0	0	0	0	0	0	0	0	0	0.000884173	0	0	0	0	0	0.00105857	3.65453e-05	3.56043e-05	0	0	0.0013956	0	0	0	0.00236287	0	0	0.0118577	4.88293e-05	0	0	0	0	0	0.00229965
Labrenzia_aggregata	0	0	0	0	0	0	0	0	0	0	0	0	0	0	0	0	0	0	0	0	0	0	0	0	0	0	0	0	0	0	0	0	0	0	0.000429415	0	0	0	0	0	0	0	0	0	0	0	0	0	0
Lachnoanaerobaculum_saburreum	0	0.000116259	0	0	0	0	0.000298775	0	0	0.000255558	0	0	0	0	0	0.000372232	0.00107991	0	0.00546448	0.0113008	0	0	0	0.000884173	0	0	0.000804397	0	0.0022622	0.000705716	0.00168108	0	0	0.00315957	0	0	0	0	0	0.00285551	0	0	9.76586e-05	0.000932339	0	0	0	0	0
Lachnoclostridium_phocaeense	0	0	0	0	0	0	0	0	0	0.000127779	0	0	0	0	0	0	0	0	0	0	0	0	0	0	0	0	0	0	0	0	0	0	0	0	0	0	0	0	0	0	0	0	0	0	0	0	0	0	0
Lachnospiraceae_bacterium_1_4_56FAA	0	0	0	0	0	0	0	0	0	0	0	0	0	0	0	0	0	0	0	0	0	0	0	0	0	0	0	0	0	0	0	0	0	0	0	0	0	0	0	0	0	0	0	0	0	0	0	0	0
Lachnospiraceae_bacterium_2_1_46FAA	0	0	0	0	0	0	0	0	0	0	0	0	0	0	0	0	0	0	0	0	0	0	0	0	0	0	0	0	0	0	0	0	0	0	0	0	0	0	0	0	0	0	0	0	0	0	0	0	0
Lachnospiraceae_bacterium_2_1_58FAA	0	0	0	0	0	0	0	0	0	0	0	0	0	0	0	0	0	0	0	0	0	0	0	0	0	0	0	0	0	0	0	0	0	0	0	0	0	0	0	0	0	0	2.44147e-05	0	0	0	0	0	0
Lachnospiraceae_bacterium_3_1_46FAA	0	0	0	0	0	0	0	0	0	0	0	0	0	0	0	0	0	0	0	4.3018e-06	0	0	0	0	0	0	0	0	0	0	0	0	0	0	0	0	0	0	0	0	0	0	0	0	0	0	0	0	5.57491e-05
Lachnospiraceae_bacterium_6_1_63FAA	0	0	0	0	0	0	0	0	0	0	0	0	0	0	0	0	0	0	0	0	0	0	0	0	0	0	0	0	0	0	0	0	0	0	0	0	0	0	0	0	0	0	0	0	0	0	0	0	0
Lachnospiraceae_bacterium_9_1_43BFAA	0	0	0	0	0	0	0	0	0	0	0	0	0	0	0	0	0	0	0	0	0	0	0	0	0	0	0	0	0.000107724	0	0	0	0	0	0	0	0	0	0	0	0	0	0	0	0	0	0	0	0
Lachnospiraceae_bacterium_TF01-11	0	0	0	0	0	0	0	0	0	0	0	0	0	0	0	0	0	0	0	0	0	0	0	0	0	0	0	0	0	0	0	0	0	0	0	0	0	0	0	0	0	0	0	0	0	0	0	0	0
Lachnospiraceae_bacterium_oral_taxon_082	0	0	0	0	0	0	0.000298775	0	0	0.000255558	0	0	0	0	0	0.00127622	0	0	0.00546448	0.0147681	0	0	0	0.00132626	0	0	0.000348572	0.000109397	0.00102338	0	0.0107443	0	0	0.00274217	0	0	0	0	0	0.00354083	0	0	0.000122073	0.0193127	0	5.17507e-05	0	0	0
Lachnospiraceae_bacterium_oral_taxon_500	0	0	0	0	0.000178031	0	0	0	0	0	0.00117203	0	0	0	0	0.00013294	0	0	0	4.73198e-05	0	0	0	0.000884173	0	0	0.000214506	0	0	0	0.00041418	3.56043e-05	0.000647459	1.21335e-05	0.000429415	0	0	0	0	0.000342661	0	0	0	0	0	2.95718e-05	0	0	5.57491e-05
Lacticigenium_naphtae	0	0	0	0	0	0	0	0	0	0	0	0	0	0	0	0	0	0	0	0	0	0	0	0	0	0	0	0	0	0	0	0	0	0	0	0	0	0	0	0	0	0	2.44147e-05	0	0	0	0	0	0
Lactobacillus_acetotolerans	0	0	0	0	0	0	0	0	0	0	0	0	0	0	0	0	0	0	0	0	0	0	0	0	0	0	0	0	0	0	0	0	0	0	0	0	0	0	0	0	0	0	2.44147e-05	0	0	0	0	0	0
Lactobacillus_acidophilus	0.00356718	0	0	0	0	0	0	0	0	0	0	0	0	0	0	0	0	0	0	0	0	0	0	0	0	0.00055991	0	0	0	0	0	0	0	9.70681e-06	0	0	0	0	0	0	0	0	4.88293e-05	0	0	0	0	0	0
Lactobacillus_agilis	0	0	0	0	0.000267046	0.000492429	0.0011951	0	0	0	0	0	0	0	0	0	0	0	0	0	0	0	0	0	0	0	0	0	0	0	0	0	0	0	0	0	0	0	0	0	0	0.0118577	0.00244147	0	0	0	0	0	0
Lactobacillus_algidus	0	0	0	0	0	0	0	0	0	0	0	0	0	0	0	0	0	0	0	0	0	0	0	0	0	0	0	0	0	0	0	0	0	0	0	0	0	0	0	0	0	0	0	0	0	0	0	0	0
Lactobacillus_alimentarius	0	0	0	0	0	0	0	0	0	0	0	0	0	0	0	0	0	0	0	0	0	0	0	0	0	0	0	0	0	0	0	0	0	0	0	0	0	0	0	0	0	0	2.44147e-05	0	0	0	0	0	0
Lactobacillus_amylolyticus	0	0	0	0	0	0	0	0	0	0	0	0	0	0	0	0	0	0	0	0	0	0	0	0	0	0	0	0	0	0	0	0	0	0	0	0	0	0	0	0	0	0	0	0	0	0	0	0	0
Lactobacillus_amylovorus	0.00237812	0	0	0	0.00124622	0.00640158	0.0095608	0	0	0	0	0	0	0	0	0	0	0	0	0	0	0	0	0	0	0	0	0	0	0	0	0	0	2.18403e-05	0	0	0	0	0	0	0	0	0.00535902	0	0	0	0	0	0.000599303
Lactobacillus_animalis	0	0	0	0	0.000178031	0	0.00164326	0	0	0	0	0	0	0	0	0	0	0	0	0	0	0	0	0	0	0	0	0	0	0	0	0	0	0	0	0	0	0	0	0	0	0	0.000317391	0	0	0	0	0	0.000111498
Lactobacillus_antri	0	0	0	0	0	0.000246214	0.000298775	0	0	0	0	0	0	0	0	0	0	0	0	0	0	0	0	0	0	0	0	0	0	0	0	5.34064e-05	0	0	0	0	0	0	0	0	0	0	4.88293e-05	0	0	0	0	0	0
Lactobacillus_brevis	0	0	0	0	0.000178031	0.000615536	0.000896325	0	0	0	0	0	0	0	0	1.3294e-05	0	0	0.00546448	0	0	0.000112549	0	0	0	0	0	1.15154e-05	0	0	0	3.56043e-05	0.000647459	0	0	0	0	0	0	0	0	0	0.00073244	0	0	0	0	0	5.57491e-05
Lactobacillus_buchneri	0	0	0	0	0	0.000246214	0	0	0	0	0	0	0	0	0	0	0	0	0	0	0	0	0	0	0	0	0	0	0	0	0	0	0	0	0	0	0	0	0	0	0	0	0	0	0	0	0	0	0
Lactobacillus_casei	0	0	0	0	0	0	0	0	0	0	0	0	0	0	0	0	0	0	0	0	0	0	0	0	0	0	0	0	0	0	0	0	0	0	0	0	0	0	0	0	0	0	2.44147e-05	0	0	0	0	0	0
Lactobacillus_coleohominis	0	0	0	0	0	0	0	0	0	0	0	0	0	0	0	0	0	0	0	0	0	0	0	0	0	0	0	0	0	0	0	0	0	4.8534e-06	0	0	0	0	0	0	0	0	0	0	0	0	0	0	0
Lactobacillus_coryniformis	0	0	0	0	0	0.000492429	0	0	0	0.000127779	0	0	0	0	0	0	0	0	0	0	0	0	0	0	0	0	0	0	0	0	0	0	0	0	0	0	0	0	0	0	0	0	6.10366e-05	0	0	1.47859e-05	0	0	5.57491e-05
Lactobacillus_crispatus	0	0	0	0	0	0.000492429	0.000448163	0	0	0.0012139	0	0	0	0	0	0	0	0	0	8.60359e-06	0	0	0	0	0	0.0257559	5.36265e-05	0	0	0	0	0.000178021	0	0	0.00976919	0	0	0	0.000675105	0	0	0	4.88293e-05	0	0	0	0	0	0.00110105
Lactobacillus_curvatus	0	0	0	0	0.00738829	0.00553983	0.0161339	0	0	0.0018528	0	0	0	0	4.2996e-05	0	0	0	0	0	0	0	0	0	0	0	0	0	0	0	2.43635e-05	0	0	0	0	0	0	0	0	0	0	0	0.0111453	0	0	1.47859e-05	0	0	0.00204878
Lactobacillus_delbrueckii	0.00118906	0	0	0	0.000890155	0.0067709	0.00567673	0	0	0.000127779	0	0	0	0	0	0	0	0	0	0.0007184	0	0	0	0	0	0	0	0	0	0	0	0	0	0	0	0	0	0	0	0	0	0	0.00355233	0	0	0	0	0	0.000501742
Lactobacillus_fermentum	0	0	0	0	0	0	0	0	0	0	0	0	0	1.95191e-05	0	0	0	0	0	0.000150563	0.00104712	0	0	0	0	0	0	0	0	0	0	0.000106813	0	0	0	0	0	0	0	0	0	0	8.54513e-05	0	0	1.47859e-05	0	0	0
Lactobacillus_gasseri	0.00118906	0	0	0	0	0	0	0	0	0	0	0	0	0	0.000558947	1.3294e-05	0	0	0	0	0	0	0	0	0	0.00055991	0.000268132	0	0.000754067	0	0	0	0	0	0	0	0	0	0	0	0.00138632	0	0	0	0	0	0	0	0
Lactobacillus_helveticus	0	0	0	0	0	0	0.000298775	0	0	0	0	0	0	0	0	0	0	0	0	0	0	0	0	0	0	0	0	0	0	0	0	0	0	0	0	0	0	0	0	0	0	0	6.10366e-05	0	0	4.43577e-05	0	0	0
Lactobacillus_hominis	0	0	0	0	0	0	0	0	0	0	0	0	0	0	0	0	0	0	0	0	0	0	0	0	0	0	0	0	0	0	0	0	0	0	0	0	0	0	0	0	0	0	0	0	0	0	0	0	0
Lactobacillus_iners	0	0	0	0	0	0.000984858	0.0011951	0	0	0.000511117	0.000260451	0	0	0	0	2.6588e-05	0	0	0	0	0	0	0	0	0	0	0	0	0	0.00352858	0	0	0	4.8534e-06	0	0	0	0	0.0035443	0	0	0	2.44147e-05	0	0	0	0	0	0.000404181
Lactobacillus_johnsonii	0	0	0	0	0.00329357	0.0134187	0.0306244	0	0	0	0	0	0	0	0	3.98819e-05	0	0	0	0	0	0	0	0	0	0	0	0	0	0	0	0	0	0	0	0	0	0	0	0	0	0	0.0175175	0	0	0	0	0	0.00260627
Lactobacillus_kalixensis	0	0	0	0	0	0	0	0	0.00276625	0	0	0	0	0	0	0	0	0	0	0	0	0	0	0	0	0	0	0	0	0	0	0	0	0	0	0	0	0	0	0	0	0	0	0	0	0	0	0	0
Lactobacillus_kefiranofaciens	0	0	0	0	0	0	0	0	0	0	0	0	0	0	0	0	0	0	0	0	0	0	0	0	0	0	0	0	0	0	0	0	0	0	0	0	0	0	0	0	0	0	0	0	0	0	0	0	0
Lactobacillus_kefiri	0	0	0	0	0	0	0	0	0	0	0	0	0	0	0	0	0	0	0	0	0	0	0	0	0	0	0	0	0	0	0	0	0	0	0	0	0	0	0	0	0	0	2.44147e-05	0	0	0	0	0	0
Lactobacillus_mucosae	0.00356718	0	0	0	0.00169129	0.00566293	0.00492979	0	0	0	0	0	0	0	0	0	0	0	0	0	0.00314136	0	0	0	0	0	0.000455825	2.30309e-05	0.000538619	0	0	0	0	4.36806e-05	0	0	0	0	0	0	0	0	0.00258795	0	0	0	0	0	0.00045993
Lactobacillus_oris	0	0	0	0	0	0	0	0	0	0	0	0	0	0	0	0	0	0	0	0	0	0	0	0	0	0	0	0	0	0	0	3.56043e-05	0	0	0	0	0	0	0	0	0	0	0	0	0	0	0	0	0
Lactobacillus_parabuchneri	0	0	0	0	0	0	0	0	0	0	0	0	0	1.95191e-05	0	0	0	0	0	0	0	0	0	0	0	0	5.36265e-05	0	0	0	0	0	0	0	0	0	0	0	0	0	0	0	0	0	0	0	0	0	0
Lactobacillus_paracasei	0	0	0	0	0	0	0	0	0	0.00146946	0	0	0	0	0	0	0	0	0	4.3018e-05	0	0	0	0	0	0	0	0	0	0	0	0.000160219	0	0	0	0	0	0	0	0	0	0	0	0	0	2.95718e-05	0	0	0
Lactobacillus_paraplantarum	0	0	0	0	0	0	0	0	0	0	0	0	0	0	0	0	0	0	0	0	0	0	0	0	0	0	0	0	0	0	0	0	0	0	0	0	0	0	0	0	0	0	2.44147e-05	0	0	0	0	0	0
Lactobacillus_pentosus	0	0	0	0	0.000178031	0	0	0	0	0	0	0	0	0	0	0	0	0	0	0	0	0	0	0	0	0	0	0	0	0	0	0	0	7.2801e-06	0	0	0	0	0	0	0	0	2.44147e-05	0	0	1.47859e-05	0	0	5.57491e-05
Lactobacillus_perolens	0	0	0	0	0	0	0	0	0	0	0	0	0	0	0	0	0	0	0	0	0	0	0	0	0	0	0	0	0	0	0	0	0	0	0	0	0	0	0	0	0	0	0	0	0	1.47859e-05	0	0	0
Lactobacillus_plantarum	0	0	0.00299401	0	0.000178031	0.000246214	0.000298775	0	0	0	0.000130225	0	0	0	0	0	0	0	0	0	0	0	0	0	0	0	0	0	0	0	0	0	0	0	0	0	0	0	0.000675105	0	0	0	0.000122073	0	0	0.000140466	0	0	0
Lactobacillus_reuteri	0	0	0	0	0.0304433	0.06894	0.0896325	0	0	0	0	0	0	0	0	0	0	0	0	0	0	0	0	0	0	0	0	0	0	0	0	0	0	7.2801e-06	0	0	0	0	0.0124895	0	0	0	0.0452648	0	0	0	0	0	0.00883624
Lactobacillus_rhamnosus	0	0	0	0	0	0.000492429	0	0	0	0	0	0	0	0	0	0	0	0	0	0	0	0	0	0	0	0	0	0	0	0	0	0	0	0	0	0	0	0	0	0	0	0	0	0	0	0	0	0	0
Lactobacillus_ruminis	0	0	0	0	0	0	0.00134449	0	0	0	0	0	0	0	0	0	0	0	0	8.60359e-06	0	0	0	0	0	0	0	0	0	0	0	0	0	0	0.000214707	0	0	0	0	0	0	0	0.000451671	0	0	0	0	0	5.57491e-05
Lactobacillus_saerimneri	0	0	0	0	0	0.000492429	0.000298775	0	0	0	0	0	0	0	0	0	0	0	0	0	0	0	0	0	0	0	0	0	0	0	0	0	0	0	0	0	0	0	0	0	0	0	8.54513e-05	0	0	0	0	0	0
Lactobacillus_sakei	0	0	0	0	0.000356062	0	0	0	0	0	0	0	0	0	0	0	0	0	0	0	0	0	0	0	0	0	0	0	0	0	0	0	0	0	0	0	0	0	0	0	0	0	0	0.000399574	0	0	0	0	0
Lactobacillus_salivarius	0.0059453	0	0	0	0.000178031	0.000861751	0.00134449	0	0	0	0	0	0	0	0	1.3294e-05	0	0	0	0.000111847	0.00209424	0	0	0	0	0	0.00361979	1.15154e-05	0.00199289	0	0	0	0.0540628	0.000116482	0	0	0	0	0.00101266	0	0	0	0.000964379	0	0	0.000539685	0	0	0.00030662
Lactobacillus_sanfranciscensis	0	0	0	0	0	0	0	0	0	0.000127779	0	0	0	0	0	0	0	0	0	0	0	0	0	0	0	0	0	0	0	0	0	0	0	0	0	0	0	0	0	0	0	0	0	0	0	0	0	0	0
Lactobacillus_saniviri	0	0	0	0	0	0	0	0	0	0	0	0	0	0	0	0	0	0	0	0	0	0	0	0	0	0	0	0	0	0	0	0	0	0	0	0	0	0	0	0	0	0	2.44147e-05	0	0	0	0	0	0
Lactobacillus_senioris	0	0	0	0	0.000356062	0.00701711	0.00776815	0	0	0	0	0	0	0	0	0	0	0	0	0	0	0	0	0	0	0	0	0	0	0	0	0	0	0	0	0	0	0	0	0	0	0	0.00272223	0	0	0	0	0	0.00239721
Lactobacillus_ultunensis	0	0	0	0	0	0	0	0	0	0	0	0	0	0	0	0	0	0	0	0	0	0	0	0	0	0	0	0	0	0	0	0	0	0	0	0	0	0	0	0	0	0	0	0	0	0	0	0	0
Lactobacillus_vaginalis	0	0	0	0	0.000178031	0.000246214	0.000298775	0	0	0	0	0	0	0	0	0	0	0	0	0	0	0	0	0	0	0	0	0	0	0	0	0	0	3.88272e-05	0	0	0	0	0	0	0	0	0.000158695	0	0	0	0	0	0
Lactobacillus_zymae	0	0	0	0	0	0	0	0	0	0	0	0	0	0	0	0	0	0	0	0	0	0	0	0	0	0	0	0	0	0	0	0	0	0	0	0	0	0	0	0	0	0	0	0	0	1.47859e-05	0	0	0
Lactococcus_garvieae	0	0	0	0	0.0392558	0	0	0	0	0	0	0	0	0	0	6.64699e-05	0	0	0	0	0	0	0	0	0	0.00335946	0	0	0	0	0	0	0	4.12539e-05	0	0	0	0	0	0	0	0	0	0	0.016129	0	0	0	0
Lactococcus_lactis	0.00356718	0	0	0	0	0.0294226	0.0609501	0	0.00276625	0	0	0	0	0	0	2.6588e-05	0	0	0	2.1509e-05	0	0	0	0	0	0	0	0	0	0	0	0	0	0	0	0	0	0	0.000337553	0	0	0	0.0593398	0	0	0	0	0	0.0144251
Lactococcus_piscium	0	0	0	0	0.000356062	0.000861751	0.000896325	0	0	0	0	0	0	0	0	0	0	0	0	4.3018e-06	0	0	0	0	0	0	0	0	0	0	0	0	0	0	0	0	0	0	0	0	0	0	0.000842306	0	0	0	0	0	0.00015331
Lactococcus_raffinolactis	0	0	0	0	0.00356062	0.00320079	0.00582611	0	0	0	0	0	0	0	0	0	0	0	0	0	0	0	0	0	0	0	0	0	0	0	0	0	0	0	0	0	0	0	0.000337553	0.00011422	0	0	0.00568862	0	0	0	0	0	0.00140767
Lacunisphaera_limnophila	0	0	0	0	0	0.000615536	0.000298775	0	0	0.000511117	0	0	0	1.95191e-05	0	0	0	0	0	0	0	0	0	0	0	0	0	0	0	0	0	0	0	0	0.000214707	0	0	0	0	0	0	0	0	0	0	0	0	0	0.00030662
Lagierella_massiliensis	0	0	0	0	0	0	0	0	0	0	0	0	0	0	0	0	0	0	0	0	0	0	0	0	0	0	0	0	0	0	0	0	0	0	0	0	0	0	0	0	0	0	0	0	0	0	0	0	0
Lamprocystis_purpurea	0	0	0	0	0.000267046	0	0	0	0	0	0	0	0	0	0	0	0	0	0	0	0	0	0	0	0	0	0	0	0	0	0	0	0	0	0	0	0	0	0	0	0	0	0	0	0	0	0	0	0
Lampropedia_cohaerens	0	0	0	0	0	0	0	0	0	0	0	0	0	0	0	0	0	0	0	0	0	0	0	0	0	0	0	0	0	0	0	0	0	0	0	0	0	0	0	0	0.000924214	0	0	0	0	0	0	0	0
Laribacter_hongkongensis	0	0	0	0	0	0	0	0	0	0	0	0	0	0	0	0	0	0	0	0	0	0	0	0	0	0	0	0	0	0	0	0	0	0	0	0	0	0	0.000337553	0	0	0	0	0	0	0	0	0	0
Lascolabacillus_massiliensis	0	0	0	0	0	0	0	0	0	0	0	0	0	0	0	0	0	0	0	0	0	0	0	0	0	0	0	0	0.000107724	0	2.43635e-05	0	0	0	0	0	0	0	0	0	0	0	0	0	0	0	0	0	0
Lautropia_mirabilis	0	0.774749	0	0	0.000178031	0	0.000448163	0.0347349	0	0.0012139	0.290402	0	0	0.0049188	0.0888726	0.000784345	0.0172786	0	0.00546448	0.000924886	0	0	0	0.0397878	0	0	0.000134066	0	0	0.00141143	3.65453e-05	0.0185498	0.000971188	0	0.0013956	0	0.00164474	0.0201895	0.00135021	0.0154198	0	0	6.10366e-05	0.00352957	0	0.0539759	0	0	0.000111498
Lawsonella_clevelandensis	0	0	0	0	0	0	0	0	0	0.000255558	0	0	0	0	0	0	0	0	0	0	0	0	0	0	0	0	0	0	0	0.000705716	2.43635e-05	0	0	4.8534e-06	0	0.00451128	0	0	0.000506329	0	0	0	0	0	0	0	0	0	0
Leadbetterella_byssophila	0	0	0	0	0	0	0	0	0	0.000127779	0	0	0	0	0	0	0	0	0	0	0	0	0	0	0	0	0	0	0	0	0	0	0	0	0	0	0	0	0	0	0	0	0	0	0	0	0	0	0
Leclercia_adecarboxylata	0	0	0	0	0	0.000615536	0	0	0	0.000127779	0	0	0	1.95191e-05	4.2996e-05	0	0	0	0	0	0	0	0	0	0	0	0	0	0	0	0	0	0	0	0	0	0	0	0	0	0	0	0	0	0	0	0	0	5.57491e-05
Legionella_anisa	0	0	0	0	0	0	0	0	0	0	0	0	0	0	0	0	0	0	0	0	0	0	0	0	0	0	0	0	0	0	0	0	0	0	0	0	0	0	0	0	0	0	0	0	0	0	0	0	0
Legionella_birminghamensis	0	0	0	0	0	0	0	0	0	0	0	0	0	0	0	0	0	0	0	0	0	0	0	0	0	0	0	0	0	0	0	0	0	0	0	0	0	0	0	0	0	0	0	0	0	0	0	0	0
Legionella_drancourtii	0	0	0	0	0	0.000246214	0	0	0	0	0	0	0	0	0	0	0	0	0	0	0	0	0	0	0	0	0	0	0	0.000705716	0	0	0	0	0	0	0	0	0	0	0	0	2.44147e-05	0	0	0	0	0	0
Legionella_drozanskii	0	0	0.00299401	0	0	0	0.000298775	0	0	0	0	0	0	0	0	0	0	0	0	0	0	0	0	0	0	0	0	0	0	0	0	0	0	0	0.000429415	0	0	0	0.000675105	0	0	0	2.44147e-05	0	0	0	0	0	0
Legionella_feeleii	0	0	0	0	0	0	0	0	0	0	0	0	0	0	0	0	0	0	0	0	0	0	0	0	0	0	0	0	0	0.000705716	0	0	0	0	0	0	0	0	0	0	0	0	0	0	0	0	0	0	0
Legionella_gratiana	0	0	0	0	0	0	0	0	0	0	0	0	0	0	0	0	0	0	0	0	0	0	0	0	0	0	0	0	0	0	0	0	0	0	0	0	0	0	0	0	0	0	0	0	0	0	0	0	0
Legionella_israelensis	0	0	0	0	0	0	0	0	0	0	0	0	0	0	0	0	0	0	0	0	0	0	0	0	0	0	0	0	0	0	0	0	0	0	0	0	0	0	0	0	0	0	0	0	0	0	0	0	0
Legionella_longbeachae	0	0	0	0	0	0	0	0	0	0	0	0	0	0	0	0	0	0	0	0	0	0	0	0	0	0	0	0	0	0.000705716	0	0	0	0	0	0	0	0	0	0	0	0	0	0	0	0	0	0	0
Legionella_maceachernii	0	0	0	0	0	0	0	0	0	0	0	0	0	0	0	0	0	0	0	0	0	0	0	0	0	0	0	0	0	0	0	0	0	0	0	0	0	0	0	0	0	0	2.44147e-05	0	0	0	0	0	0
Legionella_massiliensis	0	0	0	0	0	0.000246214	0	0	0	0.000127779	0	0	0	0	0	0	0	0	0	0	0	0	0	0	0	0	0	0	0	0	0	0	0	0	0	0	0	0	0	0	0	0	2.44147e-05	0	0	0	0	0	0
Legionella_moravica	0	0	0	0	0	0	0	0	0	0	0	0	0	0	0	0	0	0	0	0	0	0	0	0	0	0	0	0	0	0	0	0	0	0	0	0	0	0	0	0	0	0	0	0	0	0	0	0	5.57491e-05
Legionella_pneumophila	0	0	0	0	0	0	0	0	0	0	0	0	0	0	0	0	0	0	0	0	0	0	0	0	0	0	0	0	0	0	0	0	0	0	0	0	0	0	0	0	0	0	0	0	0	0	0	0	0
Legionella_sainthelensi	0	0	0	0	0.00169129	0	0	0	0	0	0	0	0	0	0	0	0	0	0	0	0	0	0	0	0	0	0	0	0	0	0	0	0	0	0	0	0	0	0	0	0	0	0	0	0	0	0	0	0
Legionella_wadsworthii	0	0	0	0	0	0	0	0	0	0	0	0	0	0	0	0	0	0	0	0	0	0	0	0	0	0	0	0	0	0	0	0	0	0	0	0	0	0	0	0	0	0	2.44147e-05	0	0	0	0	0	0
Leifsonia_aquatica	0	0	0	0	0	0	0	0	0	0.000127779	0	0	0	0	0	0	0	0	0	0	0	0	0	0	0	0	0	0	0	0	0	0	0	0	0	0	0	0	0	0	0	0	0	0	0	0	0	0	0
Leifsonia_xyli	0	0	0	0	0	0	0	0	0	0.000127779	0	0	0	0	0	0	0	0	0	0	0	0	0	0	0	0	0	0	0	0.000705716	0	0	0	0	0	0	0	0	0	0	0	0	0	0	0	0	0	0	0
Lelliottia_amnigena	0	0	0	0	0	0	0	0	0	0.000127779	0	0	0	1.95191e-05	0	0	0	0	0	0	0	0	0	0	0	0	0	0	0	0	0	0	0	0	0	0	0	0	0	0	0	0	0	0.000133191	0	0	0	0	0
Leminorella_grimontii	0	0	0	0	0	0	0	0	0	0	0	0	0	0	0	0	0	0	0	0	0	0	0	0	0	0	0	0	0	0	0	0	0	0	0	0	0	0	0	0	0	0	0	0	0	0	0	0	0
Lentzea_albida	0	0	0	0	0	0	0	0	0	0	0	0	0	0	0	0	0	0	0	0	0	0	0	0	0	0	0	0	0	0	2.43635e-05	0	0	0	0.000214707	0	0	0	0	0	0	0	0	0	0	0	0	0	0
Leptonema_illini	0	0	0	0	0	0	0	0	0	0	0	0	0	0	0	0	0	0	0	0	0	0	0	0	0	0	0	0	0	0	0	0	0	0	0	0	0	0	0	0	0	0	0	0	0	0	0	0	0
Leptospira_inadai	0	0	0	0	0	0	0	0	0	0	0	0	0	0	0	0	0	0	0	0	0	0	0	0	0	0	0	0	0	0	0	0	0	0	0	0	0	0	0	0	0	0	0	0	0	0	0	0	0
Leptospira_kmetyi	0.00118906	0	0	0.0168067	0	0	0	0	0	0	0	0	0	0	0	0	0	0	0	0	0	0	0	0	0	0	0	0	0	0	0	0	0	0	0	0	0	0	0	0	0	0	0	0	0	0	0	0	0
Leptospira_noguchii	0	0	0	0	0	0	0.000298775	0	0	0	0	0	0	0	0	0	0	0	0	0	0	0	0	0	0	0	0	0	0	0	0	0	0	0	0	0	0	0	0	0	0	0	0	0	0	0	0	0	0
Leptothrix_cholodnii	0	0	0	0	0	0	0	0	0	0	0	0	0	1.95191e-05	0	0	0	0	0	0	0	0	0	0	0	0	0	0	0	0	0	0	0	0	0.000429415	0	0	0	0.000337553	0	0	0	2.44147e-05	0	0	0	0	0	5.57491e-05
Leptotrichia_buccalis	0	0	0	0	0	0	0.000298775	0	0	0.000511117	0	0	0	0	0	0.000239292	0.00107991	0	0	8.17341e-05	0	0	0	0	0	0	0.000375385	0	0	0	2.43635e-05	0	0.000647459	0.000873613	0	0	0	0	0.000337553	0.000913764	0	0	0	0.000199787	0	0	0	0	5.57491e-05
Leptotrichia_goodfellowii	0	0	0	0	0	0	0	0	0	0	0	0	0	0	0	7.97639e-05	0.00107991	0	0	3.01126e-05	0	0	0	0	0	0	0	1.15154e-05	0	0.000705716	7.30905e-05	0	0	0.000172296	0	0	0	0	0	0.00011422	0	0	0	0	0	0	0	0	0
Leptotrichia_hofstadii	0	0	0	0	0	0	0	0	0	0.000127779	0	0	0	0	0	0.00026588	0	0	0	0.000150563	0	0	0	0	0	0	0.000134066	2.30309e-05	0.000807928	0	9.7454e-05	0	0	0.00554259	0.000214707	0	0	0	0	0.00342661	0	0	6.10366e-05	0	0	0	0	0	0
Leptotrichia_shahii	0	0	0	0	0	0	0	0	0	0	0	0	0	0	0	0.000106352	0.00107991	0	0	8.17341e-05	0	0	0	0	0	0	0.000509452	0	0	0	6.09088e-05	0	0	0.000388272	0	0	0	0	0	0.000456882	0	0	0	0.000332978	0	0	0	0	0
Leptotrichia_trevisanii	0	0	0	0	0	0	0	0	0	0.000255558	0	0	0	0	0	0.000159528	0.00107991	0	0	0.000111847	0	0	0	0	0	0	5.36265e-05	0	0.000807928	0	6.09088e-05	0	0	0.00132498	0	0	0	0	0	0.00148487	0	0	4.88293e-05	0	0	0	0	0	0
Leptotrichia_wadei	0	0	0	0	0	0	0	0	0	0.000127779	0	0	0	1.95191e-05	0	0.000212704	0	0	0	0.000856058	0	0	0	0	0	0	0	0	0.00102338	0.000705716	0.000133999	0	0	0.000674623	0	0	0	0	0	0.000228441	0.000924214	0	0	0.000332978	0	4.43577e-05	0	0	0.000111498
Leucobacter_celer	0	0	0	0	0.000267046	0	0	0	0	0	0	0	0	0	0	0	0	0	0	0	0	0	0	0	0	0	0	0	0	0	0	0	0	0	0	0	0	0	0	0	0	0	6.10366e-05	0	0	0	0	0	0
Leucobacter_chironomi	0	0	0	0	0.000712124	0.000615536	0.00059755	0	0	0.000127779	0	0	0	0	0	0	0	0	0	0	0.0052356	0	0	0.00132626	0	0	0	0	0	0	0	0	0	0	0.000214707	0	0	0	0	0	0	0	0.000158695	0	0.016129	0	0	0	0
Leuconostoc_carnosum	0	0	0	0	0	0	0	0	0	0.000127779	0	0	0	0	0	0	0	0	0	0	0	0	0	0	0	0	0	0	0	0	0	0	0	0	0	0	0	0	0	0	0	0	0	0	0	0	0	0	0
Leuconostoc_citreum	0	0.000348776	0	0	0	0	0	0	0	0.000383338	0	0	0	0	0	0	0	0	0	0	0	0	0	0	0	0	0	0	0	0.000705716	0	0	0	0	0	0	0	0	0	0	0	0	4.88293e-05	0.00173149	0	4.43577e-05	0	0	0
Leuconostoc_fallax	0	0	0	0	0	0	0	0	0	0	0	0	0	0	0	0	0	0	0	0	0	0	0	0	0	0	0	0	0	0	0	0	0	0	0	0	0	0	0.000337553	0	0	0	0	0	0	0	0	0	0
Leuconostoc_gelidum	0	0	0	0	0	0	0	0	0	0.000383338	0	0	0	0	0	0	0	0	0	0	0	0	0	0	0	0	0	0	0	0	0	0	0	0	0	0	0	0	0	0	0	0	0	0.000466169	0	0	0	0	0
Leuconostoc_lactis	0.00118906	0.0195315	0	0	0	0	0.000298775	0	0.00276625	0	0	0	0	0	0.0010749	0	0	0	0	0	0	0	0	0	0	0	0	0	0	0	0	0	0	0	0	0	0	0.0222497	0.000506329	0	0	0	0	0.257059	0	0	0	0	0
Leuconostoc_mesenteroides	0	0	0	0	0	0.000492429	0	0.00548446	0.00276625	0.000638896	0	0	0	0	0	0	0	0	0	0	0	0	0	0	0	0	0	0	0	0	0	0	0	0	0	0	0	0	0.000675105	0	0	0	0	0.00113213	0	0	0	0	0
Leuconostoc_pseudomesenteroides	0	0	0	0	0.000178031	0	0	0	0.00276625	0.000511117	0	0	0	0	0	0	0	0	0	0	0	0	0	0	0	0	0	0	0	0	0	0	0	0	0	0	0	0	0	0	0	0	2.44147e-05	0.000332978	0	0	0	0	0.00015331
Leucothrix_mucor	0	0	0	0	0	0	0	0	0	0	0	0	0	0	0	0	0	0	0	4.3018e-06	0	0	0	0	0	0	0	0	0	0	0	0	0	0	0	0	0	0	0	0	0	0	0	0	0	0	0	0	0
Levyella_massiliensis	0	0	0	0	0	0.000246214	0	0	0	0	0	0	0	0	0	0	0	0	0	0	0	0	0	0	0	0	0	0	0	0	0	0	0	0	0	0	0	0	0	0	0	0	0	0	0	0	0	0	5.57491e-05
Limimonas_halophila	0	0	0	0	0	0	0	0	0	0	0	0	0	0	0	0	0	0	0	0	0	0	0	0	0	0	0	0	0	0.000705716	0	0	0	0	0	0	0	0	0	0	0	0	0	0	0	0	0	0	0
Limnohabitans_planktonicus	0	0	0	0	0	0.00123107	0.000448163	0.00548446	0	0.000511117	0	0	0	0	0	0	0	0	0	0	0.00104712	0	0	0	0	0	0	0	0.000107724	0.00529287	0	0	0	0	0	0	0	0	0.00202532	0	0	0	0.000219732	0	0	0	0	0	0.000209059
Listeria_innocua	0	0	0	0	0	0	0.000298775	0	0	0	0.000130225	0	0	0	0	0	0	0	0	0	0	0	0	0	0	0	0	0	0	0	0	0	0	0	0	0	0	0	0	0	0	0	4.88293e-05	0	0	0	0	0	0
Listeria_seeligeri	0	0	0	0	0	0	0	0	0	0	0	0	0	0	0	0	0	0	0	0	0	0	0	0	0	0	0	0	0	0	0	0	0	0	0	0	0	0	0	0	0	0	0	0	0	0	0	0	0
Litoreibacter_albidus	0	0	0	0	0	0	0	0	0	0	0	0	0	0	0	0	0	0	0	0	0	0	0	0	0	0	0	0	0	0	0	0	0	0	0	0	0	0	0	0	0	0	0	0	0	0	0	0	0
Litorimicrobium_taeanense	0	0	0	0	0	0	0	0	0	0	0	0	0	0	0	0	0	0	0	0	0	0	0	0	0	0	0	0	0	0.000705716	0	0	0	0	0	0	0	0	0	0	0	0	0	0	0	0	0	0	0
Loktanella_atrilutea	0	0	0	0	0	0	0	0	0	0	0	0	0	0	0	0	0	0	0	0	0	0	0	0	0	0	0	0	0	0	0	0	0	0	0	0	0	0	0.000337553	0	0	0	0	0	0	0	0	0	0
Longispora_albida	0	0	0	0	0	0	0	0	0	0	0	0	0	0	0	0	0	0	0	0	0	0	0	0	0	0	0	0	0	0	0	0	0	0	0	0	0	0	0	0	0	0	0	0	0	0	0	0	0
Lonsdalea_quercina	0	0	0	0	0	0	0	0	0	0	0	0	0	0	0	0	0	0	0	0	0	0	0	0	0	0	0	0	0	0	0	0	0	0	0	0	0	0	0	0	0	0	0	0	0	0	0	0	0
Lunatimonas_lonarensis	0	0	0	0	0	0	0	0	0	0	0	0	0	0	0	0	0	0	0	0	0	0	0	0	0	0	0	0	0	0	0	0	0	0	0	0	0	0	0	0	0	0	0	0	0	0	0	0	0
Luteibacter_rhizovicinus	0	0	0	0	0.000178031	0	0	0	0	0	0	0	0	0	0	0	0	0	0	0	0	0	0	0	0	0	0	0	0	0	0	0	0	0	0	0	0	0	0	0	0	0	0	0	0	0	0	0	0
Luteimonas_abyssi	0	0	0	0	0.000623108	0	0.000298775	0	0	0	0	0	0	0	0	0	0	0	0	0	0	0	0	0	0	0	0	0	0	0	0	0	0	0	0	0	0	0	0	0	0	0	0	0	0	0	0	0	0
Luteipulveratus_halotolerans	0	0	0	0	0	0	0	0	0	0	0	0	0	0	0	0	0	0	0	0	0	0	0	0	0	0	0	0	0	0	0	0	0	0	0	0	0	0	0	0	0	0	2.44147e-05	0	0	0	0	0	0.000209059
Lutibacter_flavus	0	0	0	0	0	0	0	0	0	0	0	0	0	0	0	0	0	0	0	0	0	0	0	0	0	0	0	0	0	0	0	0	0	0	0	0	0	0	0	0	0	0	0	0	0	0	0	0	5.57491e-05
Lutimaribacter_saemankumensis	0	0	0	0	0	0	0	0	0	0	0	0	0	0	0	0	0	0	0	0	0	0	0	0	0	0	0	0	0	0	0	0	0	0	0	0	0	0	0	0	0	0	0	0	0	0	0	0	0
Lysinibacillus_macroides	0	0	0	0	0	0	0	0	0	0	0	0	0	0	0	0	0	0	0	0	0	0	0	0	0	0	0	0	0	0	0	0	0	0	0	0	0	0	0	0	0	0	0	0	0	0	0	0	0
Lysinibacillus_sphaericus	0	0	0	0	0	0	0	0	0	0	0	0	0	0	0	0	0	0	0	0	0	0	0	0	0	0	0	0	0	0	0	0	0	0	0.000214707	0	0	0	0	0	0	0	0	0	0	0	0	0	0
Lysinimicrobium_flavum	0	0	0	0	0	0	0	0	0	0	0	0	0	0	0	0	0	0	0	4.3018e-06	0	0	0	0	0	0	0	0	0	0	0	0	0	0	0	0	0	0	0	0	0	0	0	0	0	0	0	0	0
Lysobacter_antibioticus	0	0.000116259	0	0	0.000534093	0	0	0	0	0	0	0	0	0	0	0	0	0	0	0	0	0	0	0	0	0	0	0	0	0.00105857	0	0	0	0	0	0	0	0	0	0	0	0	0	0	0	0	0	0	5.57491e-05
Macacine_gammaherpesvirus_4	0	0	0	0	0	0	0	0	0	0	0	0	0	0	0	0	0	0	0	8.60359e-06	0	0	0	0	0	0	0	0	0	0	0	0	0	0	0	0	0	0	0	0	0	0	0	0	0	0	0	0	0
Macrococcus_canis	0	0	0	0	0.000178031	0	0.000298775	0	0	0	0	0	0	0	0	0	0	0	0	0	0	0	0	0	0	0	0	0	0	0	0	0	0	0	0	0	0	0	0	0	0	0	8.54513e-05	0	0	0	0	0	0.000250871
Macrococcus_caseolyticus	0	0.000232518	0	0	0.0091686	0.0422258	0.0489991	0	0	0.000127779	0	0	0	0	0	0	0	0	0	0	0	0	0	0	0	0	0	0	0	0.00176429	0	0	0	0	0.000644122	0	0	0	0.000337553	0	0	0	0.0265631	0	0	0	0	0	0.00539373
Macrophomina_phaseolina	0.00118906	0	0	0	0	0	0	0	0	0	0	0	0	0	0	0	0	0	0	0	0	0	0	0	0	0	0	0	0	0	0	0	0	0	0	0	0	0	0	0	0	0	0	0	0	0	0	0	5.57491e-05
Mageeibacillus_indolicus	0	0	0	0	0	0	0	0	0	0	0	0	0	0	0	0	0	0	0	4.3018e-06	0	0	0	0	0	0	0	0	0	0	0	0	0	7.2801e-06	0	0	0	0	0	0	0	0	0	0	0	0	0	0	0
Magnetospirillum_gryphiswaldense	0	0	0	0	0	0	0	0	0	0	0	0	0	0	0	0	0	0	0	0	0	0	0	0	0	0	0	0	0	0	0	0	0	0	0	0	0	0	0.000337553	0	0	0	0	0	0	0	0	0	0
Magnetospirillum_magneticum	0	0	0	0	0	0	0	0	0	0	0	0	0	0	0	0	0	0	0	0	0	0	0	0	0	0	0	0	0	0	0	0	0	0	0	0	0	0	0	0	0	0	0	0	0	0	0	0	0
Mahella_australiensis	0	0	0	0	0	0	0	0	0	0	0	0	0	0	0	0	0	0	0	0	0	0	0	0	0	0	0	0	0	0	0	0	0	0	0	0	0	0	0	0	0	0	0	0	0	0	0	0	0
Malassezia_caprae	0	0	0	0	0	0	0	0	0	0	0	0	0	0	0	0	0	0	0	0	0	0	0	0	0	0	0	0	0	0	0	0	0	0	0	0	0	0	0	0	0	0	0	0	0	0	0	0	0
Malassezia_cuniculi	0	0	0	0	0	0	0	0	0	0	0	0	0	0	0	0	0	0	0	0	0	0	0	0	0	0	0	0	0	0	0	0	0	0	0	0	0	0	0	0	0	0	0	0	0	0	0	0	0
Malassezia_dermatis	0	0	0	0	0	0	0	0	0	0	0	0	0	0	0	0	0	0	0	0	0	0	0	0	0	0	0	0	0	0	0	0	0	0	0	0	0	0	0	0	0	0	0	0	0	0	0	0	0
Malassezia_furfur	0	0.000116259	0	0	0	0.000246214	0	0	0	0	0	0	0	5.85572e-05	0	0	0	0	0	1.29054e-05	0	0.00416432	0	0	0	0	0	0	0.000107724	0.00176429	7.30905e-05	0	0	4.8534e-06	0.00085883	0	0	0	0	0	0	0	2.44147e-05	0	0	0	0	0	0
Malassezia_globosa	0	0.00209266	0	0	0	0.00393943	0.00134449	0	0	0.00255558	0.000520901	0	0	0	0	0	0	0	0.00546448	0	0.00104712	0.000112549	0	0	0	0	0	2.87886e-05	0	0.00705716	0.000109636	0	0.000647459	0	0.014278	0.0285714	0	0	0	0	0	0	9.76586e-05	0	0	2.95718e-05	0	0	0.000557491
Malassezia_japonica	0	0.00226705	0	0	0	0.000492429	0.000298775	0.00914077	0	0.000383338	0	0	0	0	0	0	0	0	0	0	0.00104712	0	0.021978	0	0	0	0	0	0	0.00352858	2.43635e-05	3.56043e-05	0	4.8534e-06	0	0	0	0	0.000506329	0	0	0	0	0	0	0	0	0	0.0124321
Malassezia_pachydermatis	0	0	0	0	0	0	0	0	0	0	0	0	0	0	0	0	0	0	0	0	0	0	0	0	0	0	0	0	0	0	0	0	0	0	0	0	0	0	0	0	0	0	0	0	0	0	0	0	0
Malassezia_restricta	0	0	0	0	0	0	0	0	0	0	0	0	0	0	0	3.98819e-05	0	0	0	0	0	0	0	0	0	0	0	0	0	0	0	0	0	0	0.0147075	0	0	0	0	0	0	0	0.000573744	0	0	0	0	0	0.00210453
Malassezia_slooffiae	0	0	0	0	0	0.000246214	0	0	0	0	0	0	0	0	0	0	0	0	0	0	0	0	0	0	0	0	0	0	0	0	0	0	0	4.8534e-06	0	0	0	0	0.00219409	0	0	0	0	0	0	0	0	0	0
Malassezia_sympodialis	0	0	0	0	0	0	0	0	0	0.000255558	0	0	0	0	0	0	0	0	0	0	0	0	0	0	0	0	0	0	0	0.000705716	0	0	0	0	0	0	0	0	0	0	0	0	0	0	0	0	0	0	0
Malassezia_yamatoensis	0	0	0	0	0	0	0	0	0	0	0	0	0	0	0	0	0	0	0	0	0	0	0	0	0	0	0	0	0	0	3.65453e-05	0	0	0	0	0	0	0	0	0	0	0	0	0	0	0	0	0	0.00165854
Mameliella_alba	0	0	0	0	0	0	0	0	0	0	0	0	0	0	0	0	0	0	0	0	0	0	0	0	0	0	0	0	0	0	0	0	0	0	0.000214707	0	0	0	0.000337553	0	0	0	2.44147e-05	0	0	0	0	0	0
Mangrovibacter_phragmitis	0	0	0	0	0	0	0	0	0	0	0	0	0	0	0	0	0.00107991	0	0	0	0	0	0	0	0	0	0	0	0	0	0	0	0	0	0	0	0	0	0	0	0	0	0	0	0	0	0	0	0
Mannheimia_haemolytica	0	0	0	0	0	0	0	0	0	0	0	0	0	0	0	1.3294e-05	0	0	0	0	0	0	0	0	0	0	0	0	0	0	0	0	0	0	0	0	0	0	0	0	0	0	0	0	0	0	0	0	0
Marinibacterium_profundimaris	0	0	0	0	0	0	0	0	0	0	0	0	0	0	0	0	0	0	0	0	0	0	0	0	0	0	0	0	0	0	0	0	0	0	0	0	0	0	0	0	0	0	0	0	0	0	0	0	0
Marinimicrobium_agarilyticum	0	0	0	0	0	0	0	0	0	0	0	0	0	0	0	0	0	0	0	0	0	0	0	0	0	0	0	0	0	0	0	0	0	0	0	0	0	0	0	0	0	0	0	0	0	0	0	0	0
Mariniradius_saccharolyticus	0	0	0	0	0	0	0	0	0	0	0	0	0	0	0	0	0	0	0	0	0	0	0	0	0	0	0	0	0	0	0	0	0	0	0	0	0	0	0	0	0	0	0	0	0.016129	0	0	0	0
Marinithermus_hydrothermalis	0	0	0	0	0	0	0	0	0	0	0	0	0	0	0	0	0	0	0	0	0	0	0	0	0	0	0	0	0	0	0	0	0	0	0	0	0	0	0	0	0	0	0	0	0	0	0	0	0
Marinobacter_adhaerens	0	0	0	0	0	0	0	0	0	0	0	0	0	0	0	0	0	0	0	0	0	0	0	0	0	0	0	0	0	0	0	0	0	0	0	0	0	0	0	0	0	0	0	0	0	0	0	0	5.57491e-05
Marinobacter_aquaeolei	0	0	0	0	0	0	0	0	0	0	0	0	0	0	0	0	0	0	0	0	0	0	0	0	0	0	0	0	0	0	0	0	0	0	0	0	0	0	0	0	0	0	0	0	0	0	0	0	0
Marinobacter_hydrocarbonoclasticus	0	0	0	0	0	0.000246214	0	0	0	0.000511117	0.000130225	0	0	1.95191e-05	0	0	0	0	0.00546448	4.3018e-06	0.00418848	0	0	0	0	0	0	0	0	0	0	0	0	0	0	0	0	0	0	0	0	0	0	0	0	0	0	0	0
Marinobacterium_georgiense	0	0	0	0	0	0	0	0	0	0	0	0	0	0	0	0	0	0	0	0	0	0	0	0	0	0	0	0	0	0	0	0	0	0	0	0	0	0	0	0	0	0	0	0	0	0	0	0	0
Marinococcus_halotolerans	0	0	0	0	0	0	0	0	0	0.000255558	0	0	0	0	0	0.000119646	0	0	0	0	0	0	0	0	0	0	0	0	0	0	0	0	0	0	0	0	0	0	0	0	0	0	0	0	0	0	0	0	0
Marinospirillum_alkaliphilum	0	0	0	0	0	0	0	0	0	0	0	0	0	0	0	0	0	0	0	0	0	0	0	0	0	0	0	0	0	0	0	0	0	0	0	0	0	0	0	0	0	0	0	0	0	0	0	0	0
Marinovum_algicola	0	0	0	0	0	0	0	0	0	0	0	0	0	0	0	0	0	0	0	0	0	0	0	0	0	0	0	0	0	0	0	0	0	0	0	0	0	0	0	0	0	0	0	0	0	0	0	0	0
Marmoricola_aequoreus	0	0	0	0	0	0	0	0	0	0.000255558	0	0	0	0	0	0	0	0	0	0	0	0	0	0	0	0	0	0	0	0	0	0	0	0	0.000214707	0	0	0	0	0	0	0	0	0.000133191	0	0	0	0	0.000111498
Martelella_endophytica	0	0	0	0	0	0	0	0	0	0	0	0	0	0	0	0	0	0	0	0	0	0	0	0	0	0	0	0	0	0	0	0	0	0	0	0	0	0	0	0	0	0	0	0	0	0	0	0	0
Massilia_alkalitolerans	0	0	0	0	0	0	0	0	0	0.00159724	0	0	0	0	0	0	0	0	0	0	0	0	0	0	0	0	0	0	0.000269309	0.00211715	0	0	0	0	0.000214707	0	0	0	0.000337553	0	0	0	0	0.000133191	0	0	0	0	0.000111498
Massilia_putida	0	0.000232518	0.00299401	0	0.000356062	0.00246214	0.00164326	0	0.0055325	0.00159724	0	0	0	0	0	0	0	0	0	4.3018e-06	0	0	0	0	0	0	0	1.15154e-05	0	0.000705716	0	0.000160219	0	0	0.00955448	0.0075188	0	0	0	0	0	0	0	0	0	0	0	0	0.000752613
Massilia_timonae	0	0.000116259	0	0	0.000178031	0.000984858	0	0	0	0.00274725	0	0	0	3.90381e-05	0	0	0	0	0	0	0.00104712	0	0	0	0	0	0	0	0	0.00176429	0	0	0	0	0.0030059	0	0	0	0.00337553	0	0	0	0.000122073	0	0	0	0	0	0
Massiliomicrobiota_timonensis	0	0	0	0	0	0	0	0	0	0	0	0	0	0	0	0	0	0	0	0	0	0	0	0	0	0	0	0	0	0	0	0	0	4.8534e-06	0	0	0	0	0	0	0	0	0	0	0	0	0	0	0
Mastigocladopsis_repens	0	0	0	0	0	0	0	0	0	0	0.000130225	0	0	0	0	0	0	0	0	0	0	0	0	0	0	0	0	0	0	0	0	0	0	0	0	0	0	0	0	0	0	0	0	0	0	0	0	0	0
Mastigocladus_laminosus	0	0	0	0	0	0	0	0	0	0.000127779	0	0	0	0	0	0	0	0	0	0	0	0	0	0	0	0	0	0	0	0	0	0	0	0	0	0	0	0	0	0	0	0	0	0	0	0	0	0	0
Mediterranea_massiliensis	0	0	0	0	0	0	0	0	0	0	0	0	0	0	0	0	0	0	0	0	0	0	0	0	0	0	0	0	0	0	0	0	0	0	0	0	0	0	0	0	0	0	0	0	0	0	0	0	0
Megamonas_funiformis	0	0	0	0	0	0.000615536	0	0	0	0.0197419	0	0	0	0	0	0	0	0	0	0	0	0	0	0	0	0	0	0	0.000107724	0	2.43635e-05	0	0	0	0	0	0	0	0.000675105	0	0	0	0	0	0	0	0	0	0
Megamonas_hypermegale	0	0	0	0	0	0	0	0	0	0.000127779	0	0	0	0	0	0	0	0	0	0	0	0	0	0	0	0	0	0	0	0	0	0	0	0	0	0	0	0	0	0	0	0	0	0	0	0	0	0	0
Megasphaera_cerevisiae	0	0	0	0	0	0	0	0	0	0	0	0	0	0	0	0	0	0	0	0	0	0	0	0	0	0	0	0	0	0	0	0	0	0	0	0	0	0	0	0	0	0	0	0	0	0	0	0	0
Megasphaera_elsdenii	0	0	0.00299401	0	0	0	0	0	0	0	0	0	0	0	0	0	0	0	0	0	0	0	0	0	0	0	0	0	0	0	0	0	0	0	0	0	0	0	0	0	0	0	0	0	0	1.47859e-05	0	0	0
Megasphaera_micronuciformis	0	0	0	0	0.00204736	0.000492429	0	0.00548446	0	0	0	0	0	0.000507495	0	0.000119646	0	0	0	7.31305e-05	0	0	0	0.0141468	0	0	0.00311034	0	0.000269309	0.000705716	0.00321598	5.34064e-05	0.000971188	2.66937e-05	0	0	0	0	0	0.0285551	0	0	0	0.000199787	0	0.00397001	0	0	0
Meiothermus_ruber	0	0	0	0	0	0	0	0	0	0	0	0	0	0	0	0	0	0	0	0	0	0	0	0	0	0	0	0	0	0.000705716	0	0	0	0	0	0	0	0	0	0	0	0	0	0	0	1.47859e-05	0	0	0
Meiothermus_silvanus	0	0	0	0	0	0	0	0	0	0	0	0	0	0	0	0	0	0	0	0	0	0	0	0	0	0	0	0	0	0	0	0	0	0	0.00085883	0	0	0	0.00101266	0	0	0	0	0	0	0	0	0	0
Melaminivora_alkalimesophila	0	0	0	0	0	0.000615536	0	0	0	0.000255558	0	0	0	1.95191e-05	0	0	0	0	0	8.60359e-06	0	0.000112549	0	0.00751547	0	0	0	0	0.000107724	0.000705716	0	3.56043e-05	0.000647459	0	0.00182501	0	0	0	0.000675105	0	0	0	2.44147e-05	0	0	0	0	0	0.000111498
Memnoniella_echinata	0	0	0	0	0	0	0	0	0	0	0	0	0	0	0	0	0	0	0	0	0	0	0	0	0	0	0	0	0	0.00176429	0	0	0	0	0	0	0	0	0	0	0	0	0	0	0	0	0	0	0
Merdimonas_faecis	0	0	0	0	0	0	0	0	0	0	0	0	0	0	0	0	0	0	0	0	0	0	0	0	0	0	0	0	0	0	0	0	0	0	0	0	0	0	0	0	0	0	0	0	0	0	0	0	0
Mesonia_mobilis	0	0	0	0	0	0	0	0	0	0	0	0	0	0	0	0	0	0	0	0	0	0	0	0	0	0	0	0	0	0	0	0	0	0	0	0	0	0	0	0	0	0	0	0	0	0	0	0	0
Mesorhizobium_australicum	0	0	0	0	0	0	0	0	0	0	0	0	0	0	0	0	0	0	0	0	0	0	0	0	0	0	0	0	0	0	0	0	0	0	0	0	0	0	0	0	0	0	0	0	0	0	0	0	0
Mesorhizobium_ciceri	0	0	0.00299401	0	0	0.000246214	0	0	0	0.000127779	0	0	0	0	0	0	0	0	0	0	0	0	0	0	0	0	0	0	0.000107724	0.00141143	0	0	0	0	0	0	0.00164474	0	0	0	0	0	0	0	0	0	0	0	5.57491e-05
Mesorhizobium_loti	0	0	0	0	0	0.000615536	0.000298775	0	0	0.000127779	0	0	0	0	0	0	0	0	0	0	0	0	0	0	0	0	0	0	0	0.00211715	0	3.56043e-05	0	0	0	0	0	0	0	0	0	0	0	0.000199787	0	0	0.000554324	0	0.000209059
Mesorhizobium_opportunistum	0	0	0	0	0	0.000246214	0.000298775	0	0	0.000127779	0	0	0	0	0	0	0	0	0	0	0	0	0	0	0	0	0	0	0	0.00105857	0	0	0	0	0	0	0.00164474	0	0	0	0	0	2.44147e-05	0	0	0	0	0	0
Metallibacterium_scheffleri	0	0	0	0	0	0	0	0	0	0	0	0	0	0	0	0	0	0	0	0	0	0	0	0	0	0	0	0	0	0	0	0	0	0	0.000214707	0	0	0	0	0	0	0	0	0	0	0	0	0	0
Metarhizium_acridum	0	0	0	0	0	0	0	0	0	0	0	0	0	0	0	0	0	0	0	0	0	0	0	0	0	0	0	0	0	0	0	0	0	0	0	0	0	0	0	0	0	0	0	0	0	0	0	0	0
Metarhizium_album	0	0	0	0	0	0	0	0	0	0.000511117	0	0	0	0	0	0	0	0	0	0	0	0	0	0	0	0	0	0	0	0.00141143	0	0	0	0	0.000214707	0	0.00164474	0	0	0	0	0	0	0	0	0	0	0	0
Metarhizium_majus	0	0	0	0	0	0	0	0	0	0	0	0	0	0	0	0	0	0	0	0	0	0	0	0	0	0	0	0	0	0	0	0	0	0	0	0	0	0	0	0	0	0	0	0	0	0	0	0	0
Metarhizium_rileyi	0	0	0	0	0	0	0	0	0	0.000255558	0	0	0	0	0	0	0	0	0	0	0	0	0	0	0	0	0	0	0	0	0	0	0	0	0	0	0	0	0	0	0	0	0	0	0	0	0	0	0
Methanobrevibacter_ruminantium	0	0	0	0	0	0	0	0	0	0	0	0	0	0	0	0	0	0	0	0	0	0	0	0	0	0	0	0	0	0	0	0	0	0	0	0	0	0	0	0	0	0	2.44147e-05	0	0	0	0	0	0
Methanobrevibacter_smithii	0	0	0	0	0.000534093	0.000492429	0.00059755	0	0	0	0.000260451	0	0	0	0	0	0	0	0	4.3018e-06	0	0	0	0	0	0	0	0	0	0	0	0	0	0	0	0	0	0	0	0	0	0	0.000122073	0.000133191	0	1.47859e-05	0	0	0
Methanocorpusculum_labreanum	0	0	0	0	0	0	0	0	0	0	0	0	0	0	0	0	0	0	0	0	0	0	0	0	0	0	0	0	0	0	0	0	0	0	0	0	0	0	0	0	0	0	0	0	0	0	0	0	0
Methanoculleus_marisnigri	0	0	0	0	0	0	0	0	0	0	0	0	0	0	0	0	0	0	0	0	0	0	0	0	0	0	0	0	0	0	2.43635e-05	0	0	0	0	0	0	0	0	0	0	0	0	0	0	0	0	0	0
Methanosarcina_mazei	0	0	0	0	0	0	0	0	0	0	0	0	0	0	0	0	0	0	0	0	0	0	0	0	0	0	0	0	0	0	0	0	0	0	0	0	0	0	0	0	0	0	0	0	0	0	0	0	0
Methanospirillum_hungatei	0	0	0	0	0	0	0	0	0	0	0	0	0	0	0	0	0	0	0	0	0	0	0	0	0	0	0	0	0	0	0	0	0	0	0	0	0	0	0	0	0	0	0	0	0	0	0	0	0
Methanothermobacter_thermautotrophicus	0	0	0	0	0	0	0	0	0	0	0	0	0	0	0	0	0	0	0	0	0	0	0	0	0	0	0	0	0	0	0	0	0	0	0	0	0	0	0	0	0	0	0	0	0	0	0	0	0
Methylacidiphilum_infernorum	0	0	0	0	0	0	0	0	0	0	0	0	0	0	0	0	0	0	0	0	0	0	0	0	0	0	0	0	0	0	0	0	0	0	0	0	0	0	0	0	0	0	0	0	0	0	0	0	0
Methylibium_petroleiphilum	0	0	0	0	0	0	0	0	0	0.000127779	0	0	0	1.95191e-05	0	0	0	0	0	4.3018e-06	0	0	0	0	0	0	0	0	0	0.00388144	0	0	0	0	0.00085883	0	0	0	0.000506329	0	0	0	0	0	0	0	0	0	5.57491e-05
Methylobacillus_flagellatus	0	0	0	0	0	0.000246214	0.000298775	0	0	0	0	0	0	0	0	0	0	0	0	4.3018e-06	0.00104712	0	0	0	0	0	0	0	0	0	0	0	0	0	0	0	0	0	0	0	0	0	0	0	0	0	0	0	0
Methylobacter_luteus	0	0	0	0	0	0	0	0	0	0	0	0	0	0	0	0	0	0	0	0	0	0	0	0	0	0	0	0	0	0	0	0	0	0	0	0	0	0	0	0	0	0	0	0	0	0	0	0	0
Methylobacterium_aquaticum	0	0.000116259	0	0	0.000356062	0.00123107	0	0	0	0.00204447	0	0	0	0.000175671	0	0	0.00107991	0	0.00546448	0	0	0	0	0	0	0	0	0	0.000215448	0.00458716	3.65453e-05	8.90107e-05	0	4.8534e-06	0.00257649	0	0	0	0	0	0	0	0.000146488	0	0	0	0	0	5.57491e-05
Methylobacterium_brachiatum	0	0.000232518	0	0	0.000178031	0.000861751	0	0	0	0.00971122	0	0	0	0.000761243	0	0	0	0	0	0	0	0	0	0	0	0	0	0	0	0.00458716	2.43635e-05	0	0	4.8534e-06	0.00257649	0	0	0	0	0	0	0	6.10366e-05	0.000133191	0	0	0	0	0.00015331
Methylobacterium_extorquens	0	0.000348776	0	0	0	0.00775576	0.00149388	0	0.00276625	0.00728341	0.000130225	0	0	0	0	0	0	0	0	8.60359e-06	0	0.000112549	0	0	0	0	0	1.15154e-05	0	0.0328158	0	0.000320439	0	0	0	0.00451128	0	0	0	0	0	0	0.000146488	0	0	0	0	0.000518941	0.00289895
Methylobacterium_mesophilicum	0	0	0.00299401	0	0.000178031	0.000246214	0	0	0	0.0162918	0	0	0	0.000858838	0	0	0	0	0	0	0.00104712	0	0	0	0	0	0	1.15154e-05	0.000107724	0.00247001	2.43635e-05	0	0	7.2801e-06	0.00182501	0	0	0	0.00202532	0	0	0.0118577	6.10366e-05	0	0	0	0	0	5.57491e-05
Methylobacterium_nodulans	0	0	0	0	0	0	0	0	0	0.000383338	0	0	0	1.95191e-05	0	0	0	0	0	0	0	0	0	0	0	0	0	0	0	0	0	0	0	0	0.000214707	0	0	0	0.000506329	0	0	0	0	0	0	0	0	0	0
Methylobacterium_populi	0	0	0	0	0	0.000615536	0.000298775	0	0	0.0106696	0	0	0	9.75953e-05	0	0	0	0	0	4.3018e-06	0	0	0	0	0	0	0	0	0.000107724	0.00141143	2.43635e-05	0	0.000647459	0	0.00182501	0	0.00164474	0	0.00101266	0	0.000924214	0	0	0	0.016129	0	0	0	5.57491e-05
Methylobacterium_radiotolerans	0	0	0	0	0	0.00283147	0.00164326	0.00914077	0	0.15998	0.000130225	0	1.68101e-05	0.0180746	0	1.3294e-05	0	0	0	0	0	0	0	0	0	0	0	0	0	0	0	0.000124615	0	0	0	0	0	0.00247219	0.00624473	0	0	0	0	0	0	0	0	0	0.00045993
Methylobrevis_pamukkalensis	0	0	0	0	0	0.000246214	0	0	0	0	0	0	0	0	0	0	0	0	0	0	0	0	0	0	0	0	0	0	0	0	0	0	0	0	0	0	0	0	0	0	0	0	0	0	0	0	0	0	0
Methylocaldum_szegediense	0	0	0	0	0	0	0	0	0	0	0	0	0	0	0	0	0	0	0	0	0	0	0	0	0	0	0	0	0	0	0	0	0	0	0.000214707	0	0	0	0	0	0	0	0	0	0	0	0	0	0
Methylocapsa_acidiphila	0	0	0	0	0	0.000246214	0	0	0	0	0	0	0	0	0	0	0	0	0	0	0	0	0	0	0	0	0	0	0	0	0	0	0	0	0	0	0	0	0	0	0	0	0	0	0	0	0	0	0
Methyloceanibacter_caenitepidi	0	0	0	0	0	0	0	0	0	0	0	0	0	0	0	0	0	0	0	0	0	0	0	0	0	0	0	0	0	0	0	0	0	0	0	0	0	0	0	0	0	0	0	0	0	0	0	0	0
Methylococcus_capsulatus	0	0	0	0	0	0	0	0	0	0.000127779	0	0	0	0	0	0	0	0	0	0	0.00104712	0	0	0	0	0	0	0	0	0	0	0	0	0	0	0	0	0	0	0	0	0	0	0	0	0	0	0	0
Methyloferula_stellata	0	0	0	0	0	0	0	0	0	0.000127779	0	0	0	0	0	0	0	0	0	0	0	0	0	0	0	0	0	0	0	0	0	0	0	0	0	0	0	0	0	0	0	0	0	0	0	0	0	0	0
Methylophilus_methylotrophus	0	0	0	0	0	0.000492429	0	0	0	0	0	0	0	0	0	0	0	0	0	0	0	0	0	0	0	0	0	0	0	0.00141143	0	0	0	0	0.000214707	0	0	0	0	0	0	0	0	0	0	1.47859e-05	0	0	0.00015331
Methylosinus_trichosporium	0	0	0	0	0	0	0	0	0	0.000127779	0	0	0	0	0	0	0	0	0	0	0	0	0	0	0	0	0	0	0	0	0	0	0	0	0	0	0	0	0	0	0	0	0	0	0	0	0	0	0
Methylotenera_mobilis	0	0	0	0	0	0.000615536	0.000448163	0	0.00276625	0	0	0	0	0	0	0	0.00107991	0	0	0	0	0	0	0	0	0	0	0	0	0.01235	0	0	0	0	0.000214707	0	0	0	0	0	0	0	0	0	0	0	0.000554324	0	0.000209059
Methyloversatilis_discipulorum	0	0	0.00299401	0	0	0.000246214	0	0	0	0.000638896	0	0.0175439	0	0	0	0	0	0	0	8.60359e-06	0.00418848	0	0	0	0	0	0	0	0	0.00141143	2.43635e-05	3.56043e-05	0	4.8534e-06	0.00397209	0	0	0	0	0	0	0	0	0	0	0	0.00110865	0	0.000111498
Methylovulum_miyakonense	0	0	0	0	0	0	0	0	0	0	0	0	0	0	0	0	0	0	0	0	0	0	0	0	0	0	0	0	0	0	0	0	0	0	0	0	0	0	0	0	0	0	0	0	0	0	0	0	5.57491e-05
Meyerozyma_guilliermondii	0	0	0	0	0	0	0.000298775	0	0	0.000383338	0	0	0	0	0.000128988	0	0	0	0	0	0	0	0	0	0	0	0	0	0	0.00705716	0	0	0	0	0	0	0	0	0	0	0	0	6.10366e-05	0	0	0	0	0	0
Micavibrio_aeruginosavorus	0	0	0	0	0	0	0	0	0	0	0	0	0	0	0	0	0	0	0	0	0	0	0	0	0	0	0	0	0	0	0	0	0	0	0	0	0	0	0	0	0	0	0	0	0	1.47859e-05	0	0	5.57491e-05
Microbacterium_arborescens	0	0	0	0	0	0	0	0	0	0.000127779	0	0	0	0	0	0	0	0	0	0	0	0	0	0	0	0	0	0	0	0	0	0	0	0	0	0	0	0	0	0	0	0	0	0	0	0	0	0	0
Microbacterium_aurum	0	0	0	0	0.000178031	0.000246214	0.000448163	0	0	0.000894454	0	0	0	0	0	0	0	0	0.00546448	2.1509e-05	0	0	0	0	0	0	0	0	0	0.00141143	0	5.34064e-05	0	0	0.00085883	0	0	0	0.00151899	0	0	0	8.54513e-05	0	0	0	0	0	5.57491e-05
Microbacterium_azadirachtae	0	0	0	0	0	0	0	0	0	0	0	0	0	0	0	0	0	0	0	0	0	0	0	0	0	0	0	0	0	0	0	0	0	0	0	0	0	0	0	0	0	0	4.88293e-05	0	0	0	0	0	0
Microbacterium_foliorum	0	0	0	0	0	0.000492429	0	0	0	0.000383338	0	0	0	0	0	0	0	0	0	0	0	0	0	0	0	0	0	0	0	0	0	0	0	0	0.000214707	0	0	0	0	0	0	0	6.10366e-05	0	0	0	0	0	0
Microbacterium_hominis	0	0	0	0	0	0	0	0	0	0.000766675	0	0	0	0	0	0	0	0	0	0	0	0	0	0	0	0	0	0	0	0.00247001	0	0	0	0	0.000644122	0	0	0	0.000506329	0	0	0	6.10366e-05	0	0	1.47859e-05	0	0	0
Microbacterium_laevaniformans	0	0	0.00299401	0	0	0.000246214	0	0	0	0.000127779	0	0	0	1.95191e-05	0	0	0	0	0	0	0	0	0	0	0	0	0	0	0	0.00494001	3.65453e-05	0	0	0	0.000644122	0	0	0	0	0	0	0	0.000146488	0	0	0	0	0	0
Microbacterium_maritypicum	0	0	0	0	0.000356062	0.000615536	0.00059755	0	0	0	0	0	0	0	0	0	0	0	0	0	0	0	0	0	0	0	0	0	0	0	0	0	0	0	0	0	0	0	0.000337553	0	0	0	0.000317391	0	0	0	0	0	0
Microbacterium_oleivorans	0	0	0	0	0	0	0	0	0	0	0	0	0	0	0	0	0	0	0	0	0	0	0	0	0	0	0	0	0	0	0	0	0	0	0.000214707	0	0	0	0.000337553	0	0	0	2.44147e-05	0	0	0	0	0	0
Microbacterium_oxydans	0	0	0	0	0	0.000984858	0.00059755	0	0	0.000511117	0	0	0	0	0	0	0	0	0	4.3018e-06	0	0.000112549	0	0	0	0	0	0	0	0.000705716	0	0	0.000647459	4.8534e-06	0.000429415	0	0	0	0.000675105	0	0	0	0.000390635	0	0	0	0	0	5.57491e-05
Microbacterium_paraoxydans	0	0	0	0	0	0	0.000298775	0	0	0.000383338	0	0	0	0	0	0	0	0	0	0	0	0	0	0	0	0	0	0	0	0	0	0	0	0	0.00107354	0	0	0	0.000506329	0	0	0	6.10366e-05	0	0	0	0	0	5.57491e-05
Microbacterium_profundi	0	0	0	0	0.000356062	0.00123107	0.00134449	0	0	0	0	0	8.40506e-05	0	0	0	0	0	0	0	0	0	0	0	0	0	0	0	0	0	2.43635e-05	0	0	0	0	0	0	0	0.000337553	0	0	0	0.00126956	0	0	0	0	0	0.000111498
Microbacterium_pygmaeum	0	0	0	0	0	0	0	0	0	0	0	0	0	0	0	0	0	0	0	0	0	0	0	0	0	0	0	0	0	0.00105857	0	0	0	0	0	0	0	0	0.000337553	0	0	0	0	0	0	0	0	0	5.57491e-05
Microbacterium_resistens	0	0	0	0	0	0.000246214	0	0	0	0	0	0	0	0	0	0	0	0	0	0	0	0	0	0	0	0	0	0	0	0	0	0	0	0	0	0	0	0	0	0	0	0	2.44147e-05	0	0	0	0	0	0
Microbacterium_sediminis	0	0	0	0	0	0	0	0	0	0.000383338	0	0	0	0	0	0	0	0	0	0	0	0	0	0	0	0	0	0	0	0	0	0	0	0	0.0013956	0	0	0	0	0	0	0	0	0	0	0	0	0	0
Microbacterium_testaceum	0	0	0	0	0.000267046	0	0	0	0	0.00134168	0	0	0	0	0	0	0	0	0	4.3018e-06	0	0	0	0	0	0	0	0	0	0	0	0	0	0	0.00107354	0	0	0	0.00151899	0	0	0	2.44147e-05	0	0	0	0	0	0
Microbacterium_trichothecenolyticum	0	0	0	0	0	0.000246214	0	0	0	0	0	0	0	0	0	0	0	0	0	0	0	0	0	0	0	0	0	0	0	0	0	0	0	0	0	0	0	0	0	0	0	0	4.88293e-05	0	0	0	0	0	5.57491e-05
Microbulbifer_agarilyticus	0	0	0	0	0	0	0	0	0	0	0	0	0	0	0	0	0	0	0	0	0	0	0	0	0	0	0	0	0	0	0	0	0	0	0	0	0	0	0	0	0	0	2.44147e-05	0	0	0	0	0	0
Micrococcus_luteus	0	0	0.00299401	0	0	0.297919	0.00179265	0.00914077	0	0.00779453	0	0	0	7.80762e-05	0	1.3294e-05	0.00107991	0	0.00546448	0	0	0	0	0	0	0	0	0	0	0	0.000475088	0	0.000647459	0	0.0211487	0	0	0	0	0	0	0	0	0	0	0	0	0	0.0270941
Micrococcus_lylae	0	0	0	0	0	0	0.000448163	0	0.00276625	0.00274725	0	0.0175439	0	0	0	0	0	0	0	0	0	0	0	0	0	0	0	0	0	0	0	0	0	0	0	0	0	0	0.00472574	0	0	0	0	0.000133191	0	0	0.00110865	0	0.293742
Micrococcus_terreus	0	0	0	0	0	0.000246214	0.000298775	0	0.00276625	0.000383338	0	0	0	0	0	0	0	0	0.00546448	0	0	0	0	0	0	0	0	0	0	0.00105857	7.30905e-05	0	0.000647459	0	0.00450886	0.00300752	0	0	0.000675105	0	0	0	0	0	0	0	0	0	0.00045993
Microcystis_aeruginosa	0	0	0	0	0	0	0	0	0	0.000383338	0	0	0	0	0	0	0	0	0	0	0	0	0	0	0	0	0	0	0	0	0	0	0	0	0.000644122	0	0	0	0	0	0	0	0	0	0	0	0	0	0
Microlunatus_phosphovorus	0	0	0	0	0	0	0	0	0	0.000127779	0	0	0	0	0	0	0	0	0	0	0	0	0	0	0	0	0	0	0	0	0	0	0	0	0.000214707	0	0	0	0	0	0	0	2.44147e-05	0	0	0	0	0	0
Microlunatus_soli	0	0	0	0	0	0	0	0	0	0	0	0	0	0	0	0	0	0	0	0	0	0	0	0	0	0	0	0	0	0	0	0	0	0	0	0	0	0	0	0	0	0	0	0	0	0	0	0	0
Micromonospora_aurantiaca	0	0	0	0	0	0	0	0	0	0	0	0	0	0	0	0	0	0	0	0	0	0	0	0	0	0	0	0	0	0	0	0	0	0	0	0	0	0	0	0	0	0	2.44147e-05	0	0	0	0	0	0
Micromonospora_carbonacea	0	0	0	0	0	0	0	0	0	0	0	0	0	0	0	0	0	0	0	0	0	0	0	0	0	0	0	0	0	0	0	0	0	0	0	0	0	0	0	0	0	0	0	0	0	0	0	0	0
Microterricola_viridarii	0	0	0	0	0	0	0	0	0	0	0	0	0	0	0	0	0	0	0	0	0	0	0	0	0	0	0	0	0	0	0	0	0	0	0	0	0	0	0	0	0	0	0	0	0	0	0	0	0
Microvirga_flocculans	0	0	0	0	0	0.000246214	0	0	0	0	0	0	0	0	0	0	0	0	0	0	0	0	0	0	0	0	0	0	0	0	0	0	0	0	0.000429415	0	0	0	0	0	0	0	0	0	0	0	0	0	0
Millionella_massiliensis	0	0	0	0	0	0	0	0	0	0	0	0	0	0	0	0	0	0	0	0	0	0	0	0	0	0	0	0	0	0	0	0	0	4.8534e-06	0	0	0	0	0	0	0	0	0	0	0	0	0	0	0
Millisia_brevis	0	0	0	0	0	0	0	0	0	0.000127779	0	0	0	0	0	0	0	0	0	0	0	0	0	0	0	0	0	0	0	0	0	0	0	0	0	0	0	0	0	0	0	0	0	0	0	0	0	0	5.57491e-05
Mitsuaria_chitosanitabida	0	0	0	0	0	0.000861751	0	0	0	0.000127779	0	0	0	3.90381e-05	0	0	0	0	0	0	0	0	0	0	0	0	0	0	0	0.00211715	0	0	0	0	0	0	0	0	0	0	0	0	0	0	0	0	0	0	0
Mitsuokella_multacida	0	0	0	0	0	0	0	0	0	0	0	0	0	0	0	0	0	0	0	4.3018e-06	0	0	0	0	0	0	0	0	0	0	0	0	0	0	0	0	0	0	0	0	0	0	0	0	0	0	0	0	0
Mizugakiibacter_sediminis	0	0	0	0	0	0	0	0	0	0.000255558	0	0	0	0	0	0	0	0	0	0	0	0	0	0	0	0	0	0	0	0.00105857	0	0	0	0	0	0	0	0	0	0	0	0	0	0	0	0	0	0	0
Mobilibacterium_timonense	0	0	0	0	0	0	0	0	0	0	0	0	0	0	0	0	0	0	0	0	0	0	0	0	0	0	0	0	0	0	0	0	0	4.8534e-06	0	0	0	0	0	0	0	0	2.44147e-05	0	0	0	0	0	0
Mobilicoccus_pelagius	0	0	0	0	0	0	0	0	0	0	0	0	0	0	0	0	0	0	0	0	0	0	0	0	0	0	0	0	0	0	0	0	0	0	0	0	0	0	0	0	0	0	8.54513e-05	0	0	0	0	0	0
Mobiluncus_curtisii	0	0	0	0	0	0	0	0	0	0	0	0	0	0	0	0	0	0	0	4.3018e-06	0	0	0	0	0	0	0	0	0	0	2.43635e-05	0	0	0	0	0	0	0	0	0	0	0	0	0	0	0	0	0	0
Mobiluncus_mulieris	0	0	0	0	0	0	0	0	0	0	0	0	0	0	0	0	0	0	0	0	0	0	0	0	0	0	0	0	0	0	0	0	0	0	0	0	0	0	0	0	0	0	0	0	0	0	0	0	0
Modestobacter_marinus	0	0	0	0	0	0	0	0	0	0	0	0	0	0	0	0	0	0	0	0	0	0	0	0	0	0	0	0	0	0	0	0	0	0	0	0	0	0	0	0	0	0	0	0	0	0	0	0	0
Mogibacterium_timidum	0.00118906	0	0	0	0.000356062	0	0.000298775	0	0	0	0.0165386	0	0	0	0	0.00271197	0.00107991	0	0.0491803	0.000227995	0	0	0	0	0	0	0.000643518	0	0.000107724	0.00176429	0.000560361	5.34064e-05	0	0.000322751	0	0	0	0	0.000675105	0.000799543	0	0	0	0.000133191	0	1.47859e-05	0	0	0
Moheibacter_sediminis	0	0	0	0	0	0	0	0	0	0.000127779	0	0	0	0	0	0	0	0	0	0	0	0	0	0	0	0	0	0	0	0	0	0	0	0	0	0	0	0	0.000337553	0	0	0	0	0	0	0	0	0	0
Monashia_flava	0	0	0	0	0	0	0	0	0	0	0	0	0	0	0	0	0	0	0	0	0	0	0	0	0	0	0	0	0	0	0	0	0	0	0	0	0	0	0	0	0	0	0	0	0	0	0	0	0
Moraxella_atlantae	0	0	0	0	0.000178031	0	0.000448163	0	0	0.000255558	0	0	0	0	0	0	0	0	0	0	0	0	0	0	0	0	0	0	0	0.00105857	0	0	0	0	0.000644122	0	0	0	0.000337553	0	0	0	2.44147e-05	0	0	0	0	0	0
Moraxella_catarrhalis	0	0	0	0	0	0	0	0	0	0.000511117	0	0	0	0	0	1.3294e-05	0	0	0	0	0	0	0	0	0	0	0	0	0	0	0	0	0	0.000177149	0	0	0	0	0	0	0	0	0	0	0	0	0	0	0
Moraxella_lincolnii	0	0	0	0	0	0	0	0	0	0	0	0	0	0	0	0	0	0	0	0	0	0	0	0	0	0	0	0	0	0	0	0	0	0	0	0	0	0	0	0	0	0	0	0	0	0	0	0	0
Moraxella_nonliquefaciens	0	0	0	0	0	0	0	0	0	0	0	0	0	0	0	0	0	0	0	0	0	0	0	0	0	0	0	0	0	0	2.43635e-05	0	0	4.8534e-06	0.000429415	0	0	0	0	0	0	0	0	0	0	0	0	0	0
Moraxella_osloensis	0	0	0	0	0	0	0	0	0	0	0	0	0	0	0	0	0	0	0	0	0	0	0	0.00132626	0	0	0	0	0	0	0	0	0	0	0	0	0	0	0	0	0	0	0	0	0	0	0	0	0.016669
Moraxella_porci	0	0	0	0	0	0	0	0	0	0	0	0	0	0	0	0	0	0	0	0	0	0.000112549	0	0	0	0	0	0	0	0	0	0	0	0	0	0	0	0	0	0	0	0	0	0	0	0	0	0	0
Morganella_morganii	0	0	0	0	0	0	0	0	0	0	0	0	0	0	0	1.3294e-05	0	0	0	0	0.00104712	0	0	0	0	0	0	0	0	0	0	0	0	0	0	0	0	0	0.000337553	0	0	0	0	0	0	0	0	0	0
Morganella_psychrotolerans	0	0	0	0	0	0	0	0	0	0	0	0	0	0	0	0	0	0	0	0	0	0	0	0	0	0	0	0	0	0	0	0	0	0	0	0	0	0	0	0	0	0	0	0	0	0	0	0	0
Moritella_dasanensis	0	0	0	0	0	0	0	0	0	0	0	0	0	0	0	0	0	0	0	0	0	0	0	0	0	0	0	0	0	0	0	0	0	0	0	0	0	0	0	0	0	0	0	0	0	0	0	0	0
Morococcus_cerebrosus	0	0.00110446	0	0	0	0	0.000298775	0	0	0.000127779	0	0	0	0	0	0.00156869	0	0	0	0	0	0	0	0	0	0	0.000294946	0	0	0	0	0	0	3.88272e-05	0	0	0	0	0	0	0	0	0	0	0	0	0	0	0
Mucilaginibacter_gossypiicola	0	0	0	0	0	0	0.000298775	0	0	0.000894454	0	0	0	0	0	0	0	0	0	0	0	0	0	0	0	0	0	0	0	0	0	0	0	0	0	0	0	0	0.000337553	0	0	0	0	0	0	0	0	0	0
Mucor_circinelloides	0	0	0	0	0	0	0	0	0	0	0	0	0	0	0	0	0	0	0	0	0	0	0	0	0	0	0	0	0	0	0	0	0	0	0	0	0	0	0	0	0	0	0	0	0	0	0	0	0
Murdochiella_massiliensis	0	0	0	0	0	0	0	0	0	0	0	0	0	0	0	0	0	0	0	0	0	0	0	0	0	0	0	0	0	0	0	0	0	0	0	0	0	0	0	0	0	0	0	0	0	0	0	0	0
Muribaculum_intestinale	0	0	0	0	0	0	0	0	0	0	0	0	0	0	0	0	0	0	0	0	0	0	0	0	0	0	0	0	0	0	0	0	0	0	0	0	0	0	0	0	0	0	0	0	0	0	0	0	0
Muricauda_ruestringensis	0	0	0	0	0	0	0	0	0	0	0	0	0	0	0	0	0	0	0	0	0	0	0	0	0	0	0	0	0	0	0	0	0	0	0	0	0	0	0	0	0	0	0	0	0	0	0	0	0
Mycetocola_miduiensis	0	0	0	0	0	0	0	0	0	0	0	0	0	0	0	0	0	0	0	0	0	0	0	0	0	0	0	0	0	0	0	0	0	0	0	0	0	0	0	0	0	0	0	0	0	0	0	0	0
Mycobacterium_abscessus	0.0380499	0.00703366	0	0	0	0	0	0	0	0	0	0	0	1.95191e-05	0	0.000757757	0	0	0	8.60359e-06	0	0	0	0	0	0.0207167	0.000187693	0.0196684	0.000377033	0	0.00142526	0	0	0.000526594	0	0	0	0.208076	0.0153586	0.00148487	0.012939	0.0197628	8.54513e-05	0	0	0.00032529	0	0	5.57491e-05
Mycobacterium_acapulcensis	0	0	0	0	0	0	0	0	0	0	0	0	0	0	0	0	0	0	0	0	0	0	0	0	0	0	0	0	0	0	0	0	0	0	0	0	0	0	0	0	0	0	0	0	0	0	0	0	0
Mycobacterium_agri	0	0	0	0	0	0	0	0	0	0	0	0	0	0	0	0	0	0	0	0	0	0	0	0	0	0	0	0	0	0	0	0	0	0	0	0	0	0	0	0	0	0	0	0	0	0	0	0	0
Mycobacterium_arupense	0	0	0	0	0	0.000246214	0	0	0	0	0	0	0	1.95191e-05	0	0	0	0	0	3.01126e-05	0	0.000112549	0	0	0	0	0	0	0	0	6.09088e-05	0	0	0	0	0.00300752	0	0	0.00118143	0	0	0	0	0	0	0	0	0	0
Mycobacterium_asiaticum	0	0	0	0	0	0	0	0	0	0	0	0	0	0	0	0	0	0	0	0	0	0	0	0	0	0	0	0	0	0	0	0	0	0	0	0	0	0	0	0	0	0	0	0	0	0	0	0	0
Mycobacterium_aurum	0	0	0	0	0	0	0.000448163	0	0	0.000127779	0	0	0	0	0	0	0	0	0	8.60359e-06	0	0	0	0	0	0	0	0	0	0	0	0	0	0	0	0	0	0	0	0	0	0	0	0	0	0	0	0	0
Mycobacterium_avium	0	0	0	0	0	0	0	0	0	0	0	0	0	0	0	0	0	0	0	8.60359e-06	0	0	0	0	0	0	0	0	0	0	2.43635e-05	0	0	0	0	0	0	0	0	0	0	0	0	0	0	0	0	0	0
Mycobacterium_bacteremicum	0	0	0	0	0	0	0	0	0	0	0	0	0	1.95191e-05	0	0	0	0	0	8.60359e-06	0	0	0	0	0	0	0	2.87886e-05	0	0	6.09088e-05	0	0	0	0	0	0	0.00164813	0	0	0	0	6.10366e-05	0	0	0	0.000554324	0	5.57491e-05
Mycobacterium_bohemicum	0	0	0	0	0	0	0	0	0	0	0	0	0	0	0	0	0	0	0	0	0	0	0	0	0	0	0	0	0	0.000705716	0	3.56043e-05	0	0	0	0	0	0	0	0	0	0	0	0	0	0	0	0	0
Mycobacterium_brisbanense	0	0	0	0	0	0	0	0	0	0	0	0	0	0	0	0	0	0	0	0	0	0	0	0	0	0	0	0	0	0	0	0	0	0	0	0	0	0	0	0	0	0	0	0	0	0	0	0	0
Mycobacterium_brumae	0	0	0	0	0	0	0	0	0	0.000255558	0	0	0	0	0	0	0	0.00683413	0	0	0	0	0	0	0	0	0	0	0	0	0	0	0	0	0	0	0	0	0.000506329	0	0	0	0	0	0	0	0	0	0
Mycobacterium_celeriflavum	0	0	0	0	0	0	0	0	0	0	0	0	0	0	0	0	0	0	0	4.3018e-06	0	0	0	0	0	0	0	0	0	0	0	0	0	0	0	0	0	0	0	0	0	0	0	0	0	0	0	0	0
Mycobacterium_chelonae	0.00118906	0.000406906	0	0.0168067	0	0	0.000298775	0	0	0.000127779	0	0	0	0	0	0	0	0	0.00546448	8.60359e-06	0	0.000112549	0	0	0	0	0	0	0.000107724	0	0.000109636	0	0	7.2801e-06	0.000429415	0.00300752	0	0.00576844	0	0	0	0	0	0	0	2.95718e-05	0	0	5.57491e-05
Mycobacterium_chimaera	0	0	0	0	0	0	0	0	0	0	0	0	0	0	0	0	0	0	0	0	0	0	0	0	0	0	0	0	0	0	0	0	0	0	0	0	0	0	0	0	0	0	0	0	0	0	0	0	0
Mycobacterium_chlorophenolicum	0.00118906	0	0	0	0	0	0	0	0	0.000255558	0	0	0	0	0	0	0	0	0	4.3018e-06	0	0	0	0	0	0	0	0	0	0	0	0	0	0	0.000429415	0	0	0	0	0	0	0	0	0	0	0	0	0	0
Mycobacterium_colombiense	0	0	0	0	0	0	0	0	0	0	0	0	0	0	0	0	0	0	0.00546448	0	0	0	0	0	0	0	0	0	0	0	2.43635e-05	0	0	0	0	0	0	0	0	0	0	0	0	0	0	0	0	0	0
Mycobacterium_conceptionense	0	0	0	0	0	0.000246214	0	0	0	0	0	0	0	0	0	0	0	0	0	0	0	0	0	0	0	0	0	0	0	0	0	0	0	0	0	0	0	0	0.000337553	0	0	0	0	0	0	0	0	0	0
Mycobacterium_conspicuum	0	0	0	0	0	0	0	0	0	0	0	0	0	0	0	0	0	0	0	4.3018e-06	0	0	0	0	0	0	0	0	0	0	0	0	0	0	0	0	0	0	0	0	0	0	0	0	0	0	0	0	0
Mycobacterium_cosmeticum	0	0	0	0	0	0	0	0	0	0	0	0	0	0	0	0	0	0	0	8.60359e-06	0	0	0	0	0	0	0	0	0	0	0	0	0	0	0.000214707	0	0	0	0	0	0	0	0	0	0	0	0	0	5.57491e-05
Mycobacterium_diernhoferi	0	0	0	0	0	0	0	0	0	0	0	0	0	0	0	0	0	0	0	8.60359e-06	0	0	0	0	0	0	0	0	0	0	0	3.56043e-05	0	0	0	0	0	0	0.000337553	0	0	0	0	0	0	0	0	0	0
Mycobacterium_doricum	0	0.000116259	0.00299401	0	0	0	0	0	0	0.000511117	0	0	0	0	0	0	0	0	0	8.60359e-06	0	0	0	0	0	0	0	0	0	0	0	0	0	0	0	0.00300752	0	0	0	0	0	0	4.88293e-05	0	0	0	0	0	0
Mycobacterium_elephantis	0	0	0	0	0	0	0	0	0	0	0	0	0	0	0	0	0	0	0	0	0	0	0	0	0	0	0	0	0	0	0	0	0	0	0	0	0	0	0	0	0	0	0	0	0	0	0	0	0
Mycobacterium_europaeum	0	0	0	0	0	0	0	0	0	0.000255558	0	0	0	0	0	0	0	0	0	0	0	0	0	0	0	0	0	0	0	0	0	0	0	0	0	0	0	0	0	0	0	0	0	0	0	0	0	0	0
Mycobacterium_fallax	0	0	0	0	0	0	0	0	0	0	0	0	0	0	0	0	0	0	0	0	0	0	0	0	0	0	0	0	0	0	0	0	0	0	0	0	0	0	0	0	0	0	0	0	0	0	0	0	0
Mycobacterium_flavescens	0	0	0	0	0	0	0	0	0	0.000127779	0	0	0	0	0	0	0	0	0	0	0	0	0	0	0	0	0	0	0	0	0	0	0	0	0	0	0	0	0	0	0	0	0	0	0	0	0	0	0
Mycobacterium_fortuitum	0	0	0	0	0	0	0	0	0	0	0	0	0	0	0	0	0	0	0	0	0	0	0	0	0	0	0	0	0	0	0	0	0	0	0	0	0	0	0	0	0	0	2.44147e-05	0	0	0	0	0	0
Mycobacterium_fragae	0	0	0	0	0	0	0	0	0	0	0	0	0	0	0	0	0	0	0	0	0	0	0	0	0	0	0	0	0	0	0	0	0	0	0.000214707	0	0	0	0	0	0	0	0	0	0	0	0	0	0
Mycobacterium_franklinii	0	0	0	0	0	0	0	0	0	0	0	0	0	0	0	0	0	0	0	0	0	0	0	0	0	0	0	1.15154e-05	0	0	0	0	0	0	0	0	0	0	0	0	0	0	0	0	0	0	0	0	0
Mycobacterium_frederiksbergense	0	0	0	0	0	0	0	0	0	0	0	0	0	0	0	0	0	0	0	0	0	0	0	0	0	0	0	0	0	0	0	0	0	0	0	0	0	0	0	0	0	0	0	0	0	0	0	0	0
Mycobacterium_gadium	0	0	0	0	0	0	0	0	0	0	0	0	0	0	0	0	0	0	0	0	0	0	0	0	0	0	0	0	0	0	0	0	0	0	0	0	0	0	0	0	0	0	0	0	0	0	0	0	0
Mycobacterium_gastri	0	0	0	0	0	0	0	0	0	0	0	0	0	0	0	0	0	0	0	0	0	0	0	0	0	0	0	0	0	0	0	0	0	0	0	0	0	0	0	0	0	0	2.44147e-05	0	0	0	0	0	0
Mycobacterium_gilvum	0	0	0	0	0	0.000615536	0	0.00548446	0	0.000255558	0	0	0	0	0	1.3294e-05	0	0	0	8.60359e-06	0	0	0	0	0	0	0	0	0	0	2.43635e-05	0	0	0	0.000214707	0	0	0	0	0	0	0	8.54513e-05	0	0	0	0.000554324	0	0
Mycobacterium_goodii	0	0	0	0	0	0	0	0	0	0	0	0	0	0	0	0	0	0	0	0	0	0	0	0	0	0	0	0	0	0	0	0	0	0	0	0	0	0	0	0	0	0	0	0	0	0	0	0	0
Mycobacterium_gordonae	0	0	0.00299401	0.0168067	0.000178031	0	0	0	0	0	0	0	1.68101e-05	9.75953e-05	0	2.6588e-05	0.00107991	0	0.00546448	1.72072e-05	0	0.000112549	0	0	0	0	0	0	0	0	3.65453e-05	0	0	0	0.000644122	0	0	0	0.00118143	0	0.000924214	0	2.44147e-05	0	0	0	0.000554324	0	0
Mycobacterium_grossiae	0	0	0	0	0	0	0	0	0	0.000255558	0	0	0	0	0	0	0	0	0	3.44144e-05	0	0.000112549	0	0	0	0	5.36265e-05	0	0	0	3.65453e-05	0	0	0	0.000214707	0	0	0	0	0	0	0	2.44147e-05	0	0	0	0.000554324	0	0
Mycobacterium_hassiacum	0	0	0	0	0	0	0	0	0	0	0	0	0	0	0	0	0	0	0	0	0	0	0	0	0	0	0	0	0	0	0	0	0	0	0	0	0	0	0.000337553	0	0	0	0	0	0	0	0	0	0
Mycobacterium_heckeshornense	0	0	0	0	0	0	0	0	0	0	0	0	0	0	0	0	0	0	0	0	0	0	0	0	0	0	0	0	0	0	0	0	0	0	0	0	0	0	0	0	0	0	0	0	0	0	0	0	0
Mycobacterium_holsaticum	0	0	0	0	0	0	0	0	0	0	0	0	0	0	0	0	0	0	0	0	0	0	0	0	0	0	0	0	0	0	0	0	0	0	0	0	0	0	0	0	0	0	2.44147e-05	0	0	0	0	0	0
Mycobacterium_immunogenum	0	0	0	0	0	0	0	0	0	0	0	0	0	1.95191e-05	0	0	0	0	0	0	0	0	0	0	0	0	0	7.48503e-05	0	0	0	0	0	4.8534e-06	0	0	0	0.00247219	0	0.00011422	0.00138632	0	0	0	0.016129	0	0	0	0
Mycobacterium_insubricum	0	0	0	0	0	0	0	0	0	0	0	0	0	0	0	0	0	0	0	0	0	0	0	0	0	0	0	0	0	0	0	0	0	0	0	0	0	0	0	0	0	0	0	0	0	0	0	0	5.57491e-05
Mycobacterium_iranicum	0	0	0.00299401	0	0	0.000492429	0.000298775	0	0	0.00108612	0	0	0	0	0	0	0	0	0	4.3018e-06	0	0	0	0	0	0	0	1.15154e-05	0.000215448	0.0194072	0.000170545	0	0	0	0.000429415	0	0	0	0.000506329	0	0	0	4.88293e-05	0	0	0	0.000554324	0	0.000250871
Mycobacterium_kansasii	0	0	0	0	0	0	0	0	0	0	0	0	0	0	0	0	0	0	0	0	0	0	0	0	0	0	0	0	0	0	0	0	0	0	0	0	0	0	0	0	0	0	0	0	0	0	0	0	0
Mycobacterium_komaniense	0	0	0	0	0	0	0	0	0	0	0	0	0	0	0	0	0	0	0	0	0	0	0	0	0	0	0	0	0	0	0	0	0	0	0	0	0	0	0.000337553	0	0	0	0	0	0	0	0	0	0
Mycobacterium_kubicae	0	0	0	0	0	0	0	0	0	0	0	0	0	0	0	0	0	0	0	0	0	0	0	0	0	0	0	0	0	0	0	0	0	0	0	0	0	0	0	0	0	0	0	0	0	0	0	0	0
Mycobacterium_kumamotonense	0	0	0	0	0	0	0	0	0	0.000127779	0	0	0	0	0	0	0	0	0	0	0	0	0	0	0	0	0	0	0	0	0	0	0	0	0	0	0	0	0	0	0	0	0	0	0	0	0	0	0
Mycobacterium_lentiflavum	0	0	0	0	0	0	0.000298775	0	0	0	0	0	0	0	0	0	0	0	0	0	0	0	0	0	0	0	0	0	0	0	0	0	0	0	0.000214707	0	0	0	0	0	0	0	0	0	0	0	0	0	0
Mycobacterium_lepromatosis	0	0	0	0	0	0	0	0	0	0	0	0	0	0	0	0	0	0	0	0	0	0	0	0	0	0	0	0	0	0	0	0	0	0	0	0	0	0	0	0	0	0	0	0	0	0	0	0	0
Mycobacterium_llatzerense	0	0	0.00299401	0.0168067	0.000178031	0.000492429	0.000298775	0	0	0.0012139	0	0	0	1.95191e-05	0	0	0	0	0	1.72072e-05	0	0.000112549	0	0	0	0	0	0	0.000107724	0.000705716	0	0	0	0	0.00107354	0.00300752	0	0	0	0	0.00138632	0	2.44147e-05	0	0	0	0	0.000518941	0
Mycobacterium_mucogenicum	0	0.000116259	0	0	0	0.00209282	0.0011951	0	0	0.00300281	0	0	0	1.95191e-05	0	2.6588e-05	0.00107991	0	0.010929	6.02252e-05	0	0.000112549	0	0	0	0	0	2.87886e-05	0	0.00247001	9.7454e-05	0	0.000971188	0	0.0104133	0	0	0.000824063	0.00810127	0	0	0.0118577	0	0	0	0	0	0.000518941	0.000209059
Mycobacterium_nebraskense	0	0	0	0	0	0	0	0	0	0	0	0	0	0	0	0	0	0	0	0	0	0	0	0	0	0	0	0	0	0	0	0	0	0	0.000214707	0	0	0	0	0	0	0	0	0	0	0	0	0	0
Mycobacterium_neoaurum	0	0	0	0	0	0	0	0	0	0.000127779	0	0	0	0	0	0	0	0	0	0	0	0	0	0	0	0	0	0	0.000107724	0	0	0	0	0	0.000214707	0	0	0	0	0	0	0	0.000158695	0	0	0	0	0	0
Mycobacterium_obuense	0	0	0	0	0	0.000246214	0	0	0	0	0	0	0	3.90381e-05	0	0	0	0	0	0	0	0	0	0	0	0	0	0	0	0	0.000170545	0	0	0	0	0	0	0	0.000337553	0	0	0	0	0	0	0	0	0	0
Mycobacterium_parafortuitum	0	0	0	0	0	0	0	0	0	0	0	0	0	0	0	0	0	0	0	0	0	0	0	0	0	0	0	0	0	0	0	0	0	0	0	0	0	0	0	0	0	0	0	0	0	0	0	0	0
Mycobacterium_peregrinum	0	0	0	0	0	0	0	0	0	0	0	0	0	0	0	0	0.00107991	0	0	0	0	0	0	0	0	0	0	0	0	0	0	0	0	0	0	0	0	0	0	0	0	0	0	0	0	0	0	0	0
Mycobacterium_phlei	0	0	0	0	0	0	0	0	0	0	0	0	0	0	0	0	0	0	0	0	0	0	0	0	0	0	0	0	0	0	0	0	0	0	0	0	0	0	0	0	0	0	0	0	0	0	0	0	0
Mycobacterium_phocaicum	0	0	0	0	0	0	0	0	0	0	0	0	0	0	0	0	0	0	0	0	0	0	0	0.000884173	0	0	0	0	0	0	0	0	0	0	0	0	0	0	0	0	0	0	0	0	0	0	0	0	0
Mycobacterium_rhodesiae	0	0	0	0	0	0	0.000298775	0	0	0	0	0	0	0	0	0	0	0	0	0	0	0	0	0	0	0	0	0	0	0	0	0	0	0	0	0	0	0	0.000506329	0	0	0	0	0	0	0	0	0	0
Mycobacterium_scrofulaceum	0	0	0	0	0	0	0	0	0	0	0	0	0	0	0	0	0	0	0	0	0	0	0	0	0	0	0	0	0	0	0	0	0	0	0	0	0	0	0	0	0	0	0	0	0	0	0	0	5.57491e-05
Mycobacterium_septicum	0	0	0	0	0	0	0	0	0	0	0	0	0	0	0	0	0	0	0	0	0	0	0	0	0	0	0	0	0	0.00105857	0	0	0	0	0.000214707	0	0	0	0	0	0	0	0	0	0	0	0	0	0
Mycobacterium_sherrisii	0	0	0	0	0	0	0	0	0	0	0	0	0	0	0	0	0	0	0	4.3018e-06	0	0	0	0	0	0	0	0	0	0	0	0	0	0	0	0	0	0	0	0	0	0	0	0	0	0	0	0	0
Mycobacterium_shimoidei	0	0	0	0	0	0	0	0	0	0	0	0	0	0	0	0	0	0	0	0	0	0	0	0	0	0	0	0	0	0	0	0	0	0	0	0	0	0	0	0	0	0	0	0	0	0	0	0	0
Mycobacterium_smegmatis	0	0	0	0	0	0	0	0	0	0	0	0	0	0	0	0	0	0	0	8.60359e-06	0	0	0	0	0	0	0	0	0	0	2.43635e-05	0	0	0	0.000429415	0	0	0	0	0	0.00138632	0	2.44147e-05	0	0	0	0	0	0.00015331
Mycobacterium_syngnathidarum	0	0	0	0	0	0	0	0	0	0	0	0	0	0	0	0	0	0	0	0	0	0	0	0	0	0	0	0	0	0	0	0	0	0	0	0	0	0	0	0	0	0	0	0	0	0	0	0	0
Mycobacterium_szulgai	0	0	0	0	0	0	0	0	0	0	0	0	0	0	0	0	0	0	0	0	0	0	0	0	0	0	0	0	0	0	0	0	0	0	0	0	0	0	0	0	0	0	0	0	0	0	0	0	0
Mycobacterium_triplex	0	0	0	0	0	0	0	0	0	0	0	0	0	0	0	0	0	0	0	0	0	0	0	0	0	0	0	0	0	0	0	0	0	0	0	0	0	0	0	0	0	0	2.44147e-05	0	0	0	0	0	0
Mycobacterium_tuberculosis	0	0	0	0	0	0	0	0	0	0	0	0	0	0	0	0	0	0	0.00546448	0	0	0	0	0	0	0	0	0	0	0	0	0	0	0	0	0	0	0	0.000337553	0	0	0	0	0	0	0	0	0	0
Mycobacterium_wolinskyi	0	0	0	0	0	0	0	0	0	0	0	0	0	0	0	0	0	0	0	0	0	0	0	0	0	0	0	0	0	0	2.43635e-05	0	0	0	0	0	0	0	0	0	0	0	0	0	0	0	0	0	0
Mycobacterium_xenopi	0	0	0	0	0	0	0	0	0	0	0	0	0	0	0	0	0	0	0	0	0	0	0	0	0	0	0	0	0	0	0	0	0	0	0	0	0	0	0	0	0	0	0	0	0	0	0	0	0
Mycolicibacter_longobardus	0	0	0	0	0	0.000246214	0	0	0	0	0	0	0	0	0	0	0	0	0	0	0	0	0	0	0	0	0	0	0	0	0	0	0	0	0	0	0	0	0	0	0	0	0	0	0	0	0	0	0
Mycolicibacter_terrae	0	0	0	0	0	0	0	0	0	0	0	0	0	0	0	0	0	0	0	4.3018e-06	0	0	0	0	0	0	0	0	0	0	0	0	0	0	0	0	0	0	0	0	0	0	0	0	0	0	0	0	0
Mycoplasma_agalactiae	0	0	0	0	0	0	0	0	0	0	0	0	0	0	0	0	0	0	0	0	0	0	0	0	0	0	0	0	0	0	0	0	0	0	0	0	0	0	0	0	0	0	0	0	0	0	0	0	0
Mycoplasma_arthritidis	0	0	0	0	0	0.000246214	0	0	0	0	0	0	0	0	0	0	0	0	0	0	0	0	0	0	0	0	0	0	0	0	0	0	0	0	0	0	0	0	0	0	0	0	0	0	0	0	0	0	0
Mycoplasma_fermentans	0	0	0	0	0.000178031	0	0	0	0	0	0	0	0	0	0	0	0	0	0	0	0	0	0	0	0	0	0	0	0	0	0	0	0	0	0	0	0	0	0	0	0	0	0	0	0	0	0	0	0
Mycoplasma_hominis	0	0	0	0	0	0	0	0	0	0	0	0	0	0	0	0	0	0	0	0	0	0	0	0	0	0	0	0	0	0	0	0	0	0	0	0	0	0	0	0	0	0	0	0	0	0	0	0	0
Mycoplasma_hyopneumoniae	0	0	0	0	0	0	0	0	0	0	0	0	0	0	0	0	0	0	0	0	0	0	0	0	0	0	0	0	0	0	0	0	0	0	0	0	0	0	0	0	0	0	2.44147e-05	0	0	0	0	0	0
Mycoplasma_mobile	0	0	0	0	0	0	0	0	0	0	0	0	0	0	0	0	0	0	0	0	0	0	0	0	0	0	0	0	0	0	0	0	0	0	0	0	0	0	0	0	0	0	0	0	0	0	0	0	0
Mycoplasma_orale	0	0	0	0	0.116343	0	0	0	0	0	0.0160177	0	0	0	0	0.000186116	0	0	0.00546448	0	0	0	0	0	0	0	0	0	0	0	0	0	0	0	0	0	0	0	0	0	0	0	0	0	0	2.95718e-05	0	0	0
Mycoplasma_pneumoniae	0	0	0	0	0	0	0	0	0	0	0	0	0	0	0	0	0	0	0	0	0	0	0	0	0	0	0	0	0	0	0	0	0	0	0	0	0	0	0	0	0	0	0	0	0	0	0	0	0
Mycoplasma_synoviae	0	0	0	0	0	0	0	0	0	0	0	0	0	0	0	0	0	0	0	0	0	0	0	0	0	0	0	0	0	0	0	0	0	0	0	0	0	0	0	0	0	0	0	0	0	0	0	0	0
Mycoplasma_wenyonii	0	0	0	0	0	0	0	0	0	0	0	0	0	0	0	0	0	0	0	0	0	0	0	0.00928382	0	0	0	0	0	0	0	0	0	0	0	0	0	0	0	0	0	0	0	0	0	0	0	0	0
Myroides_injenensis	0	0	0	0	0	0	0	0	0	0	0	0	0	0	0	0	0	0	0	0	0	0	0	0	0	0	0	0	0	0	0	0	0	0	0	0	0	0	0	0	0	0	0	0	0	0	0	0	0
Myroides_odoratimimus	0	0	0	0	0	0	0	0	0	0.000383338	0	0	0	0	0	0	0	0	0	0	0	0	0	0	0	0	0	0	0	0	0	0	0	0	0	0	0	0	0	0	0	0	0	0	0	0	0	0	0
Myroides_odoratus	0	0	0	0	0	0	0	0	0	0.000127779	0	0	0	0	0	0	0	0	0	0	0	0	0	0	0	0	0	0	0	0	0	0	0	0	0	0	0	0	0	0	0	0	0	0	0	0	0	0	0
Myxococcus_fulvus	0	0	0	0	0	0	0	0	0	0	0	0	0	0	0	0	0	0	0	0	0	0	0	0	0	0	0	0	0	0	0	0	0	0	0	0	0	0	0	0	0	0	0	0	0	0	0	0	0
Myxococcus_xanthus	0	0	0	0	0	0	0	0	0	0	0	0	0	0	0	0	0	0	0.00546448	0	0	0	0	0	0	0	0	0	0	0	0	0	0	0	0	0	0	0	0	0	0	0	0	0	0	0	0	0	0
Naegleria_fowleri	0.00118906	0	0	0	0	0.000246214	0.000298775	0.00548446	0	0	0	0	1.68101e-05	0	0	0	0	0	0	0	0	0	0	0	0	0	0	0	0	0	0	3.56043e-05	0	4.8534e-06	0	0	0	0	0	0	0	0	0	0.000133191	0	0	0.000554324	0	0
Naganishia_albida	0	0	0	0	0	0	0	0	0	0	0	0	0	0	0	0	0	0	0	0	0	0	0	0	0	0	0	0	0	0	0	0	0	0	0.000214707	0	0	0	0	0	0	0	0	0	0	0	0	0	0
Nakamurella_multipartita	0	0	0	0	0	0	0	0	0	0.000255558	0	0	0	0	0	0	0	0	0	0	0	0	0	0	0	0	0	0	0	0	3.65453e-05	0	0	0	0	0	0	0	0	0	0	0	2.44147e-05	0	0	0	0	0	5.57491e-05
Natronococcus_occultus	0	0	0	0	0	0	0	0	0	0	0	0	0	0	0	0	0	0	0	0	0	0	0	0	0	0	0	0	0	0	0	0	0	0	0.000214707	0	0	0	0	0	0	0	0	0	0	0	0	0	0
Necator_americanus	0	0	0	0	0	0.000492429	0.000298775	0	0	0	0	0	0	0	0	0	0	0	0	0	0	0	0	0	0	0	0	0	0.000107724	0	0	0	0	0	0.000644122	0	0	0	0	0	0	0	2.44147e-05	0	0	0	0	0	0.000111498
Nectria_haematococca	0	0	0	0	0	0	0	0	0	0	0	0	0	0	0	0	0	0	0	0	0	0	0	0	0	0	0	0	0	0	0	0	0	0	0	0	0	0	0	0	0	0	0	0	0	0	0	0	0
Neisseria_animaloris	0	0	0	0	0	0	0	0	0	0	0	0	0	0	0	0	0	0	0	0	0	0	0	0	0	0	0	0	0	0	0	0	0	7.2801e-06	0	0	0	0	0	0	0	0	0	0	0	0	0	0	0
Neisseria_bacilliformis	0	0	0	0	0	0	0	0	0	0	0	0	0	0	0	2.6588e-05	0.00107991	0	0	0	0	0	0	0.0066313	0	0	0	0	0	0	0	3.56043e-05	0	0.000150455	0	0	0	0	0	0	0	0	0	0	0	1.47859e-05	0	0	0
Neisseria_canis	0	0	0	0	0	0	0	0	0	0	0	0	0	0	0	0	0	0	0	0	0	0	0	0	0	0	0	0	0	0	0	0	0	7.2801e-06	0	0	0	0	0	0	0	0	0	0	0	0	0	0	0
Neisseria_cinerea	0	0	0	0	0	0	0	0	0	0.000127779	0	0	0	0	0	0.000691287	0.00107991	0	0	0	0	0	0	0	0	0	0	0	0.000269309	0	0	0	0	0.000410113	0	0	0	0	0	0	0	0	0	0	0	0	0	0	0
Neisseria_elongata	0	0.000406906	0	0	0	0	0	0	0	0.00364171	0.00117203	0	0	0	0	0.0092792	0.00323974	0	0.010929	0	0	0	0	0.000884173	0	0.00111982	0	2.30309e-05	0	0.00176429	2.43635e-05	0	0	0.149303	0.000214707	0	0	0	0.000506329	0	0	0	0	0.000133191	0	0.00479802	0	0	5.57491e-05
Neisseria_flavescens	0.00237812	0	0	0	0	0	0	0	0	0.000127779	0	0	0	0	0	0.0035362	0.00107991	0	0	0	0	0	0	0	0	0	0	0	0	0	0	0	0	0.000215976	0	0	0	0	0	0	0	0	0	0	0	1.47859e-05	0	0	0
Neisseria_gonorrhoeae	0	0	0	0	0	0	0.000298775	0	0	0	0	0	0	0	0	1.3294e-05	0	0	0	0	0	0	0	0	0	0	0	0	0	0	0	0	0	8.9788e-05	0	0	0	0	0	0	0	0	0	0	0	0	0	0.000518941	0
Neisseria_lactamica	0	0	0	0	0	0	0	0	0	0	0	0	0	0	0	0.000358938	0	0	0	0	0	0	0	0	0	0	5.36265e-05	0	0	0	0	0	0	0.000138322	0	0	0	0	0	0	0	0	0	0	0	0	0	0	0
Neisseria_macacae	0	0.0155205	0.00299401	0	0	0	0	0	0	0.000638896	0	0	0	0	0	0.000239292	0	0	0	0	0	0	0	0	0	0	0.000107253	0	0	0	0	0	0	0.000155309	0	0	0	0	0	0	0	0	0	0	0	0	0	0	0
Neisseria_meningitidis	0	0	0	0	0	0	0	0	0	0	0	0	0	0	0	0	0	0	0	0	0	0	0	0	0	0	0	0	0	0	0	0	0	0	0	0	0	0	0	0	0	0	0	0	0	0	0	0	0
Neisseria_mucosa	0	0.00703366	0	0	0	0	0	0	0	0.000127779	0	0	0	0	0	0.000624817	0	0	0	0	0	0	0	0	0	0	0.000134066	0	0	0	2.43635e-05	0	0	0.000237817	0	0	0	0	0	0.00011422	0	0	8.54513e-05	0	0	1.47859e-05	0	0	0
Neisseria_perflava	0	0	0	0	0	0	0	0	0	0	0	0	0	0	0	0.000744463	0	0	0	0	0	0	0	0	0.05	0	0	0	0	0.000705716	0	0	0	3.15471e-05	0	0	0	0	0	0	0	0	0	0	0	0	0	0	0
Neisseria_polysaccharea	0	0	0	0	0	0	0	0	0	0.000127779	0	0	0	0	0	0.000292468	0	0	0	0	0	0	0	0	0	0	0	0	0	0	2.43635e-05	0	0	2.18403e-05	0	0	0	0	0	0	0	0	0	0	0	0	0	0	0
Neisseria_sicca	0	0.00168575	0	0.0168067	0	0	0	0	0	0.000383338	0	0	0	0	0	0.00128952	0.00107991	0	0	0	0	0	0	0	0	0	0.000268132	0	0	0.000705716	6.09088e-05	0	0	0.000579982	0	0	0	0	0.000337553	0	0	0	0	0	0	0	0	0	0
Neisseria_subflava	0.0285375	0.000639423	0	0	0.000178031	0.000246214	0.000298775	0.00548446	0	0.000894454	0.000130225	0.0175439	0	0	0	0.0631996	0.00971922	0	0.0218579	0	0	0	0	0.00176835	0	0	0	6.33349e-05	0	0.00211715	2.43635e-05	0	0	0.00428313	0.000429415	0	0	0.00164813	0.000506329	0	0	0	9.76586e-05	0	0.016129	2.95718e-05	0.00388027	0	5.57491e-05
Neisseria_weaveri	0.00118906	0	0	0	0	0	0	0	0	0	0	0	0	0	0	1.3294e-05	0	0	0	0	0	0	0	0	0	0	0	0	0	0	0	0	0	4.8534e-06	0	0	0	0	0	0	0	0	0	0	0	0	0	0	0
Neofusicoccum_parvum	0	0	0	0	0	0	0	0	0	0	0	0	0	0	0	0	0	0	0	0	0	0	0	0	0	0	0	0	0	0	0	0	0	0	0	0	0	0	0	0	0	0	0	0	0	0	0	0	0
Nesterenkonia_jeotgali	0	0	0	0	0	0	0	0	0	0	0	0	0	0	0	3.98819e-05	0	0	0	0	0	0	0	0	0	0	0	0	0	0	0	0	0	0	0	0	0	0	0	0	0	0	0	0	0	0	0	0	0
Niastella_koreensis	0	0	0	0	0	0	0	0	0	0	0	0	0	0	0	0	0	0	0	0	0	0	0	0	0	0	0	0	0	0	0	0	0	0	0	0	0	0	0	0	0	0	0	0	0	0	0	0	0
Nitrobacter_hamburgensis	0	0	0	0	0	0	0	0	0	0	0	0	0	0	0	0	0	0	0	0	0	0	0	0	0	0	0	0	0	0.00105857	0	0	0	0	0	0	0	0	0	0	0	0	0	0	0	0	0	0	0
Nitrobacter_winogradskyi	0	0	0	0	0	0	0	0	0	0	0	0	0	0	0	0	0	0	0	0	0	0	0	0	0	0	0	0	0	0	0	0	0	0	0.000214707	0	0	0	0	0	0	0	4.88293e-05	0	0	0	0	0	5.57491e-05
Nitrosomonas_europaea	0	0	0	0	0	0	0	0	0	0	0	0	0	0	0	0	0	0	0	0	0	0	0	0	0	0	0	0	0	0	0	0	0	0	0	0	0	0	0	0	0	0	0	0	0	0	0	0	0
Nitrosopumilus_maritimus	0	0	0	0	0	0	0	0	0	0.000127779	0	0	0	0	0	0	0	0	0	0	0	0	0	0	0	0	0	0	0	0	0	0	0	0	0	0	0	0	0	0	0	0	0	0	0	0	0	0	0
Nitrosospira_multiformis	0	0	0	0	0	0	0	0	0	0	0	0	0	0	0	0	0	0	0	0	0	0	0	0	0	0	0	0	0	0	0	0	0	0	0	0	0	0	0	0	0	0	0	0	0	0	0	0	0
Nocardia_caishijiensis	0	0	0	0	0	0	0	0	0	0	0	0	0	0	0	0	0	0	0	0	0	0	0	0	0	0	0	0	0	0	0	0	0	0	0	0	0	0	0	0	0	0	0	0	0	0	0	0	0
Nocardia_carnea	0	0	0	0	0	0	0	0	0	0	0	0	0	1.95191e-05	0	0	0	0	0	0	0	0	0	0	0	0	0	0	0	0	0	0	0	0	0	0	0	0	0	0	0	0	0	0	0	0	0	0	0
Nocardia_cyriacigeorgica	0	0	0	0	0	0	0	0	0	0	0	0	0	0	0	0	0	0.0203177	0	0	0	0	0	0	0	0	0	0	0	0	0	0	0	0	0	0	0	0	0	0	0	0	0	0	0	0	0	0	0
Nocardia_farcinica	0	0	0	0	0	0	0	0	0	0.000127779	0	0	0	0	0	0	0	0.904876	0	0	0	0	0	0	0	0	0	0	0	0	0	0	0	0	0	0	0	0	0	0	0	0	0	0	0	0	0	0	0
Nocardia_harenae	0	0	0	0	0	0	0	0	0	0	0	0	0	0	0	0	0	0	0	0	0	0.000112549	0	0	0	0	0	0	0	0	0	0	0	0	0	0	0	0	0	0	0	0	0	0	0	0	0	0	0
Nocardia_mikamii	0	0	0	0	0	0	0	0	0	0	0	0	0	0	0	0	0	0	0	0	0	0	0	0	0	0	0	0	0	0	0	0	0	0	0	0	0	0	0	0	0	0	0	0	0	0	0	0	0
Nocardia_miyunensis	0	0	0	0	0	0	0	0	0	0	0	0	0	0	0	0	0	0	0	0	0	0	0	0	0	0	0	0	0	0	0	0	0	0	0	0	0	0	0	0	0	0	0	0	0	0	0	0	0
Nocardia_nova	0	0	0	0	0	0	0	0	0	0.000127779	0	0	0	0	0	0	0	0	0	0	0	0	0	0	0	0	0	0	0	0	0	0	0	0	0	0	0	0	0	0	0	0	0	0	0	0	0	0	0
Nocardia_puris	0	0	0	0	0	0	0	0	0	0	0	0	0	0	0	0	0	0	0	0	0	0	0	0	0	0	0	0	0	0	0	0	0	0	0	0	0	0	0	0	0	0	0	0	0	0	0	0	0
Nocardia_salmonicida	0	0	0	0	0	0	0	0	0	0	0	0	0	0	0	0	0	0	0	0	0	0	0	0	0	0	0	0	0	0	0	0	0	0	0	0	0	0	0	0	0	0	2.44147e-05	0	0	0	0	0	0
Nocardia_speluncae	0	0	0.00299401	0	0	0	0	0	0	0	0	0	0	0	0	0	0	0	0	0	0	0	0	0	0	0	0	0	0	0	0	0	0	0	0	0	0	0	0	0	0	0	0	0	0	0	0	0	0
Nocardia_takedensis	0	0	0	0	0	0	0	0	0	0	0	0	0	0	0	0	0	0	0	0	0	0	0	0	0	0	0	0	0	0	0	0	0	0	0	0	0	0	0	0	0	0	0	0	0	0	0	0	5.57491e-05
Nocardia_testacea	0	0	0	0	0	0	0	0	0	0.000127779	0	0	0	0	0	0	0	0	0	0	0	0	0	0	0	0	0	0	0	0	0	0	0	0	0	0	0	0	0	0	0	0	0	0	0	0	0	0	0
Nocardia_vaccinii	0	0	0	0	0	0	0	0	0	0	0	0	0	0	0	0	0	0	0	0	0	0	0	0	0	0	0	0	0	0	0	0	0	0	0	0	0	0	0	0	0	0	0	0	0	0	0	0	0
Nocardia_vinacea	0	0	0	0	0	0	0	0	0	0	0	0	0	0	0	0	0	0	0	0	0	0	0	0	0	0	0	0	0	0	0	0	0	0	0	0	0	0	0	0	0	0	0	0	0	0	0	0	5.57491e-05
Nocardiopsis_dassonvillei	0	0	0	0	0	0	0	0	0	0	0	0	0	0	0	0	0	0	0	0	0	0	0	0	0	0	0	0	0	0	0	0	0	0	0	0	0	0	0	0	0	0	0	0	0	0	0	0	0
Nosema_bombycis	0	0	0	0	0	0	0	0	0	0	0	0	0	0	0	0	0	0	0	0	0	0	0	0	0	0	0	0	0	0	0	0	0	0	0	0	0	0	0	0	0	0	0	0	0	0	0	0	0
Nosocomiicoccus_ampullae	0	0	0	0	0	0	0	0	0	0	0	0	0	0	0	0	0	0	0.00546448	0	0	0	0	0	0	0	0	0	0	0	0	0	0	0	0	0	0	0	0	0	0	0	0	0	0	0	0	0	0
Nostoc_punctiforme	0	0	0	0	0	0	0	0	0	0.000127779	0	0	0	0	0	0	0	0	0	0	0	0	0	0	0	0	0	0	0	0	0	0	0	0	0	0	0	0	0	0	0	0	0	0	0	0	0	0	0
Novosphingobium_aromaticivorans	0	0.000116259	0	0	0	0.000615536	0	0	0	0.000127779	0	0	0	0	0	0	0	0	0	0	0	0	0	0	0	0.00055991	0	0	0.000107724	0.00141143	2.43635e-05	0	0	0	0.00611916	0	0	0	0.00135021	0	0	0	0	0	0.016129	0	0	0	0.000111498
Obesumbacterium_proteus	0	0.000116259	0.010479	0	0.000534093	0.00196972	0.00149388	0	0.0055325	0.000958344	0	0	0	0	0	0	0	0	0	0	0	0	0	0.000884173	0	0	5.36265e-05	1.15154e-05	0	0.00776288	2.43635e-05	5.34064e-05	0	0	0.00955448	0	0	0.000824063	0.00421941	0	0	0	0	0	0	0	0.000554324	0	0.000752613
Oceanithermus_profundus	0	0	0	0	0	0	0	0	0	0.000127779	0	0	0	0	0	0	0	0	0	0	0	0	0	0	0	0	0	0	0	0	0	0	0	0	0	0	0	0	0	0	0	0	0	0	0	0	0	0	0
Oceanobacillus_iheyensis	0	0	0	0	0	0	0	0	0	0	0	0	0	0	0	0.000997049	0	0	0	0	0	0	0	0	0	0	0	0	0	0	0	0	0	0	0	0	0	0	0	0	0	0	0	0	0	0	0	0	0
Oceanobacillus_massiliensis	0	0	0	0	0	0	0	0	0	0.000127779	0	0	0	0	0	1.3294e-05	0	0	0	0	0	0	0	0	0	0	0	0	0	0	0	0	0	0	0	0	0	0	0	0	0	0	0	0	0	0	0	0	0
Ochrobactrum_anthropi	0	0	0	0	0	0.00209282	0	0.00548446	0	0.0024278	0	0	1.68101e-05	0	0	1.3294e-05	0	0	0	1.29054e-05	0	0.000112549	0	0	0	0	5.36265e-05	0	0	0	0.000182726	0	0	0	0	0	0	0	0	0	0	0	0	0	0	0	0	0	0.000404181
Ochrobactrum_intermedium	0	0	0	0	0.000178031	0	0	0	0	0.000255558	0	0	0	0	0	0	0	0	0	0	0	0	0	0	0	0	0	0	0	0	0	0	0	0	0.000429415	0	0	0	0.000675105	0	0	0	6.10366e-05	0	0	0	0	0	0
Ochrobactrum_oryzae	0	0	0	0	0	0	0	0	0	0	0	0	0	5.85572e-05	0	0	0	0	0	4.3018e-06	0	0	0	0	0	0	0	0	0	0	0	0	0	0	0	0	0	0	0	0	0.000924214	0	0	0	0	0	0	0	0
Ochroconis_constricta	0	0	0	0	0	0	0.00059755	0	0	0.000127779	0	0	0	0	0	0	0	0	0	0	0	0	0	0	0	0	0	0	0	0	0	0	0	0	0	0	0	0	0	0	0	0	0	0	0	0	0	0	0
Octadecabacter_antarcticus	0	0	0	0	0	0	0	0	0	0	0	0	0	0	0	0	0	0	0	0	0	0	0	0	0	0	0	0	0	0	0	0	0	0	0	0	0	0	0	0	0	0	0	0	0	0	0	0	0
Octadecabacter_arcticus	0	0	0	0	0	0	0	0	0	0	0	0	0	0	0	0	0	0	0	0	0	0	0	0	0	0	0	0	0	0	0	0	0	0	0	0	0	0	0	0	0	0	0	0	0	0	0	0	0
Odoribacter_splanchnicus	0	0	0	0	0	0.000492429	0.000448163	0	0	0.000255558	0	0	0	0	0	0.000106352	0	0	0	8.60359e-06	0	0	0	0	0	0	5.36265e-05	0	0	0	0	0	0	0	0.000214707	0	0	0	0	0	0	0	0	0	0	1.47859e-05	0	0	0.000209059
Oenococcus_oeni	0	0	0	0	0	0	0.000298775	0	0	0	0	0	0	0	0	0	0	0	0	0	0	0	0	0	0	0	0	0	0	0	0	0	0	0	0	0	0	0	0	0	0	0	2.44147e-05	0	0	0	0	0	0
Oerskovia_turbata	0	0	0	0	0	0	0	0	0	0	0	0	0	0	4.2996e-05	1.3294e-05	0	0	0	0	0	0	0	0	0	0	0	0	0	0	0	0	0	0	0	0	0	0	0	0	0	0	0	0	0	0	0	0	0
Ogataea_minuta	0	0	0	0	0	0	0	0	0	0	0	0	0	0	0	0	0	0	0	0	0	0	0	0	0	0	0	0	0	0	0	0	0	0	0	0	0	0	0	0	0	0	0	0	0	0	0	0	0
Ogataea_polymorpha	0	0	0	0	0	0	0	0	0	0	0	0	0	0	0	0	0	0	0	0	0	0	0	0	0	0	0	0	0	0	0	0	0	0	0	0	0	0	0	0	0	0	0	0	0	0	0	0	0
Ogataea_ramenticola	0	0	0	0	0	0	0	0	0	0	0	0	0	0	0	0	0	0	0	0	0	0	0	0	0	0	0	0	0	0	0	0	0	0	0	0	0	0	0	0	0	0	0	0	0	0	0	0	0
Oligella_ureolytica	0	0	0	0	0	0	0	0	0	0	0	0	0	0	0	0	0	0	0	0	0	0	0	0	0	0	0	0	0	0	0	0	0	0	0	0.00300752	0	0	0	0	0	0	0	0	0	0	0	0	0
Oligella_urethralis	0	0	0	0	0	0	0	0	0	0	0	0	0	0	0	0	0	0	0	4.3018e-06	0	0	0	0	0	0	0	0	0	0.000705716	0	0	0	0	0	0	0	0	0	0	0	0	0	0	0	0	0	0	0
Oligotropha_carboxidovorans	0	0	0	0	0	0.000246214	0.000298775	0	0	0	0	0	0	0	0	0	0	0	0	0	0	0	0	0	0	0	0	0	0	0.000705716	0	0	0	0	0	0	0	0	0	0	0	0	0	0	0	0	0	0	0
Olsenella_uli	0.00118906	0	0	0	0.000267046	0	0.000298775	0	0	0.000127779	0.00169293	0	0	0	8.59919e-05	2.6588e-05	0	0	0.00546448	0.000623761	0	0	0	0.00132626	0	0	0.000268132	0	0	0	0	0.00204725	0.000971188	1.45602e-05	0	0	0	0	0	0.00011422	0	0	0	0.000133191	0	0.000214396	0	0	0.000111498
Ophiostoma_piceae	0	0	0	0	0	0.000246214	0	0	0	0	0	0	0	0	0	0	0	0	0	0	0	0	0	0	0	0	0	0	0	0	0	0	0	0	0	0	0	0	0	0	0	0	0	0	0	0	0	0	0
Opitutus_terrae	0	0	0	0	0	0	0	0	0	0	0	0	0	0	0	0	0	0	0	0	0	0	0	0	0	0	0	0	0	0	0	0	0	0	0.000214707	0	0	0	0	0	0	0	0	0	0.016129	0	0	0	0
Oribacterium_parvum	0	0	0	0	0	0	0	0	0	0.000255558	0	0	0	0	0	0.000930579	0	0	0	9.03377e-05	0	0	0	0.000884173	0	0	0	0	0.000107724	0	0.00028018	0	0	6.55209e-05	0	0	0	0	0	0.00319817	0	0	2.44147e-05	0	0	0	0	0	0
Oribacterium_sinus	0	0	0.00299401	0	0	0	0	0	0	0	0	0	0	0	0	0.00130281	0	0	0.0163934	3.87162e-05	0	0	0	0.00176835	0	0	0.000268132	0	0	0	0.00532343	0	0	0.00129829	0	0	0	0	0	0.00365505	0	0	4.88293e-05	0	0	0	0	0	5.57491e-05
Ornithobacterium_rhinotracheale	0	0	0	0	0	0	0	0	0	0	0	0	0	0	0	0	0	0	0	0	0	0	0	0	0	0	0	0	0	0	0	0	0	0	0	0	0	0	0	0	0	0	0	0	0	0	0	0	0
Oscillibacter_valericigenes	0	0	0	0	0	0	0	0	0	0	0	0	0	0	0	0	0	0	0	0	0	0	0	0	0	0	0	0	0	0	0	0	0	0	0	0	0	0	0.000337553	0	0	0	0	0	0	0	0	0	0
Oxalobacter_formigenes	0	0	0	0	0	0	0	0	0	0	0	0	0	0	0	0	0	0	0	0	0	0	0	0	0	0	0	0	0	0	0	0	0	0	0	0	0	0	0	0	0	0	0	0	0	0	0	0	5.57491e-05
Paenalcaligenes_hominis	0	0	0	0	0	0	0	0	0	0	0	0	0	0	0	0	0	0	0	0	0	0	0	0	0	0	0	0	0	0	0	0	0	0	0	0	0	0	0	0	0	0	0	0	0	0	0.000554324	0	0
Paenibacillus_amylolyticus	0	0	0	0	0	0	0	0	0	0	0	0	0	0	0	0	0	0	0	0	0	0	0	0	0	0	0	0	0	0	0	0	0.000647459	0	0	0	0	0	0	0	0	0	0	0	0	0	0	0	0
Paenibacillus_durus	0	0	0	0	0	0	0	0	0	0	0	0	0	0	0	0	0	0	0	0	0	0	0	0	0	0	0	0	0	0	0	0	0	0	0	0	0	0	0	0	0	0	0	0	0	0	0	0	0
Paenibacillus_glucanolyticus	0	0	0	0	0	0	0	0	0	0	0	0	0	0	0	0	0	0	0	0	0	0	0	0	0	0	0	0	0	0	0	0	0	0	0	0	0	0	0	0	0	0	0	0	0	0	0	0	0
Paenibacillus_lactis	0	0	0	0	0	0	0	0	0	0	0	0	0	0	0	0	0	0	0	0	0	0	0	0	0	0	0	0	0	0	0	0	0	0	0	0	0	0	0	0	0	0	0	0	0	0	0	0	0
Paenibacillus_lautus	0	0	0	0	0	0	0	0	0	0	0	0	0	0	0	0	0	0	0	0	0	0	0	0	0	0	0	0	0	0	0	0	0	0	0	0	0	0	0	0	0	0	0	0	0	0	0	0	0
Paenibacillus_macerans	0	0	0	0	0	0	0	0	0	0	0	0	0	0	0	0	0	0	0	0	0.00732984	0	0	0	0	0	0	0	0	0	0	0	0	0	0	0	0	0	0	0	0	0.0118577	0	0	0	0	0	0	0
Paenibacillus_massiliensis	0	0	0	0	0	0	0	0	0	0	0	0	0	0	0	0	0	0	0	0	0	0	0	0	0	0	0	0	0	0	0	0	0	0	0	0	0	0	0	0	0	0	0	0	0	0	0.000554324	0	0
Paenibacillus_mucilaginosus	0	0	0	0	0	0	0	0	0	0	0	0	0	0	0	0	0	0	0	0	0	0	0	0	0	0	0	0	0	0	0	0	0	0	0	0	0	0	0	0	0	0	0	0	0	0	0	0	0
Paenibacillus_peoriae	0	0	0	0	0	0	0	0	0	0	0	0	0	0	0	0	0	0	0	0	0	0	0	0	0	0	0	0	0	0	0	0	0	0	0.000214707	0	0	0	0	0	0	0	0	0	0	0	0	0	0
Paenibacillus_polymyxa	0	0	0	0	0	0	0	0	0	0	0	0	0	0	0	0	0	0	0	1.29054e-05	0	0	0	0	0	0	0	0	0	0	0	0	0	0	0	0	0	0	0	0	0	0	0	0	0	0	0	0	0
Paenibacillus_sanguinis	0	0	0	0	0	0	0	0	0	0	0	0	0	0	0	0	0	0	0	0	0	0	0	0	0	0	0	0	0	0	0	0	0	0	0	0	0	0	0	0	0	0	0	0	0	0	0	0	0
Paeniclostridium_sordellii	0	0	0	0	0	0.000246214	0.00059755	0	0	0	0	0	0	0	0	0	0	0	0	0	0	0	0	0	0	0	0	0	0	0	0	0	0	0	0	0	0	0	0	0	0	0	2.44147e-05	0	0	0	0	0	0
Paludibacter_propionicigenes	0	0	0	0	0	0	0	0	0	0.000127779	0	0	0	0	0	0	0	0	0	0	0	0	0	0	0	0	0	0	0	0	0	0	0	0	0	0	0	0	0	0	0	0	0	0	0	0	0	0	0
Pandoraea_apista	0	0	0	0	0	0.000246214	0	0	0	0	0	0	0	0	0	0	0	0	0	0	0	0	0	0	0	0	0	0	0	0	2.43635e-05	0	0	0	0.000429415	0	0	0	0	0	0	0	2.44147e-05	0	0	0	0	0	5.57491e-05
Pandoraea_norimbergensis	0	0	0	0	0.000178031	0.000246214	0	0	0	0	0	0	0	0	0	0	0	0	0	8.60359e-06	0	0	0	0	0	0	0	0	0	0	2.43635e-05	0.000551867	0	0	0.00161031	0	0	0	0	0	0	0	4.88293e-05	0	0	0	0	0	5.57491e-05
Pandoraea_pnomenusa	0	0	0.00299401	0	0.000178031	0.000861751	0.00059755	0	0	0	0	0	0	0	0	0	0	0	0	0	0	0	0	0	0	0	0	0	0.000107724	0.00105857	2.43635e-05	0	0	0	0	0.00300752	0	0	0	0	0	0	0	0	0	0	0	0	0.00045993
Pandoraea_pulmonicola	0	0	0	0	0	0	0	0	0	0	0	0	0	0	0	0	0	0	0	4.3018e-06	0	0	0	0	0	0	0	0	0	0	0	0	0	0	0.000214707	0	0	0	0	0	0	0	4.88293e-05	0	0	0	0	0	0
Pandoraea_sputorum	0	0	0	0	0	0	0	0	0	0	0	0	0	0	0	0	0	0	0	0	0	0	0	0	0	0	0	0	0	0	0	0	0	0	0.000214707	0	0	0	0.000337553	0	0	0	0	0	0	0	0	0	0
Pannonibacter_phragmitetus	0	0.000232518	0	0	0.000534093	0	0	0	0	0.00313059	0	0	0	0	0	1.3294e-05	0	0	0	0	0.00314136	0	0	0	0	0	0	0	0	0.00458716	7.30905e-05	5.34064e-05	0	0	0.000644122	0.00902256	0	0	0	0	0	0	0	0	0	0	0	0	0.000362369
Pantoea_agglomerans	0	0	0	0	0	0	0	0	0	0.000383338	0	0	0	0	0	0	0	0	0	0	0.00104712	0	0	0	0	0	0	0	0	0.00247001	0	0	0	0	0.00085883	0	0	0	0.000337553	0	0	0	2.44147e-05	0	0	0	0	0	0
Pantoea_ananatis	0	0	0	0	0.000178031	0	0	0	0	0.000766675	0	0	0	0	4.2996e-05	0	0	0	0	0	0.00104712	0	0	0	0	0	0	0	0	0.00105857	0	0	0	0	0.000214707	0	0	0	0.000337553	0	0	0	0	0	0	0	0	0	0
Pantoea_dispersa	0	0.000116259	0	0	0	0	0	0	0	0.227703	0	0	0	0	0	0	0	0	0	0	0	0	0	0	0	0	0	0	0	0	0	0	0	0	0	0	0	0	0	0	0	0	0	0	0	0	0	0	0
Pantoea_vagans	0	0	0	0	0	0	0	0	0	0.00191669	0	0	0	0	0	0	0	0	0	4.3018e-06	0	0	0	0	0	0	0	0	0	0.000705716	0	0	0	0	0.000429415	0	0	0	0	0	0	0	2.44147e-05	0	0	0	0	0	0
Papiliotrema_flavescens	0	0	0	0	0	0	0	0	0	0	0	0	0	0	0	0	0	0	0	0	0	0	0	0	0	0	0	0	0.000107724	0	0	0	0	0	0.000214707	0	0	0	0	0	0	0	0	0	0	0	0	0	0
Parabacteroides_distasonis	0	0	0	0	0	0.000861751	0.000298775	0	0	0.000511117	0	0	0	0	0	0	0	0	0	0	0	0	0	0	0	0	5.36265e-05	0	0	0.00282287	0	5.34064e-05	0	4.8534e-06	0	0	0	0	0.0148523	0	0	0	0	0	0	0	0	0	0.000557491
Parabacteroides_goldsteinii	0	0	0	0	0	0	0	0	0	0	0	0	0	1.95191e-05	0	0	0	0	0	0	0	0	0	0	0	0	0	0	0	0	0	0	0	0	0	0	0	0	0.00337553	0	0	0	0	0	0	0	0	0	0
Parabacteroides_merdae	0	0	0	0	0	0.000246214	0	0	0	0.000127779	0	0	0	0	0	2.6588e-05	0	0	0	4.3018e-06	0	0	0	0	0	0	0.000294946	0	0	0	0	0	0	2.18403e-05	0	0	0	0	0	0	0	0	0	0	0	0	0.000554324	0	0
Paraburkholderia_fungorum	0	0	0	0	0	0	0	0	0	0	0	0	0	0	0	0	0	0	0	8.60359e-06	0	0	0	0	0	0	0	0	0	0	0	0	0	0	0	0	0	0	0	0	0	0	0	0	0	0	0	0	0.0130314
Paraclostridium_bifermentans	0	0	0	0	0	0.000246214	0	0	0	0	0	0	0	0	0	0	0	0	0	0	0	0	0	0	0	0	0	0	0	0	0	0	0	0	0.000214707	0	0	0	0	0	0	0	0	0	0	0	0	0	0.000111498
Paracoccus_aminophilus	0	0	0	0	0	0	0	0	0	0	0	0	0	0	0	0	0	0	0	4.3018e-06	0	0	0	0	0	0	0	0	0	0	0	0	0	0	0	0	0	0	0	0	0	0	0	0	0	0	0	0	0
Paracoccus_denitrificans	0	0	0	0	0	0	0	0	0	0	0	0	0	0	0	0	0	0	0	0	0.00314136	0	0	0	0	0	0	0	0.000107724	0	0	0	0	0	0	0	0	0	0	0	0	0	2.44147e-05	0	0	0	0	0	5.57491e-05
Paracoccus_sanguinis	0	0.000232518	0	0	0	0.000246214	0.00164326	0	0	0.00172502	0	0	0	9.75953e-05	0	0	0.00107991	0	0	8.60359e-06	0.00209424	0	0	0	0	0	0	0	0	0.00458716	0.000328907	0.000106813	0	0	0.00472356	0	0.00164474	0	0.00135021	0	0	0	0.000146488	0	0	0	0	0.000518941	0.00185366
Paracoccus_versutus	0	0	0	0	0	0	0	0	0	0.000766675	0.000390676	0	0	0	0	2.6588e-05	0	0	0	0	0.0534031	0	0	0	0	0	0	0	0	0	0	3.56043e-05	0	0	0.000214707	0	0	0	0	0	0	0	0	0	0	0	0	0	0.000111498
Paracoccus_yeei	0	0.000116259	0	0	0	0	0.000298775	0	0	0.00108612	0	0	0	5.85572e-05	0	0	0	0	0	0	0.00209424	0	0	0	0	0	0	0	0	0.00176429	0.000109636	0	0	0	0.00085883	0	0	0	0.00219409	0	0	0	2.44147e-05	0	0	0	0	0	0.000599303
Parageobacillus_toebii	0	0	0	0	0	0	0	0	0	0	0	0	0	0	0	0	0	0	0	0	0	0	0	0	0	0	0	0	0	0	0	0	0	0	0.000429415	0	0	0	0	0	0	0	0	0	0	0	0	0	0
Paramecium_bursaria_Chlorella_virus_FR483	0	0	0	0	0	0.000246214	0	0	0	0.000255558	0	0	0	0	0	0	0	0	0	0	0	0	0	0	0	0	0	0	0	0	0	0	0	0	0	0.00300752	0	0	0	0	0	0	0	0	0	0	0	0	0.000111498
Paraprevotella_clara	0	0	0	0	0	0	0	0	0	0	0	0	0	0	0	0	0	0	0	0	0	0	0	0	0	0	0	0	0	0	0	0	0	0	0	0	0	0	0	0	0	0	0	0	0	1.47859e-05	0	0	0
Paraprevotella_xylaniphila	0	0	0	0	0	0.000246214	0	0	0	0	0	0	0	0	0	0	0	0	0	0	0	0	0	0	0	0	0	0	0	0	0	0	0	0	0	0	0	0	0	0	0	0	0	0	0	0	0	0	5.57491e-05
Parascardovia_denticolens	0	0	0	0	0	0	0	0	0	0	0	0	0	0	0	0	0	0	0	0	0	0	0	0	0	0	0	0	0.000484757	0	2.43635e-05	8.90107e-05	0.000647459	6.06675e-05	0	0	0	0	0.000337553	0	0	0	4.88293e-05	0	0	0	0	0.000518941	0
Parastagonospora_avenae	0	0	0	0	0	0	0	0	0	0	0	0	0	0	0	0	0	0	0	0	0	0	0	0	0	0	0	0	0	0	0	0	0	4.8534e-06	0	0	0	0	0	0	0	0	0	0	0	0	0	0	0
Parastagonospora_nodorum	0	0	0	0	0	0	0	0	0	0.000127779	0	0	0	0	0	0	0	0	0	0	0	0	0	0	0	0	0	0	0	0	0	0	0	4.8534e-06	0.000214707	0	0	0	0	0	0	0	0	0	0	0	0	0	0
Parasutterella_excrementihominis	0	0	0	0	0	0	0	0.00548446	0	0	0	0	0	0	0	0	0	0	0	0	0	0	0	0	0	0	0	0	0	0	0	0	0	0	0	0	0	0	0	0	0	0	0	0	0	0	0	0	0
Parvibaculum_lavamentivorans	0	0.000116259	0	0	0	0	0	0	0	0	0	0	0	0	0	0	0	0	0	0	0	0	0	0	0	0	0	0	0	0.00105857	0	0	0	0	0.000214707	0	0	0	0	0.00011422	0	0	0	0	0	0	0	0	0
Parvimonas_micra	0.00118906	0	0	0	0.00462881	0.000492429	0.000298775	0	0	0.000766675	0.269176	0	0	0	0	0.017681	0	0	0.0163934	0.000395765	0	0	0	0	0	0	0.0217992	7.48503e-05	0	0.000705716	2.43635e-05	5.34064e-05	0.000971188	0.000196563	0.000214707	0.0150376	0	0.00288422	0.000506329	0	0	0	2.44147e-05	0	0	1.47859e-05	0	0	0.00015331
Pasteurella_bettyae	0	0	0	0	0	0	0	0	0	0	0	0	0	0	0	2.6588e-05	0	0	0	0	0	0	0	0	0	0	0	0	0	0	0	0	0	0	0	0	0	0	0	0	0	0	4.88293e-05	0	0	0	0	0	0
Pasteurella_dagmatis	0	0	0	0	0	0	0	0	0	0	0	0	0	0	0	1.3294e-05	0	0	0	0	0	0	0	0	0	0	0	0	0	0	0	0	0	4.8534e-06	0	0	0	0	0	0	0	0	0	0	0	0	0	0	0
Pasteurella_multocida	0	0	0	0	0	0	0	0	0	0	0	0	0	0	0	0	0	0	0	0	0	0	0	0	0	0	0	0	0	0.000705716	0	0	0	0	0	0	0	0	0	0	0	0	0	0	0	0	0	0	0
Pectobacterium_atrosepticum	0	0	0	0	0	0	0	0	0	0	0	0	0	0	0	0	0	0	0	0	0	0	0	0	0	0	0	0	0	0	0	0	0	0	0	0	0	0	0	0	0	0	0	0	0	0	0	0	0
Pectobacterium_carotovorum	0	0	0	0	0	0	0	0	0	0.000127779	0	0	0	0	0	0	0	0	0	0	0	0	0	0	0	0	0	0	0.000107724	0	0	0	0	4.8534e-06	0	0	0	0	0	0	0	0	0	0.000133191	0	0	0	0	0
Pectobacterium_wasabiae	0	0	0	0	0.000178031	0	0	0	0	0	0	0	0	0	0	0	0	0	0	0	0	0	0	0	0	0	0	0	0	0	0	0	0	0	0	0	0	0	0	0	0	0	0	0	0	0	0	0	0
Pediococcus_acidilactici	0	0	0	0	0.000623108	0.0188354	0.0297281	0	0	0	0	0	0	0	0	1.3294e-05	0	0	0	0	0	0	0	0	0	0	0	0	0	0	0	0	0	0	0	0	0	0	0	0	0	0	0.00657975	0	0	0	0	0	0.00309408
Pediococcus_pentosaceus	0	0	0	0	0.000178031	0.000984858	0.000896325	0	0	0	0	0	0	0	0	0	0	0	0	0	0	0	0	0	0	0	0	0	0	0.000705716	0	0	0	0	0	0	0	0	0	0	0	0	0.000671403	0	0	0	0	0	0.00030662
Pedobacter_heparinus	0	0	0	0	0	0.000246214	0	0	0	0	0	0	0	0	0	0	0	0	0	0	0	0	0	0	0	0	0	0	0	0	0	0	0	0	0	0	0	0	0	0	0	0	0	0	0	0	0	0	0
Pedobacter_saltans	0	0	0	0	0	0	0	0	0	0	0	0	0	0	0	0	0	0	0	0	0	0.000112549	0	0	0	0	0	0	0	0	0	0	0	0	0	0	0	0	0	0	0	0	2.44147e-05	0	0	0	0	0	0
Pelagibacterium_halotolerans	0	0	0	0	0	0	0	0	0	0	0	0	0	0	0	0	0	0	0	0	0	0	0	0	0	0	0	0	0	0	0	0	0	0	0	0	0	0	0	0	0	0	0	0	0	0	0	0	0
Pelobacter_propionicus	0	0	0	0	0	0	0	0	0	0	0	0	0	0	0	0	0	0	0	0	0	0	0	0	0	0	0	0	0	0	0	0	0	0	0	0	0	0	0	0	0	0	0	0	0	0	0	0	0
Penicillium_brasilianum	0	0	0	0	0	0	0	0	0	0.000127779	0	0	0	0	0	0	0	0	0	0	0	0	0	0	0	0	0	0	0	0	0	0	0	0	0	0	0	0	0	0	0	0	0	0	0	0	0	0	0
Penicillium_chrysogenum	0	0	0	0	0	0	0	0	0	0.000255558	0	0	0	1.95191e-05	0	0	0	0	0	4.3018e-06	0	0	0	0	0	0	0	0	0	0.000705716	0	0	0	0	0	0	0	0	0	0	0	0	2.44147e-05	0	0	0	0	0	0
Penicillium_citrinum	0	0	0	0.0756303	0	0	0	0	0	0.00268336	0	0	0	0	0	0	0	0	0	0	0	0	0	0	0	0	0	0	0	0	0.000292362	0	0	0	0	0	0	0	0	0	0	0	0	0	0	0	0	0	5.57491e-05
Penicillium_decumbens	0	0	0	0	0	0	0	0	0	0.000127779	0	0	0	0	0	0	0	0	0	0	0	0	0	0	0	0	0	0	0	0	0	0	0	0	0	0	0	0	0.000506329	0	0	0	0	0	0	0	0	0	0.000111498
Penicillium_digitatum	0	0.000348776	0	0	0	0	0	0	0	0	0	0	0	0	0	0	0	0	0	0	0	0	0	0	0	0	0	0	0.00150813	0.0116443	0.000170545	0.000160219	0	0	0	0	0	0	0	0	0	0	0	0	0	0	0	0	0
Penicillium_expansum	0	0	0	0	0	0.000492429	0	0	0	0.000127779	0	0	0	0	0	1.3294e-05	0	0	0	0	0	0	0	0	0	0	0	0	0	0	0	0	0	0	0	0	0	0	0.000337553	0	0	0	0	0	0	0	0	0	0
Penicillium_freii	0	0	0	0	0	0	0	0	0	0	0	0	0	0	0	0	0.00107991	0	0	0	0	0	0	0	0	0	0	0	0	0	0	0	0	0	0	0	0	0	0	0	0	0	0	0	0	0	0	0	0
Penicillium_italicum	0	0	0	0	0	0	0	0	0	0	0	0	0	0	0	0	0	0	0	0	0	0	0	0	0	0	0	0	0	0	0	0	0	0	0	0	0	0	0	0	0	0	0	0	0	0	0	0	0
Penicillium_janthinellum	0	0	0	0	0	0	0	0	0	0	0	0	0	0	0	0	0	0	0	0	0	0	0	0	0	0	0	0	0	0	0	0	0	0	0	0	0	0	0.000337553	0	0	0	0	0	0	0	0	0	0
Penicillium_oxalicum	0	0	0	0.0168067	0.000267046	0	0	0	0	0	0	0	0	0	0	0	0	0	0	0	0	0	0	0	0	0	0	0	0	0	0	0	0	2.18403e-05	0	0	0	0	0.000506329	0	0	0	0	0	0	0	0	0	0.000111498
Penicillium_paneum	0	0	0	0	0	0	0	0	0	0	0	0	0	0	0	0	0	0	0	0	0.00209424	0	0	0	0	0	0	0	0	0	0	0	0	0	0	0	0	0	0	0	0	0	0	0	0	1.47859e-05	0	0	0
Penicillium_sclerotiorum	0	0	0	0	0	0	0	0	0	0	0	0	0	0	0	0	0	0	0	0	0	0	0	0	0	0	0	0	0	0	0	0	0	0	0	0	0	0	0	0	0	0	0	0	0	0	0	0	0
Penicillium_solitum	0	0	0	0	0	0	0	0	0	0	0	0	0	0	0	0	0	0	0	0	0	0	0	0	0	0	0	0	0	0	0	0	0	0	0	0	0	0	0	0	0	0	2.44147e-05	0	0	0	0	0	0
Penicillium_steckii	0	0	0	0	0	0	0	0	0	0.000383338	0	0	0	0	0	0	0	0	0	0	0	0	0	0	0	0	0	0	0	0	0	0	0	0	0	0	0	0	0.00135021	0	0	0	0	0	0	0	0	0	0
Penicillium_subrubescens	0	0	0	0	0	0	0	0	0	0.000127779	0	0	0	0	0	0	0	0	0	0	0	0	0	0	0	0	0	0	0	0.00105857	0	0	0	0	0	0	0	0	0	0	0	0	0	0	0	0	0	0	0
Peptoniphilus_asaccharolyticus	0	0	0	0	0	0	0	0	0	0	0	0	0	0	0	1.3294e-05	0	0	0	4.3018e-06	0	0	0	0	0	0	0	0	0	0	0	0	0	4.8534e-06	0	0	0	0	0	0	0	0	0	0	0	0	0	0	0
Peptoniphilus_coxii	0	0	0	0	0	0	0	0	0	0.000127779	0	0	0	0	0	0	0	0	0	0	0	0	0	0	0	0	0	0	0	0.000705716	0	0	0	2.18403e-05	0.000214707	0	0	0	0	0	0	0	2.44147e-05	0	0	0	0	0	5.57491e-05
Peptoniphilus_duerdenii	0	0	0	0	0	0	0	0	0	0.000127779	0	0	0	1.95191e-05	0	0	0	0	0	0	0.00209424	0	0	0	0	0	0	0	0	0.000705716	2.43635e-05	0	0	1.45602e-05	0	0	0	0	0	0.00011422	0	0	0	0	0	0	0	0	0
Peptoniphilus_grossensis	0	0	0	0	0	0	0	0	0	0	0	0	0	0	0	1.3294e-05	0	0	0	0	0	0	0	0	0	0	0	0	0	0	0	0	0	7.2801e-06	0	0	0	0	0	0	0	0	2.44147e-05	0	0	0	0	0	0
Peptoniphilus_harei	0	0	0	0	0	0.000246214	0	0	0	0.000511117	0	0	0	3.90381e-05	0	0	0	0	0	0	0	0	0	0	0	0	0	0	0	0	0	0	0	9.70681e-06	0	0	0	0	0	0	0	0	0	0	0	0	0	0	0
Peptoniphilus_indolicus	0	0	0	0	0	0	0	0	0	0	0	0	0	0	0	0	0	0	0	0	0	0	0	0	0	0	0.000107253	0	0	0	2.43635e-05	0	0	0	0	0	0	0	0	0	0	0	4.88293e-05	0	0	0	0	0	0
Peptoniphilus_lacrimalis	0	0	0	0	0.00097917	0	0.000298775	0	0	0.000127779	0.000130225	0.0292398	0	0	0	0.0024195	0.00107991	0	0	0.00261979	0	0	0	0.00265252	0	0	0.00160879	0.00040304	0	0	0.00187599	5.34064e-05	0	0.00260142	0.000429415	0	0.00164474	0	0	0	0	0	2.44147e-05	0	0	0.000798439	0	0	0
Peptoniphilus_obesi	0	0	0	0	0	0	0	0	0	0	0	0	0	1.95191e-05	0	0	0	0	0	0	0	0	0	0	0	0	0	0	0	0	0	0	0	0	0	0	0	0	0	0	0	0	0	0	0	0	0	0	0
Peptoniphilus_rhinitidis	0	0	0	0	0.000178031	0	0	0	0	0	0	0	0	1.95191e-05	0	0	0	0	0	0	0	0	0	0	0	0	0	0	0	0	2.43635e-05	0	0	0	0.000429415	0.0180451	0	0	0	0	0	0	0	0	0	0	0.000554324	0	0.00015331
Peptoniphilus_senegalensis	0	0	0	0	0	0	0	0	0	0	0	0	0	0	0	2.6588e-05	0	0	0	0	0	0	0	0	0	0	0	0	0	0	0	0	0	0	0	0	0	0	0	0.00011422	0	0	0	0	0	0	0	0	0
Peptoniphilus_timonensis	0	0	0	0	0	0	0	0	0	0	0	0	0	0	0	0	0	0	0	0	0	0	0	0	0	0	0	0	0	0	0	0	0	0	0	0	0	0	0	0	0.000924214	0	0	0	0	0	0	0	0
Peptostreptococcaceae_bacterium_AS15	0	0	0	0	0	0	0	0	0	0	0	0	0	0	0	7.97639e-05	0	0	0.00546448	1.29054e-05	0	0	0	0	0	0	0	2.30309e-05	0	0	6.09088e-05	0	0	0	0	0	0	0	0	0	0	0	0	0	0	0	0	0	0
Peptostreptococcaceae_bacterium_oral_taxon_113	0	0	0	0	0	0	0	0	0	0	0.00494856	0	0	0	0	5.31759e-05	0	0	0	5.16216e-05	0	0	0	0	0	0	0.000804397	1.15154e-05	0	0	9.7454e-05	0	0	2.18403e-05	0	0	0	0	0	0	0	0	4.88293e-05	0.000133191	0	0	0	0.000518941	5.57491e-05
Peptostreptococcus_anaerobius	0.00118906	0	0	0	0	0.000246214	0	0	0	0	0	0	0	0	0	0	0	0	0	0	0	0	0	0	0	0	0.000107253	0	0	0.000705716	0	0	0	0	0	0.00300752	0	0	0	0.000571102	0	0	0	0	0	0	0	0	0
Peptostreptococcus_stomatis	0.0059453	0	0	0.0336134	0.000712124	0	0.000298775	0.00548446	0	0.00396116	0.000260451	0	0	0	0	0.00473266	0	0	0.00546448	9.46395e-05	0	0	0	0	0	0	0.00420968	0.000115154	0	0.00141143	0	0.000106813	0	0.000715877	0.000644122	0	0	0	0	0.0204455	0	0	0.000219732	0	0	0	0	0	0.000111498
Phaeoacremonium_minimum	0	0	0	0	0	0	0	0	0	0	0	0	0	0	0	0	0	0	0	0	0	0	0	0	0	0	0	0	0	0	0	0	0	0	0	0	0	0	0	0	0	0	0	0	0	0	0	0	0
Phaeocystis_globosa_virus	0	0	0	0	0	0	0	0	0	0	0	0	0	0	0	0	0	0	0	0	0	0	0	0	0	0	0	0	0	0	0	0	0	0	0	0	0	0	0	0	0	0	2.44147e-05	0	0	0	0	0	0
Phanerochaete_chrysosporium	0	0	0	0	0	0	0	0	0	0	0	0	0	0	0	0	0	0	0	0	0	0	0	0	0	0	0	0	0	0	0	0	0	0	0	0	0	0	0	0	0	0	0	0	0	0	0	0	0
Phascolarctobacterium_succinatutens	0	0	0	0	0	0	0	0	0	0	0	0	0	0	0	0	0	0	0	0	0	0	0	0	0	0	0	0	0	0	0	0	0	0	0	0	0	0	0	0	0	0	0	0	0	0	0	0	0
Phenylobacterium_zucineum	0	0	0	0	0.000178031	0.000246214	0	0	0	0	0	0	0	0	0	0	0	0	0	0	0	0	0	0	0	0	0	0	0	0.000705716	0	0	0	0	0	0	0	0	0.000337553	0	0	0	0	0	0	0	0	0	0.000111498
Phialophora_americana	0	0	0	0	0	0	0	0	0	0	0	0	0	0	0	0	0	0	0	0	0	0	0	0	0	0	0	0	0	0	0	0	0	0	0	0	0	0	0	0	0	0	0	0	0	0	0	0	0
Phialophora_attae	0	0	0	0	0	0	0	0	0	0	0	0	0	0	0	0	0	0	0	0	0	0	0	0	0	0	0	0	0	0	0	0	0	0	0	0	0	0	0	0	0	0	0	0	0	0	0	0	0
Phialophora_verrucosa	0	0	0	0	0	0	0	0	0	0	0	0	0	0	0	0	0	0	0	0	0	0	0	0	0	0	0	0	0	0	0	0	0	0	0	0	0	0	0	0	0	0	0	0	0	0	0	0	0
Phoma_herbarum	0	0	0	0	0	0	0	0	0	0	0	0	0	0	0	0	0	0	0	0	0	0	0	0	0	0	0	0	0	0.000705716	6.09088e-05	0	0	0	0	0	0	0	0	0	0	0	0	0	0	0	0	0	0
Phoma_koolunga	0	0	0	0	0	0	0	0	0	0	0	0	0	0	0	0	0	0	0	4.3018e-06	0	0	0	0	0	0	0	0	0	0	0	0	0	0	0	0	0	0	0	0	0	0	0	0	0	0	0	0	0
Photorhabdus_asymbiotica	0	0	0	0	0	0	0	0	0	0	0	0	0	0	0	0	0	0	0	0	0	0	0	0	0	0	0	0	0	0	0	0	0	0	0	0	0	0	0	0	0	0	0	0	0	0	0	0	0
Pichia_fermentans	0	0	0	0	0	0	0	0	0	0	0	0	0	0	0	0	0	0	0	0	0	0	0	0	0	0	0	0	0	0	0	0	0	0	0	0	0	0	0	0	0	0	0	0	0	0	0	0	0
Pichia_kluyveri	0	0	0	0	0	0	0	0	0	0	0	0	0	0	0	0	0	0	0	0	0	0	0	0	0	0	0	0	0	0	0	0	0	0	0	0	0	0	0	0	0	0	0	0	0	0	0	0	0
Pichia_kudriavzevii	0	0.00325525	0	0	0	0	0	0	0	0	0	0	0	0	0	0	0	0	0	0	0	0	0	0	0	0	0	0	0	0	0	0	0	0	0	0.0390977	0	0	0	0	0	0	0	0	0	0	0	0	0
Pichia_manshurica	0	0	0	0	0	0	0	0	0	0	0	0	0	0	0	0	0	0	0	0	0	0	0	0	0	0	0	0	0	0	0	0	0.000647459	0	0	0	0	0	0	0	0	0	0	0	0	0	0	0	0
Pichia_nakasei	0	0	0	0	0	0	0	0	0	0.000127779	0	0	0	0	0	0	0	0	0.00546448	0	0	0	0	0	0	0	0	0	0	0	0	0	0	0	0	0	0	0	0	0	0	0	0	0	0	0	0	0	5.57491e-05
Pichia_occidentalis	0	0	0	0	0	0	0	0	0	0	0	0	0	0	0	0	0	0	0	0	0	0	0	0	0	0	0	0	0	0	0	0	0	0	0	0	0	0	0	0	0	0	0	0	0	4.43577e-05	0	0	0
Pirellula_staleyi	0	0	0	0	0	0	0	0	0	0	0	0	0	0	0	0	0	0	0	0	0	0	0	0	0	0	0	0	0	0	0	0	0	0	0	0	0	0	0.000337553	0	0	0	0	0	0	0	0	0	0
Plasmodium_brasilianum	0	0	0	0	0	0	0	0	0	0	0	0	0	0	0	0	0	0	0	0	0	0	0	0	0	0	0	0	0	0	0	0	0.000647459	0	0	0	0	0	0	0	0	0	0	0	0	0	0	0	0
Plasmodium_vivax	0.00118906	0	0	0	0	0	0	0	0	0	0	0	0	0	0	0	0	0	0	0	0	0	0	0	0	0	0	0	0	0	0	0	0.000647459	4.8534e-06	0	0	0	0	0	0	0	0	0	0.000199787	0	0	0	0	0
Plautia_stali_symbiont	0	0	0	0	0	0	0	0	0	0.000894454	0	0	0	0	0	0	0	0	0	0	0	0	0	0	0	0	0	0	0	0	0	0	0	0	0	0	0	0	0	0	0	0	0	0	0	0	0	0	0
Pluralibacter_gergoviae	0	0	0	0	0.000178031	0	0	0	0	0.000511117	0	0	0	0	0	0	0	0	0	4.3018e-06	0.00209424	0	0	0	0	0	0	0	0	0.000705716	2.43635e-05	0	0	0	0	0	0	0	0.000675105	0	0	0	0	0	0	0	0	0	0.000111498
Pneumocystis_jirovecii	0	0.0639423	0	0	0.00364964	0	0	0	0.00276625	0	0	0	0	0.86608	0	1.3294e-05	0	0	0	0.0270583	0	0.0648284	0	0	0	0.00055991	0	0.941145	0	0	0	0	0	0.000322751	0	0.0240602	0	0	0.315105	0.000571102	0	0.16996	0	0	0	0	0.446231	0	0.00873868
Polaromonas_naphthalenivorans	0	0	0	0	0	0.000492429	0	0	0	0	0	0	0	0	0	0	0	0	0	0	0	0	0	0	0	0	0	0	0	0.000705716	0	0	0	0	0.000214707	0	0	0	0.000337553	0	0	0	0	0	0	0	0	0	5.57491e-05
Polymorphum_gilvum	0	0	0	0	0	0	0	0	0	0	0	0	0	0	0	0	0	0	0	0	0	0	0	0	0	0	0	0	0	0.000705716	0	0	0	0	0	0	0	0	0	0	0	0	0	0	0	0	0	0	0
Polynucleobacter_necessarius	0	0	0	0	0	0.000861751	0.000448163	0	0	0.000958344	0	0	0	0	0	0	0	0	0	0	0	0	0	0	0	0	0	0	0	0.0116443	3.65453e-05	0	0	0	0.00085883	0	0	0	0.00101266	0	0	0	8.54513e-05	0	0	0	0.000554324	0	0.000655052
Porcine_adenovirus_5	0	0	0	0	0	0	0	0	0	0	0	0	0	0	0	0	0	0	0	0	0	0	0	0	0	0	0	0	0	0	0	0	0	0	0	0	0	0	0	0	0	0	0	0	0	0	0	0	0
Porcine_endogenous_retrovirus_E	0	0	0	0	0	0	0	0	0	0	0	0	0	0	0	0	0	0	0	0	0	0	0	0	0	0	0	0	0	0	0	0	0	0	0	0	0	0	0	0	0	0	4.88293e-05	0	0	0	0	0	0
Porcine_parvovirus	0	0	0	0	0.000178031	0	0	0	0	0	0	0	0	0	0	0	0	0	0	0	0	0	0	0	0	0	0	0	0	0	0	0	0	0	0	0	0	0	0	0	0	0	0	0	0	0	0	0	0
Porcine_parvovirus_4	0	0	0	0	0	0	0	0	0	0	0	0	0	0	0	0	0	0	0	0	0	0	0	0	0	0	0	0	0	0	0	0	0	0	0	0	0	0	0	0	0	0	2.44147e-05	0	0	0	0	0	0
Porphyromonas_asaccharolytica	0	0	0	0	0	0	0	0	0	0.000127779	0	0	0	0	0	9.30579e-05	0	0	0	8.60359e-06	0	0	0	0	0	0	5.36265e-05	0	0	0	0	0	0	0.000131042	0	0	0	0	0	0	0	0	0	0	0	0	0	0	0
Porphyromonas_catoniae	0	0	0	0	0.000178031	0	0	0	0	0.000127779	0	0	0	0	0	0.000771051	0.0421166	0	0	3.01126e-05	0	0	0	0	0	0	0	0	0.0207368	0	0	0	0	1.45602e-05	0	0	0	0	0	0.000456882	0	0	2.44147e-05	0	0	0.000273539	0	0	0
Porphyromonas_endodontalis	0	0.000232518	0	0	0.000356062	0.000246214	0	0	0	0.000958344	0.0592525	0	0	0	4.2996e-05	0.047619	0	0	0	0.00112277	0	0.000112549	0	0	0	0	0.254645	0	0	0	0	0.00024923	0	2.4267e-05	0.000214707	0	0.00164474	0.000824063	0.000337553	0.000799543	0	0	9.76586e-05	0	0	0.000635794	0	0	0
Porphyromonas_gingivalis	0	0	0	0	0.000623108	0	0	0	0	0.00134168	0.00182315	0	0	0	4.2996e-05	0.107615	0.00107991	0	0	0	0	0	0	0	0	0	0.00311034	1.15154e-05	0	0.00105857	3.65453e-05	0	0.000647459	0.000177149	0.0219002	0	0	0	0	0	0	0	2.44147e-05	0	0	2.95718e-05	0	0	5.57491e-05
Porphyromonas_somerae	0	0.000232518	0	0	0.00952466	0.000615536	0	0.0347349	0	0.000766675	0.00130225	0	0	1.95191e-05	0	0.0729707	0.0075594	0	0	0	0	0	0	0.015473	0	0.0106383	0.000187693	0	0	0	0.00168108	0	0	0.0111531	0.000214707	0	0	0	0.00337553	0	0	0	0.00162357	0	0	0.0306586	0	0	5.57491e-05
Porphyromonas_uenonis	0	0	0	0	0	0	0	0	0	0	0.000130225	0	0	0	0	2.6588e-05	0	0	0	5.16216e-05	0	0	0	0	0	0	0	0	0.000107724	0	2.43635e-05	5.34064e-05	0	0.000143175	0	0	0	0	0.00185654	0	0	0	0	0	0	1.47859e-05	0	0	0
Prevotella_amnii	0	0	0	0	0	0	0	0	0	0	0	0	0	0	0	5.31759e-05	0.00107991	0	0	0.000103243	0	0	0	0	0	0	0.000375385	1.15154e-05	0.000646343	0	0.00287489	0	0	0.000730437	0	0	0.00164474	0	0	0	0	0	6.10366e-05	0.000133191	0	0.000628401	0	0	0.00015331
Prevotella_baroniae	0	0	0	0	0	0.000615536	0	0	0	0	0.000130225	0	0	0	0	0.0229587	0	0	0.0437158	2.58108e-05	0	0	0	0	0	0.00055991	0.000134066	0	0	0	2.43635e-05	0	0	9.46414e-05	0	0	0	0	0.00236287	0	0	0	0	0	0	0	0	0	0
Prevotella_bergensis	0	0	0	0	0	0	0	0	0	0	0	0	0	0	0	2.6588e-05	0	0	0	8.60359e-06	0	0	0	0	0	0	0.000187693	0	0	0	0	0	0	2.66937e-05	0	0	0	0	0	0	0	0	0	0	0	4.43577e-05	0	0	0
Prevotella_bivia	0	0	0	0	0	0.000492429	0	0.00548446	0	0.000127779	0	0	0	1.95191e-05	0	0.000717875	0	0	0	0.000159166	0	0.000112549	0	0.00132626	0	0	0.000536265	2.87886e-05	0.000377033	0.000705716	0.000353271	0	0	0.00140021	0	0	0	0	0.000506329	0	0	0	2.44147e-05	0	0	0.00163384	0	0	0.000111498
Prevotella_buccae	0	0	0	0	0	0.000861751	0	0	0	0.000127779	0	0	0	0	0	0.000172822	0	0	0	0.00016777	0	0	0	0.00707339	0	0	0.00112616	0	0	0	7.30905e-05	8.90107e-05	0	4.12539e-05	0.00118089	0	0.00164474	0	0	0	0	0	0	0	0	0.000177431	0.000554324	0	0.000111498
Prevotella_buccalis	0	0	0	0	0	0	0	0	0	0	0	0	0	0	0	0.000159528	0	0	0	0	0	0	0	0	0	0	0	0	0.000215448	0	2.43635e-05	5.34064e-05	0	2.18403e-05	0	0	0	0	0	0	0	0	0	0	0	0.000118287	0	0	0
Prevotella_copri	0	0	0	0	0.000178031	0	0.000896325	0	0	0	0.000130225	0	0	0.000175671	0	6.64699e-05	0.00107991	0	0	2.1509e-05	0	0	0	0.000884173	0	0	5.36265e-05	0	0	0	2.43635e-05	0	0	3.64005e-05	0.00826624	0	0	0	0	0.000342661	0	0	2.44147e-05	0	0	0	0	0	0.0017561
Prevotella_corporis	0	0	0	0	0	0	0	0	0	0.000127779	0	0	0	0	0	7.97639e-05	0	0	0	1.72072e-05	0	0	0	0	0	0.00055991	5.36265e-05	1.15154e-05	0	0	0.000109636	0	0	3.64005e-05	0	0	0	0	0	0.000342661	0	0	2.44147e-05	0	0	4.43577e-05	0	0	0
Prevotella_dentalis	0	0	0	0	0	0	0	0	0	0	0.000781352	0	0	0	0	0.000398819	0	0	0	5.16216e-05	0	0	0	0	0	0	5.36265e-05	0	0	0.00776288	0	0.000106813	0	4.8534e-06	0	0	0	0	0	0.00011422	0	0	0	0	0	0	0	0	0
Prevotella_denticola	0.00237812	0.000232518	0	0	0	0	0	0.00548446	0	0.000383338	0.000130225	0	0	0	0	0.000903991	0.00215983	0	0	0.000610855	0	0	0	0.0322723	0	0.00111982	0.00289583	2.87886e-05	0	0	0.00090145	0.00204725	0	0.00205784	0	0	0	0	0.000337553	0	0	0	0.000158695	0	0	0.00118287	0	0	0.00015331
Prevotella_disiens	0	0	0	0	0	0	0	0	0	0	0	0	0	0	0	0.000810933	0	0	0	3.44144e-05	0	0	0	0.000884173	0	0	0.00112616	0	0.000646343	0.000705716	0.000816177	0	0	0.000626089	0	0	0	0	0	0	0	0	2.44147e-05	0.000332978	0.016129	0.000214396	0	0	0
Prevotella_enoeca	0	0	0	0	0	0.000246214	0	0	0	0.000127779	0	0	0	0	0	0.000106352	0	0	0	3.01126e-05	0	0	0	0	0	0	0.000187693	0	0.000754067	0	0	5.34064e-05	0	0.000155309	0	0	0	0	0	0.000228441	0	0	0	0	0	5.17507e-05	0	0	0
Prevotella_intermedia	0	0.000116259	0	0	0.00169129	0.000492429	0.000896325	0	0	0.00108612	0.000781352	0	0	0	0	0.0180931	0.00107991	0	0.00546448	0.000292522	0	0.000112549	0	0.000884173	0	0	0.504009	2.30309e-05	0	0.00352858	0.00165672	0	0	0.00433894	0	0	0.00164474	0	0	0	0	0	0.00332039	0	0	0.0022031	0	0	0.0013101
Prevotella_loescheii	0.175981	0	0	0	0	0	0	0.0127971	0	0.00108612	0	0	0	0	0	0.00151551	0	0	0.00546448	6.4527e-05	0	0	0	0	0	0.00055991	0.000134066	0.00292492	0	0	2.43635e-05	0	0.00258983	0.022083	0	0	0	0	0.000337553	0.00137065	0	0	6.10366e-05	0.000399574	0	0.00444316	0	0	0
Prevotella_maculosa	0	0	0	0	0	0.000615536	0	0	0	0	0	0	0	0	0	0.000186116	0	0	0	0.00221543	0	0	0	0.00530504	0	0.00111982	0.000589891	1.15154e-05	0	0	6.09088e-05	3.56043e-05	0	0.000914866	0	0	0	0	0	0.000228441	0	0	2.44147e-05	0.000466169	0	0.000155252	0	0	0
Prevotella_marshii	0	0	0	0	0	0	0	0	0	0	0	0	0	0	0	3.98819e-05	0	0	0.00546448	3.01126e-05	0	0	0	0	0	0	0.000134066	6.33349e-05	0	0	2.43635e-05	0	0	0.000465927	0	0	0	0	0	0	0	0	0	0	0	0.000214396	0	0	0
Prevotella_melaninogenica	0	0	0	0	0	0.0017235	0.000298775	0.00548446	0	0.000255558	0.000260451	0.0292398	8.40506e-05	3.90381e-05	0	0.0134003	0.0896328	0	0.010929	0.00449108	0	0.000112549	0.021978	0.00928382	0	0.146137	0	0.00141064	0	0.000705716	0.208064	0	0.00226611	0	0.00751476	0	0	0	0.00219409	0	0	0.0118577	0.00393076	0	0	0.27674	0	0	5.57491e-05
Prevotella_micans	0	0	0	0	0	0	0	0	0	0	0	0	0	0	0	0.000186116	0	0	0	9.46395e-05	0	0	0	0	0	0.00055991	0	0	0	0	0	3.56043e-05	0	0.000696463	0	0	0	0	0	0.0011422	0	0	0	0	0	4.43577e-05	0	0	5.57491e-05
Prevotella_multiformis	0	0	0.00299401	0	0	0.000246214	0	0	0	0.000127779	0	0	0	0	4.2996e-05	0.00019941	0	0	0	0.000623761	0	0	0	0.000884173	0	0.00111982	0.000589891	0	0	0.000705716	9.7454e-05	0.000231428	0	0.000414966	0	0	0	0	0	0.000913764	0	0	4.88293e-05	0.000133191	0	0.000140466	0	0	0
Prevotella_multisaccharivorax	0	0	0	0	0	0	0	0	0	0	0	0	0	0	0	2.6588e-05	0	0	0	0.00292092	0	0	0	0.00176835	0	0	0.000268132	0	0.000646343	0.000705716	0	0	0.011978	2.18403e-05	0	0	0	0	0.000337553	0.00159909	0	0	4.88293e-05	0.000133191	0	0.00362994	0	0	0
Prevotella_nanceiensis	0	0	0	0	0	0	0	0	0	0	0	0	0	0	0	0.0869958	0.00107991	0	0	3.44144e-05	0	0	0	0.00839965	0	0	0.000214506	5.75772e-05	0	0.000705716	2.43635e-05	0	0	0.00508637	0	0	0	0	0.000506329	0.223301	0	0	0.000146488	0.000399574	0	0.0933804	0	0	0.000111498
Prevotella_nigrescens	0	0.000116259	0	0	0	0	0	0	0	0.00255558	0	0.0175439	0	5.85572e-05	0	0.00572971	0.00971922	0	0	0.000993715	0	0	0	0	0	0.00167973	0.0034321	7.48503e-05	0.000107724	0.000705716	0.000706542	0	0	0.00296786	0.00085883	0	0	0	0	0	0	0	0.000512708	0.000399574	0	0.000177431	0.000554324	0	0
Prevotella_oralis	0.00118906	0	0	0	0	0	0.000298775	0	0	0.000638896	0.000130225	0	0	0	0	0.000119646	0	0	0	0.00109266	0	0	0	0.00132626	0	0	5.36265e-05	0	0.00118496	0	0	0	0	2.4267e-05	0	0	0	0	0	0.00011422	0	0	0	0	0	8.13225e-05	0	0	0
Prevotella_oris	0.00118906	0	0	0	0	0.0304075	0	0	0	0.00849732	0.000390676	0	0	0	0	0.00261891	0.00107991	0	0	0.00255097	0	0	0	0.000884173	0	0.00671892	0.00203781	5.75772e-05	0	0.000705716	0.000523815	0.000373845	0.0110068	0.00183216	0.000429415	0	0	0	0	0	0	0	0.00018311	0.00219766	0.016129	0.00184084	0.000554324	0	0
Prevotella_pallens	0	0	0	0	0	0.000492429	0.000746938	0	0	0.000255558	0.000390676	0.0409357	0	0	0	0.0777964	0	0	0.00546448	0.000542026	0	0	0	0.0649867	0	0.0207167	0.022684	0.000132427	0.0122267	0	0.055159	0	0.00129492	0.00175208	0.00203972	0	0	0	0.00219409	0.118903	0	0.0118577	0.000634781	0.0133857	0	0.00116069	0	0	0
Prevotella_ruminicola	0	0	0	0	0	0	0	0	0	0	0	0	0	0	0	7.97639e-05	0	0	0	0	0	0	0	0	0	0	0	0	0	0	0	0	0	4.8534e-06	0	0	0	0	0	0	0	0	0	0	0	0	0	0	0
Prevotella_saccharolytica	0	0	0	0	0	0	0	0	0	0	0	0.0175439	0	0	0	0.000385526	0.00107991	0	0	4.73198e-05	0	0	0	0	0	0	0	4.60617e-05	0.000107724	0	0	0	0	0.000138322	0	0	0.00328947	0	0	0.00125642	0	0	0	0	0	0.000155252	0	0	0
Prevotella_salivae	0	0	0	0	0.000178031	0	0	0.0639854	0	0	0.000130225	0	0	0	0	0.00437372	0	0	0.00546448	0.0196291	0	0	0	0.0499558	0	0.12318	0.00415605	0.00047789	0.000484757	0	0.00359362	0	0.000971188	0.018756	0	0	0	0	0.000337553	0.0646488	0	0	0.000146488	0.0765184	0.016129	0.0324624	0	0	5.57491e-05
Prevotella_scopos	0	0	0	0	0	0.000246214	0	0	0	0	0.000130225	0	0	1.95191e-05	0	0.000997049	0.00971922	0	0	0.00016777	0	0	0.021978	0	0	0.00951848	0.00195737	0.000264855	0.00479371	0	0.00355707	0	0	0.00612499	0.000644122	0	0	0	0.000675105	0.045574	0	0	0.000158695	0.000466169	0	0.0082801	0	0	5.57491e-05
Prevotella_stercorea	0	0	0	0	0	0.000246214	0	0	0	0	0	0	0	0	0	0	0	0	0	0	0	0	0	0	0	0	0	0	0	0	0	0	0	0	0	0	0	0	0	0	0	0	0	0	0	0	0	0	5.57491e-05
Prevotella_timonensis	0	0	0	0	0	0	0	0	0	0	0	0	0	3.90381e-05	0	0.000225998	0	0	0	5.16216e-05	0	0	0	0	0	0.00055991	0.00337847	1.15154e-05	0.000107724	0.00564573	0.000219272	3.56043e-05	0	0.000305764	0.000429415	0	0	0	0	0	0	0	4.88293e-05	0.000133191	0	0.000820617	0	0	0.000111498
Prevotella_veroralis	0	0	0	0	0	0.00430875	0	0	0	0.000511117	0	0	0	0	0	0.000744463	0.0107991	0	0.00546448	0.0007184	0	0	0	0.0424403	0	0.00895857	0.00557716	2.87886e-05	0.00867177	0	0.000353271	0	0	0.0142957	0.000214707	0	0	0	0	0	0	0	0.000573744	0.00293021	0	0.0265333	0	0	5.57491e-05
Prevotellamassilia_timonensis	0	0	0	0	0	0	0.000298775	0	0	0	0	0	0	0	0	3.98819e-05	0	0	0	1.29054e-05	0	0	0	0	0	0	0	0	0	0	0	0	0	4.8534e-06	0	0	0	0	0	0	0	0	0	0	0	0	0	0	0
Propionibacterium_acidifaciens	0.0059453	0	0	0	0	0	0	0	0	0.000127779	0.000130225	0	0	0	0	0.000239292	0	0	0	0.00103673	0	0	0	0.00309461	0	0	0.000509452	0	0.0052246	0	7.30905e-05	0	0.00258983	7.2801e-06	0.00429415	0	0	0	0	0.00011422	0	0	0	0	0	4.43577e-05	0	0	5.57491e-05
Propionibacterium_acnes	0	0	0	0	0	0	0	0	0	0	0	0	0	0	0	0	0	0	0	0	0	0	0.043956	0.00265252	0	0	0	0	0	0	0	0	0	0	0	0	0	0	0	0	0	0	0	0	0	0	0	0	0.0258537
Propionibacterium_freudenreichii	0	0	0	0	0.000178031	0	0	0	0	0	0	0	0	0	0	0	0	0	0	3.87162e-05	0	0	0	0	0	0	0	0	0	0	0	0	0	0	0	0	0	0	0	0	0	0	8.54513e-05	0	0	0	0	0	0.00015331
Propionibacterium_humerusii	0	0.00093007	0	0	0	0.00135418	0.000896325	0	0	0	0	0	0	1.95191e-05	0	0	0	0	0.00546448	0	0.00314136	0	0	0	0	0	0	0	0	0.00388144	0	5.34064e-05	0	0	0.00751476	0	0	0	0	0	0	0	2.44147e-05	0	0	0	0	0	0.00045993
Propionibacterium_namnetense	0	0	0.00299401	0	0	0.00160039	0.000746938	0	0	0	0.000130225	0	0	0	0	0	0	0	0.00546448	0	0	0.000225098	0	0	0	0	0	0	0	0	0.000255817	0	0	0	0.0041868	0	0	0	0	0	0	0.0118577	0.000146488	0	0	1.47859e-05	0.00110865	0	0.000557491
Propionibacterium_propionicum	0	0.000523165	0	0	0.000356062	0	0	0	0	0.000383338	0.000260451	0	0	0	0	0.000638111	0	0	0	6.88287e-05	0	0	0	0	0	0	0	0	0	0	0.00869777	3.56043e-05	0	0	0.000214707	0	0	0	0	0.000342661	0	0	0	0	0	2.95718e-05	0	0	0
Proteus_hauseri	0	0	0	0	0	0	0	0	0	0	0	0	0	0	0	0	0	0	0	0	0	0	0	0	0	0	0	0	0	0	0	0	0	0	0	0	0	0	0	0	0	0	0	0	0	0	0	0	0
Proteus_mirabilis	0	0	0	0	0	0	0.000298775	0	0	0	0	0	0	0	0	0	0	0	0	0	0	0	0	0	0	0	0	0	0	0	0	0	0	0	0	0	0	0	0	0	0	0	0	0	0	0	0	0	0
Proteus_vulgaris	0	0	0	0	0	0	0	0	0	0	0	0	0	0	0	0	0	0	0	0	0	0	0	0	0	0	0	0	0	0	0	0	0	0	0	0	0	0	0	0	0	0	0	0	0	0	0	0	0
Providencia_alcalifaciens	0	0	0	0	0	0	0	0	0	0	0	0	0	0	0	1.3294e-05	0	0	0	0	0	0	0	0	0	0	0	0	0	0	0	0	0	0	0	0	0	0	0	0	0	0	0.000256354	0	0	0	0	0	0
Providencia_rettgeri	0	0	0	0	0	0	0	0	0	0.000638896	0	0	0	0	0	0	0	0	0	0	0	0	0	0	0	0	0	0	0	0	0	0	0.000647459	0	0	0	0	0	0	0	0	0	0	0	0	0	0	0	5.57491e-05
Providencia_rustigianii	0	0	0	0	0	0	0	0	0	0	0	0	0	0	0	0	0	0	0	0	0	0	0	0	0	0	0	0	0	0.00105857	0	0	0	0	0	0	0	0	0	0	0	0	0.000122073	0.000133191	0	0	0	0	0
Providencia_stuartii	0	0	0	0	0	0	0	0	0	0.000255558	0	0	0	0	0	0	0	0	0	0	0	0	0	0	0	0	0	0	0	0	0	0	0	0	0.000214707	0	0	0	0	0	0	0	0	0	0	0	0	0	0
Pseudoalteromonas_haloplanktis	0	0	0	0	0	0	0	0	0	0	0	0	0	0	0	0	0	0	0	0	0	0	0	0	0	0	0	0	0	0.00211715	0	0	0	0	0	0	0	0	0	0	0	0	0	0	0	0	0	0	0
Pseudoflavonifractor_capillosus	0	0	0	0	0	0	0	0	0	0	0	0	0	0	0	0	0	0	0	3.01126e-05	0	0	0	0	0	0	0	0	0	0	0	0	0	0	0	0	0	0	0	0	0	0	0	0	0	0	0	0	0
Pseudoglutamicibacter_albus	0	0	0	0	0	0	0	0	0	0	0	0	0	0	0	0	0	0	0	0	0	0	0	0	0	0	0	0	0	0	0	0	0	0	0	0	0	0	0	0	0	0	2.44147e-05	0	0	0	0	0	0
Pseudomonas_aeruginosa	0	0	0	0	0	0	0	0	0	0	0	0	0	0	0	2.6588e-05	0	0	0	0	0	0.000675295	0	0.000884173	0	0	5.36265e-05	0	0	0	0.0048727	0	0.309809	0	0	0	0	0	0	0	0	0	0	0	0	0	0	0	0.00140767
Pseudomonas_alcaligenes	0	0	0.00449102	0	0	0.000492429	0	0	0.00276625	0.00159724	0	0	1.68101e-05	0	0	1.3294e-05	0	0	0	4.3018e-06	0	0.000112549	0	0	0	0	0	0	0	0	9.7454e-05	0	0	0	0.00161031	0	0	0	0	0	0	0	8.54513e-05	0.000199787	0.0241935	0	0	0	0.00045993
Pseudomonas_brassicacearum	0	0	0	0	0	0	0	0	0	0	0	0	0	0	0	1.3294e-05	0	0	0	0	0.00104712	0	0	0	0	0	0	0	0	0.000705716	0.00105981	0	0	0	0.00085883	0	0	0	0	0	0	0	0	0	0	0	0.000554324	0	0
Pseudomonas_chlororaphis	0.00118906	0	0.00598802	0	0.000178031	0.000615536	0.00059755	0	0	0.000127779	0.000130225	0	0	0	0	5.31759e-05	0	0	0	0	0	0	0	0	0	0	0	0	0	0.000705716	0.0104398	0	0.000971188	0	0.00611916	0.00300752	0	0	0.00303797	0	0	0	0	0	0	0	0	0	0
Pseudomonas_entomophila	0	0	0.010479	0	0.000178031	0.000246214	0.000298775	0	0	0.000383338	0	0	0	5.85572e-05	0	0	0	0	0	0	0	0	0	0	0	0	0	0	0	0	0	0	0.000647459	0	0.00536769	0	0	0	0	0	0	0	0	0	0	0	0	0	5.57491e-05
Pseudomonas_fluorescens	0.00237812	0	0	0	0	0.000984858	0.00134449	0	0	0.00351393	0	0	0	1.95191e-05	0	0	0	0	0	0	0.00209424	0	0	0	0	0	0	1.15154e-05	0	0.00247001	0.0591668	8.90107e-05	0	4.8534e-06	0.0085883	0	0	0	0.00303797	0.00011422	0.000924214	0	0	0	0	0	0	0	0.00015331
Pseudomonas_fulva	0	0	0	0	0	0	0	0	0	0.00817787	0	0	0	5.85572e-05	0	1.3294e-05	0	0	0	4.3018e-06	0	0	0	0	0	0	0	0	0	0.00105857	2.43635e-05	0	0	0	0	0	0	0	0	0	0	0	0	0	0	0	0	0	0.00274564
Pseudomonas_luteola	0	0	0	0	0	0	0	0	0	0.000255558	0	0	0	0.000117114	0	0	0	0	0	0	0	0	0	0	0	0	0	0	0	0	0	0	0	0	0.000214707	0	0	0	0	0	0	0	0	0	0	0	0	0	5.57491e-05
Pseudomonas_mendocina	0	0.000523165	0	0	0	0.00160039	0.000298775	0	0	0.000766675	0	0	0	0	0	0	0	0	0	0	0.0188482	0	0	0	0	0	0.000107253	0	0	0.00105857	0	0	0	0	0.00354267	0.00300752	0	0	0.00219409	0	0	0	0	0.000332978	0	0	0	0	0.000362369
Pseudomonas_monteilii	0	0	0	0	0	0	0	0.00548446	0.00276625	0.00351393	0	0	0	0	0	0.00019941	0	0	0	0	0	0	0	0	0	0	0	0	0	0	0.000255817	0	0	0	0	0	0	0	0	0	0	0	0	0	0	0	0	0	0.000404181
Pseudomonas_mosselii	0	0.000116259	0	0	0.000356062	0.000615536	0.00059755	0.00548446	0	0.000511117	0	0	0	0	0	0	0	0	0.010929	4.3018e-06	0.00209424	0	0	0.000884173	0	0	0	0	0	0.00176429	0	3.56043e-05	0	0	0.00880301	0	0	0	0	0	0	0	0	0	0	0	0	0.000518941	0.00015331
Pseudomonas_oleovorans	0	0	0.00598802	0	0.000356062	0.00357011	0.000746938	0	0	0	0.000130225	0	0	0	0	1.3294e-05	0.00107991	0	0	1.72072e-05	0	0	0	0	0	0	0	0	0	0	0.000170545	3.56043e-05	0	0	0.0219002	0	0	0.00164813	0.00506329	0	0	0.0118577	0	0	0	0	0	0.000518941	0.00529617
Pseudomonas_oryzihabitans	0	0	0	0	0.000267046	0.000492429	0.000448163	0	0	0.00364171	0.000260451	0	0	9.75953e-05	0	2.6588e-05	0	0	0	0	0	0	0	0	0	0	0	0	0	0.00176429	0	0	0.000647459	0	0.00182501	0.00451128	0	0	0.00151899	0	0.000924214	0	4.88293e-05	0	0	0	0	0	0.00015331
Pseudomonas_poae	0	0	0	0	0	0	0.000298775	0	0	0.000383338	0	0	0	0	0	5.31759e-05	0	0	0	0	0	0	0	0	0	0	0	0	0	0.000705716	0.0150323	3.56043e-05	0	0	0.000214707	0	0	0	0.000337553	0	0	0	0	0	0	0	0	0	0
Pseudomonas_protegens	0	0	0.00299401	0	0.000178031	0	0	0.00548446	0	0	0	0	0	0	0	6.64699e-05	0	0	0	0	0.00104712	0	0	0	0	0	0	0	0.000107724	0	0.00308198	0	0	4.8534e-06	0.00322061	0	0	0	0.00101266	0	0.000924214	0	2.44147e-05	0	0	0	0	0.000518941	5.57491e-05
Pseudomonas_putida	0	0	0	0	0	0	0.000896325	0	0	0.00268336	0.000130225	0	0	0	0	0	0	0	0	8.60359e-06	0	0.000112549	0	0.00309461	0	0	0	0	0	0	0	0	0	0	0	0	0	0	0	0	0	0	0	0	0	0	0	0.000778412	0.000599303
Pseudomonas_resinovorans	0	0	0.00299401	0	0.000178031	0.000246214	0	0	0	0.000127779	0	0	0	0	0	0	0	0	0	8.60359e-06	0.00209424	0	0	0	0	0	0	0	0	0	0	0	0	0	0.00107354	0	0	0	0.000675105	0	0.000924214	0.0118577	0	0.000133191	0	0	0	0	0
Pseudomonas_stutzeri	0	0	0	0	0.0142425	0	0	0	0	0	0	0	0	0	0	1.3294e-05	0	0	0	0	0	0	0	0	0	0.00055991	0	0	0	0	0.00127908	0	0	0	0	0	0	0	0	0	0	0	0	0	0	0	0	0	0.00968641
Pseudomonas_syringae	0	0	0	0	0	0	0	0	0	0.000127779	0	0	0	0	0	2.6588e-05	0	0	0	0	0	0	0	0	0	0	0	0	0	0.000705716	0.00259471	0	0	0	0.000429415	0	0	0	0.000337553	0	0	0	0	0	0	0	0	0	0.000362369
Pseudomonas_veronii	0	0	0	0	0	0.00160039	0.0011951	0.0182815	0	0.00146946	0	0	0	0	0	6.64699e-05	0.00107991	0	0	4.3018e-06	0	0	0	0	0	0	0	0	0	0	0.0523084	0.000124615	0	4.8534e-06	0.0242619	0	0	0.00164813	0.00894515	0	0	0	0	0	0	0	0	0	0.00015331
Pseudomonas_viridiflava	0	0	0.00299401	0	0	0	0	0	0	0.000255558	0	0	0	0	0	1.3294e-05	0	0	0	0	0	0	0	0	0	0	0	0	0	0.000705716	0.00314289	0	0	4.8534e-06	0.000214707	0	0	0.000824063	0	0	0	0	4.88293e-05	0	0	1.47859e-05	0	0	0.000209059
Pseudonocardia_dioxanivorans	0	0	0	0	0	0	0	0.00548446	0	0.000127779	0	0	0	0	0	0	0	0	0	0	0	0	0	0	0	0	0	0	0	0	0	0	0	0	0	0	0	0	0	0	0	0	0	0	0	0	0	0	5.57491e-05
Pseudoramibacter_alactolyticus	0	0	0	0	0	0	0	0	0	0	0.000260451	0	0	0	0	2.6588e-05	0	0	0.00546448	0	0	0	0	0	0	0	0	0	0	0	0	3.56043e-05	0	0	0	0	0	0	0	0	0	0	0	0	0	4.43577e-05	0	0	0
Pseudoxanthomonas_Mexicana	0	0	0	0	0.00249243	0.000246214	0.000298775	0	0	0.000127779	0	0	0	0	0	0	0	0	0	4.3018e-06	0	0	0	0	0	0	0	0	0	0.00105857	2.43635e-05	0	0	0	0.000214707	0	0	0	0	0	0	0	0	0	0	0	0	0.000518941	0.000250871
Pseudoxanthomonas_spadix	0	0	0	0	0.000534093	0	0	0	0	0.000127779	0	0	0	0	0	0	0	0	0	0	0	0	0	0	0	0	0	0	0	0	0	0	0	0	0	0	0	0	0	0	0	0	0	0	0	0	0	0	0
Pseudoxanthomonas_suwonensis	0	0.000116259	0	0	0.00258145	0	0	0	0	0.000638896	0	0	0	1.95191e-05	0	0	0	0	0	0	0	0	0	0	0	0	0	0	0	0.000705716	0	0	0	0	0.000429415	0	0	0	0.00118143	0	0	0.0118577	0	0.000133191	0	0	0	0	5.57491e-05
Psychrobacter_arcticus	0	0	0	0	0	0	0	0	0	0	0	0	0	0	0	0	0	0	0	0	0	0	0	0	0	0	0	0	0	0	0	0	0	0	0	0	0	0	0	0	0	0	0	0	0	0	0	0	0
Psychrobacter_cryohalolentis	0	0	0	0	0	0	0	0	0	0	0	0	0	0	0	0	0	0	0	0	0	0	0	0	0	0	0	0	0	0	0	0	0	0	0	0	0	0	0	0	0	0	0	0	0	0	0	0	0
Psychrobacter_phenylpyruvicus	0	0	0	0	0	0	0	0	0	0.000127779	0	0	0	0	0	0	0	0	0	0	0	0	0	0	0	0	0	0	0	0	0	0	0	0	0.000214707	0	0	0	0	0	0	0	0	0	0	0	0	0	0
Puccinia_arachidis	0.00118906	0	0	0	0.000623108	0	0	0	0	0.000958344	0	0	0	0	0	0	0	0	0	4.3018e-06	0.00104712	0	0	0	0	0	0	0	0	0.00141143	0.000243635	0	0.000647459	0	0.00085883	0	0	0	0.00101266	0	0.000924214	0	2.44147e-05	0	0	0	0	0	5.57491e-05
Puccinia_coronata	0	0	0	0	0	0	0	0	0	0	0	0	0	0	0	0	0	0	0	0	0	0	0	0	0	0	0	0	0	0	0	0	0	0	0	0	0	0	0	0	0	0	0	0	0	0	0	0	0
Puccinia_hordei	0	0	0	0	0	0	0	0	0	0.000383338	0	0	0	0	0	0	0	0	0	0	0	0	0	0	0	0	0	0	0	0	0	0	0	0	0	0	0	0	0	0	0	0	0	0	0	0	0	0	0
Puccinia_horiana	0	0	0	0	0	0	0	0	0	0	0	0	0	0	0	0	0	0	0	0	0	0.000112549	0	0	0	0	0	0	0	0	0	0	0	0	0	0	0	0	0	0	0	0	0	0	0	0	0	0	0
Puccinia_striiformis	0	0	0.00449102	0.0168067	0	0.000246214	0	0	0	0.00447227	0	0	0	0	0	1.3294e-05	0	0	0	4.3018e-06	0	0	0	0	0	0	0	0	0	0.00388144	2.43635e-05	0	0	0	0.000214707	0	0	0.000824063	0.000675105	0	0	0	0	0	0	0	0	0	0.00015331
Purpureocillium_lilacinum	0	0	0	0	0	0	0	0	0	0	0	0	0	0	0	0	0	0	0	0	0	0	0	0	0	0	0	0	0	0	0	0	0	0	0	0	0	0	0	0	0	0	0	0	0	0	0	0	0
Pyramidobacter_piscolens	0	0.000116259	0	0	0.000178031	0	0	0	0	0	0.000130225	0	0	0	0	0	0	0	0	1.72072e-05	0	0	0	0	0	0	0	0	0	0	0	0.000178021	0	9.70681e-06	0	0	0	0	0	0.00011422	0	0	2.44147e-05	0.000133191	0	1.47859e-05	0	0	0
Pyricularia_grisea	0.00118906	0	0	0	0	0	0	0	0	0.000255558	0	0	0	0	0	0	0	0	0	0	0.00104712	0	0	0	0	0	0	0	0	0	0	0	0	0	0	0	0	0	0	0	0	0	0	0	0	0	0	0	0
Pyricularia_oryzae	0	0.000406906	0	0.0588235	0.000178031	0	0	0.0127971	0	0	0	0	0	0	0	0	0	0	0	0	0	0	0	0	0	0	0	0	0.000269309	0	0	0	0	0	0.00354267	0.0255639	0	0	0.000506329	0.000685323	0	0	0	0	0	2.95718e-05	0.000554324	0	0
Pyrobaculum_aerophilum	0	0	0	0	0	0	0	0	0	0	0	0	0	0	0	0	0	0	0	1.72072e-05	0.00104712	0	0	0	0	0	0	0	0	0	0	0	0	7.2801e-06	0	0	0	0	0.000337553	0	0	0	0	0	0	0	0	0	0.000111498
Rahnella_aquatilis	0	0	0	0	0	0.000984858	0.000298775	0	0	0.000127779	0	0	0	0	0	0	0	0	0	0	0	0	0	0	0	0	0	0	0	0.000705716	0	0	0	0	0	0	0.00164474	0	0.000337553	0	0	0	2.44147e-05	0	0	0	0	0	5.57491e-05
Ralstonia_insidiosa	0	0	0	0	0.000178031	0.00135418	0	0.00548446	0	0.000958344	0	0	0	0	0	0	0	0	0	0	0	0	0	0	0	0	0	0	0	0	2.43635e-05	0	0	0	0.00107354	0	0	0	0	0	0	0	0.000439464	0	0	0	0	0	0.000111498
Ralstonia_mannitolilytica	0	0	0	0	0	0.000492429	0.000298775	0.00548446	0	0.000638896	0.000130225	0	0	0.000136633	0	0	0	0	0	0	0	0	0	0	0	0	0	0	0.000269309	0	0	5.34064e-05	0	0	0.00236178	0	0	0	0	0	0	0.0118577	0.00018311	0	0	0	0	0	0.00015331
Ralstonia_pickettii	0	0	0.00449102	0	0	0.00135418	0.000298775	0	0	0.00396116	0	0.0175439	1.68101e-05	9.75953e-05	0	2.6588e-05	0.00107991	0	0	4.3018e-06	0	0	0	0	0	0	0	0	0	0	0	0	0	0	0	0	0	0	0	0	0	0	0	0	0	0	0	0.000518941	0.000599303
Ralstonia_solanacearum	0	0	0	0	0.000356062	0.0017235	0.0011951	0	0.00276625	0	0	0	0	0	0	0	0	0	0	0	0	0	0	0	0	0	5.36265e-05	0	0	0	0	8.90107e-05	0	0	0	0	0	0	0	0	0	0	0	0	0	0	0	0	0.000599303
Ramichloridium_luteum	0	0	0	0	0	0	0	0	0	0	0	0	0	0	0	0	0	0	0	0	0	0	0	0	0	0	0	0	0	0	0	0	0	0	0	0	0	0	0	0	0	0	0	0	0	0	0	0	0
Ramlibacter_tataouinensis	0	0	0	0	0	0	0	0	0	0.000127779	0	0	0	0	0	0	0	0	0	0	0	0	0	0	0	0	0	0	0	0	0	0	0	0	0	0	0	0	0	0	0	0	0	0	0	0	0	0	0
Raoultella_ornithinolytica	0	0	0	0	0	0	0	0	0	0	0	0	0	0	4.2996e-05	0	0	0	0	0	0	0.000112549	0	0	0	0	0	0	0	0	0	0	0	0	0	0	0	0	0	0	0	0	0	0	0	0	0	0	5.57491e-05
Raoultella_planticola	0	0	0	0	0	0	0	0	0	0	0	0	0	0	0	0	0	0	0	0	0	0	0	0	0	0	0	0	0	0	0	0	0	0	0	0	0	0	0	0	0	0	0	0	0	0	0	0	0
Raoultella_terrigena	0	0	0	0	0	0	0	0	0	0	0	0	0	0	0	0	0	0	0	0	0	0	0	0	0	0	0	0	0	0	0	0	0	0	0	0	0	0	0	0	0	0	4.88293e-05	0	0	0	0	0	0
Renibacterium_salmoninarum	0	0	0	0	0	0	0	0	0	0	0	0	0	0	0	0	0	0	0	0	0	0	0	0	0	0	0	0	0	0	0	0	0	0	0	0	0	0	0.000337553	0	0	0	0	0	0	0	0	0	0
Rhizobium_etli	0	0	0	0	0	0	0	0	0	0	0	0	0	0	0	0	0	0	0	0	0	0	0	0	0	0	0	0	0	0	0	0	0	0	0	0	0	0	0	0	0	0	0	0	0	0	0	0	0
Rhizobium_leguminosarum	0	0	0	0	0	0	0	0	0.00276625	0.000127779	0	0	0	0	0	0	0	0	0	0	0	0	0	0	0	0	0	0	0	0	0	0	0	4.8534e-06	0.000644122	0	0	0	0.000506329	0	0	0	4.88293e-05	0	0	0	0	0	0
Rhizobium_pusense	0	0	0.00299401	0	0	0.0017235	0.000746938	0	0	0.00217225	0	0	0	1.95191e-05	0	0	0	0	0	4.3018e-06	0	0	0	0	0	0	0	0	0	0	0.000109636	0	0	0	0	0	0	0	0	0	0	0	0	0	0	0	0	0	0.000111498
Rhizobium_tropici	0	0	0	0	0	0	0	0	0	0	0	0	0	0	0	0	0	0	0	0	0	0	0	0	0	0	0	0	0	0	0	0	0	0	0	0	0	0	0	0	0	0	0	0	0	0	0	0	5.57491e-05
Rhizoctonia_solani	0	0.000348776	0	0	0	0	0	0	0	0	0	0	0	0	0	0	0	0	0	0	0	0	0	0	0	0	0	0	0	0	0	0	0	0	0	0	0	0	0	0	0	0	0	0	0	0	0	0	0
Rhizopus_microsporus	0	0	0	0	0	0	0	0	0	0	0	0	0	0	0	0	0	0	0	0	0	0	0	0	0	0	0	0	0	0	0	0	0	4.8534e-06	0	0	0	0	0	0	0	0	0	0	0	0	0	0	0
Rhizopus_stolonifer	0	0.000116259	0	0.0168067	0	0	0	0	0	0	0	0	0	0	0	0	0	0	0	0	0	0	0	0	0	0	0	0	0	0	0	0	0	0	0	0	0	0	0	0	0	0	0	0	0	0	0	0	0
Rhodobacter_capsulatus	0	0	0	0	0	0	0	0	0	0	0	0	0	0	0	0	0	0	0	0	0	0	0	0	0	0	0	0	0	0	2.43635e-05	0	0	0	0	0	0	0	0	0	0	0	0	0	0	0	0	0	0
Rhodobacter_sphaeroides	0	0	0	0	0	0	0	0	0	0	0	0	0	0	0	0	0	0	0	0	0	0	0	0	0	0	0	0	0	0.000705716	0	0	0	0	0.000214707	0	0	0	0	0	0	0	0	0	0	0	0	0	0.000111498
Rhodococcus_coprophilus	0	0	0	0	0	0.000246214	0	0	0	0	0	0	0	0	0	0	0	0	0	0	0	0	0	0	0	0	0	0	0	0	0	0	0	0	0	0	0	0	0	0	0	0	0	0	0	0	0	0	0
Rhodococcus_erythropolis	0	0	0	0	0.00293751	0.00861751	0	0	0	0	0	0	0	9.75953e-05	0	3.98819e-05	0	0	0.00546448	6.02252e-05	0.00104712	0.000112549	0	0	0	0	0	1.15154e-05	0	0.0067043	2.43635e-05	3.56043e-05	0.00258983	0	0	0.0075188	0	0	0	0	0	0.0118577	0	0	0	0	0	0.000778412	0.000961672
Rhodococcus_fascians	0	0.000116259	0.00598802	0	0.000356062	0.0017235	0.00179265	0	0.00276625	0.00191669	0	0	0	0	0	0	0	0	0	0	0	0	0	0	0	0	0	1.15154e-05	0	0.00176429	2.43635e-05	5.34064e-05	0.000971188	7.2801e-06	0.00848094	0.00451128	0	0.000824063	0.00742616	0	0	0.0118577	0	0	0	0	0.000554324	0.00129735	0.00030662
Rhodococcus_pyridinivorans	0	0	0	0	0	0	0.000298775	0	0	0	0	0	0	0	0	0	0	0	0	0	0	0	0	0	0	0	0	0	0	0	0	0	0	0	0.000214707	0	0	0	0	0	0	0	2.44147e-05	0	0	0	0	0	0
Rhodococcus_rhodochrous	0	0	0	0	0	0	0	0	0	0	0	0	0	0	0	0	0	0	0	0	0	0	0	0	0	0	0	0	0	0	0	0	0	0	0	0	0	0.000824063	0	0	0	0	0	0	0	0	0	0	0
Rhodococcus_ruber	0	0	0	0	0	0	0	0	0	0	0	0	0	0	0	0	0	0	0	0	0	0	0	0	0	0	0	0	0	0	0	0	0	0	0.000644122	0	0	0	0	0	0	0	2.44147e-05	0	0	0	0	0	0.00015331
Rhodoferax_ferrireducens	0	0	0	0	0	0	0	0	0	0	0	0	0	0	0	0	0	0	0	0	0	0	0	0	0	0	0	0	0	0	0	0	0	0	0.000214707	0	0	0	0	0	0	0	0	0	0	0	0	0	0
Rhodopseudomonas_palustris	0	0	0	0	0	0.000246214	0	0	0	0.000127779	0	0	0	0	0	0	0	0	0	0	0.00104712	0	0	0	0	0	0	0	0	0.00176429	2.43635e-05	0	0	0	0.000214707	0	0	0	0.000337553	0	0	0	2.44147e-05	0	0	0	0.000554324	0	5.57491e-05
Rhodospirillum_centenum	0	0	0	0	0	0	0	0	0	0	0	0	0	0	0	0	0	0	0	0	0	0	0	0	0	0	0	0	0	0	0	0	0	0	0.000214707	0	0	0	0	0	0	0	0	0	0	0	0	0	5.57491e-05
Rhodothermus_marinus	0	0	0	0	0	0	0	0	0	0	0	0	0	0	0	0	0	0	0	0	0	0	0	0	0	0	0	0	0	0	0	0	0	0	0	0	0	0	0	0	0	0	0	0	0	0	0	0	0
Rhodotorula_diobovata	0	0	0	0	0.000178031	0	0	0	0	0.000127779	0	0	0	0	0	0	0	0	0	0	0	0	0	0	0	0	0	0	0	0	0	0	0	0	0	0	0	0	0	0	0	0	0	0.000133191	0	0	0	0	0
Rhodotorula_graminis	0	0	0	0	0	0	0	0	0	0	0	0	0	0	0	0	0	0	0	0	0	0	0	0	0	0	0	0	0	0	0	0	0	0	0	0	0	0	0	0	0	0	0	0	0	0	0	0	0
Rhodotorula_kratochvilovae	0	0	0	0	0	0	0	0	0	0	0	0	0	0	0	0	0	0	0	0	0	0	0	0	0	0	0	0	0	0	0	0	0	0	0	0	0	0	0	0	0	0	0	0	0	0	0	0	0
Rhodotorula_mucilaginosa	0	0.000232518	0	0	0	0	0	0	0	0.000383338	0	0	0	0	0	0	0	0	0	0	0	0	0	0	0.05	0	0	0	0	0.0067043	3.65453e-05	3.56043e-05	0	0	0	0	0	0	0.000337553	0	0	0	0	0	0	0	0	0	0
Rhodotorula_taiwanensis	0	0	0	0	0	0	0	0	0	0	0	0	0	0	0	0	0	0	0	0	0	0	0	0	0	0	0	0	0	0	0	0	0	0	0	0	0	0	0	0	0	0	0	0	0	0	0	0	0
Rhodotorula_toruloides	0	0	0	0	0	0	0	0	0	0	0	0	0	0	0	0	0	0	0	0	0	0	0	0	0	0	0	0	0	0	0	0	0	0	0	0	0	0	0	0	0	0	0	0	0	0	0	0	0
Rickettsia_bellii	0	0	0	0	0	0	0	0	0	0	0	0	0	0	0	0	0	0	0	0	0	0	0	0	0	0	0	0	0	0	0	0	0	0	0	0	0	0	0	0	0	0	0	0	0	0	0	0	0
Rickettsia_felis	0	0	0	0	0	0	0	0	0	0	0	0	0	0	0	0	0	0	0	0	0	0	0	0	0	0	0	0	0	0	0	0	0	0	0	0	0	0	0	0	0	0	2.44147e-05	0	0	0	0	0	0
Riemerella_anatipestifer	0	0	0	0	0	0	0	0.00548446	0	0	0	0	0	1.95191e-05	0	2.6588e-05	0	0	0	0	0.00314136	0	0	0	0	0	0	0	0	0	0	0	0	0	0	0	0	0	0	0	0	0	0	0	0	0	0	0	0
Robinsoniella_peoriensis	0	0	0	0	0	0	0	0	0	0	0	0	0	0	0	0	0	0	0	0	0	0	0	0	0	0	0	0	0	0	0	0	0	0	0	0	0	0	0.00118143	0	0	0	0	0	0	0	0	0	0
Rodentibacter_pneumotropicus	0	0	0	0	0	0	0	0	0	0	0	0	0	0	0	2.6588e-05	0	0	0	0	0	0	0	0	0	0	0	0	0	0	0	0	0	4.8534e-06	0	0	0	0	0	0	0	0	0	0	0	0	0	0	0
Roseburia_hominis	0	0	0	0	0	0.000246214	0	0	0	0	0	0	0	0	0	0	0	0	0	0	0	0	0	0	0	0	0	0	0	0	0	0	0	0	0	0	0	0	0	0	0	0	0	0	0	0	0	0	0
Roseburia_intestinalis	0	0	0	0	0	0	0.000298775	0	0	0.000127779	0	0	0	0	0	1.3294e-05	0	0	0	1.72072e-05	0	0	0	0	0	0	0	0	0	0	9.7454e-05	0	0	2.18403e-05	0.000214707	0	0	0	0	0	0	0	0	0	0	0	0	0	0
Roseburia_inulinivorans	0	0	0	0	0	0.000246214	0	0	0	0.000255558	0	0	0	0	0	1.3294e-05	0	0	0	4.3018e-06	0	0	0	0	0	0	0	0	0	0	0	0	0	1.21335e-05	0.000644122	0	0	0	0	0	0	0	0	0	0	0	0	0	0.00015331
Roseobacter_denitrificans	0	0	0	0	0	0	0	0	0	0.000127779	0	0	0	0	0	0	0	0	0	0	0	0	0	0	0	0	0	0	0	0	0	0	0	0	0.000214707	0	0	0	0	0	0	0	0	0	0	0	0	0	0
Roseomonas_cervicalis	0	0	0	0	0	0	0	0	0	0	0	0	0	0	0	0	0	0	0	0	0	0.000112549	0	0	0	0	0	0	0	0	0	0	0	0	0.000644122	0	0	0	0.000337553	0	0	0	0	0	0	0	0	0	0
Roseomonas_gilardii	0	0	0	0	0	0	0	0	0	0.000127779	0	0	0	0	0	0	0	0	0	4.3018e-06	0	0	0	0	0	0	0	0	0	0	0	0	0	0	0	0	0	0	0	0	0	0	0	0	0	0	0	0	0
Roseomonas_mucosa	0	0	0.00299401	0	0	0.000246214	0.000448163	0	0.00276625	0	0	0.0175439	0	0	0	0	0	0	0	0	0	0	0	0	0	0	0	0	0	0.000705716	0	3.56043e-05	0.000971188	0	0.00665593	0	0	0	0.00101266	0	0	0	0	0.000133191	0.016129	0	0	0.000518941	0.000501742
Rothia_aeria	0	0.000116259	0	0	0	0.000246214	0.000746938	0.00914077	0	0.00300281	0.00143248	0	0	1.95191e-05	0	0.000305762	0	0	0.00546448	2.1509e-05	0	0	0	0.00530504	0	0	5.36265e-05	0	0	0.00141143	0.00331344	0.000320439	0	2.91204e-05	0.00085883	0	0	0	0.000675105	0	0	0	0	0.000133191	0	0.000229181	0	0	5.57491e-05
Rothia_dentocariosa	0	0	0	0	0	0	0.000448163	0.00548446	0	0.000894454	0.000260451	0	0	0	0	0.000212704	0	0	0.00546448	1.29054e-05	0	0	0.043956	0	0	0	0.00380748	0	0.000215448	0.000705716	0.00104763	3.56043e-05	0.000647459	0	0.00118089	0	0	0	0.00135021	0	0	0	0	0	0	0	0	0	0.000111498
Rothia_mucilaginosa	0.00118906	0.00360402	0	0	0.0040057	0.000492429	0	0.0694698	0	0.000638896	0.0223987	0	1.68101e-05	0.0564296	0.00417061	0.112653	0	0	0.00546448	8.60359e-06	0	0.000112549	0	0.0822281	0	0.00503919	0.00544309	0.00192883	0	0.0042343	0.078219	8.90107e-05	0.000647459	0.000356725	0.00118089	0.0406015	0.00822368	0	0.00658228	0	0.00323475	0	0.00791035	0.321324	0	0.0117252	0.303215	0	0.000362369
Rubrivivax_gelatinosus	0	0	0	0	0.000178031	0	0	0	0	0.000127779	0	0	0	0	0	0	0	0	0	0	0	0	0	0	0	0	0	0	0	0	0	0	0	0	0.000214707	0	0	0	0	0	0	0	0	0	0	0	0	0	0
Rubrobacter_xylanophilus	0	0	0	0	0	0	0	0	0	0	0	0	0	0	0	0	0	0	0	0	0	0	0	0	0	0	0	0	0	0	0	0	0	0	0	0	0	0	0	0	0	0	0	0	0	0	0	0	0
[truncated: 335 more rows]
[truncated: 60 more columns]
